# Supplementary material for: Uncovering the Contribution of Moderate-Penetrance Susceptibility Genes to Breast Cancer by Whole-Exome Sequencing and Targeted Enrichment Sequencing of Candidate Genes in Women of European Ancestry
Source: Cancers (Basel). 2022 Jul 11;14(14):3363. doi: 10.3390/cancers14143363 (PMC9317824; doi:10.3390/cancers14143363)
Supplement: Supplementary file 1 [file cancers-14-03363-s001.zip]

Archive with 13 entries (13 files):
- Figure S1-final_16052022.pptx
- Supplementary materials_revised_07072022_clean.pdf
- Table S1-revised_final_23062022.pdf
- Table S10-final_16052022.xlsx
- Table S11-final_16052022.xlsx
- Table S2-final_16052022.xlsx
- Table S3-final_16052022.xlsx
- Table S4-final_16052022.xlsx
- Table S5-final_16052022.xlsx
- Table S6-final_16052022.xlsx
- Table S7-final_16052022.xlsx
- Table S8-final_16052022.xlsx
- Table S9-final_16052022.xlsx
