# Supplementary material for: Uncovering the Contribution of Moderate-Penetrance Susceptibility Genes to Breast Cancer by Whole-Exome Sequencing and Targeted Enrichment Sequencing of Candidate Genes in Women of European Ancestry
Source: Cancers (Basel). 2022 Jul 11;14(14):3363. doi: 10.3390/cancers14143363 (PMC9317824; doi:10.3390/cancers14143363)
Supplement: Supplementary file 1 [file cancers-14-03363-s001.zip › Table S2-final_16052022.xlsx]

## Sheet: Table-Gene list
Table S2: Selection of genes for the validation stage according to gene prioritization strategies.
Gene symbol	Approved name	Chromosome	NCBI Gene ID	RefSeq IDs	UniProt ID	Gene prioritization strategy for selection *	Genes ranked in top-30 by others strategies	Genes ranked in top-500 by others strategies	UniProtKB/Swiss-Prot Function		Pathways***
AKT1	AKT serine/threonine kinase 1	14q32.33	207	NM_005163	P31749	Known/putative BC susceptibility gene			Regulates many processes including metabolism, proliferation, cell survival, growth and angiogenesis.	PubMed:15526160, PubMed:11882383, PubMed:21620960, PubMed:21432781	RET signaling
ATM	ATM serine/threonine kinase	11q22.3	472	NM_000051	Q13315	Known/putative BC susceptibility gene			Activates checkpoint signaling upon double strand breaks, apoptosis and genotoxic stresses.	PubMed:9843217, PubMed:9733515, PubMed:10550055	Regulation of activated PAK-2p34 by proteasome mediated degradation	DNA Double-Strand Break Repair	Resolution of D-loop Structures through Holliday Junction Intermediates
BARD1	BRCA1 associated RING domain 1	2q35	580	NM_000465	Q99728	Known/putative BC susceptibility gene			Mediates the formation of 'Lys-6'-linked polyubiquitin chains and coordinates a diverse range of cellular pathways to maintain genomic stability.		DNA Double-Strand Break Repair	Resolution of D-loop Structures through Holliday Junction Intermediates
BRE/BABAM2	BRISC and BRCA1 A complex member 2	2p23.2	9577	NM_004899	Q9NXR7	Known/putative BC susceptibility gene			Component of BRCA1-A complex which recognizes 'Lys-63'-linked ubiquitinated histones H2A and H2AX at DNA lesions sites.	PubMed:17525341, PubMed:19261746, PubMed:19261749	DNA Double-Strand Break Repair	DNA Double Strand Break Response	Cell Cycle Checkpoints
BRIP1	BRCA1 interacting protein C-terminal helicase 1	17q23.2	83990	NM_032043	Q9BX63	Known/putative BC susceptibility gene			Required for the maintenance of chromosomal stability.		DNA Double-Strand Break Repair	Resolution of D-loop Structures through Holliday Junction Intermediates	Homologous DNA Pairing and Strand Exchange
CDH1	cadherin 1	16q22.1	999	NM_004360	P12830	Known/putative BC susceptibility gene			involved in mechanisms regulating cell-cell adhesions, mobility and proliferation of epithelial cells.	PubMed:11976333	Apoptotic execution phase	Cell junction organization
CHEK2	checkpoint kinase 2	22q12.1	11200	NM_001005735	O96017	Known/putative BC susceptibility gene			Required for checkpoint-mediated cell cycle arrest, activation of DNA repair and apoptosis in response to the presence of DNA double-strand breaks.		Regulation of activated PAK-2p34 by proteasome mediated degradation	DNA Double-Strand Break Repair	Regulation of TP53 Activity
EPCAM	epithelial cell adhesion molecule	2p21	4072	NM_002354	P16422	Known/putative BC susceptibility gene					Adhesion	Cytoskeletal Signaling
FAM175A/ABRAXAS1	abraxas 1, BRCA1 A complex subunit	4q21.23	84142	NM_139076	Q6UWZ7	Known/putative BC susceptibility gene			Part of the BRCA1-A complex, acting as a protein that assembles components of the complex and mediates the recruitment of BRCA1.		DNA Double-Strand Break Repair	DNA Double Strand Break Response	Cell Cycle Checkpoints
FANCC	Fanconi Anemia (FA) complementation group C	9q22.32	2176	NM_000136	Q00597	Known/putative BC susceptibility gene			DNA repair protein that may operate in a postreplication repair or a cell cycle checkpoint function.		Fanconi anemia pathway	BRCA1 Pathway	DNA Double-Strand Break Repair
FANCM	FA complementation group M	14q21.2	57697	NM_020937	Q8IYD8	Known/putative BC susceptibility gene			Required for the activation of the FA pathway, leading to monoubiquitination of the FANCI-FANCD2 complex in response to DNA damage.		Fanconi anemia pathway	DNA Double-Strand Break Repair
GEN1	GEN1 Holliday junction 5' flap endonuclease	2p24.2	348654	NM_182625	Q17RS7	Known/putative BC susceptibility gene			Resolves Holliday junctions (HJs) which are formed during homologous recombination and DNA repair necessary for proper chromosome segregation.	PubMed:19020614, PubMed:26682650	DNA Double-Strand Break Repair	Resolution of D-loop Structures through Holliday Junction Intermediates	Homologous DNA Pairing and Strand Exchange
MEN1	menin 1	11q13	0	NM_000244	O00255	Known/putative BC susceptibility gene			Part of a MLL/SET1 histone methyltransferase (HMT) complex, whcich methylates 'Lys-4' of histone H3. Functions as a transcriptional regulator.		Transcriptional activity of SMAD2/SMAD3-SMAD4 heterotrimer
MLH1	mutL homolog 1	3p22.2	4292	NM_000249	P40692	Known/putative BC susceptibility gene			Heterodimerizes with PMS2 to form MutL alpha, a component of the post-replicative DNA mismatch repair system.		Mismatch repair
MRE11A/MRE11	MRE11 homolog, double strand break repair nuclease	11q21	4361	NM_005591	P49959	Known/putative BC susceptibility gene			Part of the MRN complex, which plays a role in double-strand break repair, DNA recombination, maintenance of telomere integrity and meiosis.	PubMed:9651580, PubMed:9590181, PubMed:9705271	DNA Double-Strand Break Repair	Resolution of D-loop Structures through Holliday Junction Intermediates	DNA Double Strand Break Response
MSH2	mutS homolog 2	2p21-p16.3	4436	NM_000251	P43246	Known/putative BC susceptibility gene			Component of the DNA mismatch repair complex.		Mismatch repair
MSH6	mutS homolog 6	2p16.3	2956	NM_000179	P52701	Known/putative BC susceptibility gene			Component of the post-replicative DNA mismatch repair system.		Mismatch repair
MUTYH	mutY DNA glycosylase	1p34.1	4595	NM_012222	Q9UIF7	Known/putative BC susceptibility gene			Involved in oxidative DNA damage repair.		Telomere C-strand (Lagging Strand) Synthesis	Depurination	DNA Double-Strand Break Repair
NBN	nibrin	8q21.3	4683	NM_001024688	O60934	Known/putative BC susceptibility gene			Component of the MRN complex which interacts with MCM9; the interaction recruits the complex to DNA repair sites.	PubMed:26215093)	DNA Double-Strand Break Repair	Resolution of D-loop Structures through Holliday Junction Intermediates	DNA Double Strand Break Response
NF1	neurofibromin 1	17q11.2	4763	NM_000267	P21359	Known/putative BC susceptibility gene			Stimulates the GTPase activity of Ras. May be a regulator of Ras activity.		RET signaling	Signaling by PTK6
PALB2	partner and localizer of BRCA2	16p12.2	79728	NM_024675	Q86YC2	Known/putative BC susceptibility gene			Plays a critical role in homologous recombination repair through its ability to recruit BRCA2 and RAD51 to DNA breaks.	PubMed:16793542, PubMed:19423707, PubMed:19369211	Resolution of D-loop Structures through Holliday Junction Intermediates	DNA Double-Strand Break Repair	Homologous DNA Pairing and Strand Exchange
PIK3CA	phosphatidylinositol-4,5-bisphosphate 3-kinase catalytic subunit alpha	3q26.32	5290	NM_006218	P42336	Known/putative BC susceptibility gene			Uses ATP and PtdIns(4,5)P2 to generate PIP3 which pay a role by recruiting proteins to the membrane, including AKT1, activating signaling cascades.		RET signaling	Downstream signaling of activated FGFR2
PMS2	PMS1 homolog 2, mismatch repair system component	7p22.1	5395	NM_000535	P54278	Known/putative BC susceptibility gene			Component of the post-replicative DNA mismatch repair system.		Mismatch repair
PTEN	phosphatase and tensin homolog	10q23.31	5728	NM_000314	P60484	Known/putative BC susceptibility gene			Tumor suppressor. Acts as a dual-specificity protein phosphatase, dephosphorylating tyrosine-, serine- and threonine-phosphorylated proteins.		RET signaling
RAD50	RAD50 double strand break repair protein	5q31.1	10111	NM_005732	Q92878	Known/putative BC susceptibility gene			Component of the MRN complex, which plays a role in double-strand break repair, DNA recombination, maintenance of telomere integrity and meiosis.		DNA Double-Strand Break Repair	Resolution of D-loop Structures through Holliday Junction Intermediates	DNA Double Strand Break Response
RAD51C	RAD51 paralog C	17q22	5889	NM_058216	O43502	Known/putative BC susceptibility gene			Essential for the homologous recombination pathway of DNA repair.		Resolution of D-loop Structures through Holliday Junction Intermediates	DNA Double-Strand Break Repair	Homologous DNA Pairing and Strand Exchange
RAD51D	RAD51 paralog D	17q12	5892	NM_002878	O75771	Known/putative BC susceptibility gene			Involved in the homologous recombination repair (HRR) pathway of double-stranded DNA breaks.		Resolution of D-loop Structures through Holliday Junction Intermediates	DNA Double-Strand Break Repair	Homologous DNA Pairing and Strand Exchange
RECQL	RecQ like helicase	12p12.1	5965	NM_002907	P46063	Known/putative BC susceptibility gene			DNA helicase that may play a role in the repair of DNA that is damaged by ultraviolet light or other mutagens.		DNA Damage
RINT1	RAD50 interactor 1	7q22.3	60561	NM_021930	Q6NUQ1	Known/putative BC susceptibility gene			Regulation of membrane traffic between the Golgi and the endoplasmic reticulum. May play a role in cell cycle checkpoint and telomere lenght controls.	PubMed:11096100, PubMed:16600870	Golgi-to-ER retrograde transport
STK11	serine/threonine kinase 11	19p13.3	6794	NM_000455	Q15831	Known/putative BC susceptibility gene			Tumor suppressor serine/threonine-protein kinase that controls the activity of AMP-activated protein kinase family members.		RET signaling
TP53	tumor protein p53	17p13.1	7157	NM_000546	P04637	Known/putative BC susceptibility gene			Acts as a tumor suppressor in many tumor types; induces growth arrest or apoptosis depending on the physiological circumstances and cell type.		RET signaling	Regulation of activated PAK-2p34 by proteasome mediated degradation
XRCC2	X-ray repair cross complementing 2	7q36.1	7516	NM_005431	O43543	Known/putative BC susceptibility gene			Involved in the homologous recombination repair pathway of double-stranded DNA.		Resolution of D-loop Structures through Holliday Junction Intermediates	DNA Double-Strand Break Repair	Homologous DNA Pairing and Strand Exchange
ADAM29	ADAM metallopeptidase domain 29	4q34.1	11086	NM_001278127	Q9UKF5	1			May be involved in spermatogenesis and fertilization. Seems to be a non catalytic metalloprotease-like protein.		na
ATP2C1	ATPase secretory pathway Ca2+ transporting 1	3q22.1	27032	NM_001001486	P98194	1			ATP-driven pump that supplies the Golgi apparatus with Ca(2+) and Mn(2+) ions.	PubMed:16192278, PubMed:30923126, PubMed:21187401,	CREB Pathway
BPTF	bromodomain PHD finger transcription factor	17q24.2	2186	NM_182641	Q12830	1		5	Histone-binding component of NURF, a complex which catalyzes ATP-dependent nucleosome sliding and facilitates transcription of chromatin.		Mesodermal Commitment Pathway
CCDC66	coiled-coil domain containing 66	3p14.3	285331	NM_001012506	A2RUB6	1		3, 4	Microtubule-binding protein required for ciliogenesis	PubMed:28235840	na
CLINT1	clathrin interactor 1	5q33.3	9685	NM_014666	Q14677	1			Binds to membranes enriched in PtdIns(4,5)P2.		Clathrin derived vesicle budding
DNAH11	dynein axonemal heavy chain 11	7p15.3	8701	NM_001277115	Q96DT5	1		3	Force generating protein of respiratory cilia		Parkinson disease
DNAH8	dynein axonemal heavy chain 8	6p21.2	1769	NM_001206927	Q96JB1	1		3, 2	Force generating protein component of the outer dynein arms in the sperm flagellum		Parkinson disease
DYNC2H1	dynein cytoplasmic 2 heavy chain 1	11q22.3	79659	NM_001080463	Q8NCM8	1		2	May function as a motor for intraflagellar retrograde transport		Organelle biogenesis and maintenance
EFCAB5	EF-hand calcium binding domain 5	17q11.2	374786	NM_198529	A4FU69	1					na
ERCC6	ERCC excision repair 6, chromatin remodeling factor	10q11.23	2074	NM_000124	P0DP91, Q03468	1		2	Involved in transcription-coupled nucleotide excision repair which allows RNA pol II-blocking lesions to be removed from the transcribed strand of active genes.		Activated PKN1 stimulates transcription of AR (androgen receptor) regulated genes KLK2 and KLK3	Transcription-Coupled Nucleotide Excision Repair (TC-NER)
FBXO11	F-box protein 11	2p16.3	80204	NM_025133	Q86XK2	1		3	Substrate recognition component of a SCF E3 ubiquitin-protein ligase complex which mediates the ubiquitination and proteasomal degradation of proteins.		p53 pathway
HLA-DRB5	major histocompatibility complex, class II, DR beta 5	6p21.32	3127	NM_002125	Q30154	1			Binds peptides derived from antigens that access the endocytic route of antigen presenting cells and presents them for recognition by the CD4 T-cells.		Allograft rejection
MED23	mediator complex subunit 23	6q23.2	9439	NM_004830	Q9ULK4	1			Required for transcriptional activation subsequent to the assembly of the pre-initiation complex.		Regulation of lipid metabolism by Peroxisome proliferator-activated receptor alpha (PPARalpha)
NIPBL	NIPBL cohesin loading factor	5p13.2	25836	NM_015384	Q6KC79	1		4	Plays an important role in the loading of the cohesin complex on to DNA.		Cell Cycle, Mitotic
PDS5B	PDS5 cohesin associated factor B	13q13.1	23047	NM_015032	Q9NTI5	1			Regulator of sister chromatid cohesion in mitosis which may stabilize cohesin complex association with chromatin.		Cell Cycle, Mitotic
PRMT9	protein arginine methyltransferase 9	4q31.23	90826	NM_138364	Q6P2P2	1			Catalyze the formation of omega-N monomethylarginine and symmetrical dimethylarginine. Involved in the regulation of alternative splicing of pre-mRNA.	PubMed:25737013, PubMed:25979344	na
PRRC2C	proline rich coiled-coil 2C	1q24.3	23215	NM_015172	Q9Y520	1			Required for efficient formation of stress granules.		na
PYROXD1	pyridine nucleotide-disulphide oxidoreductase domain 1	12p12.1	79912	NM_024854	Q8WU10	1			Probable FAD-dependent oxidoreductase; involved in the cellular oxidative stress response.	PubMed:27745833	na
SLC22A10	solute carrier family 22 member 10	11q12.3	387775	NM_001039752	Q63ZE4	1					na
TIAM2	TIAM Rac1 associated GEF 2	6q25.2-q25.3	26230	NM_012454	Q8IVF5	1			Modulates the activity of RHO-like proteins and connects extracellular signals to cytoskeletal activities.		p75 NTR receptor-mediated signalling	Regulation of lipid metabolism by Peroxisome proliferator-activated receptor alpha (PPARalpha)
TTC6	tetratricopeptide repeat domain 6	14q21.1	319089	NM_001310135	Q86TZ1	1					na
TYRO3	TYRO3 protein tyrosine kinase	15q15.1	7301	NM_006293	Q06418	1	4		Transduces signals from the extracellular matrix into the cytoplasm by binding to several ligands. Regulates physiological processes.		GPCR Pathway	ERK Signaling
ADAMTS12	ADAM metallopeptidase with thrombospondin type 1 motif 12	5p13.3-p13.2	81792	NM_030955	P58397	2			May play a role in the degradation of COMP.		O-glycosylation of TSR domain-containing proteins
ADRA1A	adrenoceptor alpha 1A	8p21.2	148	NM_033303	P35348	2	4		Mediates its action by association with G proteins that activate a phosphatidylinositol-calcium second messenger system.		Peptide ligand-binding receptors	Activation of cAMP-Dependent PKA
ANKK1	ankyrin repeat and kinase domain containing 1	11q23.2	255239	NM_178510	Q8NFD2	2					Antipsychotics Pathway (Metabolic Side Effects), Pharmacodynamics
ANKRD53	ankyrin repeat domain 53	2p13.3	79998	NM_024933	Q8N9V6	2			Required for normal progression through mitosis.		na
ARHGEF10L	Rho guanine nucleotide exchange factor 10 like	1p36.13	55160	NM_018125	Q9HCE6	2			Acts as guanine nucleotide exchange factor (GEF) for RHOA, RHOB and RHOC.		p75 NTR receptor-mediated signalling	RET signaling
ATR	ATR serine/threonine kinase	3q23	545	NM_001184	Q13535	2			Activates checkpoint signaling upon genotoxic stresses, thereby acting as a DNA damage sensor.		DNA Double-Strand Break Repair	Homologous DNA Pairing and Strand Exchange	DNA Damage Response
ATRIP	ATR interacting protein	3p21.31	84126	NM_130384	Q8WXE1	2			Required for checkpoint signaling after DNA damage.		DNA Double-Strand Break Repair	Homologous DNA Pairing and Strand Exchange	Regulation of TP53 Activity
BLOC1S2	biogenesis of lysosomal organelles complex 1 subunit 2	10q24.31	282991	NM_173809	Q6QNY1	2			Component of the BLOC-1 complex, a complex that is required for normal biogenesis of lysosome-related organelles.		na
C2CD4A	C2 calcium dependent domain containing 4A	15q22.2	145741	NM_207322	Q8NCU7	2			May be involved in inflammatory process.		na
C6orf211/ARMT1	acidic residue methyltransferase 1	6q25.1	79624	NM_024573	Q9H993	2			Shows phosphatase activity against several substrates, including fructose-1-phosphate and fructose-6-phosphate.		na
CCDC11/CFAP53	cilia and flagella associated protein 53	18q21.1	220136	NM_145020	Q96M91	2			May play a role in the beating of primary cilia and thereby be involved in the establishment of organ laterality during embryogenesis.		na
CDS1	CDP-diacylglycerol synthase 1	4q21.23	1040	NM_001263	Q92903	2			Catalyzes the conversion of phosphatidic acid to CDP-diacylglycerol, invovled in the synthesis of phosphatidylglycerol, cardiolipin and phosphatidylinositol.	PubMed:9407135, PubMed:25375833	Glycerophospholipid biosynthesis
CEACAM1	CEA cell adhesion molecule 1	19q13.2	634	NM_001712	P13688	2		4	Mediates homophilic cell adhesion in a calcium-independent manner.		Innate Immune System	NF-kappaB Signaling
CEP104	centrosomal protein 104	1p36.32	9731	NM_014704	O60308	2			Required for ciliogenesis and for structural integrity at the ciliary tip.		na
CEP55	centrosomal protein 55	10q23.33	55165	NM_018131	Q53EZ4	2			Plays a role in mitotic exit and cytokinesis.	PubMed:16198290, PubMed:17853893	Cytoskeletal Signaling	DNA Damage
CLEC10A	C-type lectin domain containing 10A	17p13.1	10462	NM_006344	Q8IUN9	2		4	Probable role in regulating adaptive and innate immune responses.		Innate Immune System
CTBP1	C-terminal binding protein 1	4p16.3	1487	NM_001328	Q13363	2			Corepressor targeting diverse transcription regulators such as GLIS2 or BCL6.		Notch Signaling Pathway (WikiPathways)	Regulation of activated PAK-2p34 by proteasome mediated degradation
DARS2	aspartyl-tRNA synthetase 2, mitochondrial	1q25.1	55157	NM_018122	Q6PI48	2					tRNA Aminoacylation
DHFRL1/DHFR2	dihydrofolate reductase 2	3q11.2	200895	NM_176815	Q86XF0	2			Key enzyme in folate metabolism.		Metabolism of water-soluble vitamins and cofactors
DNAJC11	DnaJ heat shock protein family (Hsp40) member C11	1p36.31	55735	NM_018198	Q9NVH1	2			Required for mitochondrial inner membrane organization.		na
EGFR	epidermal growth factor receptor	7p11.2	1956	NM_005228	P00533	2			Receptor tyrosine kinase binding ligands of the EGF family and activating signaling cascades to convert extracellular cues into appropriate cellular responses.	PubMed:2790960, PubMed:10805725, PubMed:27153536	RET signaling	Apoptotic Pathways in Synovial Fibroblasts
EHHADH	enoyl-CoA hydratase and 3-hydroxyacyl CoA dehydrogenase	3q27.2	1962	NM_001966	Q08426	2		3	Catalyzes two of the four reactions of the long straight chain fatty acids peroxisomal beta-oxidation pathway.		Fatty Acyl-CoA Biosynthesis
EML5	EMAP like 5	14q31.3	161436	NM_183387	Q05BV3	2			May modify the assembly dynamics of microtubules.		na
EPHA10	EPH receptor A10	1p34.3	284656	NM_173641	Q5JZY3	2		3	Receptor for members of the ephrin-A family.		EPH-Ephrin signaling
FAM83B	family with sequence similarity 83 member B	6p12.1	222584	NM_001010872	Q5T0W9	2			Probable proto-oncogene that functions in the epidermal growth factor receptor/EGFR signaling pathway.		na
FIGNL1	fidgetin like 1	7p12.2	63979	NM_001042762	Q6PIW4	2			Involved in DNA double-strand break (DBS) repair. Recruited at DSB sites independently of BRCA2, RAD51 and RAD51 paralogs in a H2AX-dependent manner.		na
FRMPD1	FERM and PDZ domain containing 1	9p13.2	22844	NM_014907	Q5SYB0	2		3	Stabilizes membrane-bound GPSM1, and thereby promotes its interaction with GNAI1.		na
GINS4	GINS complex subunit 4	8p11.21	84296	NM_032336	Q9BRT9	2			The GINS complex plays an essential role in the initiation of DNA replication, and progression of DNA replication forks.		Regulation of activated PAK-2p34 by proteasome mediated degradation	Cell Cycle, Mitotic
GZMB	granzyme B	14q12	3002	NM_004131	P10144	2			Proteases which activates caspase-independent pyroptosis when delivered into the target cell through the immunological synapse.	PubMed:3262682, PubMed:3263427, PubMed:1985927	Allograft rejection	Apoptosis Modulation and Signaling
HCAR1	hydroxycarboxylic acid receptor 1	12q24.31	27198	NM_032554	Q9BXC0	2			Acts as a receptor for L-lactate and mediates its anti-lipolytic effect through a G(i)-protein-mediated pathway.		Peptide ligand-binding receptors
HTN1	histatin 1	4q13.3	3346	NM_002159	P15515	2			Major precursors of the protective proteinaceous structure on tooth surfaces.		Innate Immune System
IRAK4	interleukin 1 receptor associated kinase 4	12q12	51135	NM_016123	Q9NWZ3	2			Plays a critical role in initiating innate immune response against foreign pathogens.		Activated TLR4 signalling
KIF4B	kinesin family member 4B	5q33.2	285643	NM_001099293	Q2VIQ3	2		4	Iron-sulfur (Fe-S) cluster binding motor protein that has a role in chromosome segregation during mitosis.		Golgi-to-ER retrograde transport
LAMC3	laminin subunit gamma 3	9q34.12	10319	NM_006059	Q9Y6N6	2		3	Mediates the attachment, migration and organization of cells into tissues during embryonic development.		Integrin Pathway	ERK Signaling
MAK	male germ cell associated kinase	6p24.2	4117	NM_005906	P20794	2			Essential for the regulation of ciliary length. Plays a role in the transcriptional coactivation of the androgene receptor.		Coregulation of Androgen receptor activity
MARCO	macrophage receptor with collagenous structure	2q14.2	8685	NM_006770	Q9UEW3	2			Pattern recognition receptor (PRR) which binds Gram-positive and Gram-negative bacteria.	PubMed:9468508	Binding and Uptake of Ligands by Scavenger Receptors
MCM5	minichromosome maintenance complex component 5	22q12.3	4174	NM_006739	P33992	2			Part of the MCM2-7 complex which is the putative replicative helicase essential for 'once per cell cycle' DNA replication initiation and elongation.		Regulation of activated PAK-2p34 by proteasome mediated degradation	E2F mediated regulation of DNA replication
METTL2A	methyltransferase like 2A	17q23.2	339175	NM_181725	Q96IZ6	2			Mediates N(3)-methylcytidine modification of residue 32 of the tRNA anticodon loop of tRNA(Thr)(UGU) and tRNA(Arg)(CCU)		na
MMP27	matrix metallopeptidase 27	11q22.2	64066	NM_022122	Q9H306	2			Degrades protein components of the extracellular matrix such as fibronectin, laminin, gelatins and/or collagens		Matrix Metalloproteinases	Integrin Pathway
NTRK3	neurotrophic receptor tyrosine kinase 3	15q25.3	4916	NM_001012338	Q16288	2			Involved in nervous system and probably heart development		Apoptotic Pathways in Synovial Fibroblasts	ERK Signaling
PAK6	p21 (RAC1) activated kinase 6	15q15.1	56924	NM_001276717	Q9NQU5	2		5	Plays a role in the regulation of gene transcription		Integrin Pathway	ERK Signaling
PBXIP1	PBX homeobox interacting protein 1	1q21.3	57326	NM_020524	Q96AQ6	2			Regulator of pre-B-cell leukemia transcription factors (BPXs) function		na
PCBP4	poly(rC) binding protein 4	3p21.2	57060	NM_020418	P57723	2			Single-stranded nucleic acid binding protein that binds preferentially to oligo dC.		Regulation of activated PAK-2p34 by proteasome mediated degradation	Cell Cycle, Mitotic
PDCD11	programmed cell death 11	10q24.33	22984	NM_014976	Q14690	2			Essential for the generation of mature 18S rRNA, specifically necessary for cleavages at sites A0, 1 and 2 of the 47S precursor		rRNA processing in the nucleus and cytosol
PHAX	phosphorylated adaptor for RNA export	5q23.2	51808	NM_032177	Q9H814	2			involved in the XPO1-mediated U snRNA export from the nucleus		Transport of the SLBP independent Mature mRNA
PIK3CG	phosphatidylinositol-4,5-bisphosphate 3-kinase catalytic subunit gamma	7q22.3	5294	NM_002649	P48736	2			Phosphotylates PtdIns(4,5)P2 to generate PIP3 which pay a role by recruiting proteins to the membrane, including AKT1, activating signaling cascades.		Common Cytokine Receptor Gamma-Chain Family Signaling Pathways	Development Angiotensin activation of ERK
PINX1	PIN2 (TERF1) interacting telomerase inhibitor 1	8p23.1	54984	NM_017884	Q96BK5	2		4, 3	Microtubule-binding protein essential for faithful chromosome segregation. Inhibits telomerase activity		Regulation of Telomerase
PRKCG	protein kinase C gamma	19q13.42	5582	NM_002739	P05129	2			Plays diverse roles in neuronal cells and eye tissues.		DAG and IP3 signaling	RET signaling
PTK2B	protein tyrosine kinase 2 beta	8p21.2	2185	NM_004103	Q14289	2		5	Regulates reorganization of the actin cytoskeleton, cell polarization, cell migration, adhesion, spreading and bone remodeling.		ERK Signaling	Integrin Pathway
RAD1	RAD1 checkpoint DNA exonuclease	5p13.2	5810	NM_002853	O60671	2			Component of the 9-1-1 cell-cycle checkpoint response complex that plays a major role in DNA repair.	PubMed:10846170, PubMed:10884395	DNA Double-Strand Break Repair	Homologous DNA Pairing and Strand Exchange	Regulation of TP53 Activity
RASA2	RAS p21 protein activator 2	3q23	5922	NM_006506	Q15283	2			Inhibitory regulator of the Ras-cyclic AMP pathway.		RET signaling	MAPK signaling pathway
RASEF	RAS and EF-hand domain containing	9q21.32	158158	NM_152573	Q8IZ41	2			Acts as a dynein adapter protein that activates dynein-mediated transport and dynein-dynactin motility on microtubules.		na
RGS22	regulator of G protein signaling 22	8q22.2	26166	NM_015668	Q8NE09	2			Inhibits signal transduction by increasing the GTPase activity of G protein alpha subunits thereby driving them into their inactive GDP-bound form.		Signaling by GPCR
RNF181	ring finger protein 181	2p11.2	51255	NM_016494	Q9P0P0	2			E3 ubiquitin-protein ligase which directly transfers the ubiquitin to targeted substrates.		Protein ubiquitination
SH2D6	SH2 domain containing 6	2p11.2	284948	NM_198482	Q7Z4S9	2					na
SIRT3	sirtuin 3	11p15.5	23410	NM_012239	Q9NTG7	2			Activates or deactivates mitochondrial target proteins by deacetylating key lysine residues.	PubMed:12186850, PubMed:12374852, PubMed:16788062	NAD metabolism	p53 Signaling
SLC10A6	solute carrier family 10 member 6	4q21.3	345274	NM_197965	Q3KNW5	2		4	Transports sulfoconjugated steroid hormones, as well as taurolithocholic acid-3-sulfate and sulfoconjugated pyrenes in a sodium-dependent manner.		Transport of glucose and other sugars, bile salts and organic acids, metal ions and amine compounds
SLC22A13	solute carrier family 22 member 13	3p22.2	9390	NM_004256	Q9Y226	2					Metabolism of water-soluble vitamins and cofactors
SLX4	SLX4 structure-specific endonuclease subunit	16p13.3	84464	NM_032444	Q8IY92	2		4	Interacts with and increases the activity of different structure-specific endonucleases.		DNA Double-Strand Break Repair	Fanconi anemia pathway	Resolution of D-loop Structures through Holliday Junction Intermediates
SMARCA2	SWI/SNF related, matrix associated, actin dependent regulator of chromatin, subfamily a, member 2	9p24.3	6595	NM_003070	P51531	2		4	Involved in transcriptional activation and repression of select genes by chromatin remodeling.		AMPK Enzyme Complex Pathway	Transcription Ligand-dependent activation of the ESR1/SP pathway
SMARCAL1	SWI/SNF related, matrix associated, actin dependent regulator of chromatin, subfamily a like 1	2q35	50485	NM_001127207	Q9NZC9	2		3, 5	ATP-dependent annealing helicase that binds selectively to fork DNA relative to ssDNA or dsDNA and catalyzes the rewinding of the stably unwound DNA.		DNA Damage
SPATA21	spermatogenesis associated 21	1p36.13	374955	NM_198546	Q7Z572	2		4	Involved in the differentiation of haploid spermatids.		na
TAB1	TGF-beta activated kinase 1 (MAP3K7) binding protein 1	22q13.1	10454	NM_153497	Q15750	2			May be an important signaling intermediate between TGFB receptors and MAP3K7/TAK1.		Activated TLR4 signalling	Toll-Like receptor Signaling Pathways	IL-1 signaling pathway
TCF7L2	transcription factor 7 like 2	10q25.2-q25.3	6934	NM_030756	Q9NQB0	2			Participates in the Wnt signaling pathway and modulates MYC expression by binding to its promoter in a sequence-specific manner.		Regulation of activated PAK-2p34 by proteasome mediated degradation
TNC	tenascin C	9q33.1	3371	NM_002160	P24821	2		3	Extracellular matrix protein implicated in guidance of migrating neurons as well as axons during development, synaptic plasticity as well as neuronal regeneration.		Integrin Pathway	ERK Signaling
TP53TG5	TP53 target 5	20q13.12	27296	NM_014477	Q9Y2B4	2			May play a significant role in p53/TP53-mediating signaling pathway.		P38 MAPK Signaling Pathway (sino)
TRIM42	tripartite motif containing 42	3q23	287015	NM_152616	Q8IWZ5	2					na
UBE2U	ubiquitin conjugating enzyme E2 U	1p31.3	148581	NM_152489	Q5VVX9	2		3	Catalyzes the covalent attachment of ubiquitin to other proteins.		Class I MHC mediated antigen processing and presentation	Ubiquitin mediated proteolysis
ZFAND1	zinc finger AN1-type containing 1	8q21.13	79752	NM_024699	Q8TCF1	2			Plays a role in the regulation of cytoplasmic stress granules turnover		na
ABCC2	ATP binding cassette subfamily C member 2	10q24.2	1244	NM_000392	Q92887	3	4		binds and hydrolyzes ATP to enable active transport of various substrates including many drugs, toxicants and endogenous compound across cell membranes.		Statin Pathway - Generalized, Pharmacokinetics
ARL14EP	ADP ribosylation factor like GTPase 14 effector protein	11p14.1	120534	NM_152316	Q8N8R7	3			Through its interaction with ARL14 and MYO1E, may control the movement of these vesicles along the actin cytoskeleton in dendritic cells.		na
ASIP	agouti signaling protein	20q11.22	434	NM_001672	P42127	3			Involved in the regulation of melanogenesis.		Aldosterone synthesis and secretion
C4orf48	chromosome 4 open reading frame 48	4p16.3	401115	NM_001141936	Q5BLP8	3					na
C6orf57/SDHAF4	succinate dehydrogenase complex assembly factor 4	6q13	135154	NM_145267	Q5VUM1	3			Plays a role in the assembly of succinate dehydrogenase.	PubMed:24954416	na
CCDC7	coiled-coil domain containing 7	10p11.22	79741	NM_145023	Q96M83	3			May play a role in tumorigenesis.		na
CIDEB	cell death inducing DFFA like effector b	14q12	27141	NM_014430	Q9UHD4	3		2	Activates apoptosis.		na
CLCN2	chloride voltage-gated channel 2	3q27.1	1181	NM_004366	P51788	3			Several functions including the regulation of cell volume, membrane potential stabilization, signal transduction and transepithelial transport.		Activation of cAMP-Dependent PKA
DGAT2	diacylglycerol O-acyltransferase 2	11q13.5	84649	NM_032564	Q96PD7	3			Essential acyltransferase that catalyzes the terminal and only committed step in triacylglycerol synthesis by using diacylglycerol and fatty acyl CoA as substrates.		Glycerophospholipid biosynthesis
DLX6	distal-less homeobox 6	7q21.3	1750	NM_005222	P56179	3					MECP2 and Associated Rett Syndrome
DUOX2	dual oxidase 2	15q21.1	50506	NM_014080	Q9NRD8	3		4	Generates hydrogen peroxide which is required for the activity of thyroid peroxidase/TPO and lactoperoxidase/LPO.		Amine-derived hormones	Aldosterone synthesis and secretion
ENO3	enolase 3	17p13.2	2027	NM_053013	P13929	3			Appears to have a function in striated muscle development and regeneration.		Glucose metabolism
ERCC2	ERCC excision repair 2, TFIIH core complex helicase subunit	19q13.32	2068	NM_000400	P18074	3		2	Involved in general and transcription-coupled nucleotide excision repair of damaged DNA and, when complexed to CAK, in RNA transcription by RNA pol II.		RNA Polymerase II Transcription Initiation And Promoter Clearance	Transcription-Coupled Nucleotide Excision Repair (TC-NER)
KRT36	keratin 36	17q21.2	8689	NM_003771	O76013	3					Relaxin signaling pathway
KRT40	keratin 40	17q21.2	125115	NM_182497	Q6A162	3			May play a role in late hair differentiation.		Relaxin signaling pathway
MICAL1	microtubule associated monooxygenase, calponin and LIM domain containing 1	6q21	64780	NM_022765	Q8TDZ2	3			promotes depolymerization of F-actin by mediating oxidation of specific methionine residues on actin.		Glucose / Energy Metabolism
MYH7B	myosin heavy chain 7B	20q11.22	57644	NM_020884	A7E2Y1	3			Involved in muscle contraction.		PAK Pathway
NEK1	NIMA related kinase 1	4q33	4750	NM_001199397	Q96PY6	3			Possess tyrosine kinase activity. Involved in DNA damage checkpoint control and for proper DNA damage repair.	PubMed:20230784, PubMed:20230784	na
OPRM1	opioid receptor mu 1	6q25.2	4988	NM_000914	P35372	3			Receptor for endogenous opioids such as beta-endorphin and endomorphin.		Peptide ligand-binding receptors
OTOP1	otopetrin 1	4p16.3	133060	NM_177998	Q7RTM1	3			Proton-selective channel that specifically transports protons into cells.	PubMed:29371428	na
PCK2	phosphoenolpyruvate carboxykinase 2, mitochondrial	14q11.2-q12	5106	NM_001018073	Q16822	3			Catalyzes the conversion of oxaloacetate to phosphoenolpyruvate, the rate-limiting step in the metabolic pathway that produces glucose from lactate.		Glucose metabolism
PLD2	phospholipase D2	17p13.2	5338	NM_002663	O14939	3			Function as phospholipase selective for phosphatidylcholine.	PubMed:9582313	Glycerophospholipid biosynthesis
RNF175	ring finger protein 175	4q31.3	285533	NM_173662	Q8N4F7	3					na
SEC23B	SEC23 homolog B, COPII coat complex component	20p11.23	10483	NM_032986	Q15437	3			Promotes the formation of transport vesicles from the endoplasmic reticulum.		Delta508-CFTR traffic / ER-to-Golgi in CF
SLC2A8	solute carrier family 2 member 8	9q33.3	29988	NM_014580	Q9NY64	3			Mediates the transport of glucose and fructose.		Transport of glucose and other sugars, bile salts and organic acids, metal ions and amine compounds
TRIM63	tripartite motif containing 63	1p36.11	84676	NM_032588	Q969Q1	3			Mediates the ubiquitination and subsequent proteasomal degradation of CKM, GMEB1 and HIBADH.		Protein ubiquitination	Innate Immune System
TRPM1	transient receptor potential cation channel subfamily M member 1	15q13.3	4308	NM_002420	Q7Z4N2	3			Mediates the influx of Na(2+), Ca(2+), Mg(2+), Mn(2+), Ba(2+), and Ni(2+) into the cytoplasm, leading to membrane depolarization.	PubMed:19436059, PubMed:21278253	Ion channel transport	Transport of glucose and other sugars, bile salts and organic acids, metal ions and amine compounds
XDH	xanthine dehydrogenase	2p23.1	7498	NM_000379	P47989	3			Key enzyme in purine degradation.		Metabolism of nucleotides
ABCG2	ATP binding cassette subfamily G member 2 (Junior blood group)	4q22.1	9429	NM_004827	Q9UNQ0	4			Extrudes a wide variety of physiological compounds, dietary toxins and xenobiotics from cells.		Ponatinib Pathway, Pharmacokinetics/Pharmacodynamics
ADSSL1/ADSS1	adenylosuccinate synthase 1	14q32.33	122622	NM_199165	Q8N142	4			Interconverts IMP and AMP to regulate the nucleotide levels in various tissues, and which contributes to glycolysis and ammoniagenesis.		Alanine, aspartate and glutamate metabolism
AMFR	autocrine motility factor receptor	16q13	267	NM_001144	Q9UKV5	4			E3 ubiquitin-protein ligase that mediates the polyubiquitination of lysine and cysteine residues on target proteins.	PubMed:10456327, PubMed:11724934, PubMed:12670940	Calnexin/calreticulin cycle	Protein processing in endoplasmic reticulum
ATP2A1	ATPase sarcoplasmic/endoplasmic reticulum Ca2+ transporting 1	16p11.2	487	NM_004320	O14983	4		3	Acts as the major Ca(2+) ATPase responsible for the reuptake of cytosolic Ca(2+) into the sarcoplasmic reticulum.		Cardiac conduction	cGMP-PKG signaling pathway
AUNIP	aurora kinase A and ninein interacting protein	1p36.11	79000	NM_024037	Q9H7T9	4			DNA-binding protein that accumulates at DNA double-strand breaks following DNA damage and promotes DNA resection and homologous recombination.	PubMed:29042561	na
BAZ1B	bromodomain adjacent to zinc finger domain 1B	7q11.23	9031	NM_032408	Q9UIG0	4			Atypical tyrosine-protein kinase that plays a central role in chromatin remodeling and acts as a transcription regulator.		DNA Double Strand Break Response	DNA Double-Strand Break Repair
CDK11A	cyclin dependent kinase 11A	1p36.33	728642	NM_024011	Q9UQ88	4			Appears to play multiple roles in cell cycle progression, cytokinesis and apoptosis.		Cell Cycle, Mitotic	Regulation of PLK1 Activity at G2/M Transition
CLUH	clustered mitochondria homolog	17p13.3	23277	NM_015229	O75153	4			mRNA-binding protein involved in proper cytoplasmic distribution of mitochondria.		Translation Factors
COL5A2	collagen type V alpha 2 chain	2q32.2	1290	NM_000393	P05997	4			Type V collagen is a key determinant in the assembly of tissue-specific matrices.		Collagen chain trimerization	Integrin Pathway	ERK Signaling
EAF2	ELL associated factor 2	3q13.33	55840	NM_018456	Q96CJ1	4			Acts as a transcriptional transactivator of TCEA1 elongation activity.		Chromatin Regulation / Acetylation
EPN3	epsin 3	17q21.33	55040	NM_017957	Q9H201	4			In keratinocytes, by wounding or contact with collagen.		Sertoli-Sertoli Cell Junction Dynamics	Notch Signaling Pathway (WikiPathways)	Endocytic Trafficking of EGFR
ERCC4	ERCC excision repair 4, endonuclease catalytic subunit	16p13.12	2072	NM_005236	Q92889	4			Catalytic component of a structure-specific DNA repair endonuclease responsible for the 5-prime incision during DNA repair.		Transcription-Coupled Nucleotide Excision Repair (TC-NER)	DNA Double-Strand Break Repair	Nucleotide excision repair
FANCA	FA complementation group A	16q24.3	2175	NM_001018112	O15360	4		2	DNA repair protein that may operate in a postreplication repair or a cell cycle checkpoint function.		Fanconi anemia pathway	BRCA1 Pathway	DNA Damage
FANCD2OS	FANCD2 opposite strand	3p25.3	115795	NM_173472	Q96PS1	4					na
FARP2	FERM, ARH/RhoGEF and pleckstrin domain protein 2	2q37.3	9855	NM_014808	O94887	4		3, 5	Functions as guanine nucleotide exchange factor that activates RAC1.		Development Endothelin-1/EDNRA signaling
FHL3	four and a half LIM domains 3	1p34.3	2275	NM_004468	Q13643	4		3	Recruited by SOX15 to FOXK1 promoters where it acts as a transcriptional coactivator of FOXK1.		na
FOXM1	forkhead box M1	12p13.33	2305	NM_021953	Q08050	4			Transcriptional factor regulating the expression of cell cycle genes essential for DNA replication and mitosis.		Regulation of PLK1 Activity at G2/M Transition	Cell Cycle, Mitotic	DNA Damage
GNE	glucosamine (UDP-N-acetyl)-2-epimerase/N-acetylmannosamine kinase	9p13.3	10020	NM_005476	Q9Y223	4			Regulates and initiates biosynthesis of N-acetylneuraminic acid (NeuAc), a precursor of sialic acids.		Synthesis of substrates in N-glycan biosythesis	Amino sugar and nucleotide sugar metabolism
GOLGA8B	golgin A8 family member B	15q14	440270	NM_001023567	A8MQT2	4	2		May be involved in maintaining Golgi structure.		na
GRM3	glutamate metabotropic receptor 3	7q21.11-q21.12	2913	NM_000840	Q14832	4			G-protein coupled receptor for glutamate.		Peptide ligand-binding receptors	Signaling by GPCR
GRM6	glutamate metabotropic receptor 6	5q35.3	2916	NM_000843	O15303	4			G-protein coupled receptor for glutamate.		Peptide ligand-binding receptors
GSG2/HASPIN	histone H3 associated protein kinase	17p13.2	83903	NM_031965	Q8TF76	4	5		Serine/threonine-protein kinase that phosphorylates histone H3 at 'Thr-3' (H3T3ph) during mitosis.		na
IQGAP2	IQ motif containing GTPase activating protein 2	5q13.3	10788	NM_006633	Q13576	4		5	Binds to activated CDC42 and RAC1 but does not seem to stimulate their GTPase activity.		Innate Immune System
ITGA10	integrin subunit alpha 10	1q21.1	8515	NM_003637	O75578	4			Receptor for collagen.		Apoptotic Pathways in Synovial Fibroblasts	Integrin Pathway	ERK Signaling
KIF18A	kinesin family member 18A	11p14.1	81930	NM_031217	Q8NI77	4			Plays a role in chromosome congression.		Golgi-to-ER retrograde transport	Cell Cycle, Mitotic
LDHD	lactate dehydrogenase D	16q23.1	197257	NM_153486	Q86WU2	4		3	Involved in D-lactate, but not L-lactate catabolic process.		Pyruvate metabolism
LIPC	lipase C, hepatic type	15q21.3	3990	NM_000236	P11150	4			Catalyzes the hydrolysis of triglycerides and phospholipids present in circulating plasma lipoproteins.		Lipoprotein metabolism
LRIG3	leucine rich repeats and immunoglobulin like domains 3	12q14.1	121227	NM_153377	Q6UXM1	4			May play a role in craniofacial and inner ear morphogenesis during embryonic development.		na
MAGI1	membrane associated guanylate kinase, WW and PDZ domain containing 1	3p14.1	9223	NM_004742	Q96QZ7	4			May play a role as scaffolding protein at cell-cell junctions.		PI3K-Akt signaling pathway	Ras signaling pathway	Sertoli-Sertoli Cell Junction Dynamics
MST1L	macrophage stimulating 1 like	1p36.13	11223	NM_001271733	Q2TV78	4					na
MTMR11	myotubularin related protein 11	1q21.2	10903	NM_181873	A4FU01	4					na
NCKAP1L	NCK associated protein 1 like	12q13.13-q13.2	3071	NM_005337	P55160	4			Controls lymphocyte development, activation, proliferation and homeostasis, erythrocyte membrane stability, phagocytosis.	PubMed:16417406, PubMed:17696648	Regulation of actin dynamics for phagocytic cup formation	Innate Immune System	RET signaling
NR3C2	nuclear receptor subfamily 3 group C member 2	4q31	0	NM_000901	P08235	4			Binds to mineralocorticoid response elements (MRE) and transactivates target genes.		Agents Acting on the Renin-Angiotensin System Pathway, Pharmacodynamics
OR4F17	olfactory receptor family 4 subfamily F member 17	19p13.3	81099	NM_001005240	Q8NGA8	4			Odorant receptor.		Signaling by GPCR	Olfactory transduction
PARP2	poly(ADP-ribose) polymerase 2	14q11.2	10038	NM_001042618	Q9UGN5	4			Mediates poly-ADP-ribosylation of proteins and plays a key role in DNA repair.	PubMed:10364231, PubMed:25043379, PubMed:27471034	Telomere C-strand (Lagging Strand) Synthesis	Transcription-Coupled Nucleotide Excision Repair (TC-NER)	DNA Double-Strand Break Repair
POLR3A	RNA polymerase III subunit A	10q22.3	11128	NM_007055	O14802	4			DNA-dependent RNA polymerase catalyzes the transcription of DNA into RNA using the four ribonucleoside triphosphates as substrates.		RNA Polymerase III Transcription Initiation	Cytosolic sensors of pathogen-associated DNA	Innate Immune System
PTCH1	patched 1	9q22.32	5727	NM_000264	Q13635	4		2	Seems to have a tumor suppressor function, as inactivation of this protein is probably a necessary, if not sufficient step for tumorigenesis.		Activation of cAMP-Dependent PKA
RIC1	RIC1 homolog, RAB6A GEF complex partner 1	9p24.1	57589	NM_020829	Q4ADV7	4			The RIC1-RGP1 complex acts as a guanine nucleotide exchange factor, which activates RAB6A by exchanging bound GDP for free GTP.		Vesicle-mediated transport	Golgi-to-ER retrograde transport
SCN7A	sodium voltage-gated channel alpha subunit 7	2q24.3	6332	NM_002976	Q01118	4			Mediates the voltage-dependent sodium ion permeability of excitable membranes.		Activation of cAMP-Dependent PKA
SERPINF1	serpin family F member 1	17p13.3	5176	NM_002615	P36955	4			Induces extensive neuronal differentiation in retinoblastoma cells		Wnt signaling pathway	Apoptotic Pathways in Synovial Fibroblasts
SGSM3	small G protein signaling modulator 3	22q13.1	27352	NM_015705	Q96HU1	4			May play a cooperative role in NF2-mediated growth suppression of cells.		Ectoderm Differentiation
SIPA1L1	signal induced proliferation associated 1 like 1	14q24.2	26037	NM_015556	O43166	4		5	Stimulates the GTPase activity of RAP2A.		Protein-protein interactions at synapses	Ras signaling pathway
SLC22A5	solute carrier family 22 member 5	5q31.1	6584	NM_003060	O76082	4		3	Involved in the active cellular uptake of carnitine.		Transport of glucose and other sugars, bile salts and organic acids, metal ions and amine compounds	Phospholipase D signaling pathway
SLC4A7	solute carrier family 4 member 7	3p24.1	9497	NM_003615	Q9Y6M7	4			Regulates intracellular pH and may play a role in bicarbonate salvage in secretory epithelia.		Transport of glucose and other sugars, bile salts and organic acids, metal ions and amine compounds
SLC4A8	solute carrier family 4 member 8	12q13.13	9498	NM_001039960	Q2Y0W8	4			Plays a major role in pH regulation in neurons.		Transport of glucose and other sugars, bile salts and organic acids, metal ions and amine compounds
SLC4A9	solute carrier family 4 member 9	5q31.3	83697	NM_031467	Q96Q91	4		3	Probable apical anion exchanger of the kidney cortex.		Transport of glucose and other sugars, bile salts and organic acids, metal ions and amine compounds
SUPT3H	SPT3 homolog, SAGA and STAGA complex component	6p21.1	8464	NM_181356	O75486	4		2	Probable transcriptional activator.		Chromatin organization	C-MYC pathway
SUPT6H	SPT6 homolog, histone chaperone and transcription elongation factor	17q11.2	6830	NM_003170	Q7KZ85	4		5	Binds histone H3 and plays a key role in the regulation of transcription elongation and mRNA processing.		Chromatin Regulation / Acetylation
TCF7	transcription factor 7	5q31.1	6932	NM_201634	P36402	4			Transcriptional activator involved in T-cell lymphocyte differentiation.		Regulation of activated PAK-2p34 by proteasome mediated degradation
TMEM206/PACC1	proton activated chloride channel 1	1q32.3	55248	NM_018252	Q9H813	4			Mediates import of chloride ion in response to extracellular acidic pH.		na
TRIO	trio Rho guanine nucleotide exchange factor	5p15.2	7204	NM_007118	O75962	4			Involved in coordinating actin remodeling, which is necessary for cell migration and growth.	PubMed:10341202, PubMed:22155786	p75 NTR receptor-mediated signalling	RET signaling
TSEN2	tRNA splicing endonuclease subunit 2	3p25.2	80746	NM_025265	Q8NCE0	4		3	Part of the tRNA-splicing endonuclease complex, a complex responsible for identification and cleavage of the splice sites in pre-tRNA.		tRNA processing
UVSSA	UV stimulated scaffold protein A	4p16.3	57654	NM_020894	Q2YD98	4	2		Factor involved in transcription-coupled nucleotide excision repair in response to UV damage.		Transcription-Coupled Nucleotide Excision Repair (TC-NER)	DNA Double-Strand Break Repair
ZBTB39	zinc finger and BTB domain containing 39	12q13.3	9880	NM_014830	O15060	4			May be involved in transcriptional regulation.		na
ZWINT	ZW10 interacting kinetochore protein	10q21.1	0	NM_007057	O95229	4	2		Part of the MIS12 complex, which is required for kinetochore formation and spindle checkpoint activity.		Cell Cycle, Mitotic
E4F1	E4F transcription factor 1	16p13.3	1877	NM_004424	Q66K89	5			May function as a transcriptional repressor.		p53 pathway
EPS8L2	EPS8 like 2	11p15.5	64787	NM_022772	Q9H6S3	5			May play a role in membrane ruffling and remodeling of the actin cytoskeleton.		na
FGFR3	fibroblast growth factor receptor 3	4p16.3	2261	NM_000142	P22607	5		2	Acts as cell-surface receptor for fibroblast growth factors and plays an essential role in the regulation of cell proliferation, differentiation and apoptosis.		RET signaling	Apoptotic Pathways in Synovial Fibroblasts	GPCR Pathway
HIST1H4E/H4C5	H4 clustered histone 5	6p22.2	8367	NM_003545	P62805	5			Core component of nucleosome.		Activated PKN1 stimulates transcription of AR (androgen receptor) regulated genes KLK2 and KLK3	DNA Double-Strand Break Repair
INPP5D	inositol polyphosphate-5-phosphatase D	2q37.1	3635	NM_001017915	Q92835	5			Hydrolyzes the PtdIns(3,4,5)P3 to produce PtdIns(3,4)P2, thereby negatively regulating the PI3K (phosphoinositide 3-kinase) pathways.		Inositol phosphate metabolism	RET signaling
MAP1S	microtubule associated protein 1S	19p13.12	55201	NM_018174	Q66K74	5			Mediates aggregation of mitochondria resulting in cell death and genomic destruction.		na
MAPT	microtubule associated protein tau	17q21.31	4137	NM_016835	P10636	5			Promotes microtubule assembly and stability, and might be involved in the establishment and maintenance of neuronal polarity.	PubMed:21985311	Apoptotic execution phase	MAPK signaling pathway
PHF2	PHD finger protein 2	9q22.31	5253	NM_005392	O75151	5			Demethylates both histones and non-histone proteins.		Chromatin organization	Activated PKN1 stimulates transcription of AR (androgen receptor) regulated genes KLK2 and KLK3
PHRF1	PHD and ring finger domains 1	11p15.5	57661	NM_020901	Q9P1Y6	5					na
TARDBP	TAR DNA binding protein	1p36.22	23435	NM_007375	Q13148	5			involved in various steps of RNA biogenesis and processing.	PubMed:23519609	Neuroscience
TNK1	tyrosine kinase non receptor 1	17p13.1	8711	NM_003985	Q13470	5		2	Involved in negative regulation of cell growth. Has tumor suppressor properties.		Tyrosine Kinases / Adaptors
TXLNA	taxilin alpha	1p35.2	200081	NM_175852	P40222	5			May be involved in intracellular vesicle traffic and potentially in calcium-dependent exocytosis in neuroendocrine cells.		Cytokine Signaling in Immune system	Innate Immune System
USP5	ubiquitin specific peptidase 5	12p13	0	NM_001098536	P45974	5			Cleaves linear and branched multiubiquitin polymers with a marked preference for branched polymers.		Deubiquitination	Protein ubiquitination
WRNIP1	WRN helicase interacting protein 1	6p25.2	56897	NM_130395	Q96S55	5			Functions as a modulator of initiation or reinitiation events during DNA polymerase delta-mediated DNA synthesis.		na
BLM	BLM RecQ like helicase	15q26.1	641	NM_000057	P54132			5, 4, 2	ATP-dependent DNA helicase that unwinds single- and double-stranded DNA in a 3'-5' direction.	PubMed:9388193, PubMed:24816114, PubMed:25901030	DNA Double-Strand Break Repair	Resolution of D-loop Structures through Holliday Junction Intermediates	Homologous DNA Pairing and Strand Exchange
EEFSEC	eukaryotic elongation factor, selenocysteine-tRNA specific	3q21.3	60678	NM_021937	P57772			3, 4, 2	Translation factor necessary for the incorporation of selenocysteine into proteins.		Viral mRNA Translation
NADSYN1	NAD synthetase 1	11q13.4	55191	NM_018161	Q6IA69			3, 5, 4	Catalyzes the final step of the nicotinamide adenine dinucleotide (NAD) de novo synthesis pathway.		superpathway of tryptophan utilization	NAD metabolism
SERPINB10	serpin family B member 10	18q21.3	5273	NM_005024	P48595			3, 4, 2	Protease inhibitor that may play a role in the regulation of protease activities during hematopoiesis and apoptosis induced by TNF.		Innate Immune System
TRPM4	transient receptor potential cation channel subfamily M member 4	19q13.33	54795	NM_017636	Q8TD43			3, 5, 4	Mediates membrane depolarization.	PubMed:12015988, PubMed:29211723, PubMed:30528822	Ion channel transport	Aldosterone synthesis and secretion
PTPRN	protein tyrosine phosphatase receptor type N	2q35	5798	NM_002846	Q16849	additional putative BC gene			Plays a role in vesicle-mediated secretory processes.	PubMed:24843546	PAK Pathway
TMEM161A	transmembrane protein 161A	19p13.11	54929	NM_017814	Q9NX61	additional putative BC gene			May play a role in protection against oxidative stress.		na
NUDT1	nudix hydrolase 1	7p22.3	4521	NM_002452	P36639	additional putative BC gene			Antimutagenic. Plays a redundant role in sanitizing oxidized nucleotide pools.	PubMed:8226881, PubMed:7713500, PubMed:10608900, PubMed:28679043	Metabolism of nucleotides	DNA Damage
NLRP12	NLR family pyrin domain containing 12	19q13.42	91662	NM_144687	P59046	additional putative BC gene			Plays an essential role as an potent mitigator of inflammation.	PubMed:30559449	NOD-like receptor signaling pathway	Toll-Like receptor Signaling Pathways	Nucleotide-binding Oligomerization Domain (NOD) pathway
DKKL1	dickkopf like acrosomal protein 1	19q13.33	27120	NM_014419	Q9UK85	additional putative BC gene		3	Involved in fertilization by facilitating sperm penetration of the zona pellucida.		na
* The order of the genes is according to the classification by strategy
**According to SuperPaths from PathCards
