# Supplementary material for: Uncovering the Contribution of Moderate-Penetrance Susceptibility Genes to Breast Cancer by Whole-Exome Sequencing and Targeted Enrichment Sequencing of Candidate Genes in Women of European Ancestry
Source: Cancers (Basel). 2022 Jul 11;14(14):3363. doi: 10.3390/cancers14143363 (PMC9317824; doi:10.3390/cancers14143363)
Supplement: Supplementary file 1 [file cancers-14-03363-s001.zip › Table S3-final_16052022.xlsx]

## Sheet: Table S3A
List of loss of function variants identifed at the validation stage
Gene symbol	CHROM	POSITION (GRCh37)	REF	ALT	Func_Type	Func_Detail				gnomAD	AF gnomAD (Total)	MaxAF*	BayesDel	All.carrier.cs	All.carrier.ct
						CDS coding region	Nucleotide change		Protein change
ABCC2	10	101553757	G	A	SpliceSite	NM_000392	c.576+1G>A			rs376398719	1.77566e-05	3.6e-05	0.292475	1	0
ABCC2	10	101554176	TCATCCAT	T	StopGain	NM_000392	c.584_590delCATCCAT	c.578_584delATCCATC	p.S195_F1545del			0	0.52058	0	0
ABCC2	10	101556918	A	AA	Frameshift	NM_000392	c.697_698insA	c.696_697insA				9e-06	-0.0502799	1	0
ABCC2	10	101558985	AA	A	Frameshift	NM_000392	c.890delA	c.883delA				0	0.555388	0	1
ABCC2	10	101558992	CT	C	Frameshift	NM_000392	c.897delT					0	-0.00850966	1	0
ABCC2	10	101563856	GC	G	Frameshift	NM_000392	c.1291delC			rs1208873596	3.97994e-06	9e-06	0.492733	1	0
ABCC2	10	101565138	G	C	SpliceSite	NM_000392	c.1465-1G>C			rs763285356	7.96476e-06	2.7e-05	0.156033	2	0
ABCC2	10	101567139	A	G	SpliceSite	NM_000392	c.1531-2A>G			rs753329079	2.39114e-05	5.4e-05	0.188948	1	0
ABCC2	10	101577064	G	A	SpliceSite	NM_000392	c.2095-1G>A					0	0.31869	0	1
ABCC2	10	101578599	CC	C	Frameshift	NM_000392	c.2325delC	c.2324delC				0	0.52058	1	0
ABCC2	10	101578634	CCCCTGTC	C	Frameshift	NM_000392	c.2360_2366delCCCTGTC	c.2359_2365delCCCCTGT				0	0.555388	1	0
ABCC2	10	101590472	G	T	SpliceSite	NM_000392	c.2748-1G>T			rs781545154	1.06077e-05	1.8e-05	0.196522	1	0
ABCC2	10	101591826	C	T	StopGain	NM_000392	c.3196C>T		p.R1066*	rs72558199	0.000413585	0.00066	0.113112	13	8
ABCC2	10	101591889	G	A	SpliceSite	NM_000392	c.3258+1G>A			rs762243203	7.42411e-05	0.00012	0.217257	0	1
ABCC2	10	101601851	G	T	SpliceSite	NM_000392	c.3741+1G>T			rs34937870	4.59565e-05	0.00011	0.308014	2	2
ABCC2	10	101604087	G	A	StopGain	NM_000392	c.3852G>A		p.W1284*			0	0.583235	0	1
ABCC2	10	101604201	T	A	StopGain	NM_000392	c.3966T>A		p.C1322*			0	0.534503	0	1
ABCC2	10	101606832	AG	A	Frameshift	NM_000392	c.4262delG					0	-0.00850966	0	1
ABCC2	10	101610551	CAAGT	C	SpliceSite	NM_000392	c.4507_4508+2delAAGT			rs758461922	5.57232e-05	0.0003	0.31053	1	0
ABCG2	4	89015728	C	T	SpliceSite	NM_004827	c.1820+1G>A					0.00035	0.0410106	1	0
ABCG2	4	89016671	C	A	SpliceSite	NM_004827	c.1737+1G>T					9e-06	0.311729	1	0
ABCG2	4	89016686	G	A	StopGain	NM_004827	c.1723C>T		p.R575*			0.00087	0.331997	0	1
ABCG2	4	89020474	A	G	SpliceSite	NM_004827	c.1492+2T>C					0	0.311729	0	0
ABCG2	4	89020584	C	A	StopGain	NM_004827	c.1384G>T		p.G462*			9.2e-06	0.625005	1	0
ABCG2	4	89022417	GGCTGAAACACT	G	Frameshift	NM_004827	c.1321_1331delAGTGTTTCAGC	c.1309_1319delCAGTGTTTCAG				5.8e-05	0.500301	1	0
ABCG2	4	89036105	ATA	A	Intronic	NM_004827	c.943+2_943+3delTA	c.943+5_943+6delAT				3.6e-05	0.160202	1	0
ABCG2	4	89039309	TAA	T	Frameshift	NM_004827	c.791_792delTT					0.00033	0.0290998	1	0
ABCG2	4	89039366	G	A	StopGain	NM_004827	c.736C>T		p.R246*			0.00033	0.411993	2	2
ABCG2	4	89039396	G	A	StopGain	NM_004827	c.706C>T		p.R236*			0.00053	0.273482	7	2
ABCG2	4	89052212	C	T	SpliceSite	NM_004827	c.531+1G>A					1.8e-05	0.461067	1	0
ABCG2	4	89052270	GT	G	Frameshift	NM_004827	c.473delA	c.467delA				0	0.60412	0	1
ABCG2	4	89052954	C	T	SpliceSite	NM_004827	c.378+1G>A					9e-06	0.457924	1	0
ABCG2	4	89053727	C	A	SpliceSite	NM_004827	c.263+1G>T					3.2e-05	0.362651	0	1
ABCG2	4	89060950	ATTCGATAATAT	A	Frameshift	NM_004827	c.187_197delATATTATCGAA	c.184_194delGAAATATTATC				0.0009	0.329244	0	1
ABCG2	4	89060982	G	A	StopGain	NM_004827	c.166C>T		p.R56*			3.3e-05	0.485332	0	1
ABCG2	4	89061015	G	A	StopGain	NM_004827	c.133C>T		p.R45*			3.2e-05	0.474038	1	0
ADAMTS12	5	33534936	A	AA	Intronic	NM_030955	c.4606+1_4606+2insT	c.4606+2_4606+3insT				2.7e-05	0.580697	0	2
ADAMTS12	5	33549310	A	G	SpliceSite	NM_030955	c.4302+2T>C					0.00012	0.467878	1	1
ADAMTS12	5	33549490	T	C	SpliceSite	NM_030955	c.4126-2A>G					0	0.625005	1	0
ADAMTS12	5	33561130	A	T	SpliceSite	NM_030955	c.4125+2T>A					0	0.625005	1	0
ADAMTS12	5	33576501	C	T	StopGain	NM_030955	c.3630G>A		p.W1210*			0	0.625005	0	1
ADAMTS12	5	33577169	G	A	StopGain	NM_030955	c.2962C>T		p.R988*			0.00024	0.420688	1	0
ADAMTS12	5	33616160	GC	G	Frameshift	NM_030955	c.2160delG	c.2158delG				0	0.625005	1	0
ADAMTS12	5	33630995	G	A	StopGain	NM_030955	c.1912C>T		p.R638*			3.6e-05	0.550057	1	0
ADAMTS12	5	33643482	C	A	SpliceSite	NM_030955	c.1572+1G>T					0	0.625005	0	1
ADAMTS12	5	33649070	G	A	StopGain	NM_030955	c.1336C>T		p.R446*			6.5e-05	0.498631	0	1
ADAMTS12	5	33658377	C	A	StopGain	NM_030955	c.1102G>T		p.G368*			0	0.625005	1	0
ADAMTS12	5	33881538	G	A	StopGain	NM_030955	c.175C>T		p.R59*			0	0.625005	1	0
ADAMTS12	5	33881585	TCT	T	Intronic	NM_030955	c.128-2_128-1delAG	c.128_129delAG				0.00054	0.383315	0	3
ADRA1A	8	26628027	CAG	C	Frameshift	NM_000680	c.1038_1039delCT	c.1035_1036delTC				0.00047	0.178019	4	7
ADRA1A	8	26721603	C	G	SpliceSite	NM_000680	c.883+1G>C					0.0008	0.066699	1	3
ADRA1A	8	26721722	CG	C	Frameshift	NM_000680	c.764delC					0	0.158571	0	1
ADRA1A	8	26721767	G	GT	Frameshift	NM_000680	c.719_720insA	c.714_715insA				0	-0.00850966	1	0
ADRA1A	8	26722074	ACGATGGTTGGGTAG	A	Frameshift	NM_000680	c.399_412delCTACCCAACCATCG	c.397_410delCGCTACCCAACCAT				9e-06	0.527541	1	0
ADRA1A	8	26722298	G	GT	StopGain	NM_000680	c.188_189insA	c.187_188insA	p.Y63_V466del			7.2e-05	0.412044	1	0
ADSSL1	14	105190674	CAGCAGGAGGCGGCGGC	C	Frameshift	NM_152328	c.68_83delAGCAGGAGGCGGCGGC	c.66_81delGCAGCAGGAGGCGGCG				0	0.625005	1	0
ADSSL1	14	105190801	T	G	SpliceSite	NM_152328	c.192+2T>G					0	0.625005	1	1
ADSSL1	14	105201354	CA	C	Intronic	NM_152328	c.193-2delA					0.00015	0.44745	0	1
ADSSL1	14	105207484	C	T	StopGain	NM_152328	c.697C>T		p.R233*			6e-05	0.502586	1	0
ADSSL1	14	105207528	C	CC	Frameshift	NM_152328	c.741_742insC	c.734_735insC				0	0.625005	0	0
ADSSL1	14	105209422	C	T	StopGain	NM_152328	c.967C>T		p.Q323*			5.4e-05	0.516148	2	3
ADSSL1	14	105212723	G	A	SpliceSite	NM_152328	c.1321+1G>A					4.5e-05	0.534189	0	1
AKT1	14	105239391	C	T	StopGain	NM_005163	c.996G>A		p.W332*			0	0.625005	1	0
AKT1	14	105242035	CCT	C	StopGain	NM_005163	c.387_388delAG		p.G130_A480delinsG			0	0.625005	0	1
AMFR	16	56397861	T	TA	StopGain	NM_001144	c.1755_1756insT	c.1754_1755insT	p.K586_S643del			0	0.625005	1	1
AMFR	16	56435693	T	TC	Frameshift	NM_001144	c.1036_1037insG	c.1033_1034insG				0	0.625005	1	0
ANKK1	11	113264469	T	TCCTCCTGG	Frameshift	NM_178510	c.452_453insCCTCCTGG					0	0.262997	0	1
ANKK1	11	113264471	C	CAGCAACATGCATGTCAAAGTAAGGGCCGGGCAACATCC	Frameshift	NM_178510	c.454_455insAGCAACATGCATGTCAAAGTAAGGGCCGGGCAACATCC	c.453_454insCAGCAACATGCATGTCAAAGTAAGGGCCGGGCAACATC				0	0.36046	0	1
ANKK1	11	113265649	A	T	SpliceSite	NM_178510	c.481-2A>T					0.00087	-0.169246	0	2
ANKK1	11	113266815	C	T	StopGain	NM_178510	c.709C>T		p.R237*			0.001	0.0829308	15	7
ANKK1	11	113266834	GG	G	Frameshift	NM_178510	c.729delG	c.728delG				0	0.102878	0	1
ANKRD53	2	71206971	A	T	StopGain	NM_024933	c.598A>T		p.K200*			0.00036	0.40187	0	1
ANKRD53	2	71209712	T	TA	Frameshift	NM_024933	c.788_789insA					0	0.618043	1	0
ANKRD53	2	71209818	TGAGT	T	Frameshift	NM_024933	c.895_898delGAGT	c.894_897delTGAG				9e-06	0.618043	1	0
ANKRD53	2	71211288	TT	T	Frameshift	NM_024933	c.940delT	c.937delT				0	0.618043	1	0
ANKRD53	2	71211381	T	C	SpliceSite	NM_024933	c.1030+2T>C					0.0021	0.298833	0	0
ARHGEF10L	1	17907115	C	T	StopGain	NM_018125	c.25C>T		p.Q9*			0	0.625005	1	0
ARHGEF10L	1	17939588	C	G	StopGain	NM_018125	c.645C>G		p.Y215*			1.8e-05	0.614224	0	1
ARHGEF10L	1	17964498	GG	G	Intronic	NM_018125	c.2043+1delG	c.2043delG				0	0.625005	1	0
ARHGEF10L	1	17964499	GTACGTGGCCTGG	G	Intronic	NM_018125	c.2043+2_2043+13delTACGTGGCCTGG	c.2043_2043+11delGGTACGTGGCCT				0	0.625005	0	1
ARHGEF10L	1	17981197	C	CC	Frameshift	NM_018125	c.2461_2462insC	c.2458_2459insC				0	0.625005	0	1
ARHGEF10L	1	18014070	AA	A	Frameshift	NM_018125	c.3013delA	c.3011delA				0	0.625005	1	0
ATM	11	108098393	AC	A	StopGain	NM_000051	c.43delC		p.L15_V3056del			3e-05	0.281887	1	0
ATM	11	108098567	ATTCA	A	Frameshift	NM_000051	c.138_141delTTCA	c.136_139delCATT				0	0.60412	0	1
ATM	11	108106445	CA	C	StopGain	NM_000051	c.381delA		p.T127_V3056delinsT			9e-06	0.130724	1	0
ATM	11	108114784	C	T	StopGain	NM_000051	c.601C>T		p.Q201*			0	0.618043	1	0
ATM	11	108115600	C	T	StopGain	NM_000051	c.748C>T		p.R250*			3e-05	0.525547	1	0
ATM	11	108115641	TT	T	Frameshift	NM_000051	c.790delT	c.788delT				1.8e-05	0.377526	1	0
ATM	11	108115675	TT	T	StopGain	NM_000051	c.824delT	c.822delT	p.L275_V3056del			1.8e-05	0.607262	2	0
ATM	11	108117714	A	T	StopGain	NM_000051	c.925A>T		p.R309*			0	0.569311	1	0
ATM	11	108117815	AGAAA	A	Frameshift	NM_000051	c.1027_1030delGAAA	c.1024_1027delAAAG				1.8e-05	0.614224	0	1
ATM	11	108119772	GGG	G	StopGain	NM_000051	c.1179_1180delGG	c.1178_1179delGG	p.W393_V3056del			0	0.618043	0	1
ATM	11	108119830	G	A	SpliceSite	NM_000051	c.1235+1G>A					0	0.409192	1	0
ATM	11	108121425	TAGGCTACAGA	T	SpliceSite	NM_000051	c.1236-2_1243delAGGCTACAGA					1.8e-05	0.614224	4	2
ATM	11	108121513	C	T	StopGain	NM_000051	c.1321C>T		p.Q441*			0	0.625005	0	1
ATM	11	108121531	C	T	StopGain	NM_000051	c.1339C>T		p.R447*			6.5e-05	0.477746	0	0
ATM	11	108121540	G	T	StopGain	NM_000051	c.1348G>T		p.E450*			0	0.618043	1	0
ATM	11	108121546	AC	A	Frameshift	NM_000051	c.1355delC					0	-0.0642033	1	0
ATM	11	108121593	CAA	C	Frameshift	NM_000051	c.1402_1403delAA					0.00023	0.338079	1	0
ATM	11	108121755	AGA	A	Frameshift	NM_000051	c.1564_1565delGA	c.1561_1562delAG				9.9e-05	0.482603	9	1
ATM	11	108122693	G	A	StopGain	NM_000051	c.1737G>A		p.W579*			0	0.618043	1	0
ATM	11	108123641	T	G	SpliceSite	NM_000051	c.1898+2T>G					9e-06	0.395269	2	0
ATM	11	108124665	C	T	StopGain	NM_000051	c.2023C>T		p.Q675*			2.7e-05	0.239573	1	0
ATM	11	108124763	TG	T	Frameshift	NM_000051	c.2122delG					0	0.583235	0	1
ATM	11	108128222	T	A	StopGain	NM_000051	c.2265T>A		p.C755*			0	0.576273	1	0
ATM	11	108129749	C	T	StopGain	NM_000051	c.2413C>T		p.R805*			0.00035	0.361249	1	0
ATM	11	108137933	A	AA	Frameshift	NM_000051	c.2502_2503insA	c.2500_2501insA				9e-06	-0.0850884	1	0
ATM	11	108138005	T	TT	StopGain	NM_000051	c.2574_2575insT	c.2571_2572insT	p.N859_V3056del			0	-0.13382	1	0
ATM	11	108141874	G	T	SpliceSite	NM_000051	c.2921+1G>T					0	0.444001	0	1
ATM	11	108141874	G	A	SpliceSite	NM_000051	c.2921+1G>A					0.00013	0.293163	1	0
ATM	11	108141970	TACCACAGCAATGTGTG	T	SpliceSite	NM_000051	c.2922-7_2930delACCACAGCAATGTGTG					0	0.569311	4	1
ATM	11	108141981	TGTGTG	T	Frameshift	NM_000051	c.2926_2930delGTGTG					0	0.569311	3	1
ATM	11	108143266	AC	A	Frameshift	NM_000051	c.3086delC					0	0.00541374	1	0
ATM	11	108150243	T	TT	Frameshift	NM_000051	c.3310_3311insT	c.3308_3309insT				0	-0.0293948	1	0
ATM	11	108150253	T	A	StopGain	NM_000051	c.3320T>A		p.L1107*			0	0.346537	1	1
ATM	11	108155008	GG	G	StopGain	NM_000051	c.3802delG	c.3801delG	p.V1268_V3056del			8.9e-05	0.237258	3	1
ATM	11	108160435	T	G	StopGain	NM_000051	c.4343T>G		p.L1448*			0	0.618043	1	0
ATM	11	108163500	C	T	StopGain	NM_000051	c.4591C>T		p.Q1531*			0	0.583235	1	0
ATM	11	108170613	G	A	SpliceSite	NM_000051	c.5177+1G>A					0	0.437039	0	1
ATM	11	108175420	C	T	StopGain	NM_000051	c.5515C>T		p.Q1839*			0	0.618043	1	0
ATM	11	108180888	CC	C	Frameshift	NM_000051	c.5765delC	c.5764delC				0	0.0750307	1	0
ATM	11	108180895	C	A	StopGain	NM_000051	c.5771C>A		p.S1924*			0	0.381346	1	0
ATM	11	108183151	G	T	StopGain	NM_000051	c.5932G>T		p.E1978*			9.9e-05	0.475641	3	1
ATM	11	108188212	G	A	StopGain	NM_000051	c.6311G>A		p.W2104*			0	0.625005	0	1
ATM	11	108196092	CA	C	Frameshift	NM_000051	c.6629delA					0	0.618043	1	0
ATM	11	108196190	A	AA	Frameshift	NM_000051	c.6726_6727insA	c.6725_6726insA				0	0.430077	0	1
ATM	11	108196844	T	TT	StopGain	NM_000051	c.6867_6868insT	c.6866_6867insT	p.E2290_V3056del			0	0.597158	1	0
ATM	11	108198405	TGT	T	Frameshift	NM_000051	c.7010_7011delGT	c.7009_7010delTG				0	0.569311	1	0
ATM	11	108200960	C	T	StopGain	NM_000051	c.7327C>T		p.R2443*			9e-06	0.555388	2	0
ATM	11	108202171	AGAGA	A	Frameshift	NM_000051	c.7517_7520delGAGA	c.7516-2_7517delAGAG				3.3e-05	0.39483	1	0
ATM	11	108202283	ATGTAA	A	SpliceSite	NM_000051	c.7629_7629+4delTGTAA	c.7626_7629+1delTAATG				9e-06	0.583235	1	0
ATM	11	108202604	A	C	SpliceSite	NM_000051	c.7630-2A>C					2.7e-05	0.246535	5	1
ATM	11	108203585	ATATTA	A	Frameshift	NM_000051	c.7886_7890delTATTA	c.7878_7882delTTATA				0	0.618043	1	0
ATM	11	108206660	A	AA	Frameshift	NM_000051	c.8240_8241insA	c.8238_8239insA				0	0.618043	2	0
ATM	11	108213967	C	T	StopGain	NM_000051	c.8287C>T		p.R2763*			0	0.597158	0	1
ATM	11	108214074	CTTTCAGTGCC	C	Frameshift	NM_000051	c.8395_8404delTTTCAGTGCC	c.8385_8394delTTTCAGTGCC				3.2e-05	0.557578	0	1
ATM	11	108216596	C	T	StopGain	NM_000051	c.8545C>T		p.R2849*			9e-06	0.583235	1	0
ATM	11	108216600	T	A	StopGain	NM_000051	c.8549T>A		p.L2850*			9e-06	0.576273	1	0
ATM	11	108224608	G	A	SpliceSite	NM_000051	c.8786+1G>A					1.8e-05	0.43322	1	0
ATM	11	108225602	G	A	SpliceSite	NM_000051	c.8850+1G>A					0	0.464886	1	0
ATP2A1	16	28890092	G	T	StopGain	NM_004320	c.100G>T		p.E34*			9.9e-05	0.412986	2	3
ATP2A1	16	28893886	CC	C	Frameshift	NM_004320	c.440delC	c.438delC				2.7e-05	0.441463	1	0
ATP2A1	16	28895922	C	T	StopGain	NM_004320	c.490C>T		p.R164*			0	0.618043	0	1
ATP2A1	16	28900257	C	T	StopGain	NM_004320	c.1078C>T		p.Q360*			0	0.625005	0	1
ATP2A1	16	28905565	G	A	SpliceSite	NM_004320	c.1184+1G>A					9e-05	0.236791	2	0
ATP2A1	16	28909553	G	C	SpliceSite	NM_004320	c.1546-1G>C					0	0.311729	1	0
ATP2A1	16	28909593	C	T	StopGain	NM_004320	c.1585C>T		p.R529*			9e-06	0.583235	0	1
ATP2A1	16	28912162	C	A	StopGain	NM_004320	c.2025C>A		p.C675*			1.8e-05	0.509799	3	1
ATP2A1	16	28913394	G	T	StopGain	NM_004320	c.2311G>T		p.E771*			9e-06	0.583235	1	0
ATP2A1	16	28913514	GACCGCTG	G	Frameshift	NM_004320	c.2332_2338delACCGCTG	c.2329_2335delCTGACCG				0	0.555388	1	0
ATP2A1	16	28913646	CC	C	Frameshift	NM_004320	c.2464delC	c.2457delC				2.7e-05	0.531965	0	1
ATP2A1	16	28913647	C	CC	Frameshift	NM_004320	c.2464_2465insC	c.2456_2457insC				0.00046	0.276919	4	2
ATP2A1	16	28914233	G	A	SpliceSite	NM_004320	c.2744+1G>A					0	0.339575	1	0
ATP2A1	16	28914380	T	TT	Frameshift	NM_004320	c.2774_2775insT	c.2773_2774insT				0	0.464886	0	1
ATP2A1	16	28914762	G	A	SpliceSite	NM_004320	c.2980+1G>A					9e-06	0.179456	0	1
ATP2A1	16	28914762	G	C	SpliceSite	NM_004320	c.2980+1G>C					9e-06	0.137686	0	1
ATP2C1	3	130659467	TGAATAGG	T	SpliceSite	NM_001001486	c.361-6_361delGAATAGG					0	0.625005	1	0
ATP2C1	3	130717141	C	T	StopGain	NM_001001486	c.2395C>T		p.R799*			9e-06	0.625005	0	1
ATR	3	142177840	CCAGT	C	Frameshift	NM_001184	c.7459_7462delACTG	c.7457_7460delTGAC				0	0.625005	0	1
ATR	3	142180795	T	TAA	Frameshift	NM_001184	c.7178_7179insTT	c.7177_7178insTT				0	0.625005	0	1
ATR	3	142180797	G	GAA	Frameshift	NM_001184	c.7176_7177insTT					0	0.625005	0	1
ATR	3	142180800	T	A	StopGain	NM_001184	c.7174A>T		p.K2392*			0	0.625005	0	1
ATR	3	142185248	G	C	StopGain	NM_001184	c.6815C>G		p.S2272*			0	0.625005	0	1
ATR	3	142188997	AT	A	Frameshift	NM_001184	c.6249delA					0	0.625005	1	0
ATR	3	142212151	ACCCT	A	SpliceSite	NM_001184	c.5899-2_5900delAGGG					0	0.625005	1	0
ATR	3	142217571	A	T	StopGain	NM_001184	c.5426T>A		p.L1809*			0	0.625005	1	4
ATR	3	142222272	T	TACTAC	StopGain	NM_001184	c.5219_5220insGTAGT	c.5212_5213insGTGTA				0	0.625005	0	1
ATR	3	142253920	A	AA	Intronic	NM_001184	c.3945+1_3945+2insT	c.3945+2_3945+3insT				0.00018	0.437527	1	0
ATR	3	142259780	G	A	StopGain	NM_001184	c.3547C>T		p.R1183*			0	0.625005	0	1
ATR	3	142269051	G	A	StopGain	NM_001184	c.2899C>T		p.Q967*			9e-06	0.625005	1	0
ATR	3	142269145	C	T	SpliceSite	NM_001184	c.2806-1G>A					0	0.625005	1	0
ATR	3	142274739	A	ATTTTTTTT	Frameshift	NM_001184	c.2320_2321insAAAAAAAA	c.2310_2311insAAAAAAAA				0	0.625005	2	0
ATR	3	142274739	A	ATTTTTTT	Frameshift	NM_001184	c.2320_2321insAAAAAAA	c.2310_2311insAAAAAAA				0	0.625005	1	4
ATR	3	142274739	A	AT	Frameshift	NM_001184	c.2320_2321insA	c.2310_2311insA				0	0.625005	3	0
ATR	3	142274760	AG	A	Frameshift	NM_001184	c.2299delC	c.2298delC				0	0.625005	0	1
ATR	3	142274978	ATCTCTGGGG	A	SpliceSite	NM_001184	c.2079-6_2081delCCCCAGAGA					0	0.625005	7	1
ATR	3	142274979	TCTCTGGGG	T	SpliceSite	NM_001184	c.2079-6_2080delCCCCAGAG					0	0.625005	2	0
ATR	3	142275259	G	A	StopGain	NM_001184	c.2044C>T		p.Q682*			0	0.625005	0	1
ATRIP	3	48488466	C	T	StopGain	NM_130384	c.217C>T		p.Q73*			2.2e-05	0.593401	1	0
ATRIP	3	48491485	A	AA	Frameshift	NM_130384	c.290_291insA	c.284_285insA				3.3e-05	0.547988	3	0
ATRIP	3	48493234	A	T	StopGain	NM_130384	c.481A>T		p.R161*			0	0.618043	0	1
ATRIP	3	48498658	G	C	SpliceSite	NM_130384	c.672-1G>C					0	0.618043	1	0
ATRIP	3	48500763	A	T	StopGain	NM_130384	c.835A>T		p.K279*			0	0.618043	0	0
ATRIP	3	48501604	CTGGA	C	StopGain	NM_130384	c.1152_1155delTGGA		p.T384_G791delinsT			0.00047	0.38687	4	3
ATRIP	3	48505500	T	A	StopGain	NM_130384	c.1943T>A		p.L648*			0	0.618043	1	1
AUNIP	1	26163910	G	A	StopGain	NM_024037	c.214C>T		p.Q72*			9e-06	0.457924	0	1
AUNIP	1	26164005	AGG	A	Frameshift	NM_024037	c.117_118delCC					0.00053	-0.22776	10	10
AUNIP	1	26164008	AG	A	Frameshift	NM_024037	c.115delC					0.00053	-0.22776	10	10
BARD1	2	215593734	T	C	SpliceSite	NM_000465	c.2002-2A>G					9e-06	0.388307	1	0
BARD1	2	215595181	T	TCATACTTTTCTTCCTGTTCA	Frameshift	NM_000465	c.1954_1955insTGAACAGGAAGAAAAGTATG	c.1921_1922insGAAGAAAAGTATGTGAACAG				0.00013	0.453282	3	3
BARD1	2	215595231	C	T	StopGain	NM_000465	c.1905G>A		p.W635*			9e-06	0.618043	1	0
BARD1	2	215610446	CT	C	StopGain	NM_000465	c.1809delA		p.T603_S777delinsT			0	0.430077	1	0
BARD1	2	215610462	AGTATATTT	A	StopGain	NM_000465	c.1786_1793delAAATATAC		p.K596_S777del			0	0.60412	1	0
BARD1	2	215610566	G	A	StopGain	NM_000465	c.1690C>T		p.Q564*			4.5e-05	0.381032	2	1
BARD1	2	215634038	T	C	SpliceSite	NM_000465	c.1315-2A>G					0	0.165533	1	0
BARD1	2	215645316	C	A	StopGain	NM_000465	c.1282G>T		p.G428*			0	0.60412	1	0
BAZ1B	7	72907233	G	T	StopGain	NM_032408	c.590C>A		p.S197*			0	0.625005	0	1
BLM	15	91290721	G	C	SpliceSite	NM_001287246	c.98+1G>C					6.1e-05	0.50034	2	1
BLM	15	91292710	TTT	T	Frameshift	NM_001287246	c.213_214delTT	c.211_212delTT				9e-06	0.625005	1	0
BLM	15	91293053	ATC	A	Frameshift	NM_001287246	c.556_557delTC					9.4e-06	0.625005	5	0
BLM	15	91303887	G	A	StopGain	NM_001287246	c.1284G>A		p.W428*			0	0.625005	0	1
BLM	15	91304245	C	T	StopGain	NM_001287246	c.1642C>T		p.Q548*			0.00067	0.369899	4	2
BLM	15	91306246	C	T	StopGain	NM_001287246	c.1933C>T		p.Q645*			9e-05	0.487412	2	1
BLM	15	91310156	T	TA	Frameshift	NM_001287246	c.2210_2211insA					0.00015	0.44745	0	3
BLM	15	91328183	C	T	StopGain	NM_001287246	c.2695C>T		p.R899*			0.00013	0.460244	1	3
BLM	15	91337404	AG	A	Frameshift	NM_001287246	c.3028delG					3.6e-05	0.550057	2	1
BLM	15	91341513	CAT	C	Frameshift	NM_001287246	c.3305_3306delAT					0	0.625005	0	2
BLM	15	91346866	CTT	C	Frameshift	NM_001287246	c.3475_3476delTT					9e-06	0.625005	1	0
BLM	15	91347438	A	AA	Frameshift	NM_001287246	c.3600_3601insA	c.3594_3595insA				0	0.625005	1	0
BLM	15	91347505	A	AA	Frameshift	NM_001287246	c.3667_3668insA	c.3666_3667insA				0	0.625005	1	0
BLM	15	91352474	G	T	StopGain	NM_001287246	c.3859G>T		p.E1287*			0	0.625005	1	0
BLOC1S2	10	102045873	G	T	StopGain	NM_173809	c.153C>A		p.Y51*			0.00031	0.413976	2	5
BPTF	17	65942283	C	T	StopGain	NM_182641	c.7459C>T		p.Q2487*			0	0.625005	1	0
BPTF	17	65955782	A	AG	Frameshift	NM_182641	c.8052_8053insG					0.00014	0.45214	4	5
BPTF	17	65955784	CTTCA	C	Frameshift	NM_182641	c.8055_8058delTTCA					9.1e-05	0.486943	4	5
BRIP1	17	59763337	A	C	StopGain	NM_032043	c.2765T>G		p.L922*			2.7e-05	0.580697	1	1
BRIP1	17	59763414	TATGG	T	StopGain	NM_032043	c.2684_2687delCCAT	c.2682_2685delATCC	p.S895_K1249del			6.5e-05	0.498631	1	0
BRIP1	17	59763495	CT	C	Frameshift	NM_032043	c.2606delA					0	0.625005	0	1
BRIP1	17	59793404	G	C	StopGain	NM_032043	c.2400C>G		p.Y800*			5.4e-05	0.516148	0	1
BRIP1	17	59793412	G	A	StopGain	NM_032043	c.2392C>T		p.R798*			0.00031	0.413976	2	0
BRIP1	17	59820479	T	TA	Frameshift	NM_032043	c.2273_2274insT	c.2272_2273insT				1.8e-05	0.614224	4	0
BRIP1	17	59853848	C	CA	StopGain	NM_032043	c.2010_2011insT	c.2007_2008insT	p.E671_K1249del			1.8e-05	0.614224	0	1
BRIP1	17	59876455	TCTTA	T	Intronic	NM_032043	c.1340+2_1340+5delTAAG	c.1338_1340+1delTAAG				0	0.625005	0	1
BRIP1	17	59878688	G	A	StopGain	NM_032043	c.1066C>T		p.R356*			5.8e-05	0.507263	1	0
BRIP1	17	59878698	A	C	StopGain	NM_032043	c.1056T>G		p.Y352*			0	0.625005	1	0
BRIP1	17	59926534	G	A	StopGain	NM_032043	c.463C>T		p.Q155*			0	0.625005	1	0
BRIP1	17	59934594	T	C	SpliceSite	NM_032043	c.206-2A>G					9e-06	0.625005	0	1
BRIP1	17	59938803	CTTAC	C	Intronic	NM_032043	c.93+1_93+4delGTAA	c.93+4_93+7delAGTA				6.5e-05	0.498631	1	1
BRIP1	17	59938845	T	TA	StopGain	NM_032043	c.55_56insT	c.53_54insT	p.Y19_K1249delinsL			0	0.625005	2	0
BRIP1	17	59938898	CAT	C	Translation	NM_032043	c.1_2delAT	c.-1_1delTA				0	0.625005	0	1
C4orf48	4	2044517	ACCTGCGGA	A	Frameshift	NM_001141936	c.189_196delCCTGCGGA	c.186_193delGGACCTGC				0	0.569311	0	1
C4orf48	4	2045586	A	G	SpliceSite	NM_001141936	c.223-2A>G					0	0.186418	1	0
C6orf211/ARMT1	6	151773702	CTCTC	C	Frameshift	NM_024573	c.23_26delTCTC	c.19_22delTCTC				0	0.464886	2	1
C6orf211/ARMT1	6	151775695	T	A	StopGain	NM_024573	c.54T>A		p.Y18*			6.4e-05	0.387673	1	1
C6orf211/ARMT1	6	151775753	C	T	StopGain	NM_024573	c.112C>T		p.R38*			2.7e-05	0.55285	0	1
C6orf211/ARMT1	6	151779510	A	AA	Frameshift	NM_024573	c.195_196insA	c.194_195insA				0	0.625005	0	1
C6orf211/ARMT1	6	151779679	C	T	StopGain	NM_024573	c.364C>T		p.R122*			3e-05	0.567317	1	0
C6orf211/ARMT1	6	151785685	C	T	StopGain	NM_024573	c.490C>T		p.Q164*			0	0.256035	0	1
C6orf211/ARMT1	6	151785727	AAAGA	A	Frameshift	NM_024573	c.533_536delAAGA	c.531_534delGAAA				6.6e-05	0.393774	0	1
C6orf57/SDHAF4	6	71276651	CAT	C	Frameshift	NM_145267	c.9_10delAT					0	0.137686	0	1
C6orf57/SDHAF4	6	71289115	A	T	SpliceSite	NM_145267	c.65-2A>T					9.4e-06	0.144648	0	1
CCDC11/CFAP53	18	47769339	C	A	StopGain	NM_145020	c.1144G>T		p.E382*			6.5e-05	0.394205	0	1
CCDC11/CFAP53	18	47777127	C	G	SpliceSite	NM_145020	c.996+1G>C					9e-06	0.228188	0	1
CCDC11/CFAP53	18	47777259	G	A	StopGain	NM_145020	c.865C>T		p.Q289*			1.8e-05	0.363603	2	0
CCDC66	3	56597718	A	AT	StopGain	NM_001012506	c.7_8insT		p.N3_F914delinsI			0	0.221226	0	1
CCDC66	3	56600717	CC	C	Frameshift	NM_001012506	c.539delC	c.537delC				9e-06	0.0332605	1	1
CCDC66	3	56600774	C	T	StopGain	NM_001012506	c.595C>T		p.Q199*			0	0.583235	1	0
CCDC66	3	56601050	AGC	A	Frameshift	NM_001012506	c.682_683delGC					0	0.485771	1	0
CCDC66	3	56601067	G	A	StopGain	NM_001012506	c.698G>A		p.W233*			0.0029	0.283179	13	18
CCDC66	3	56605240	AGA	A	Frameshift	NM_001012506	c.745_746delGA	c.744_745delAG				0.00028	0.396009	5	0
CCDC66	3	56605241	G	T	StopGain	NM_001012506	c.745G>T		p.E249*			0.0027	0.283614	1	0
CCDC66	3	56628021	C	T	StopGain	NM_001012506	c.1267C>T		p.R423*			6e-05	0.460816	0	2
CCDC66	3	56628033	C	T	StopGain	NM_001012506	c.1279C>T		p.R427*			0.0065	0.243484	50	78
CCDC66	3	56649171	A	T	StopGain	NM_001012506	c.1480A>T		p.K494*			0	0.583235	1	1
CCDC66	3	56649172	AGACAA	A	StopGain	NM_001012506	c.1482_1486delGACAA	c.1479_1483delCAAGA	p.K494_F914delinsK			0.00018	0.395756	2	0
CCDC66	3	56649201	C	T	StopGain	NM_001012506	c.1510C>T		p.R504*			0.00012	0.405223	1	1
CCDC66	3	56649301	G	T	SpliceSite	NM_001012506	c.1609+1G>T					0	0.339575	0	0
CCDC66	3	56649995	C	G	StopGain	NM_001012506	c.1655C>G		p.S552*			0	0.346537	1	2
CCDC66	3	56651367	ACAAA	A	Frameshift	NM_001012506	c.1970_1973delCAAA	c.1963_1966delAAAC				0.00053	0.336138	5	3
CCDC66	3	56651523	G	GGCAGATGGAATTGCTTCATTTGGTAG	StopGain	NM_001012506	c.2125_2126insGCAGATGGAATTGCTTCATTTGGTAG	c.2097_2098insAGGCAGATGGAATTGCTTCATTTGGT	p.V709fs			0.00013	0.411512	1	0
CCDC66	3	56651545	T	TACCT	Frameshift	NM_001012506	c.2147_2148insACCT	c.2143_2144insACCT				0	0.0402222	1	0
CCDC66	3	56651615	G	GG	Frameshift	NM_001012506	c.2217_2218insG	c.2215_2216insG				0.00044	0.140512	10	6
CCDC66	3	56652226	ATTCA	A	Frameshift	NM_001012506	c.2263_2266delTTCA	c.2254_2257delATTC				6.5e-05	0.241048	1	0
CCDC66	3	56653392	AGAGA	A	Frameshift	NM_001012506	c.2371_2374delGAGA	c.2365_2368delGAGA				4.5e-05	0.506342	1	0
CCDC66	3	56653422	AGA	A	Frameshift	NM_001012506	c.2401_2402delGA	c.2400_2401delAG				0.0049	0.0570586	4	4
CCDC66	3	56653817	AA	A	Frameshift	NM_001012506	c.2547delA	c.2543delA				0.00026	0.161222	4	0
CCDC66	3	56653834	T	TGATT	StopGain	NM_001012506	c.2563_2564insGATT	c.2557_2558insTTGA	p.S855_F914del			9.9e-05	-0.248375	3	6
CCDC66	3	56653837	GACTG	G	Frameshift	NM_001012506	c.2567_2570delACTG	c.2564_2567delCTGA				0.00073	0.0935138	2	4
CCDC66	3	56653870	A	AAACA	Frameshift	NM_001012506	c.2599_2600insAACA	c.2595_2596insAACA				3.6e-05	-0.180921	1	0
CCDC7	10	32740845	A	AA	Frameshift	NM_145023	c.275_276insA	c.273_274insA				0.00035	0.152398	0	0
CCDC7	10	32740850	G	T	SpliceSite	NM_145023	c.279+1G>T					5.5e-05	0.103242	1	1
CCDC7	10	32745182	G	GAATG	Frameshift	NM_145023	c.376_377insAATG	c.374_375insTGAA				0	-0.00154796	0	1
CCDC7	10	32760016	C	T	StopGain	NM_145023	c.535C>T		p.Q179*			7.3e-05	0.230599	2	2
CDH1	16	68845764	T	G	SpliceSite	NM_004360	c.1008+2T>G					0	0.402231	1	0
CDH1	16	68855902	A	C	SpliceSite	NM_004360	c.1712-2A>C					9e-06	0.23515	1	0
CDH1	16	68855903	G	A	SpliceSite	NM_004360	c.1712-1G>A					0	0.367422	1	0
CDH1	16	68863647	C	CC	Frameshift	NM_004360	c.2386_2387insC	c.2381_2382insC				0	0.0611073	1	0
CDK11A	1	1635271	CTT	C	Frameshift	NM_024011	c.1901_1902delAA	c.1900_1901delAA				0.00091	0.342236	1	1
CDK11A	1	1635315	TTC	T	Frameshift	NM_024011	c.1857_1858delGA	c.1856_1857delAG				4.5e-05	0.527227	1	0
CDK11A	1	1635536	T	TA	Frameshift	NM_024011	c.1735_1736insT	c.1734_1735insT				0.0029	0.297103	16	20
CDK11A	1	1635744	AC	A	StopGain	NM_024011	c.1603delG	c.1598delG	p.V535_F780del			9e-05	0.48045	1	0
CDK11A	1	1639664	T	TTTCTTCCTCAC	Frameshift	NM_024011	c.1023_1024insGTGAGGAAGAA	c.1010_1011insAAGTGAGGAAG				0	0.618043	1	1
CDK11A	1	1639665	T	TTC	Frameshift	NM_024011	c.1022_1023insGA	c.1019_1020insAG				0	0.618043	1	0
CDK11A	1	1647872	CG	C	Frameshift	NM_024011	c.400delC					0	0.618043	1	0
CDS1	4	85555093	G	A	SpliceSite	NM_001263	c.722+1G>A					0	0.625005	0	1
CDS1	4	85556448	AAT	A	Frameshift	NM_001263	c.755_756delAT					0	0.625005	0	1
CDS1	4	85556483	TGGGAGAAC	T	Frameshift	NM_001263	c.790_797delGGGAGAAC					0	0.625005	0	1
CDS1	4	85561990	G	A	SpliceSite	NM_001263	c.880-1G>A					0	0.625005	1	0
CEACAM1	19	43015742	G	T	StopGain	NM_001712	c.1415C>A		p.S472*			0	0.583235	1	0
CEACAM1	19	43023255	TG	T	Frameshift	NM_001712	c.1090delC	c.1089delC				9e-06	0.583235	0	0
CEACAM1	19	43026090	G	GTGAC	Frameshift	NM_001712	c.688_689insGTCA	c.682_683insCAGT				0	0.583235	0	1
CEACAM1	19	43026314	GT	G	Frameshift	NM_001712	c.464delA	c.463delA				5.4e-05	0.474378	2	0
CEP104	1	3739776	A	AC	Frameshift	NM_014704	c.2532_2533insG	c.2530_2531insG				0	0.625005	0	1
CEP104	1	3739785	CCAGCTTCTCCGGTTTGG	C	Frameshift	NM_014704	c.2507_2523delCCAAACCGGAGAAGCTG	c.2504-2_2518delAGCTGCCAAACCGGAGA				9e-06	0.625005	1	0
CEP104	1	3739987	C	T	SpliceSite	NM_014704	c.2503+1G>A					0.00013	0.460244	1	0
CEP104	1	3742355	A	T	StopGain	NM_014704	c.2331T>A		p.C777*			0	0.625005	1	0
CEP104	1	3753135	A	C	StopGain	NM_014704	c.1241T>G		p.L414*			0	0.625005	1	0
CEP104	1	3753165	TCTGCATTA	T	Frameshift	NM_014704	c.1203_1210delTAATGCAG	c.1201_1208delAGTAATGC				0	0.625005	1	0
CEP104	1	3753194	TGCCTCCCCATAATGCTTACGAATAGCTGGAAGAGGCC	T	Frameshift	NM_014704	c.1145_1181delGGCCTCTTCCAGCTATTCGTAAGCATTATGGGGAGGC	c.1143_1179delGCGGCCTCTTCCAGCTATTCGTAAGCATTATGGGGAG				0	0.625005	1	0
CEP104	1	3753892	CG	C	Frameshift	NM_014704	c.1082delC	c.1080delC				0	0.625005	1	0
CEP104	1	3753972	G	A	StopGain	NM_014704	c.1003C>T		p.Q335*			0.00018	0.437527	4	2
CEP104	1	3754080	G	A	StopGain	NM_014704	c.895C>T		p.R299*			2.7e-05	0.580697	1	0
CEP104	1	3755527	C	T	SpliceSite	NM_014704	c.891+1G>A					0	0.625005	1	0
CEP104	1	3755628	TC	T	Frameshift	NM_014704	c.790delG	c.789delG				0	0.625005	0	1
CEP104	1	3755660	A	C	StopGain	NM_014704	c.759T>G		p.Y253*			6.3e-05	0.499488	0	2
CEP104	1	3756170	A	G	SpliceSite	NM_014704	c.735+2T>C					0	0.625005	1	1
CEP104	1	3761541	G	A	StopGain	NM_014704	c.496C>T		p.R166*			6.5e-05	0.498631	1	0
CEP104	1	3764163	CAG	C	StopGain	NM_014704	c.300_301delCT	c.295_296delTC	p.L100_R925delinsL			0	0.625005	1	0
CEP104	1	3765296	G	A	StopGain	NM_014704	c.163C>T		p.R55*			9e-06	0.625005	0	1
CEP55	10	95259871	C	CC	Frameshift	NM_001127182	c.63_64insC	c.61_62insC				0	0.625005	1	0
CEP55	10	95262942	C	T	StopGain	NM_001127182	c.256C>T		p.R86*			0.0013	0.329504	5	5
CEP55	10	95262960	A	T	StopGain	NM_001127182	c.274A>T		p.K92*			0	0.625005	1	0
CEP55	10	95263146	G	A	SpliceSite	NM_001127182	c.459+1G>A					0	0.625005	0	1
CEP55	10	95266799	A	AA	Frameshift	NM_001127182	c.514_515insA	c.511_512insA				9e-06	0.625005	0	1
CEP55	10	95276745	A	T	StopGain	NM_001127182	c.733A>T		p.K245*			0	0.625005	0	1
CEP55	10	95276808	C	T	StopGain	NM_001127182	c.796C>T		p.R266*			5.8e-05	0.507263	1	0
CEP55	10	95276919	AA	A	Frameshift	NM_001127182	c.908delA	c.907delA				1.8e-05	0.614224	0	2
CHEK2	22	29090028	AC	A	Frameshift	NM_007194	c.1452delG					0	0.60412	1	0
CHEK2	22	29091226	TA	T	Frameshift	NM_007194	c.1263delT	c.1262delT				9.9e-05	0.231982	4	0
CHEK2	22	29091696	AC	A	Intronic	NM_007194	c.1259+1delG	c.1259delG				0	0.464886	1	0
CHEK2	22	29091725	C	T	StopGain	NM_007194	c.1232G>A		p.W411*			1.8e-05	0.614224	1	0
CHEK2	22	29091816	TGA	T	Frameshift	NM_007194	c.1139_1140delTC	c.1134_1135delCT				9e-06	0.346537	1	0
CHEK2	22	29091856	AG	A	Frameshift	NM_007194	c.1100delC					0.01	0.191318	86	28
CHEK2	22	29095913	T	TC	Frameshift	NM_007194	c.920_921insG	c.915_916insG				0	0.618043	1	0
CHEK2	22	29095927	T	C	SpliceSite	NM_007194	c.909-2A>G					0	0.0402222	1	0
CHEK2	22	29115468	CA	C	Frameshift	NM_007194	c.597delT	c.593delT				0	0.450963	1	0
CHEK2	22	29121230	C	T	SpliceSite	NM_007194	c.444+1G>A					0.00019	-0.08112	9	1
CHEK2	22	29121266	G	A	StopGain	NM_007194	c.409C>T		p.R137*			6.5e-05	0.429014	1	1
CHEK2	22	29130432	CA	C	Frameshift	NM_007194	c.277delT					0	0.618043	2	1
CHEK2	22	29130509	GGA	G	Frameshift	NM_007194	c.199_200delTC					0	0.36046	1	0
CHEK2	22	29130625	G	A	StopGain	NM_007194	c.85C>T		p.Q29*			1.8e-05	0.523722	1	0
CHEK2	22	29130652	G	A	StopGain	NM_007194	c.58C>T		p.Q20*			0.0012	0.270342	0	1
CIDEB	14	24774972	C	T	SpliceSite	NM_014430	c.528-1G>A					9.1e-06	0.388307	0	1
CIDEB	14	24775152	C	T	SpliceSite	NM_014430	c.527+1G>A					0.0003	0.192181	2	2
CIDEB	14	24775194	CAT	C	Frameshift	NM_014430	c.484_485delAT	c.483_484delTA				8.1e-05	0.28271	3	2
CIDEB	14	24775223	T	A	StopGain	NM_014430	c.457A>T		p.K153*			6e-05	0.39816	1	0
CIDEB	14	24775283	G	A	StopGain	NM_014430	c.397C>T		p.R133*			5.8e-05	0.381952	1	0
CIDEB	14	24775579	C	T	SpliceSite	NM_014430	c.336+1G>A					0.0016	-0.0226924	7	6
CIDEB	14	24775632	TCCTC	T	Frameshift	NM_014430	c.280_283delGAGG	c.279_282delGGAG				0	0.534503	0	1
CIDEB	14	24776657	G	A	StopGain	NM_014430	c.106C>T		p.R36*			1.8e-05	0.530684	0	1
CIDEB	14	24776667	TG	T	Frameshift	NM_014430	c.95delC	c.94delC				0	-0.0920501	0	2
CIDEB	14	24777057	T	TAC	Frameshift	NM_014430	c.7_8insGT	c.5_6insGT				0	0.541465	0	1
CLCN2	3	184070245	G	A	StopGain	NM_004366	c.2257C>T		p.R753*			6.6e-05	0.4982	1	0
CLCN2	3	184070836	C	A	StopGain	NM_004366	c.2128G>T		p.G710*			0	0.625005	0	2
CLCN2	3	184071109	T	A	StopGain	NM_004366	c.1957A>T		p.R653*			9e-06	0.625005	0	2
CLCN2	3	184071901	C	T	StopGain	NM_004366	c.1709G>A		p.W570*			8.9e-05	0.487879	1	1
CLCN2	3	184072335	C	T	SpliceSite	NM_004366	c.1507+1G>A					9e-06	0.625005	1	0
CLCN2	3	184073499	G	A	StopGain	NM_004366	c.1153C>T		p.Q385*			9e-06	0.625005	0	1
CLCN2	3	184073538	G	GAT	Frameshift	NM_004366	c.1113_1114insAT					0	0.625005	0	1
CLCN2	3	184075587	GGGAGA	G	Frameshift	NM_004366	c.668_672delTCTCC	c.665_669delTCCTC				0.00026	0.418805	1	2
CLCN2	3	184076603	T	C	SpliceSite	NM_004366	c.221-2A>G					0	0.625005	1	1
CLEC10A	17	6979091	T	TCAGCTGG	Frameshift	NM_182906	c.633_634insCCAGCTG	c.623_624insCTGCCAG				0.00036	-0.022794	0	2
CLEC10A	17	6979178	CA	C	Frameshift	NM_182906	c.546delT					1.8e-05	-0.0680224	1	2
CLEC10A	17	6979328	G	A	StopGain	NM_182906	c.496C>T		p.Q166*			0	0.186418	1	0
CLEC10A	17	6979370	G	A	StopGain	NM_182906	c.454C>T		p.R152*			0.0002	0.0406155	1	0
CLEC10A	17	6979446	AGT	A	Frameshift	NM_182906	c.376_377delAC	c.372_373delAC				0	-0.349633	0	1
CLEC10A	17	6980125	T	C	SpliceSite	NM_182906	c.281-2A>G					0	-0.154705	0	1
CLEC10A	17	6980210	C	A	SpliceSite	NM_182906	c.280+1G>T					6.3e-05	0.102671	2	0
CLEC10A	17	6981418	G	A	StopGain	NM_182906	c.82C>T		p.Q28*			0.00028	0.131465	2	4
CLEC10A	17	6982107	G	A	StopGain	NM_182906	c.25C>T		p.Q9*			0	0.186418	0	1
CLINT1	5	157236658	CT	C	Frameshift	NM_014666	c.672delA					0	0.625005	0	1
CLUH	17	2595346	C	CCGGAACTCAG	StopGain	NM_015229	c.3488_3489insCTGAGTTCCG	c.3477_3478insGCTGAGTTCC				0	0.597158	0	1
CLUH	17	2597471	TG	T	Frameshift	NM_015229	c.2919delC	c.2916delC				0	0.597158	1	0
CLUH	17	2598818	C	CAA	StopGain	NM_015229	c.2276_2277insTT	c.2275_2276insTT	p.V759_G1309delinsV			1e-05	0.597158	0	1
CLUH	17	2605324	A	AGGCGGGCC	Frameshift	NM_015229	c.388_389insGGCCCGCC					0	0.597158	0	1
CLUH	17	2605325	T	TCACGCACCGTGTAC	StopGain	NM_015229	c.387_388insGTACACGGTGCGTG					0	0.597158	0	1
COL5A2	2	189929369	C	A	StopGain	NM_000393	c.1630G>T		p.E544*			0	0.625005	1	0
COL5A2	2	189943826	GCTTCACCCT	G	SpliceSite	NM_000393	c.961-2_967delAGGGTGAAG					0	0.625005	1	0
CTBP1	4	1209892	GCCCCAGC	G	Frameshift	NM_001328	c.642_648delGCTGGGG					0	0.625005	3	1
CTBP1	4	1209900	G	GA	Frameshift	NM_001328	c.640_641insT					0	0.625005	3	1
CTBP1	4	1232120	G	A	StopGain	NM_001328	c.46C>T		p.R16*			0	0.625005	1	0
DARS2	1	173794374	TTCCCTTCTTGGTTAAGT	T	Frameshift	NM_018122	c.8_24delTCCCTTCTTGGTTAAGT	c.7_23delTTCCCTTCTTGGTTAAG				0	0.625005	0	1
DARS2	1	173795858	G	GG	Frameshift	NM_018122	c.161_162insG	c.160_161insG				0	0.625005	1	1
DARS2	1	173795895	C	CT	Frameshift	NM_018122	c.198_199insT					0	0.625005	0	2
DARS2	1	173800770	T	C	SpliceSite	NM_018122	c.492+2T>C					0.00093	0.347317	7	1
DGAT2	11	75509317	C	A	StopGain	NM_032564	c.855C>A		p.Y285*			0.00085	0.305954	7	14
DKKL1	19	49867922	CC	C	Frameshift	NM_014419	c.95delC	c.94delC				0	-0.0781267	0	1
DNAH11	7	21582888	G	T	StopGain	NM_001277115	c.25G>T		p.E9*	rs753645186	1.12677e-05	1.9e-05	0.283693	0	1
DNAH11	7	21583148	AA	A	Frameshift	NM_001277115	c.286delA	c.284delA				0	-0.126859	0	1
DNAH11	7	21600694	GG	G	Frameshift	NM_001277115	c.889delG	c.888delG				0	-0.0433182	1	0
DNAH11	7	21609735	G	T	StopGain	NM_001277115	c.1243G>T		p.E415*			0	0.618043	1	0
DNAH11	7	21628196	C	T	StopGain	NM_001277115	c.1915C>T		p.Q639*	rs200073714	0.000178338	0.00013	0.0634266	1	3
DNAH11	7	21628211	C	T	StopGain	NM_001277115	c.1930C>T		p.R644*			0	0.583235	0	1
DNAH11	7	21630640	GG	G	Intronic	NM_001277115	c.2274+1delG	c.2274delG				0	0.290843	0	1
DNAH11	7	21631196	G	A	SpliceSite	NM_001277115	c.2667+1G>A					0	0.283882	1	0
DNAH11	7	21654819	A	T	StopGain	NM_001277115	c.3940A>T		p.K1314*			0	0.618043	1	0
DNAH11	7	21655912	C	T	SpliceSite	NM_001277115	c.4095+2C>T			rs532007878	0.000118554	0.00099	-0.417318	1	0
DNAH11	7	21658706	TCCCCCAATCAG	T	Intronic	NM_001277115	c.4255-11_4255-1delCCCCCAATCAG					0	0.402231	1	0
DNAH11	7	21658717	G	A	SpliceSite	NM_001277115	c.4255-1G>A					0	0.402231	0	1
DNAH11	7	21658796	C	T	StopGain	NM_001277115	c.4333C>T		p.R1445*	rs72657316	3.21691e-05	4.5e-05	0.381032	4	4
DNAH11	7	21675657	C	T	StopGain	NM_001277115	c.4669C>T		p.R1557*	rs759040005	4.0292e-06	0	0.576273	0	1
DNAH11	7	21695601	T	C	SpliceSite	NM_001277115	c.5094+2T>C					0	0.423116	1	0
DNAH11	7	21723534	C	T	StopGain	NM_001277115	c.5593C>T		p.R1865*	rs767101212	2.00797e-05	6e-05	0.481701	1	0
DNAH11	7	21723553	TAACT	T	Frameshift	NM_001277115	c.5613_5616delAACT	c.5611_5614delCTAA				1.8e-05	0.252216	0	1
DNAH11	7	21726874	G	A	SpliceSite	NM_001277115	c.5778+1G>A			rs72657333	1.94116e-05	4.3e-05	0.363841	3	1
DNAH11	7	21742391	C	T	StopGain	NM_001277115	c.6244C>T		p.R2082*	rs200693106	3.62287e-05	6.6e-05	0.45643	1	1
DNAH11	7	21747434	C	T	StopGain	NM_001277115	c.6664C>T		p.R2222*	rs773498002	1.70166e-05	3.7e-05	0.527501	1	0
DNAH11	7	21750214	C	T	StopGain	NM_001277115	c.6727C>T		p.R2243*	rs201943194	8.58744e-05	0.0002	0.388701	4	2
DNAH11	7	21778317	A	G	SpliceSite	NM_001277115	c.7646-2A>G			rs1459433719	5.587e-06	0	0.207303	1	0
DNAH11	7	21784162	AA	A	Frameshift	NM_001277115	c.8262delA	c.8257delA				0	0.618043	0	1
DNAH11	7	21788361	G	A	SpliceSite	NM_001277115	c.8673+1G>A					0	0.464886	1	0
DNAH11	7	21789320	C	T	StopGain	NM_001277115	c.8698C>T		p.R2900*	rs368260932	4.63759e-05	9e-05	0.445642	0	3
DNAH11	7	21789946	G	A	StopGain	NM_001277115	c.8904G>A		p.W2968*			0	0.625005	0	1
DNAH11	7	21840781	CAC	C	Frameshift	NM_001277115	c.10054_10055delAC	c.10053_10054delCA				0	0.374384	0	1
DNAH11	7	21847555	TCT	T	Frameshift	NM_001277115	c.10221_10222delCT	c.10219_10220delCT				9e-06	0.402231	0	1
DNAH11	7	21847595	C	A	StopGain	NM_001277115	c.10260C>A		p.Y3420*			0	0.36046	1	0
DNAH11	7	21893975	C	T	StopGain	NM_001277115	c.11104C>T		p.R3702*	rs375983999	2.14157e-05	6.5e-05	0.449899	1	0
DNAH11	7	21912975	GG	G	Frameshift	NM_001277115	c.12052delG	c.12050delG				0	0.283882	0	1
DNAH11	7	21920434	C	T	StopGain	NM_001277115	c.12310C>T		p.R4104*	rs775230957	4.0139e-06	5.8e-05	0.458531	1	0
DNAH11	7	21939606	C	T	StopGain	NM_001277115	c.13171C>T		p.Q4391*	rs761855200	1.4271e-05	3e-05	0.504661	0	2
DNAH8	6	38690805	CC	C	Frameshift	NM_001206927	c.221delC	c.220delC				0	-0.17559	0	1
DNAH8	6	38690945	C	CC	Frameshift	NM_001206927	c.360_361insC	c.357_358insC				0	-0.119897	1	0
DNAH8	6	38691140	C	T	StopGain	NM_001206927	c.418C>T		p.R140*			0	0.0193371	0	1
DNAH8	6	38697701	TGCGAAAGATGG	T	Frameshift	NM_001206927	c.550_560delGCGAAAGATGG					0	0.207303	1	0
DNAH8	6	38702258	C	T	StopGain	NM_001206927	c.619C>T		p.R207*			9.8e-05	-0.136326	1	0
DNAH8	6	38704941	C	CC	Frameshift	NM_001206927	c.861_862insC	c.860_861insC				0	-0.071165	1	0
DNAH8	6	38718249	TAGAA	T	SpliceSite	NM_001206927	c.1294-2_1295delAGAA					0	0.409192	2	2
DNAH8	6	38743699	ATTTCATG	A	Frameshift	NM_001206927	c.1935_1941delTTTCATG					0	0.367422	1	1
DNAH8	6	38746207	TATCTT	T	Frameshift	NM_001206927	c.2007_2011delATCTT	c.2002_2006delATCTT				0	0.555388	0	1
DNAH8	6	38750778	A	C	SpliceSite	NM_001206927	c.2260-2A>C					1.8e-05	0.231331	1	1
DNAH8	6	38758064	G	C	SpliceSite	NM_001206927	c.2665-1G>C					3.4e-05	0.233101	0	1
DNAH8	6	38771083	GTCAG	G	Frameshift	NM_001206927	c.3031_3034delTCAG	c.3028_3031delCAGT				3.7e-05	0.471807	0	1
DNAH8	6	38775481	A	AA	Frameshift	NM_001206927	c.3246_3247insA	c.3245_3246insA				0	0.0262988	1	0
DNAH8	6	38783336	G	GG	Frameshift	NM_001206927	c.3426_3427insG	c.3421_3422insG				0	0.60412	0	1
DNAH8	6	38783392	TGACCCAT	T	Frameshift	NM_001206927	c.3483_3489delGACCCAT	c.3482_3488delTGACCCA				0.0004	-0.216019	1	3
DNAH8	6	38783421	A	T	StopGain	NM_001206927	c.3511A>T		p.K1171*			0	0.60412	0	1
DNAH8	6	38790667	G	GG	Frameshift	NM_001206927	c.3577_3578insG	c.3572_3573insG				0	0.283882	0	1
DNAH8	6	38810161	TG	T	Frameshift	NM_001206927	c.4485delG					0	0.541465	1	0
DNAH8	6	38810163	C	T	StopGain	NM_001206927	c.4486C>T		p.Q1496*			0	0.541465	0	1
DNAH8	6	38810557	A	T	StopGain	NM_001206927	c.4723A>T		p.K1575*			0	0.548426	1	0
DNAH8	6	38816447	AT	A	Frameshift	NM_001206927	c.5070delT					1.8e-05	0.335756	0	1
DNAH8	6	38816521	T	TT	Frameshift	NM_001206927	c.5143_5144insT	c.5140_5141insT				0	0.625005	1	0
DNAH8	6	38818078	C	T	StopGain	NM_001206927	c.5251C>T		p.R1751*			6.5e-05	0.477746	1	0
DNAH8	6	38828406	G	A	SpliceSite	NM_001206927	c.6131+1G>A					0.00011	0.308014	1	0
DNAH8	6	38838176	G	C	SpliceSite	NM_001206927	c.6829-1G>C					6.5e-05	0.164469	0	1
DNAH8	6	38840448	C	CTT	StopGain	NM_001206927	c.7127_7128insTT					0	0.583235	1	0
DNAH8	6	38840874	GCATGG	G	Frameshift	NM_001206927	c.7431_7435delCATGG	c.7429_7433delGGCAT				0	0.506656	1	0
DNAH8	6	38843538	TT	T	Frameshift	NM_001206927	c.7793delT	c.7792delT				1.8e-05	0.419297	0	2
DNAH8	6	38851679	C	T	StopGain	NM_001206927	c.8164C>T		p.R2722*			0	0.60412	0	1
DNAH8	6	38854693	C	T	StopGain	NM_001206927	c.8386C>T		p.R2796*			9.7e-05	0.442153	0	1
DNAH8	6	38862525	C	T	StopGain	NM_001206927	c.8632C>T		p.R2878*			0.00013	0.432397	2	0
DNAH8	6	38862527	AGA	A	Frameshift	NM_001206927	c.8635_8636delGA	c.8633_8634delGA				0.00011	0.238397	4	4
DNAH8	6	38862606	TT	T	Frameshift	NM_001206927	c.8714delT	c.8711delT				1.8e-05	0.217407	1	0
DNAH8	6	38863822	G	T	StopGain	NM_001206927	c.8761G>T		p.E2921*			1.8e-05	0.614224	0	1
DNAH8	6	38866132	A	ACACCA	Frameshift	NM_001206927	c.9039_9040insCACCA	c.9038_9039insACACC				0	0.353499	1	0
DNAH8	6	38866137	CAA	C	Frameshift	NM_001206927	c.9045_9046delAA					0	0.332614	1	0
DNAH8	6	38867558	C	T	StopGain	NM_001206927	c.9070C>T		p.R3024*			6.5e-05	0.491669	0	1
DNAH8	6	38867683	G	A	SpliceSite	NM_001206927	c.9194+1G>A					0.00013	0.307086	3	3
DNAH8	6	38881729	G	A	SpliceSite	NM_001206927	c.9963+1G>A					9e-06	0.464886	0	1
DNAH8	6	38885166	G	A	StopGain	NM_001206927	c.10292G>A		p.W3431*			9e-06	0.625005	1	0
DNAH8	6	38905779	GG	G	Frameshift	NM_001206927	c.11594delG	c.11593delG				0	0.0750307	0	1
DNAH8	6	38905788	C	T	StopGain	NM_001206927	c.11602C>T		p.R3868*			6.5e-05	0.234086	0	1
DNAH8	6	38906625	CC	C	StopGain	NM_001206927	c.11869delC	c.11868delC	p.L3957_K4707del			0	0.423116	1	0
DNAH8	6	38906634	T	G	StopGain	NM_001206927	c.11877T>G		p.Y3959*			2.7e-05	0.337037	1	0
DNAH8	6	38906723	GA	G	Frameshift	NM_001206927	c.11967delA					7.2e-05	0.446852	1	5
DNAH8	6	38939367	G	A	SpliceSite	NM_001206927	c.12452-1G>A					0	0.374384	0	1
DNAH8	6	38939412	C	T	StopGain	NM_001206927	c.12496C>T		p.R4166*			0.0004	0.35484	2	2
DNAH8	6	38939437	AGCAGGTA	A	SpliceSite	NM_001206927	c.12522_12525+3delGCAGGTA	c.12521_12525+2delAGCAGGT				9.1e-06	0.618043	0	1
DNAH8	6	38941536	C	T	StopGain	NM_001206927	c.12625C>T		p.R4209*			4.5e-05	0.450649	0	1
DNAH8	6	38950128	C	T	StopGain	NM_001206927	c.12841C>T		p.R4281*			9e-06	0.597158	0	1
DNAJC11	1	6727802	TTC	T	Frameshift	NM_018198	c.343_344delGA	c.332_333delAG				0	0.625005	0	0
DUOX2	15	45387794	C	T	SpliceSite	NM_014080	c.4081-1G>A					3.6e-05	0.376015	1	0
DUOX2	15	45388205	G	A	StopGain	NM_014080	c.3901C>T		p.Q1301*			6e-05	0.502586	0	1
DUOX2	15	45389837	TG	T	Frameshift	NM_014080	c.3667delC	c.3666delC				0.00014	0.361638	1	1
DUOX2	15	45390219	G	A	StopGain	NM_014080	c.3553C>T		p.Q1185*			0	0.374384	0	1
DUOX2	15	45392344	G	A	StopGain	NM_014080	c.3088C>T		p.Q1030*			0	0.597158	1	0
DUOX2	15	45392371	G	A	StopGain	NM_014080	c.3061C>T		p.R1021*			6.5e-05	0.227124	0	1
DUOX2	15	45392428	T	C	SpliceSite	NM_014080	c.3006-2A>G					0.00022	-0.00860926	2	2
DUOX2	15	45392960	CA	C	Frameshift	NM_014080	c.2997delT	c.2995delT				0.00018	0.159059	1	0
DUOX2	15	45393032	GGGAGCTGAGAAAAAGAAA	G	SpliceSite	NM_014080	c.2922-14_2925delTTTCTTTTTCTCAGCTCC					0.00012	0.196372	2	1
DUOX2	15	45393416	T	TC	Frameshift	NM_014080	c.2907_2908insG	c.2905_2906insG				1.8e-05	0.231331	1	0
DUOX2	15	45393425	TGAAC	T	Frameshift	NM_014080	c.2895_2898delGTTC	c.2893_2896delTCGT				0.0039	0.280984	28	47
DUOX2	15	45397994	GC	G	Frameshift	NM_014080	c.2180delG	c.2177delG				0.00012	-0.144751	1	0
DUOX2	15	45399120	G	A	StopGain	NM_014080	c.1741C>T		p.Q581*			2.4e-05	0.0637547	0	1
DUOX2	15	45401018	C	T	StopGain	NM_014080	c.1367G>A		p.W456*			0	0.60412	0	1
DUOX2	15	45401047	CA	C	Frameshift	NM_014080	c.1337delT					0	0.0750307	1	0
DUOX2	15	45402639	C	CA	Frameshift	NM_014080	c.1026_1027insT	c.1025_1026insT				0	0.374384	0	1
DUOX2	15	45403694	T	TC	Frameshift	NM_014080	c.602_603insG	c.596_597insG				0.0017	0.265791	21	36
DUOX2	15	45404800	CT	C	Frameshift	NM_014080	c.276delA					0	-0.0572416	0	1
DUOX2	15	45404866	GA	G	Frameshift	NM_014080	c.210delT					0	0.548426	0	1
DUOX2	15	45405183	A	G	SpliceSite	NM_014080	c.160+2T>C					0	0.374384	0	1
DUOX2	15	45405590	T	TCTGG	Frameshift	NM_014080	c.19_20insCCAG	c.15_16insCCAG				1.4e-05	0.214265	0	1
DYNC2H1	11	102980304	AT	A	Translation	NM_001080463	c.2delT					9e-06	0.262997	0	1
DYNC2H1	11	102984314	C	T	StopGain	NM_001080463	c.244C>T		p.R82*			0	0.60412	0	1
DYNC2H1	11	102987296	TAGGAG	T	SpliceSite	NM_001080463	c.622-2_624delAGGAG					0	0.60412	3	0
DYNC2H1	11	102991254	C	T	StopGain	NM_001080463	c.1078C>T		p.R360*			3e-05	0.53947	0	0
DYNC2H1	11	102991462	ACCTGCGG	A	Frameshift	NM_001080463	c.1180_1186delCCTGCGG					0	0.625005	1	0
DYNC2H1	11	102991468	GG	G	Frameshift	NM_001080463	c.1186delG	c.1185delG				0	0.625005	0	1
DYNC2H1	11	102991711	G	T	StopGain	NM_001080463	c.1306G>T		p.E436*			0	0.625005	1	0
DYNC2H1	11	102992130	C	T	StopGain	NM_001080463	c.1390C>T		p.R464*			0	0.625005	1	0
DYNC2H1	11	103005110	C	T	StopGain	NM_001080463	c.2167C>T		p.Q723*			2.7e-05	0.573735	1	0
DYNC2H1	11	103006290	G	T	StopGain	NM_001080463	c.2272G>T		p.E758*			0	0.625005	1	0
DYNC2H1	11	103006537	C	T	StopGain	NM_001080463	c.2434C>T		p.Q812*			0	0.625005	1	0
DYNC2H1	11	103006652	T	A	StopGain	NM_001080463	c.2549T>A		p.L850*			9.1e-06	0.618043	1	0
DYNC2H1	11	103022907	TT	T	Frameshift	NM_001080463	c.2990delT	c.2987delT				9e-06	0.625005	0	1
DYNC2H1	11	103024063	GT	G	Frameshift	NM_001080463	c.3129delT					0	0.0819924	1	0
DYNC2H1	11	103026054	TAACAG	T	Intronic	NM_001080463	c.3574-5_3574-1delAACAG	c.3574-4_3574delACAGA				0	0.423116	0	1
DYNC2H1	11	103027301	AA	A	Frameshift	NM_001080463	c.3930delA	c.3929delA				0	0.60412	0	1
DYNC2H1	11	103048551	T	C	SpliceSite	NM_001080463	c.6139+2T>C					8.2e-05	0.212639	1	0
DYNC2H1	11	103060546	G	C	SpliceSite	NM_001080463	c.7437+1G>C					0	0.388307	1	0
DYNC2H1	11	103070773	A	C	SpliceSite	NM_001080463	c.8089-2A>C					0	0.395269	1	0
DYNC2H1	11	103070831	C	A	StopGain	NM_001080463	c.8145C>A		p.Y2715*			7.4e-05	0.452931	0	1
DYNC2H1	11	103070832	C	T	StopGain	NM_001080463	c.8146C>T		p.Q2716*			7.4e-05	0.494701	0	1
DYNC2H1	11	103074476	TT	T	Frameshift	NM_001080463	c.8283delT	c.8277delT				0	0.625005	1	0
DYNC2H1	11	103082589	C	T	StopGain	NM_001080463	c.8611C>T		p.R2871*			0	0.597158	0	1
DYNC2H1	11	103092808	C	T	StopGain	NM_001080463	c.9157C>T		p.R3053*			9e-06	0.541465	0	1
DYNC2H1	11	103107208	GAAAAG	G	StopGain	NM_001080463	c.9760_9764delAAAAG	c.9759_9763delGAAAA	p.K3254_Q4314del			9e-06	0.625005	0	1
DYNC2H1	11	103124007	TAAATAGGA	T	SpliceSite	NM_001080463	c.10064-6_10065delAAATAGGA					0	0.430077	2	1
DYNC2H1	11	103124169	C	T	StopGain	NM_001080463	c.10219C>T		p.R3407*			1.8e-05	0.565492	0	3
DYNC2H1	11	103126833	A	G	SpliceSite	NM_001080463	c.10348-2A>G					0	0.31869	1	0
DYNC2H1	11	103126850	C	T	StopGain	NM_001080463	c.10363C>T		p.Q3455*			0	0.625005	1	0
DYNC2H1	11	103126952	C	T	StopGain	NM_001080463	c.10465C>T		p.Q3489*			0	0.625005	1	0
DYNC2H1	11	103128335	A	G	SpliceSite	NM_001080463	c.10483-2A>G					0	0.179456	1	0
DYNC2H1	11	103128448	C	T	StopGain	NM_001080463	c.10594C>T		p.R3532*			0.0007	0.242171	1	0
DYNC2H1	11	103229085	C	T	StopGain	NM_001080463	c.12175C>T		p.Q4059*			0	0.618043	1	0
DYNC2H1	11	103270590	T	A	StopGain	NM_001080463	c.12377T>A		p.L4126*			0	0.625005	1	0
DYNC2H1	11	103325969	C	A	StopGain	NM_001080463	c.12533C>A		p.S4178*			9e-06	0.625005	0	1
DYNC2H1	11	103327001	A	G	SpliceSite	NM_001080463	c.12588-2A>G					0	0.19338	1	0
DYNC2H1	11	103327055	C	T	StopGain	NM_001080463	c.12640C>T		p.R4214*			0	0.583235	0	1
E4F1	16	2273635	G	GTG	Frameshift	NM_004424	c.21_22insTG	c.18_19insGT				0	0.625005	0	1
E4F1	16	2279677	G	A	SpliceSite	NM_004424	c.415+1G>A					1.8e-05	0.614224	0	1
E4F1	16	2283485	A	ACCATGGTGTCATCAGAGGACATCGA	Frameshift	NM_004424	c.1103_1104insCCATGGTGTCATCAGAGGACATCGA	c.1101_1102insGACCATGGTGTCATCAGAGGACATC				0	0.625005	1	0
EAF2	3	121573568	C	G	StopGain	NM_018456	c.236C>G		p.S79*			0.00012	0.467878	0	2
EAF2	3	121591453	C	A	StopGain	NM_018456	c.554C>A		p.S185*			0	0.597158	0	1
EAF2	3	121591559	ACA	A	Frameshift	NM_018456	c.661_662delCA	c.658_659delAC				0	0.506656	1	0
EEFSEC	3	127965732	C	T	StopGain	NM_021937	c.370C>T		p.Q124*			3e-05	0.588202	0	1
EEFSEC	3	127981062	ATT	A	Frameshift	NM_021937	c.617_618delTT					2.7e-05	0.601582	2	1
EEFSEC	3	127983494	AT	A	Frameshift	NM_021937	c.657delT					1.8e-05	0.635109	1	0
EEFSEC	3	128060424	TACCT	T	Frameshift	NM_021937	c.1136_1139delACCT	c.1135_1138delTACC				1.8e-05	0.635109	0	1
EEFSEC	3	128077112	A	AA	Frameshift	NM_021937	c.1496_1497insA	c.1494_1495insA				5.4e-05	0.537033	1	1
EFCAB5	17	28268821	G	T	StopGain	NM_198529	c.7G>T		p.E3*			0	0.395269	1	2
EFCAB5	17	28269264	AGA	A	Frameshift	NM_198529	c.50_51delGA	c.49_50delAG				1.1e-05	0.56235	0	1
EFCAB5	17	28269290	G	GG	Frameshift	NM_198529	c.75_76insG	c.73_74insG				0.0002	-0.168235	1	0
EFCAB5	17	28295915	TGC	T	Frameshift	NM_198529	c.298_299delGC					0	-0.0990118	2	0
EFCAB5	17	28296269	T	G	StopGain	NM_198529	c.651T>G		p.Y217*			0.0024	-0.112554	0	0
EFCAB5	17	28320335	C	A	StopGain	NM_198529	c.920C>A		p.S307*			0.0014	-0.398102	12	15
EFCAB5	17	28361278	AGTGA	A	Frameshift	NM_198529	c.1076_1079delGTGA	c.1074_1077delGAGT				0.00011	0.447248	1	0
EFCAB5	17	28380293	G	T	StopGain	NM_198529	c.1321G>T		p.E441*			0	0.60412	0	1
EFCAB5	17	28380466	AT	A	Frameshift	NM_198529	c.1495delT					0	0.367422	0	1
EFCAB5	17	28380803	GAG	G	Frameshift	NM_198529	c.1832_1833delAG	c.1828_1829delAG				0.002	0.0414644	5	3
EFCAB5	17	28380824	C	T	StopGain	NM_198529	c.1852C>T		p.R618*			0.0006	-0.0632155	1	2
EFCAB5	17	28381130	G	T	StopGain	NM_198529	c.2158G>T		p.E720*			0	0.214265	0	1
EFCAB5	17	28382945	AA	A	Frameshift	NM_198529	c.2235delA	c.2234delA				0	0.597158	0	3
EFCAB5	17	28384706	TT	T	Frameshift	NM_198529	c.2379delT	c.2378delT				9e-06	-0.0224331	1	0
EFCAB5	17	28384909	G	A	SpliceSite	NM_198529	c.2580+1G>A					0.00015	0.24556	2	1
EFCAB5	17	28386572	AA	A	Frameshift	NM_198529	c.2591delA	c.2588delA				0	-0.119897	0	1
EFCAB5	17	28386702	AA	A	Frameshift	NM_198529	c.2721delA	c.2717delA				0	0.583235	0	1
EFCAB5	17	28407111	A	T	StopGain	NM_198529	c.3049A>T		p.K1017*			0	0.60412	1	0
EGFR	7	55240664	ACCTCATTCCA	A	Intronic	NM_005228	c.1920-11_1920-2delCCTCATTCCA	c.1920-15_1920-6delTCCACCTCAT				0	0.625005	1	0
EHHADH	3	184922248	C	T	StopGain	NM_001966	c.866G>A		p.W289*			0	0.618043	0	1
EHHADH	3	184922258	C	A	StopGain	NM_001966	c.856G>T		p.G286*			6.4e-05	0.492099	0	2
EHHADH	3	184922518	CAG	C	Frameshift	NM_001966	c.594_595delCT	c.592_593delCT				0.00015	0.182905	1	0
EML5	14	89082577	T	A	StopGain	NM_183387	c.5806A>T		p.K1936*	rs756134753	0.000124814	0.00023	0.42162	1	1
EML5	14	89085106	ACT	A	Frameshift	NM_183387	c.5424_5425delAG					0	0.625005	0	0
EML5	14	89105253	T	A	SpliceSite	NM_183387	c.4238-2A>T					0	0.625005	0	1
EML5	14	89153669	CCCCTATGG	C	SpliceSite	NM_183387	c.2743-6_2744delCCATAGGG			rs775589897	0.0003263	0	0.625005	1	13
EML5	14	89163190	C	T	SpliceSite	NM_183387	c.2344+1G>A					0	0.625005	0	1
EML5	14	89163251	T	A	StopGain	NM_183387	c.2284A>T		p.K762*			0	0.625005	1	0
EML5	14	89168868	CTG	C	Frameshift	NM_183387	c.2158_2159delCA	c.2153_2154delAC				0	0.625005	1	0
EML5	14	89171203	C	A	SpliceSite	NM_183387	c.2051+1G>T					0	0.625005	0	1
EML5	14	89171831	G	A	StopGain	NM_183387	c.1927C>T		p.R643*	rs753814190	1.32284e-05	0	0.625005	1	0
EML5	14	89172662	AAGAC	A	Frameshift	NM_183387	c.1762_1765delGTCT	c.1759_1762delTCTG				0	0.625005	0	1
EML5	14	89178773	C	T	StopGain	NM_183387	c.1499G>A		p.W500*			0	0.625005	1	0
EML5	14	89202706	A	ATGCTTA	Intronic	NM_183387	c.1049+1_1049+2insTAAGCA	c.1049+7_1049+8insTAAGCA				4.5e-05	0.534189	1	0
EML5	14	89258754	C	CAGTGTAGG	Frameshift	NM_183387	c.93_94insCCTACACT	c.86_87insCTACACTC				0	0.625005	1	0
ENO3	17	4856092	C	T	StopGain	NM_001976	c.88C>T		p.R30*			7e-05	0.4895	3	0
ENO3	17	4858701	G	A	SpliceSite	NM_001976	c.668-1G>A					0	0.381346	1	0
ENO3	17	4858741	A	ATCCAGGCGGCTGGTTA	Frameshift	NM_001976	c.707_708insTCCAGGCGGCTGGTTA	c.690_691insATCCAGGCGGCTGGTT				0.00018	0.388795	3	0
ENO3	17	4859300	G	GCGGG	Frameshift	NM_001976	c.929_930insCGGG	c.925_926insCGGG				2.7e-05	0.0446458	2	2
ENO3	17	4859893	T	TT	Frameshift	NM_001976	c.1093_1094insT	c.1092_1093insT				0.00027	0.376083	1	3
ENO3	17	4860143	C	CC	Frameshift	NM_001976	c.1194_1195insC	c.1189_1190insC				0.00028	0.228928	2	3
EPCAM	2	47602376	G	A	StopGain	NM_002354	c.429G>A		p.W143*			1.8e-05	0.607262	1	1
EPCAM	2	47606907	G	A	SpliceSite	NM_002354	c.658-1G>A					0	0.269958	0	1
EPCAM	2	47607109	G	C	SpliceSite	NM_002354	c.858+1G>C					9.5e-06	0.437039	0	1
EPHA10	1	38185209	AGTCG	A	StopGain	NM_001099439	c.2629_2632delCGAC	c.2627_2630delACCG	p.R877_V1008del			1.8e-05	0.614224	0	1
EPHA10	1	38185213	G	A	StopGain	NM_001099439	c.2629C>T		p.R877*			0.00046	0.395268	1	0
EPHA10	1	38185697	C	A	StopGain	NM_001099439	c.2446G>T		p.E816*			0.00015	0.440488	3	1
EPHA10	1	38186150	G	C	StopGain	NM_001099439	c.2285C>G		p.S762*			1.8e-05	0.614224	1	0
EPHA10	1	38187470	G	A	StopGain	NM_001099439	c.2008C>T		p.Q670*			0	0.506656	0	1
EPHA10	1	38188803	G	A	StopGain	NM_001099439	c.1870C>T		p.Q624*			0	0.513618	0	2
EPHA10	1	38200940	A	ATCGGATC	Frameshift	NM_001099439	c.1479_1480insGATCCGA	c.1469_1470insCGAGATC				5.9e-05	0.184707	1	1
EPHA10	1	38218839	G	A	StopGain	NM_001099439	c.1066C>T		p.R356*			0.0031	0.192241	0	0
EPHA10	1	38218900	T	A	SpliceSite	NM_001099439	c.1007-2A>T					0	0.214265	1	0
EPHA10	1	38219893	AG	A	Frameshift	NM_001099439	c.999delC	c.998delC				0	0.36046	1	0
EPHA10	1	38220032	TG	T	Frameshift	NM_001099439	c.860delC	c.856delC				0	0.395269	1	1
EPHA10	1	38220043	C	G	SpliceSite	NM_001099439	c.851-1G>C					0.00046	0.0123745	0	2
EPHA10	1	38227085	AAG	A	Frameshift	NM_001099439	c.840_841delCT					9.1e-06	0.137686	0	1
EPHA10	1	38227088	TC	T	Frameshift	NM_001099439	c.838delG					0	0.137686	0	1
EPHA10	1	38227651	C	T	StopGain	NM_001099439	c.276G>A		p.W92*			0	0.555388	1	0
EPN3	17	48614024	C	CC	StopGain	NM_017957	c.107_108insC	c.101_102insC	p.P36_L632delinsP			0	0.256035	0	1
EPN3	17	48614205	C	A	StopGain	NM_017957	c.288C>A		p.C96*	rs140833430	7.07364e-06	6.5e-05	0.408129	0	1
EPN3	17	48614227	C	T	StopGain	NM_017957	c.310C>T		p.Q104*			0	0.576273	1	0
EPN3	17	48614347	C	T	StopGain	NM_017957	c.430C>T		p.R144*	rs371019202	2.00157e-05	5.8e-05	0.402838	1	0
EPN3	17	48615439	G	T	SpliceSite	NM_017957	c.563-1G>T					0	0.19338	1	0
EPN3	17	48616255	C	CC	Frameshift	NM_017957	c.692_693insC	c.686_687insC				0.0003	-0.309061	4	7
EPN3	17	48616638	GAA	G	Frameshift	NM_017957	c.854_855delAA					0	0.583235	1	0
EPN3	17	48617604	ACA	A	Intronic	NM_017957	c.892-3_892-2delCA	c.892-5_892-4delCA				0	0.221226	0	1
EPN3	17	48618325	CC	C	Frameshift	NM_017957	c.1152delC	c.1147delC				9e-05	-0.21572	2	2
EPN3	17	48618362	CAAACTCCCCAGCAC	C	Frameshift	NM_017957	c.1189_1202delAAACTCCCCAGCAC	c.1186_1199delCACAAACTCCCCAG				0.00086	0.28417	10	5
EPN3	17	48619037	CGGAACCCC	C	Frameshift	NM_017957	c.1568_1575delGGAACCCC	c.1565_1572delCCCGGAAC				0.0004	-0.00716818	3	4
EPN3	17	48619057	T	C	SpliceSite	NM_017957	c.1585+2T>C			rs148199218	1.59682e-05	0.00013	0.0634266	1	0
EPS8L2	11	721954	A	AA	Frameshift	NM_022772	c.947_948insA	c.946_947insA				0	0.60412	1	0
EPS8L2	11	722766	C	CAGCCGCTG	Frameshift	NM_022772	c.1302_1303insAGCCGCTG					0	0.60412	1	0
EPS8L2	11	723329	C	CC	Frameshift	NM_022772	c.1430_1431insC	c.1428_1429insC				0.00074	0.343304	5	2
EPS8L2	11	726691	GTG	G	Frameshift	NM_022772	c.2008_2009delTG	c.2005_2006delGT				0	0.60412	0	1
ERCC2	19	45855465	AC	A	Intronic	NM_000400	c.2190+1delG	c.2189delG		rs1476160722	7.1e-06	9e-06	0.381346	0	1
ERCC2	19	45855466	C	G	SpliceSite	NM_000400	c.2190+1G>C					0	0.367422	0	1
ERCC2	19	45855514	G	A	StopGain	NM_000400	c.2143C>T		p.Q715*	rs774392894	1.19391e-05	0.00012	0.405223	1	0
ERCC2	19	45855803	CCT	C	Frameshift	NM_000400	c.2005_2006delAG			rs757535186	1.59132e-05	3e-05	0.414159	0	2
ERCC2	19	45856038	A	AC	Frameshift	NM_000400	c.1867_1868insG	c.1866_1867insG		rs756630156	5.69878e-05	0.00011	0.349785	2	1
ERCC2	19	45856344	AG	A	Frameshift	NM_000400	c.1827delC			rs769426415	7.98977e-06	1.8e-05	0.530684	0	1
ERCC2	19	45856553	TAA	T	Frameshift	NM_000400	c.1703_1704delTT	c.1702_1703delTT		rs74792417	0.00010263	0.00047	0.289406	5	1
ERCC2	19	45858987	C	G	SpliceSite	NM_000400	c.1480-1G>C			rs375284572	2.12172e-05	5.4e-05	0.335144	0	1
ERCC2	19	45864889	T	TC	Frameshift	NM_000400	c.1129_1130insG	c.1128_1129insG				0	0.618043	1	0
ERCC2	19	45867102	G	C	StopGain	NM_000400	c.1017C>G		p.Y339*			0	0.262997	0	1
ERCC2	19	45867120	C	CAGGAAGCCCAGGAAATGCT	Frameshift	NM_000400	c.998_999insAGCATTTCCTGGGCTTCCT	c.979_980insAGCATTTCCTGGGCTTCCT				0	0.374384	0	1
ERCC2	19	45868090	CCTCA	C	Intronic	NM_000400	c.594+2_594+5delTGAG	c.594_594+3delAGTG		rs750963665	7.44327e-05	0.00013	0.167852	0	1
ERCC2	19	45868123	C	T	StopGain	NM_000400	c.567G>A		p.W189*	rs377532898	7.97035e-06	1.8e-05	0.607262	0	1
ERCC2	19	45868311	G	A	StopGain	NM_000400	c.466C>T		p.R156*	rs151235136	1.7735e-05	0	0.576273	1	0
ERCC2	19	45872326	A	T	SpliceSite	NM_000400	c.183+2T>A			rs201127596	1.06127e-05	6.5e-05	0.261933	1	0
ERCC2	19	45873792	A	G	SpliceSite	NM_000400	c.5+2T>C					0	0.381346	1	0
ERCC4	16	14024648	C	T	StopGain	NM_005236	c.874C>T		p.R292*			3.6e-05	0.43867	0	1
ERCC4	16	14029239	ACCCTC	A	Frameshift	NM_005236	c.1451_1455delCCCTC					0	0.513618	2	1
ERCC4	16	14029272	ACTCAA	A	Frameshift	NM_005236	c.1484_1488delCTCAA	c.1482_1486delAACTC				3e-05	0.476815	0	1
ERCC4	16	14029439	CC	C	Frameshift	NM_005236	c.1651delC	c.1648delC				0	0.325652	0	1
ERCC4	16	14038636	T	G	StopGain	NM_005236	c.1961T>G		p.L654*			0	0.618043	1	0
ERCC4	16	14038657	C	CC	Frameshift	NM_005236	c.1982_1983insC	c.1981_1982insC				0	-0.126859	1	0
ERCC6	10	50668473	AT	A	Frameshift	NM_000124	c.4007delA	c.4006delA				0	0.625005	0	1
ERCC6	10	50669427	CCT	C	Frameshift	NM_000124	c.3952_3953delAG					4.5e-05	0.534189	1	0
ERCC6	10	50678469	AT	A	Frameshift	NM_000124	c.3536delA					0	0.625005	1	1
ERCC6	10	50680981	CTGGGTCATAGA	C	Frameshift	NM_000124	c.2792_2802delTCTATGACCCA	c.2790_2800delCATCTATGACC				9e-06	0.625005	0	1
ERCC6	10	50682102	G	A	StopGain	NM_000124	c.2569C>T		p.R857*			6e-05	0.502586	1	1
ERCC6	10	50684358	T	C	SpliceSite	NM_000124	c.2287-2A>G					2.7e-05	0.580697	1	1
ERCC6	10	50686483	G	A	StopGain	NM_000124	c.2203C>T		p.R735*			0.00021	0.426796	2	1
ERCC6	10	50686518	T	C	SpliceSite	NM_000124	c.2170-2A>G					9e-06	0.625005	0	1
ERCC6	10	50690805	C	CG	Frameshift	NM_000124	c.2096_2097insC	c.2095_2096insC				1.8e-05	0.614224	1	0
ERCC6	10	50690855	G	A	StopGain	NM_000124	c.2047C>T		p.R683*			5.8e-05	0.507263	1	0
ERCC6	10	50691564	T	G	SpliceSite	NM_000124	c.1822-2A>C					0	0.625005	1	0
ERCC6	10	50701162	C	T	SpliceSite	NM_000124	c.1821+1G>A					9e-06	0.625005	0	1
ERCC6	10	50708719	C	T	StopGain	NM_000124	c.1550G>A		p.W517*			0	0.625005	0	1
ERCC6	10	50708744	T	C	SpliceSite	NM_000124	c.1527-2A>G					0	0.625005	1	0
ERCC6	10	50732307	C	CAAGGG	Frameshift	NM_000124	c.1168_1169insCCCTT					0	0.625005	0	2
ERCC6	10	50732583	G	GT	Frameshift	NM_000124	c.892_893insA					0	0.625005	1	0
FAM83B	6	54791298	ACTGA	A	Frameshift	NM_001010872	c.575_578delCTGA	c.572_575delTGAC				9e-06	0.625005	0	1
FANCA	16	89805867	GCCCTGTGGGTGGAGGTAC	G	Intronic	NM_000135	c.4010+1_4010+18delGTACCTCCACCCACAGGG	c.4010_4010+17delGGTACCTCCACCCACAGG				5.1e-05	0.243972	1	0
FANCA	16	89809230	TTCTTTAGCTGCTTCCTGATG	T	Frameshift	NM_000135	c.3723_3742delCATCAGGAAGCAGCTAAAGA	c.3722_3741delACATCAGGAAGCAGCTAAAG				0	0.416154	1	0
FANCA	16	89811434	T	TC	Frameshift	NM_000135	c.3558_3559insG	c.3556_3557insG				3.6e-05	0.236781	0	1
FANCA	16	89813033	T	A	StopGain	NM_000135	c.3472A>T		p.K1158*			0	0.207303	0	0
FANCA	16	89831296	A	G	SpliceSite	NM_000135	c.2778+2T>C					9e-06	0.0889541	0	1
FANCA	16	89836570	TCAC	T	Intronic	NM_000135	c.2316+1_2316+3delGTG	c.2316_2316+2delGGT				0	0.221226	0	1
FANCA	16	89837011	TGACAGAAA	T	Frameshift	NM_000135	c.2175_2182delTTTCTGTC	c.2172_2179delGTCTTTCT				0	0.583235	0	1
FANCA	16	89845356	G	A	StopGain	NM_000135	c.1771C>T		p.R591*			0	0.56235	0	1
FANCA	16	89849277	TC	T	Frameshift	NM_000135	c.1615delG	c.1612delG				7.2e-05	-0.0613516	0	1
FANCA	16	89849456	CTG	C	Frameshift	NM_000135	c.1523_1524delCA	c.1521_1522delCA				0	0.297805	0	1
FANCA	16	89851268	G	C	StopGain	NM_000135	c.1464C>G		p.Y488*			0	0.60412	0	0
FANCA	16	89857817	C	T	StopGain	NM_000135	c.1353G>A		p.W451*			0	0.618043	1	0
FANCA	16	89858441	GCCAA	G	Frameshift	NM_000135	c.1115_1118delTTGG	c.1110_1113delGTTG				0.00013	-0.0340372	0	1
FANCA	16	89865605	C	A	StopGain	NM_000135	c.862G>T		p.E288*			0.00013	0.133044	2	2
FANCA	16	89865611	G	A	StopGain	NM_000135	c.856C>T		p.Q286*			0	0.437039	1	0
FANCA	16	89869702	GA	G	StopGain	NM_000135	c.756delT		p.D252_F1455delinsD			0	-0.105973	0	1
FANCA	16	89882959	C	T	StopGain	NM_000135	c.65G>A		p.W22*			2.5e-05	0.303488	0	1
FANCA	16	89882973	GC	G	Frameshift	NM_000135	c.50delG	c.46delG				0	-0.00154796	1	0
FANCC	9	97869488	G	A	StopGain	NM_001243743	c.1393C>T		p.Q465*			0	0.158571	1	0
FANCC	9	97869492	TGA	T	Frameshift	NM_001243743	c.1387_1388delTC	c.1384_1385delCT				9e-06	0.513618	1	0
FANCC	9	97873771	C	CA	Frameshift	NM_001243743	c.1302_1303insT	c.1301_1302insT				9e-06	0.0332605	2	2
FANCC	9	97876979	TC	T	Frameshift	NM_001243743	c.1085delG	c.1082delG				0	0.353499	1	0
FANCC	9	97887367	C	A	SpliceSite	NM_001243743	c.996+1G>T					3e-05	0.233155	1	0
FANCC	9	97897626	A	G	SpliceSite	NM_001243743	c.843+2T>C					0	0.332614	0	1
FANCC	9	97912338	G	A	StopGain	NM_001243743	c.553C>T		p.R185*			0.00013	0.383665	0	1
FANCC	9	97912356	G	A	StopGain	NM_001243743	c.535C>T		p.R179*			1.8e-05	0.356641	1	0
FANCC	9	97933374	TA	T	Frameshift	NM_001243743	c.507delT	c.505delT				0	-0.00154796	0	1
FANCC	9	97934319	A	AT	Frameshift	NM_001243743	c.455_456insA	c.450_451insA				2.7e-05	0.378807	0	2
FANCC	9	98009800	T	C	SpliceSite	NM_001243743	c.166-2A>G					3e-05	0.0382275	1	0
FANCC	9	98011506	TC	T	Frameshift	NM_001243743	c.67delG	c.65delG				0.00029	0.374158	4	8
FANCC	9	98011508	C	T	StopGain	NM_001243743	c.66G>A		p.W22*			9e-06	0.583235	1	0
FANCD2OS	3	10145970	A	T	StopGain	NM_173472	c.489T>A		p.Y163*			0.00015	0.356948	1	2
FANCD2OS	3	10146079	C	CA	Frameshift	NM_173472	c.379_380insT	c.375_376insT				0.0015	0.294379	1	0
FANCM	14	45605626	G	A	StopGain	NM_020937	c.392G>A		p.W131*			0	0.625005	0	1
FANCM	14	45606310	AGT	A	Frameshift	NM_020937	c.548_549delGT					0	0.625005	1	0
FANCM	14	45609831	TAAGG	T	SpliceSite	NM_020937	c.682-3_682delAAGG					0	0.625005	5	7
FANCM	14	45620668	AA	A	Frameshift	NM_020937	c.988delA	c.987delA				0	0.625005	0	1
FANCM	14	45624001	AA	A	Frameshift	NM_020937	c.1286delA	c.1284delA				0	0.625005	1	0
FANCM	14	45628298	G	T	SpliceSite	NM_020937	c.1397-1G>T					0	0.625005	0	1
FANCM	14	45628358	C	T	StopGain	NM_020937	c.1456C>T		p.R486*			0	0.625005	1	1
FANCM	14	45628440	C	G	StopGain	NM_020937	c.1538C>G		p.S513*			0	0.625005	1	0
FANCM	14	45633697	C	T	StopGain	NM_020937	c.1717C>T		p.R573*			3.2e-05	0.557578	0	1
FANCM	14	45633706	A	T	StopGain	NM_020937	c.1726A>T		p.R576*			0	0.625005	0	1
FANCM	14	45636336	C	T	StopGain	NM_020937	c.1972C>T		p.R658*			0.00015	0.44745	5	1
FANCM	14	45639839	G	T	StopGain	NM_020937	c.2050G>T		p.E684*			0	0.625005	1	0
FANCM	14	45644460	G	T	StopGain	NM_020937	c.2503G>T		p.E835*			0	0.625005	0	1
FANCM	14	45645045	C	T	StopGain	NM_020937	c.3088C>T		p.R1030*			9e-06	0.625005	1	0
FANCM	14	45645545	TG	T	Frameshift	NM_020937	c.3589delG					0	0.625005	1	0
FANCM	14	45645890	ACTGAGTGCAGC	A	Frameshift	NM_020937	c.3934_3944delCTGAGTGCAGC					0	0.625005	0	1
FANCM	14	45645935	TCA	T	Frameshift	NM_020937	c.3979_3980delCA					9e-06	0.625005	1	0
FANCM	14	45645947	ACCAGTGC	A	Frameshift	NM_020937	c.3991_3997delCCAGTGC					0	0.625005	1	0
FANCM	14	45654440	AG	A	Frameshift	NM_020937	c.4537delG					0	0.625005	0	1
FANCM	14	45658155	C	T	StopGain	NM_020937	c.4930C>T		p.R1644*			9e-06	0.625005	0	1
FANCM	14	45658272	AAAAGA	A	Frameshift	NM_020937	c.5048_5052delAAAGA	c.5047_5051delAAAAG				9e-06	0.625005	0	1
FANCM	14	45658326	C	T	StopGain	NM_020937	c.5101C>T		p.Q1701*			0.0013	0.329504	13	11
FANCM	14	45658421	A	AGCAGAGCAAA	Frameshift	NM_020937	c.5196_5197insGCAGAGCAAA	c.5180_5181insAGCAAAGCAG				0	0.625005	0	1
FANCM	14	45667899	T	TT	Frameshift	NM_020937	c.5769_5770insT	c.5768_5769insT				0	0.625005	0	0
FANCM	14	45667921	C	T	StopGain	NM_020937	c.5791C>T		p.R1931*			0.0019	0.306343	10	8
FARP2	2	242312582	CC	C	Frameshift	NM_014808	c.61delC	c.59delC				0	0.527541	0	1
FARP2	2	242312583	C	T	StopGain	NM_014808	c.61C>T		p.Q21*			5.6e-05	0.414316	1	1
FARP2	2	242312629	T	A	StopGain	NM_014808	c.107T>A		p.L36*			9.3e-06	0.214265	0	1
FARP2	2	242312662	GAG	G	Frameshift	NM_014808	c.141_142delAG	c.139_140delAG				0	0.464886	1	0
FARP2	2	242343336	C	T	StopGain	NM_014808	c.277C>T		p.Q93*			0	0.374384	0	1
FARP2	2	242344253	C	T	StopGain	NM_014808	c.328C>T		p.R110*			5.8e-05	0.479416	1	0
FARP2	2	242373601	T	TT	Frameshift	NM_014808	c.896_897insT	c.891_892insT				9e-06	0.597158	0	1
FARP2	2	242374388	AGA	A	Frameshift	NM_014808	c.1044_1045delGA	c.1043_1044delAG				9.1e-06	0.618043	1	0
FARP2	2	242380808	CT	C	Frameshift	NM_014808	c.1249delT					0	0.00541374	0	1
FARP2	2	242380916	C	CTGGAGGC	Frameshift	NM_014808	c.1356_1357insTGGAGGC	c.1346_1347insGGCTGGA				6.5e-05	-0.155769	0	1
FARP2	2	242401936	A	G	SpliceSite	NM_014808	c.1588-2A>G					6.3e-05	0.123557	4	0
FARP2	2	242402794	TCT	T	Frameshift	NM_014808	c.1723_1724delCT	c.1721_1722delCT				1.8e-05	0.34968	1	0
FARP2	2	242403313	G	A	SpliceSite	NM_014808	c.1812-1G>A					0	0.332614	0	1
FARP2	2	242407681	CTC	C	Frameshift	NM_014808	c.2021_2022delTC	c.2018_2019delCT				0.00019	0.24608	7	2
FARP2	2	242407736	TG	T	Frameshift	NM_014808	c.2076delG					0	0.444001	0	1
FARP2	2	242429411	ACT	A	Frameshift	NM_014808	c.2457_2458delCT					2.7e-05	0.357922	1	1
FARP2	2	242430938	C	CC	Frameshift	NM_014808	c.2631_2632insC	c.2626_2627insC				1.8e-05	-0.207256	1	0
FARP2	2	242432711	G	GG	Frameshift	NM_014808	c.2899_2900insG	c.2898_2899insG				0	0.0193371	0	1
FARP2	2	242432783	AAA	A	Frameshift	NM_014808	c.2972_2973delAA	c.2971_2972delAA				1.8e-05	0.509799	2	0
FBXO11	2	48046002	ACCT	A	SpliceSite	NM_025133	c.1669-2_1669delAGG					0	0.625005	0	1
FGFR3	4	1801540	GTAGG	G	Intronic	NM_000142	c.445+2_445+5delTAGG	c.444_445+2delAGGT				0.0002	0.395662	0	0
FGFR3	4	1808662	G	GAGTACC	Intronic	NM_000142	c.2274+1_2274+2insAGTACC					0	0.590197	0	1
FHL3	1	38463533	G	A	StopGain	NM_004468	c.511C>T		p.Q171*			3.2e-05	0.529731	1	0
FHL3	1	38464742	GT	G	Frameshift	NM_004468	c.234delA	c.233delA				9e-06	0.597158	0	1
FHL3	1	38465083	A	G	Translation	NM_004468	c.2T>C		p.M1T			0	0.597158	1	0
FIGNL1	7	50514796	CT	C	Frameshift	NM_001287492	c.189delA					4.5e-05	0.534189	0	1
FOXM1	12	2974520	C	T	SpliceSite	NM_202002	c.1020+1G>A					0	0.625005	1	0
FRMPD1	9	37729761	C	T	StopGain	NM_014907	c.649C>T		p.R217*			0	0.625005	0	1
FRMPD1	9	37732426	AAAGTA	A	Frameshift	NM_014907	c.985_989delAAGTA	c.983_987delTAAAG				0	0.625005	0	1
FRMPD1	9	37733588	C	T	StopGain	NM_014907	c.1114C>T		p.R372*			6.5e-05	0.498631	0	1
FRMPD1	9	37740256	GG	G	Frameshift	NM_014907	c.1732delG	c.1729delG				0	0.625005	1	0
FRMPD1	9	37740713	C	T	StopGain	NM_014907	c.2188C>T		p.Q730*			0	0.625005	1	0
FRMPD1	9	37740833	G	T	StopGain	NM_014907	c.2308G>T		p.E770*			2.7e-05	0.580697	1	0
GEN1	2	17942804	G	A	StopGain	NM_182625	c.303G>A		p.W101*			2.7e-05	0.316152	1	0
GEN1	2	17947853	ATGTTGACTGTTACACA	A	Frameshift	NM_182625	c.534_549delTGTTGACTGTTACACA	c.530_545delCACATGTTGACTGTTA				0	0.569311	0	1
GEN1	2	17952494	TCT	T	StopGain	NM_182625	c.743_744delCT	c.741_742delCT	p.S248_T908del			0	-0.17559	1	0
GEN1	2	17955601	TTGACCCATTATGACATGATAGA	T	StopGain	NM_182625	c.1136_1157delTGACCCATTATGACATGATAGA		p.L379_T908del			0	0.618043	1	0
GEN1	2	17955658	C	T	StopGain	NM_182625	c.1192C>T		p.Q398*			0	0.60412	0	1
GINS4	8	41393967	T	G	SpliceSite	NM_032336	c.183+2T>G					9e-05	0.487412	1	0
GINS4	8	41399508	A	G	SpliceSite	NM_032336	c.576-2A>G					0	0.625005	0	1
GNE	9	36219851	TGCCTCCC	T	Frameshift	NM_005476	c.1793_1799delGGGAGGC					0	0.625005	0	1
GNE	9	36222772	A	AA	Intronic	NM_005476	c.1633+1_1633+2insT	c.1633+2_1633+3insT				0	0.625005	0	1
GNE	9	36236917	C	CT	Frameshift	NM_005476	c.680_681insA	c.678_679insA				0	0.625005	0	1
GNE	9	36236961	C	CT	Frameshift	NM_005476	c.636_637insA	c.633_634insA				0	0.625005	1	0
GNE	9	36249331	G	A	StopGain	NM_005476	c.22C>T		p.R8*			1.8e-05	0.614224	0	1
GRM3	7	86468763	C	T	StopGain	NM_000840	c.1933C>T		p.R645*			0	0.625005	0	1
GRM6	5	178410127	CCCTCTGG	C	Frameshift	NM_000843	c.2213_2219delCCAGAGG	c.2210_2216delAGGCCAG				0.00011	0.447248	0	3
GRM6	5	178413166	G	A	StopGain	NM_000843	c.2089C>T		p.Q697*			3.3e-05	0.554949	1	0
GRM6	5	178413188	AG	A	Frameshift	NM_000843	c.2066delC	c.2062delC				0.00059	0.146399	1	0
GRM6	5	178413394	G	A	StopGain	NM_000843	c.1861C>T		p.R621*			0.00021	0.398949	7	1
GRM6	5	178413687	C	CCG	Frameshift	NM_000843	c.1567_1568insCG	c.1564_1565insGC				0	0.541465	1	0
GRM6	5	178416105	G	T	StopGain	NM_000843	c.1185C>A		p.Y395*			9e-06	0.56235	1	7
GRM6	5	178418561	CT	C	Intronic	NM_000843	c.722-2delA					3.2e-05	0.362651	2	0
GRM6	5	178418561	C	CC	Intronic	NM_000843	c.722-2_722-1insG	c.727_728insG				6.5e-05	0.303703	1	1
GRM6	5	178418877	G	A	StopGain	NM_000843	c.712C>T		p.R238*			3.3e-05	0.534064	2	0
GZMB	14	25101063	C	G	SpliceSite	NM_004131	c.600+1G>C					9e-06	0.207303	0	1
GZMB	14	25101223	C	T	StopGain	NM_004131	c.441G>A		p.W147*			9e-06	0.597158	0	1
GZMB	14	25103311	C	T	SpliceSite	NM_004131	c.55+1G>A					0	0.123763	1	0
HCAR1	12	123214083	G	GT	StopGain	NM_032554	c.803_804insA	c.802_803insA	p.Y268_H346del			0	0.618043	1	0
HCAR1	12	123214372	G	T	StopGain	NM_032554	c.515C>A		p.S172*			0	0.618043	0	1
HCAR1	12	123214565	CCG	C	Frameshift	NM_032554	c.320_321delCG					0.00012	0.460917	0	1
HCAR1	12	123214885	A	C	Translation	NM_032554	c.2T>G		p.M1R			0	0.618043	1	0
HIST1H4E/H4C5	6	26204874	T	A	Translation	NM_003545	c.2T>A		p.M1K			0	0.513618	2	0
HIST1H4E/H4C5	6	26204874	T	C	Translation	NM_003545	c.2T>C		p.M1T			8.2e-05	0.247447	0	1
HIST1H4E/H4C5	6	26204875	G	C	Translation	NM_003545	c.3G>C		p.M1I			4.6e-05	0.518379	1	3
HIST1H4E/H4C5	6	26204890	AGGCGGAA	A	Frameshift	NM_003545	c.19_25delGGCGGAA	c.17_23delAAGGCGG				0	0.576273	1	1
HIST1H4E/H4C5	6	26204942	C	T	StopGain	NM_003545	c.70C>T		p.R24*			0.00017	0.364339	1	1
HIST1H4E/H4C5	6	26204954	C	T	StopGain	NM_003545	c.82C>T		p.Q28*			6.5e-05	0.456861	1	0
HIST1H4E/H4C5	6	26205004	C	CT	StopGain	NM_003545	c.132_133insT		p.K45_G103del			0	0.597158	1	0
HIST1H4E/H4C5	6	26205116	GTGACAGCGATGGATGTGGTCTACGCGCTGAAGAGACAG	G	Frameshift	NM_003545	c.245_282delTGACAGCGATGGATGTGGTCTACGCGCTGAAGAGACAG	c.239_276delAGACAGTGACAGCGATGGATGTGGTCTACGCGCTGAAG				9e-06	0.583235	1	0
HIST1H4E/H4C5	6	26205139	C	A	StopGain	NM_003545	c.267C>A		p.Y89*			0.00012	0.3913	1	0
HLA-DRB5	6	32497979	C	CA	Frameshift	NM_002125	c.22_23insT					0	0.130724	1	1
HLA-DRB5	6	32497980	C	CATCCCAAACAT	Frameshift	NM_002125	c.21_22insATGTTTGGGAT	c.20_21insTATGTTTGGGA				0	0.130724	1	1
HLA-DRB5	6	32497982	G	GCCAGGCAGCCTGAGGCACACCATGCT	Frameshift	NM_002125	c.19_20insAGCATGGTGTGCCTCAGGCTGCCTGG					0	-0.112935	1	0
HLA-DRB5	6	32497984	G	GC	Frameshift	NM_002125	c.17_18insG					0	-0.0850884	31	21
HTN1	4	70921213	A	C	SpliceSite	NM_002159	c.103-2A>C					0	-0.440135	0	1
INPP5D	2	233986969	T	G	SpliceSite	NM_001017915	c.349+2T>G					0.0004	0.39661	5	4
INPP5D	2	234056124	C	T	StopGain	NM_001017915	c.829C>T		p.Q277*			0	0.618043	1	0
INPP5D	2	234056158	C	A	StopGain	NM_001017915	c.863C>A		p.S288*			0	0.618043	1	0
INPP5D	2	234106866	C	T	StopGain	NM_001017915	c.2734C>T		p.Q912*			9.7e-05	0.476962	1	0
IQGAP2	5	75866423	C	T	StopGain	NM_006633	c.322C>T		p.R108*			0.0004	0.403572	1	1
IQGAP2	5	75886302	T	TT	Frameshift	NM_006633	c.710_711insT	c.709_710insT				9e-06	0.625005	1	0
IQGAP2	5	75893413	A	T	StopGain	NM_006633	c.1057A>T		p.K353*			0	0.625005	0	1
IQGAP2	5	75902053	C	T	StopGain	NM_006633	c.1282C>T		p.Q428*			0.00019	0.434046	4	1
IQGAP2	5	75902129	G	A	SpliceSite	NM_006633	c.1357+1G>A					6.8e-05	0.497334	1	0
IQGAP2	5	75923322	C	T	StopGain	NM_006633	c.1609C>T		p.Q537*			0	0.625005	0	1
IQGAP2	5	75932860	GTCTAGTG	G	Frameshift	NM_006633	c.1783_1789delTCTAGTG	c.1781-3_1784delTAGTGTC				0	0.625005	0	1
IQGAP2	5	75950757	A	T	SpliceSite	NM_006633	c.2251-2A>T					0	0.625005	1	0
IQGAP2	5	75954282	A	G	SpliceSite	NM_006633	c.2321-2A>G					9e-06	0.625005	1	0
IQGAP2	5	75954413	CCAATCAACAGC	C	Frameshift	NM_006633	c.2451_2461delCAATCAACAGC	c.2449_2459delGCCAATCAACA				0	0.625005	1	0
IQGAP2	5	75969415	G	A	SpliceSite	NM_006633	c.3209+1G>A					0	0.625005	0	1
IQGAP2	5	75969815	C	A	StopGain	NM_006633	c.3248C>A		p.S1083*			0	0.625005	0	1
IQGAP2	5	75973174	CAG	C	SpliceSite	NM_006633	c.3660_3660+1delAG					9e-06	0.625005	0	1
IRAK4	12	44165169	G	A	SpliceSite	NM_001114182	c.307+1G>A					0	0.625005	0	1
IRAK4	12	44166127	C	G	StopGain	NM_001114182	c.452C>G		p.S151*			0	0.625005	1	0
IRAK4	12	44166166	G	A	SpliceSite	NM_001114182	c.490+1G>A					6.6e-05	0.4982	0	1
IRAK4	12	44166771	C	T	StopGain	NM_001114182	c.547C>T		p.R183*			5.8e-05	0.507263	0	1
IRAK4	12	44172041	C	T	StopGain	NM_001114182	c.877C>T		p.Q293*			0.00048	0.39238	9	9
IRAK4	12	44177519	C	T	StopGain	NM_001114182	c.1180C>T		p.Q394*			0	0.625005	0	1
ITGA10	1	145527996	TA	T	Frameshift	NM_003637	c.234delA					0	0.625005	1	0
ITGA10	1	145528004	G	GG	Frameshift	NM_003637	c.241_242insG	c.234_235insG				0	0.625005	1	1
ITGA10	1	145528253	G	A	SpliceSite	NM_003637	c.275-1G>A					0	0.625005	0	1
ITGA10	1	145530989	C	T	StopGain	NM_003637	c.721C>T		p.R241*			4.5e-05	0.534189	1	1
ITGA10	1	145532541	C	T	StopGain	NM_003637	c.994C>T		p.R332*			5.8e-05	0.507263	0	0
ITGA10	1	145533169	CC	C	Frameshift	NM_003637	c.1265delC	c.1260delC				6.5e-05	0.498631	1	0
ITGA10	1	145533516	AAAGA	A	Frameshift	NM_003637	c.1400_1403delAAGA	c.1396_1399delAAGA				0	0.625005	1	0
ITGA10	1	145534934	C	T	StopGain	NM_003637	c.1837C>T		p.R613*			6.5e-05	0.498631	2	1
ITGA10	1	145535817	C	T	StopGain	NM_003637	c.2005C>T		p.R669*			6.5e-05	0.498631	1	2
ITGA10	1	145537831	T	C	SpliceSite	NM_003637	c.2667+2T>C					1.8e-05	0.614224	1	0
ITGA10	1	145537988	G	A	SpliceSite	NM_003637	c.2668-1G>A					0	0.625005	1	0
ITGA10	1	145538066	G	T	SpliceSite	NM_003637	c.2744+1G>T					0	0.625005	1	1
ITGA10	1	145539053	G	GG	Frameshift	NM_003637	c.2993_2994insG	c.2988_2989insG				1.8e-05	0.614224	1	0
ITGA10	1	145539076	C	T	StopGain	NM_003637	c.3016C>T		p.Q1006*			0	0.625005	1	2
ITGA10	1	145539412	GC	G	Frameshift	NM_003637	c.3082delC					0	0.625005	0	1
ITGA10	1	145539721	C	CA	Frameshift	NM_003637	c.3153_3154insA					0	0.625005	0	1
ITGA10	1	145539791	C	T	StopGain	NM_003637	c.3223C>T		p.R1075*			0.00078	0.360812	2	2
KIF18A	11	28080477	AG	A	Frameshift	NM_031217	c.1943delC	c.1942delC				6.5e-05	0.498631	1	0
KIF18A	11	28110117	GAT	G	Frameshift	NM_031217	c.849_850delAT					9e-06	0.625005	0	1
KIF18A	11	28119169	C	A	SpliceSite	NM_031217	c.325+1G>T					0	0.625005	0	1
KIF18A	11	28119232	TCTGA	T	Frameshift	NM_031217	c.259_262delTCAG	c.255_258delTCAG				3.7e-05	0.548386	0	2
KIF4B	5	154394212	C	T	StopGain	NM_001099293	c.793C>T		p.R265*			3e-05	0.448968	1	1
KIF4B	5	154395103	A	T	StopGain	NM_001099293	c.1684A>T		p.K562*			9e-06	0.541465	0	2
KIF4B	5	154395107	A	AA	Frameshift	NM_001099293	c.1688_1689insA	c.1682_1683insA				5.8e-05	-0.174984	0	1
KIF4B	5	154395133	C	T	StopGain	NM_001099293	c.1714C>T		p.Q572*			0	0.555388	1	0
KIF4B	5	154395556	C	T	StopGain	NM_001099293	c.2137C>T		p.R713*			0.00032	0.329448	3	0
KIF4B	5	154395583	C	T	StopGain	NM_001099293	c.2164C>T		p.R722*			6.5e-05	0.387244	2	0
KIF4B	5	154395963	TA	T	Frameshift	NM_001099293	c.2545delA					0	0.0402222	1	0
KIF4B	5	154396257	GC	G	Frameshift	NM_001099293	c.2839delC					3e-05	0.29581	0	1
KRT36	17	39643281	G	A	StopGain	NM_003771	c.1129C>T		p.Q377*			0	0.492733	1	0
KRT36	17	39643710	G	A	StopGain	NM_003771	c.880C>T		p.Q294*			0.0016	0.297546	11	11
KRT36	17	39643729	C	T	SpliceSite	NM_003771	c.862-1G>A					0	0.102878	0	0
KRT36	17	39643956	G	A	StopGain	NM_003771	c.733C>T		p.R245*			6e-05	0.35639	0	1
KRT36	17	39644957	TCA	T	Frameshift	NM_003771	c.477_478delTG					0.00035	0.389096	1	1
KRT36	17	39645662	TG	T	Frameshift	NM_003771	c.454delC					0.0039	0.274023	17	19
KRT36	17	39645941	AG	A	Frameshift	NM_003771	c.175delC	c.174delC				0	0.0123754	1	0
KRT40	17	39137247	C	CA	Frameshift	NM_182497	c.843_844insT	c.842_843insT				0	0.625005	1	0
KRT40	17	39137262	C	A	StopGain	NM_182497	c.829G>T		p.E277*			0	0.625005	1	0
KRT40	17	39137370	G	GT	Frameshift	NM_182497	c.720_721insA					0	0.625005	1	1
KRT40	17	39137371	GTCGCC	G	Frameshift	NM_182497	c.715_719delGGCGA					0	0.625005	1	1
KRT40	17	39138631	G	T	StopGain	NM_182497	c.615C>A		p.C205*			0	0.625005	1	0
KRT40	17	39139337	AG	A	Frameshift	NM_182497	c.490delC					0	0.625005	0	1
KRT40	17	39140162	G	A	StopGain	NM_182497	c.364C>T		p.Q122*			0	0.625005	1	0
KRT40	17	39140420	CG	C	Frameshift	NM_182497	c.105delC	c.102delC				0	0.625005	0	0
KRT40	17	39140498	AGT	A	Frameshift	NM_182497	c.26_27delAC	c.21_22delCA				0	0.625005	0	1
KRT40	17	39140504	T	TACAC	Frameshift	NM_182497	c.21_22insGTGT					0	0.625005	1	0
LAMC3	9	133884921	CC	C	Frameshift	NM_006059	c.321delC	c.320delC				0	0.64589	1	0
LAMC3	9	133907448	CC	C	Frameshift	NM_006059	c.696delC	c.695delC				0	0.64589	1	0
LAMC3	9	133911720	G	A	SpliceSite	NM_006059	c.976+1G>A			rs201519274	2.47217e-05	6.5e-05	0.519516	1	0
LAMC3	9	133911720	G	C	SpliceSite	NM_006059	c.976+1G>C			rs201519274	4.0139e-05	9.5e-05	0.505934	7	4
LAMC3	9	133917066	CCCCCGCAG	C	Frameshift	NM_006059	c.1327_1334delCCCCGCAG					0	0.64589	1	0
LAMC3	9	133917075	TGGGCGCTG	T	Frameshift	NM_006059	c.1336_1343delGGGCGCTG					0	0.64589	1	0
LAMC3	9	133928278	CC	C	Frameshift	NM_006059	c.1866delC	c.1861delC				2.7e-05	0.601582	0	1
LAMC3	9	133932315	G	A	SpliceSite	NM_006059	c.1940-1G>A					0	0.64589	0	1
LAMC3	9	133936421	G	A	SpliceSite	NM_006059	c.2159-1G>A					0	0.64589	0	1
LAMC3	9	133942398	TC	T	Frameshift	NM_006059	c.2400delC					0	0.64589	1	0
LAMC3	9	133942571	C	T	StopGain	NM_006059	c.2572C>T		p.R858*	rs768306978	3.98264e-06	3.2e-05	0.578463	1	0
LAMC3	9	133945219	C	A	StopGain	NM_006059	c.3051C>A		p.Y1017*	rs537864425	4.68854e-06	1.1e-05	0.64589	1	0
LAMC3	9	133945232	G	T	StopGain	NM_006059	c.3064G>T		p.E1022*			0	0.64589	1	0
LAMC3	9	133954539	C	T	StopGain	NM_006059	c.3781C>T		p.Q1261*			0	0.64589	1	0
LAMC3	9	133954629	C	T	StopGain	NM_006059	c.3871C>T		p.R1291*	rs201793200	3.89778e-05	0.00013	0.481129	1	1
LDHD	16	75147769	C	A	SpliceSite	NM_194436	c.830-1G>T					0	0.590197	0	1
LDHD	16	75148063	CC	C	Intronic	NM_194436	c.630-1delG	c.630delG				1.8e-05	0.579416	1	0
LDHD	16	75149094	A	ACCT	Intronic	NM_194436	c.327+1_327+2insAGG	c.325_326insAGG				3.7e-05	0.513577	0	1
LIPC	15	58838105	G	GCG	Frameshift	NM_000236	c.739_740insCG	c.737_738insCG				0.00058	0.376906	5	6
LIPC	15	58853175	CA	C	Frameshift	NM_000236	c.1165delA					0	0.625005	1	0
LRIG3	12	59266599	C	T	SpliceSite	NM_153377	c.3116-1G>A					6.3e-05	0.499488	1	1
LRIG3	12	59276797	CT	C	Frameshift	NM_153377	c.1333delA	c.1332delA				0	0.625005	0	1
LRIG3	12	59279686	T	C	SpliceSite	NM_153377	c.1173-2A>G					0	0.625005	0	1
LRIG3	12	59308045	C	A	SpliceSite	NM_153377	c.308+1G>T					9e-06	0.625005	0	1
MAGI1	3	65369300	T	C	SpliceSite	NM_004742	c.2501-2A>G					0	0.625005	1	0
MAGI1	3	65372849	TTC	T	Frameshift	NM_004742	c.2467_2468delGA	c.2455_2456delGA				0	0.625005	1	1
MAGI1	3	65479298	G	A	StopGain	NM_004742	c.439C>T		p.R147*			9e-06	0.625005	1	0
MAGI1	3	66023715	A	ATG	Frameshift	NM_004742	c.268_269insCA	c.266_267insCA				0	0.625005	1	0
MAK	6	10784764	CCT	C	Frameshift	NM_005906	c.1356_1357delAG					2.7e-05	-0.164205	1	0
MAK	6	10791929	C	CTTTT	Frameshift	NM_005906	c.1294_1295insAAAA	c.1288_1289insAAAA				0	-0.0293948	0	1
MAK	6	10792027	AGT	A	Frameshift	NM_005906	c.1195_1196delAC					1.8e-05	0.0712116	2	0
MAK	6	10796323	G	A	StopGain	NM_005906	c.1051C>T		p.Q351*			9e-06	0.618043	1	0
MAK	6	10809079	G	C	StopGain	NM_005906	c.455C>G		p.S152*			9e-06	0.625005	0	1
MAP1S	19	17838782	G	GG	Frameshift	NM_018174	c.2589_2590insG	c.2587_2588insG				0	0.618043	0	1
MAPT	17	44051839	T	C	SpliceSite	NM_016835	c.307+2T>C					1e-05	0.625005	1	0
MAPT	17	44060582	C	T	StopGain	NM_016835	c.412C>T		p.R138*			0.001	0.340514	1	0
MAPT	17	44060598	C	CC	Frameshift	NM_016835	c.428_429insC	c.422_423insC				0	0.625005	2	2
MAPT	17	44067403	C	T	StopGain	NM_016835	c.1342C>T		p.R448*			9e-05	0.487412	1	1
MARCO	2	119726838	G	T	SpliceSite	NM_006770	c.199+1G>T					0	0.597158	1	0
MARCO	2	119727903	CTCAGAAC	C	Frameshift	NM_006770	c.414_420delTCAGAAC	c.412_418delACTCAGA				2.8e-05	0.548539	1	0
MARCO	2	119731914	C	T	StopGain	NM_006770	c.466C>T		p.Q156*			0	0.597158	1	0
MARCO	2	119732001	C	T	StopGain	NM_006770	c.553C>T		p.R185*			5.9e-05	0.477098	1	0
MARCO	2	119732017	G	A	SpliceSite	NM_006770	c.568+1G>A					9.1e-06	0.597158	1	0
MARCO	2	119732099	CCC	C	Frameshift	NM_006770	c.572_573delCC	c.570_571delCC				0	0.597158	1	1
MARCO	2	119732111	C	CC	Frameshift	NM_006770	c.583_584insC	c.579_580insC				0.00013	0.432397	0	1
MARCO	2	119735045	A	C	SpliceSite	NM_006770	c.614-2A>C					0	0.597158	1	0
MARCO	2	119748162	TAGGA	T	SpliceSite	NM_006770	c.1064-2_1065delAGGA					0	0.597158	0	1
MARCO	2	119749390	GC	G	Frameshift	NM_006770	c.1147delC					4e-05	0.515392	1	0
MARCO	2	119750702	G	T	StopGain	NM_006770	c.1255G>T		p.E419*			0	0.597158	0	1
MARCO	2	119750741	C	T	StopGain	NM_006770	c.1294C>T		p.R432*			0.00017	0.413071	1	0
MCM5	22	35802719	G	C	SpliceSite	NM_006739	c.596+1G>C					0	0.60412	0	1
MCM5	22	35804470	GG	G	Frameshift	NM_006739	c.667delG	c.666delG				0	0.60412	0	1
MED23	6	131913599	G	A	StopGain	NM_004830	c.3400C>T		p.Q1134*			0	0.625005	1	0
MED23	6	131914191	G	C	StopGain	NM_004830	c.3353C>G		p.S1118*	rs769471341	1.19414e-05	2.7e-05	0.580697	1	0
MED23	6	131917672	T	TGTGCTTG	Frameshift	NM_004830	c.2763_2764insCAAGCAC	c.2753_2754insCACCAAG		rs758828537	3.97867e-06	9e-06	0.625005	2	0
MED23	6	131919530	GA	G	Frameshift	NM_004830	c.2503delT	c.2500delT				0	0.625005	1	0
MED23	6	131919582	C	CCCTA	StopGain	NM_004830	c.2451_2452insTAGG	c.2448_2449insAGGT	p.A818_Q1368del			0	0.625005	1	0
MED23	6	131921294	TA	T	Frameshift	NM_004830	c.2103delT	c.2097delT		rs1419084791	3.98664e-06	0	0.625005	0	1
MED23	6	131925317	C	T	SpliceSite	NM_004830	c.1756+1G>A					0	0.625005	0	1
MED23	6	131925458	AGGCTGAGG	A	SpliceSite	NM_004830	c.1614-6_1615delCCTCAGCC					0	0.625005	14	10
MED23	6	131929202	G	A	StopGain	NM_004830	c.1087C>T		p.R363*			0	0.625005	0	1
MED23	6	131931254	G	A	StopGain	NM_004830	c.1009C>T		p.Q337*	rs762706206	7.95653e-06	1.8e-05	0.614224	0	0
MED23	6	131943020	C	T	SpliceSite	NM_004830	c.495+1G>A					0	0.625005	0	1
METTL2A	17	60501276	TA	T	Frameshift	NM_181725	c.14delA					0	0.625005	0	1
METTL2A	17	60518040	GAA	G	Frameshift	NM_181725	c.733_734delAA					0	0.625005	0	1
METTL2A	17	60522227	GG	G	Frameshift	NM_181725	c.840delG	c.839delG				0	0.625005	1	0
MICAL1	6	109766098	C	T	SpliceSite	NM_022765	c.2981+1G>A					6.5e-05	0.268895	0	1
MICAL1	6	109766112	C	A	StopGain	NM_022765	c.2968G>T		p.E990*			0	0.548426	0	1
MICAL1	6	109766481	G	A	StopGain	NM_022765	c.2800C>T		p.R934*			3.2e-05	0.425306	0	1
MICAL1	6	109767338	C	T	SpliceSite	NM_022765	c.2581+1G>A					2.2e-05	0.161775	1	1
MICAL1	6	109767450	CA	C	Frameshift	NM_022765	c.2469delT					0	-0.0433182	1	0
MICAL1	6	109768320	TCA	T	StopGain	NM_022765	c.2181_2182delTG	c.2179_2180delTG	p.C727_G1067del			3.6e-05	0.494364	1	0
MICAL1	6	109768579	GGTGTCAGGGGTACACCAGGCTCT	G	Frameshift	NM_022765	c.2028_2050delAGAGCCTGGTGTACCCCTGACAC	c.2027_2049delCAGAGCCTGGTGTACCCCTGACA				0.00051	0.12338	2	1
MICAL1	6	109768584	CAG	C	Frameshift	NM_022765	c.2044_2045delCT					0.0013	-0.408436	0	1
MICAL1	6	109769464	GCC	G	Frameshift	NM_022765	c.1795_1796delGG	c.1794_1795delGG				9e-06	0.123763	0	1
MICAL1	6	109769474	TCA	T	Frameshift	NM_022765	c.1785_1786delTG	c.1784_1785delGT				1.8e-05	0.335756	0	1
MICAL1	6	109769965	GCA	G	Frameshift	NM_022765	c.1632_1633delTG	c.1628_1629delTG				0	0.56235	1	0
MICAL1	6	109770602	C	G	SpliceSite	NM_022765	c.1516+1G>C					0	0.151609	1	0
MICAL1	6	109771289	C	T	SpliceSite	NM_022765	c.1192-1G>A					3e-05	0.316696	1	0
MICAL1	6	109772830	G	T	StopGain	NM_022765	c.906C>A		p.C302*			2.7e-05	0.385769	2	1
MICAL1	6	109774465	C	A	SpliceSite	NM_022765	c.571+1G>T					0.00075	-0.0265023	10	14
MICAL1	6	109774938	GT	G	Frameshift	NM_022765	c.368delA	c.367delA				2.7e-05	0.0655309	1	0
MICAL1	6	109775357	CAA	C	StopGain	NM_022765	c.41_42delTT	c.40_41delTT	p.F14_G1067del			0	0.576273	1	0
MLH1	3	37067313	CC	C	Frameshift	NM_000249	c.1225delC	c.1222delC				0	0.625005	1	0
MLH1	3	37090006	A	G	SpliceSite	NM_000249	c.1897-2A>G					9e-06	0.625005	0	1
MMP27	11	102564768	A	C	StopGain	NM_022122	c.1062T>G		p.Y354*			0	0.548426	1	0
MMP27	11	102573821	G	A	StopGain	NM_022122	c.370C>T		p.R124*			0.00013	0.126082	1	1
MMP27	11	102573851	T	C	SpliceSite	NM_022122	c.342-2A>G					9.2e-06	0.214265	1	1
MMP27	11	102575341	T	TGGGTGTCTTCATGATCTCAA	StopGain	NM_022122	c.267_268insTTGAGATCATGAAGACACCC	c.241_242insACACCCTTGAGATCATGAAG	p.R90_Q513delinsLRS			0	0.311729	0	1
MSH2	2	47639593	AA	A	Frameshift	NM_000251	c.687delA	c.681delA				0	0.625005	1	0
MSH2	2	47693863	CC	C	Frameshift	NM_000251	c.1578delC	c.1577delC				0	0.625005	1	0
MSH6	2	48010382	C	T	StopGain	NM_000179	c.10C>T		p.Q4*			3.7e-05	0.464845	1	2
MSH6	2	48018117	CT	C	Frameshift	NM_000179	c.313delT					0	0.569311	0	1
MSH6	2	48026014	C	T	StopGain	NM_000179	c.892C>T		p.R298*			6.5e-05	0.345473	1	0
MSH6	2	48026544	G	GTG	Frameshift	NM_000179	c.1422_1423insTG	c.1419_1420insGT				9e-06	0.583235	0	1
MSH6	2	48026749	AAA	A	Frameshift	NM_000179	c.1628_1629delAA	c.1627_1628delAA				0	0.569311	0	1
MSH6	2	48026905	TT	T	Frameshift	NM_000179	c.1784delT	c.1781delT				0	0.56235	1	0
MSH6	2	48027118	TCT	T	StopGain	NM_000179	c.1997_1998delCT	c.1996_1997delTC	p.S666_L1360del			0	0.485771	1	0
MSH6	2	48027853	C	T	StopGain	NM_000179	c.2731C>T		p.R911*			0	0.52058	1	0
MSH6	2	48027937	C	T	StopGain	NM_000179	c.2815C>T		p.Q939*			0	0.555388	1	0
MSH6	2	48032753	TAAGGTGAAAGTACA	T	SpliceSite	NM_000179	c.3557-3_3567delAAGGTGAAAGTACA					0	0.569311	4	15
MSH6	2	48033470	AAA	A	Frameshift	NM_000179	c.3775_3776delAA	c.3773_3774delAA				0	0.179456	0	1
MSH6	2	48033914	TAAGGGAAG	T	SpliceSite	NM_000179	c.4002-3_4006delAAGGGAAG					0.00014	0.354676	9	28
MST1L	1	17084018	A	AG	Frameshift	NM_001271733	c.1902_1903insC	c.1900_1901insC				0	-0.210399	1	0
MST1L	1	17084090	TA	T	StopGain	NM_001271733	c.1830delT		p.C610_G689del			0	-0.217361	5	5
MST1L	1	17084482	AGCATCTT	A	Frameshift	NM_001271733	c.1609_1615delAAGATGC	c.1608_1614delCAAGATG				0	-0.280016	1	1
MST1L	1	17084501	C	CACAAGGGAGGCTCA	StopGain	NM_001271733	c.1596_1597insTGAGCCTCCCTTGT		p.V533_G689del			0	-0.286978	1	0
MST1L	1	17084503	C	CAGGAGGAGAA	Frameshift	NM_001271733	c.1594_1595insTTCTCCTCCT					0	-0.321786	1	0
MST1L	1	17085050	C	CCT	Frameshift	NM_001271733	c.1424_1425insAG	c.1420_1421insAG				0	-0.210399	7	13
MST1L	1	17085525	A	AG	Frameshift	NM_001271733	c.1165_1166insC	c.1162_1163insC				0	-0.238246	1	2
MST1L	1	17085531	CTGGCGGGGCCGGGAG	C	Intronic	NM_001271733	c.1160+15_1161-2delCTCCCGGCCCCGCCA					0	-0.252169	1	2
MST1L	1	17085642	TC	T	Frameshift	NM_001271733	c.1078delG	c.1074delG				0	-0.238246	1	0
MST1L	1	17086850	CA	C	Frameshift	NM_001271733	c.473delT					2.8e-05	-0.22421	1	0
MST1L	1	17086948	A	AGGCCGTAAGGGTCGCCATCAGG	Frameshift	NM_001271733	c.375_376insCCTGATGGCGACCCTTACGGCC	c.374_375insCCCTGATGGCGACCCTTACGGC				0	-0.210399	0	0
MST1L	1	17086951	T	TA	StopGain	NM_001271733	c.372_373insT		p.N125_G689del			0	-0.210399	0	0
MST1L	1	17087540	AG	A	Frameshift	NM_001271733	c.124delC	c.123delC				0	-0.266093	3	2
MST1L	1	17090942	CA	C	Frameshift	NM_001271733	c.33delT					0	-0.412288	0	1
MTMR11	1	149901643	G	A	StopGain	NM_001145862	c.1813C>T		p.Q605*			0	0.618043	1	0
MTMR11	1	149901676	G	A	StopGain	NM_001145862	c.1780C>T		p.R594*	rs139642077	3.97785e-06	5.8e-05	0.458531	0	1
MTMR11	1	149901809	C	A	SpliceSite	NM_001145862	c.1648-1G>T			rs140863001	0.000176839	0.00043	-0.435919	4	1
MTMR11	1	149902319	G	A	StopGain	NM_001145862	c.1585C>T		p.Q529*		3.97757e-06	9e-06	0.583235	0	1
MTMR11	1	149902440	C	CACAAGGAG	Intronic	NM_001145862	c.1465-2_1465-1insCTCCTTGT			rs782346987	1.78716e-05	2.7e-05	0.0585692	0	1
MTMR11	1	149905298	CCAGG	C	Frameshift	NM_001145862	c.982_985delCCTG	c.975_978delCTGC				0	0.395269	0	1
MTMR11	1	149908526	G	GC	Frameshift	NM_001145862	c.14_15insG	c.7_8insG		rs587606143	0.00849157	0.0089	-0.0303676	90	70
MUTYH	1	45797186	T	TCC	Frameshift	NM_001128425	c.1228_1229insGG	c.1225_1226insGG				0.00089	0.0865081	0	1
MUTYH	1	45797371	AG	A	Frameshift	NM_001128425	c.1147delC	c.1145delC				0.00013	-0.228965	2	0
MUTYH	1	45797746	G	A	StopGain	NM_001128425	c.946C>T		p.Q316*			0	0.381346	0	1
MUTYH	1	45798308	G	A	StopGain	NM_001128425	c.628C>T		p.Q210*			9e-06	0.534503	0	1
MUTYH	1	45798350	C	A	StopGain	NM_001128425	c.586G>T		p.E196*			9e-06	0.583235	1	1
MUTYH	1	45799201	G	A	StopGain	NM_001128425	c.232C>T		p.Q78*			0	0.36046	1	0
MUTYH	1	45800061	A	G	SpliceSite	NM_001128425	c.157+2T>C					0	-0.00154796	0	1
MYH7B	20	33572519	G	GG	Intronic	NM_020884	c.774+1_774+2insG	c.770_771insG				6.6e-05	0.198847	1	0
MYH7B	20	33573901	A	T	SpliceSite	NM_020884	c.932-2A>T					0.00011	0.0156231	1	2
MYH7B	20	33573978	CAG	C	Frameshift	NM_020884	c.1008_1009delAG					0	0.56235	2	0
MYH7B	20	33575368	A	T	StopGain	NM_020884	c.1282A>T		p.K428*			0	0.541465	1	0
MYH7B	20	33575963	CAT	C	Frameshift	NM_020884	c.1612_1613delAT					0.0023	0.0756279	21	15
MYH7B	20	33576011	G	A	StopGain	NM_020884	c.1659G>A		p.W553*			2.7e-05	0.51108	0	1
MYH7B	20	33576039	C	T	StopGain	NM_020884	c.1687C>T		p.Q563*			6.5e-05	0.408129	0	1
MYH7B	20	33578047	C	CC	Frameshift	NM_020884	c.2037_2038insC	c.2031_2032insC				0	0.541465	1	0
MYH7B	20	33578056	GG	G	StopGain	NM_020884	c.2047delG	c.2044delG	p.V683_E1983del			0	0.0471839	0	1
MYH7B	20	33578089	CC	C	Frameshift	NM_020884	c.2080delC	c.2079delC				1.8e-05	0.558531	1	0
MYH7B	20	33578553	AA	A	Frameshift	NM_020884	c.2117delA	c.2116delA				0	0.527541	1	0
MYH7B	20	33578916	CC	C	Frameshift	NM_020884	c.2302delC	c.2301delC				3.1e-05	0.388495	1	0
MYH7B	20	33578925	G	A	SpliceSite	NM_020884	c.2309+1G>A					0	0.374384	1	0
MYH7B	20	33581136	G	A	SpliceSite	NM_020884	c.2434-1G>A					0	0.207303	1	0
MYH7B	20	33582204	TG	T	Intronic	NM_020884	c.2826+1delG					0	0.249073	0	1
MYH7B	20	33584261	CCG	C	Frameshift	NM_020884	c.3183_3184delCG					0	0.548426	0	1
MYH7B	20	33584265	GG	G	Frameshift	NM_020884	c.3187delG	c.3186delG				9e-06	0.569311	0	1
MYH7B	20	33585081	CT	C	Frameshift	NM_020884	c.3512delT					0	0.27692	2	1
MYH7B	20	33585117	AAGCAGCGTGCAGA	A	Frameshift	NM_020884	c.3548_3560delAGCAGCGTGCAGA	c.3545_3557delAGAAGCAGCGTGC				3.5e-05	0.496015	0	2
MYH7B	20	33585428	TCT	T	Frameshift	NM_020884	c.3859_3860delCT	c.3857_3858delCT				0.00026	0.0567965	3	4
MYH7B	20	33586609	C	T	StopGain	NM_020884	c.4207C>T		p.Q1403*			9e-06	0.541465	1	0
MYH7B	20	33586939	CC	C	Frameshift	NM_020884	c.4398delC	c.4397delC				2.8e-05	0.506769	0	1
MYH7B	20	33586956	ACAGA	A	Frameshift	NM_020884	c.4415_4418delCAGA	c.4410_4413delACAG				0.00033	0.3563	3	2
MYH7B	20	33587037	GAACGG	G	Frameshift	NM_020884	c.4496_4500delAACGG	c.4494_4498delGGAAC				3.8e-05	0.490999	0	1
MYH7B	20	33587592	AG	A	Intronic	NM_020884	c.4792-1delG					6.6e-05	0.198847	0	3
MYH7B	20	33588433	C	T	StopGain	NM_020884	c.5245C>T		p.R1749*			0.00031	0.302588	1	0
MYH7B	20	33588588	CC	C	Frameshift	NM_020884	c.5323delC	c.5322delC				9.1e-06	0.527541	0	1
MYH7B	20	33588590	AG	A	Frameshift	NM_020884	c.5325delG					1.8e-05	0.558531	2	5
MYH7B	20	33588809	G	T	StopGain	NM_020884	c.5449G>T		p.E1817*			0	0.576273	1	0
MYH7B	20	33589059	GGAGGCTG	G	Frameshift	NM_020884	c.5614_5620delGAGGCTG	c.5610_5616delGCTGGAG				0	0.56235	0	1
MYH7B	20	33589330	G	C	SpliceSite	NM_020884	c.5802+1G>C					3e-05	0.100883	0	1
NADSYN1	11	71164352	AA	A	Frameshift	NM_018161	c.11delA	c.10delA				0	0.618043	0	1
NADSYN1	11	71174491	C	T	StopGain	NM_018161	c.277C>T		p.R93*			0.00012	0.460917	1	1
NADSYN1	11	71192406	G	T	StopGain	NM_018161	c.1003G>T		p.G335*			0	0.618043	0	1
NADSYN1	11	71192439	C	T	StopGain	NM_018161	c.1036C>T		p.R346*			9.8e-05	0.476303	1	0
NADSYN1	11	71192451	G	GG	Intronic	NM_018161	c.1047+1_1047+2insG	c.1046_1047insG				0	0.618043	1	0
NADSYN1	11	71193951	C	CC	Frameshift	NM_018161	c.1207_1208insC	c.1201_1202insC				0.00029	0.408967	0	1
NADSYN1	11	71193960	C	T	StopGain	NM_018161	c.1216C>T		p.R406*			6.5e-05	0.491669	0	1
NADSYN1	11	71196591	C	T	StopGain	NM_018161	c.1459C>T		p.R487*			0	0.618043	3	0
NADSYN1	11	71208582	GG	G	Frameshift	NM_018161	c.1819delG	c.1818delG				9e-06	0.618043	1	0
NADSYN1	11	71208596	GG	G	Frameshift	NM_018161	c.1833delG	c.1830delG				3.6e-05	0.543096	5	1
NADSYN1	11	71209576	T	C	SpliceSite	NM_018161	c.2070+2T>C					3.6e-05	0.543096	1	2
NBN	8	90955525	G	A	StopGain	NM_002485	c.2140C>T		p.R714*			4.5e-05	0.471534	1	0
NBN	8	90958384	A	AAATTTTTTTTTTTTTTTT	StopGain	NM_002485	c.2053_2054insAAAAAAAAAAAAAAAATT	c.2045_2046insAAAAAATTAAAAAAAAAA	p.F685_R754del			0	0.374384	0	1
NBN	8	90958386	A	ATTTTTTTTTT	Frameshift	NM_002485	c.2051_2052insAAAAAAAAAA	c.2045_2046insAAAAAAAAAA				0	0.249073	1	9
NBN	8	90958396	TGACCATAATCATCA	T	Frameshift	NM_002485	c.2028_2041delTGATGATTATGGTC					0	0.499694	3	3
NBN	8	90960063	T	A	StopGain	NM_002485	c.1903A>T		p.K635*			0	0.576273	1	0
NBN	8	90967765	TG	T	Frameshift	NM_002485	c.1142delC	c.1141delC				4.5e-05	0.387993	0	1
NBN	8	90982678	AAC	A	Frameshift	NM_002485	c.808_809delGT	c.804_805delGT				9e-06	0.576273	0	1
NBN	8	90983401	CTGTT	C	Frameshift	NM_002485	c.698_701delAACA	c.696_699delCAAA				6.6e-05	0.491238	0	2
NBN	8	90983441	ATTTGT	A	Frameshift	NM_002485	c.657_661delACAAA	c.654_658delAAAAC				0.00053	0.329176	8	10
NBN	8	90994963	GAA	G	Frameshift	NM_002485	c.156_157delTT	c.154_155delTT				3.6e-05	-0.0347254	4	0
NBN	8	90995006	G	A	StopGain	NM_002485	c.115C>T		p.Q39*			0	0.513618	1	0
NCKAP1L	12	54903531	G	GG	Frameshift	NM_005337	c.585_586insG	c.582_583insG				0	0.625005	0	1
NCKAP1L	12	54905732	G	A	SpliceSite	NM_005337	c.785-1G>A					0	0.625005	1	0
NCKAP1L	12	54912443	TG	T	Frameshift	NM_005337	c.1348delG					0	0.625005	1	0
NCKAP1L	12	54917289	GAGAGTCAC	G	Frameshift	NM_005337	c.1991_1998delAGAGTCAC					0	0.625005	0	1
NCKAP1L	12	54926004	GG	G	Frameshift	NM_005337	c.2833delG	c.2832delG				0	0.625005	0	1
NCKAP1L	12	54932759	T	C	SpliceSite	NM_005337	c.3273+2T>C					0	0.625005	1	0
NEK1	4	170345703	C	G	SpliceSite	NM_012224	c.3138+1G>C					9.2e-06	0.625005	0	1
NEK1	4	170345819	G	C	StopGain	NM_012224	c.3023C>G		p.S1008*			0.00028	0.416894	2	1
NEK1	4	170359357	C	CT	Frameshift	NM_012224	c.2556_2557insA	c.2548_2549insA				0	0.625005	0	1
NEK1	4	170359412	T	C	SpliceSite	NM_012224	c.2504-2A>G					0.0014	0.325915	0	1
NEK1	4	170398425	CAGAG	C	Frameshift	NM_012224	c.2196_2199delCTCT	c.2193_2196delTCTC				0	0.625005	1	0
NEK1	4	170398437	G	A	StopGain	NM_012224	c.2188C>T		p.Q730*			0	0.625005	0	1
NEK1	4	170428209	TTC	T	Frameshift	NM_012224	c.1900_1901delGA	c.1894_1895delGA				3.3e-05	0.554949	0	1
NEK1	4	170428238	G	A	StopGain	NM_012224	c.1873C>T		p.R625*			6.7e-05	0.497768	0	1
NEK1	4	170428865	C	T	SpliceSite	NM_012224	c.1827+1G>A					0	0.625005	0	1
NEK1	4	170477099	G	A	StopGain	NM_012224	c.1414C>T		p.R472*			3.3e-05	0.554949	0	0
NEK1	4	170501992	C	G	SpliceSite	NM_012224	c.868+1G>C					0.0001	0.481938	0	1
NEK1	4	170509798	A	G	SpliceSite	NM_012224	c.551+2T>C					0	0.625005	0	1
NEK1	4	170509870	G	A	StopGain	NM_012224	c.481C>T		p.R161*			8.4e-05	0.490193	2	0
NEK1	4	170511876	C	A	SpliceSite	NM_012224	c.396+1G>T					0	0.625005	1	0
NEK1	4	170511894	G	A	StopGain	NM_012224	c.379C>T		p.R127*			7.2e-05	0.495584	1	0
NEK1	4	170520350	T	C	SpliceSite	NM_012224	c.215-2A>G					0	0.625005	0	1
NF1	17	29482997	TCAGC	T	SpliceSite	NM_000267	c.61-3_61delCAGC					0	0.402231	7	11
NF1	17	29546018	TGCAGAA	T	SpliceSite	NM_000267	c.1528-4_1529delGCAGAA					0	0.450963	0	4
NF1	17	29553662	ATT	A	Frameshift	NM_000267	c.2212_2213delTT					0	0.207303	0	1
NF1	17	29559087	TCAGAGA	T	SpliceSite	NM_000267	c.3198-3_3200delCAGAGA					0	0.374384	10	0
NF1	17	29661945	C	T	StopGain	NM_000267	c.5839C>T		p.R1947*			0	0.60412	0	1
NF1	17	29679366	C	T	StopGain	NM_000267	c.7486C>T		p.R2496*			0	0.60412	1	0
NF1	17	29685495	TAGGCA	T	SpliceSite	NM_000267	c.7908-2_7910delAGGCA					0	0.437039	0	1
NF1	17	29685604	G	T	StopGain	NM_000267	c.8014G>T		p.E2672*			0	0.625005	1	0
NIPBL	5	37010184	TAAAGG	T	SpliceSite	NM_133433	c.4422-4_4422delAAAGG					0	0.625005	3	4
NIPBL	5	37014783	A	T	SpliceSite	NM_133433	c.4561-2A>T					0	0.625005	1	0
NIPBL	5	37014784	G	T	SpliceSite	NM_133433	c.4561-1G>T					0	0.625005	1	0
NIPBL	5	37051876	TCCAG	T	Intronic	NM_133433	c.6955-4_6955-1delCCAG					0	0.625005	1	2
NLRP12	19	54301623	GA	G	Frameshift	NM_144687	c.2800delT	c.2798delT				1.8e-05	-0.0749841	1	0
NLRP12	19	54308640	T	A	StopGain	NM_144687	c.2308A>T		p.K770*			0	0.214265	0	1
NLRP12	19	54310803	A	AC	Frameshift	NM_144687	c.2188_2189insG	c.2182_2183insG				0.00017	0.0719478	1	1
NLRP12	19	54310828	G	A	StopGain	NM_144687	c.2164C>T		p.R722*			5.8e-05	0.235757	0	1
NLRP12	19	54313059	G	C	StopGain	NM_144687	c.1854C>G		p.Y618*			0.00026	0.175145	2	2
NLRP12	19	54313743	G	T	StopGain	NM_144687	c.1170C>A		p.Y390*			0	0.102878	0	1
NLRP12	19	54314007	AGAAGGCTTGAGCTCATC	A	Frameshift	NM_144687	c.889_905delGATGAGCTCAAGCCTTC	c.885_901delCTTCGATGAGCTCAAGC				0	0.576273	1	1
NLRP12	19	54314028	GCC	G	Frameshift	NM_144687	c.883_884delGG					5.4e-05	0.383876	3	1
NLRP12	19	54314075	G	A	StopGain	NM_144687	c.838C>T		p.Q280*			0.00033	-0.0544406	1	1
NLRP12	19	54314098	C	T	StopGain	NM_144687	c.815G>A		p.W272*			3.6e-05	0.494364	0	1
NLRP12	19	54314463	A	T	StopGain	NM_144687	c.450T>A		p.C150*			0	0.353499	1	0
NR3C2	4	149357811	GT	G	Frameshift	NM_000901	c.201delA	c.197delA				0	0.625005	1	0
NTRK3	15	88671957	CCGTGCTCTCTGC	C	SpliceSite	NM_002530	c.1205-4_1212delGCAGAGAGCACG	c.1205-3_1213delCAGAGAGCACGG				0	0.625005	0	0
NTRK3	15	88671959	GTGCTCTCTGC	G	SpliceSite	NM_002530	c.1205-4_1210delGCAGAGAGCA					0	0.625005	1	0
NUDT1	7	2284282	C	T	StopGain	NM_002452	c.73C>T		p.R25*			0.00094	0.221056	0	1
NUDT1	7	2289502	G	T	StopGain	NM_002452	c.163G>T		p.E55*			6.5e-05	0.429014	2	0
NUDT1	7	2289555	T	TT	StopGain	NM_002452	c.216_217insT	c.213_214insT	p.E73_V156del			0	0.569311	1	0
OPRM1	6	154360946	CC	C	Frameshift	NM_001008504	c.268delC	c.267delC				0	0.625005	0	1
OPRM1	6	154411169	C	T	StopGain	NM_001008504	c.499C>T		p.R167*			6e-05	0.502586	1	0
OPRM1	6	154411220	C	T	StopGain	NM_001008504	c.550C>T		p.R184*			0.00024	0.420688	1	2
OPRM1	6	154412370	AA	A	Frameshift	NM_001008504	c.928delA	c.927delA				0	0.625005	0	1
OPRM1	6	154412542	C	T	StopGain	NM_001008504	c.1099C>T		p.R367*			0	0.625005	1	0
OTOP1	4	4199228	C	A	StopGain	NM_177998	c.1333G>T		p.E445*			2.7e-05	0.559812	0	1
OTOP1	4	4199314	TCAGCA	T	StopGain	NM_177998	c.1242_1246delTGCTG	c.1239_1243delCTGTG	p.C414_I612del			0	0.409192	0	1
OTOP1	4	4199781	GCA	G	Frameshift	NM_177998	c.778_779delTG	c.776_777delTG				1.8e-05	0.565492	1	0
OTOP1	4	4204231	TGGTGCTTTGACTCATTGAGGACG	T	Frameshift	NM_177998	c.651_673delCGTCCTCAATGAGTCAAAGCACC					0	0.618043	1	0
OTOP1	4	4204256	CA	C	Frameshift	NM_177998	c.648delT					0	0.0402222	1	0
OTOP1	4	4204260	GGCCCACAGAAGCAGGT	G	Frameshift	NM_177998	c.629_644delACCTGCTTCTGTGGGC					0	0.618043	1	0
OTOP1	4	4204278	GGTGAACACCGAGTGGATCACTCCAAACCTGAAAAACACAAGGA	G	SpliceSite	NM_177998	c.600-16_626delTCCTTGTGTTTTTCAGGTTTGGAGTGATCCACTCGGTGTTCAC					0	0.618043	1	0
OTOP1	4	4214641	GT	G	Frameshift	NM_177998	c.493delA					0	0.0123754	0	1
OTOP1	4	4228209	GC	G	Frameshift	NM_177998	c.382delG					0.003	-0.246128	13	10
PAK6	15	40557002	AA	A	Frameshift	NM_020168	c.17delA	c.13delA				0	0.625005	0	1
PAK6	15	40558525	ACA	A	Frameshift	NM_020168	c.688_689delCA	c.686_687delCA				0	0.625005	1	0
PALB2	16	23619279	G	A	StopGain	NM_024675	c.3256C>T		p.R1086*			6.5e-05	0.24801	3	0
PALB2	16	23625324	C	G	SpliceSite	NM_024675	c.3201+1G>C					0	0.36046	1	0
PALB2	16	23625409	AT	A	Frameshift	NM_024675	c.3116delA	c.3115delA				2.7e-05	-0.0458563	1	0
PALB2	16	23634452	C	G	SpliceSite	NM_024675	c.2835-1G>C					0	0.242112	1	0
PALB2	16	23635329	C	T	SpliceSite	NM_024675	c.2834+1G>A					0	0.430077	1	0
PALB2	16	23637555	A	AA	Intronic	NM_024675	c.2748+1_2748+2insT	c.2748+2_2748+3insT				9e-06	0.256035	0	1
PALB2	16	23640993	ATG	A	Frameshift	NM_024675	c.2480_2481delCA	c.2477_2478delAC				0	-0.252169	1	0
PALB2	16	23641139	G	C	StopGain	NM_024675	c.2336C>G		p.S779*			6e-05	0.238041	0	1
PALB2	16	23641152	G	A	StopGain	NM_024675	c.2323C>T		p.Q775*			9e-06	0.367422	1	1
PALB2	16	23641246	AT	A	Frameshift	NM_024675	c.2228delA					0	0.437039	1	0
PALB2	16	23641306	CAT	C	Frameshift	NM_024675	c.2167_2168delAT					0.00036	-0.217722	1	0
PALB2	16	23641314	T	TC	Frameshift	NM_024675	c.2160_2161insG					0	-0.238246	1	0
PALB2	16	23641422	TG	T	Frameshift	NM_024675	c.2052delC	c.2050delC				1.8e-05	0.231331	1	0
PALB2	16	23641516	AC	A	Frameshift	NM_024675	c.1958delG					0	0.353499	1	0
PALB2	16	23641527	C	A	StopGain	NM_024675	c.1948G>T		p.E650*			0	0.36046	1	0
PALB2	16	23641751	C	T	StopGain	NM_024675	c.1724G>A		p.W575*			0	0.200341	1	0
PALB2	16	23646416	A	T	StopGain	NM_024675	c.1451T>A		p.L484*			0	0.179456	0	0
PALB2	16	23646574	ACT	A	Frameshift	NM_024675	c.1291_1292delAG	c.1289_1290delAG				0	0.0123754	0	2
PALB2	16	23646627	G	A	StopGain	NM_024675	c.1240C>T		p.R414*			3e-05	0.525547	4	1
PALB2	16	23646825	G	A	StopGain	NM_024675	c.1042C>T		p.Q348*			0	0.471848	1	0
PALB2	16	23646967	TG	T	Frameshift	NM_024675	c.899delC					0	-0.203437	1	0
PALB2	16	23647108	TAG	T	Frameshift	NM_024675	c.757_758delCT	c.755_756delCT				1.8e-05	-0.332567	1	0
PALB2	16	23647137	TGGTGAAATTA	T	Frameshift	NM_024675	c.720_729delTAATTTCACC	c.717_726delACCTAATTTC				0	-0.224322	1	0
PALB2	16	23647155	T	A	StopGain	NM_024675	c.712A>T		p.R238*			9e-06	0.23515	0	1
PALB2	16	23647265	C	CT	Frameshift	NM_024675	c.601_602insA	c.599_600insA				0	-0.168629	0	1
PALB2	16	23647356	ATC	A	Frameshift	NM_024675	c.509_510delGA	c.508_509delAG				7.2e-05	0.0778824	12	0
PALB2	16	23647395	G	A	StopGain	NM_024675	c.472C>T		p.Q158*			0	0.423116	1	0
PALB2	16	23647540	AG	A	Frameshift	NM_024675	c.326delC	c.324delC				0	0.158571	0	1
PALB2	16	23649186	G	A	StopGain	NM_024675	c.196C>T		p.Q66*			1.8e-05	0.293986	1	0
PALB2	16	23649206	GACAA	G	Frameshift	NM_024675	c.172_175delTTGT	c.168_171delTTGT				7.2e-05	0.168384	2	0
PALB2	16	23649253	C	CT	Frameshift	NM_024675	c.128_129insA	c.124_125insA				0	0.597158	0	1
PALB2	16	23649271	ACGCTA	A	SpliceSite	NM_024675	c.109-3_110delTAGCG	c.109-2_111delAGCGT				0	0.283882	1	0
PALB2	16	23652430	C	G	SpliceSite	NM_024675	c.48+1G>C					0	0.304767	1	0
PARP2	14	20815073	G	A	SpliceSite	NM_005484	c.363+1G>A					0	0.625005	1	0
PARP2	14	20820486	G	GG	Frameshift	NM_005484	c.619_620insG	c.617_618insG				0.0024	0.305148	0	0
PARP2	14	20823960	A	AA	Frameshift	NM_005484	c.991_992insA	c.985_986insA				0.00068	0.369098	1	1
PARP2	14	20824098	GAG	G	Frameshift	NM_005484	c.1049_1050delAG	c.1047_1048delAG				2.7e-05	0.580697	0	1
PARP2	14	20824159	G	GT	Frameshift	NM_005484	c.1109_1110insT			rs370394530	1.604e-05	3.6e-05	0.550057	1	1
PARP2	14	20825567	C	T	StopGain	NM_005484	c.1480C>T		p.Q494*	rs1128782	1.813e-05	3.6e-05	0.550057	1	0
PBXIP1	1	154918511	TACCA	T	Frameshift	NM_020524	c.1635_1638delTGGT					0	0.618043	1	0
PBXIP1	1	154918547	G	A	StopGain	NM_020524	c.1603C>T		p.R535*			9.9e-05	0.475641	0	2
PBXIP1	1	154918858	TCA	T	Frameshift	NM_020524	c.1290_1291delTG					0	0.618043	1	0
PBXIP1	1	154918925	G	A	StopGain	NM_020524	c.1225C>T		p.Q409*			0	0.618043	1	0
PBXIP1	1	154919203	G	GC	Frameshift	NM_020524	c.946_947insG	c.940_941insG				0	0.618043	1	0
PBXIP1	1	154920009	G	A	StopGain	NM_020524	c.754C>T		p.Q252*			3.7e-05	0.541424	2	1
PCBP4	3	51994287	ACT	A	Frameshift	NM_033010	c.303_304delAG					0	0.625005	0	1
PCK2	14	24566139	C	G	StopGain	NM_004563	c.68C>G		p.S23*			0.0038	-0.0808028	42	37
PCK2	14	24566204	C	T	StopGain	NM_004563	c.133C>T		p.R45*			8.9e-05	0.355607	1	0
PCK2	14	24566237	C	T	StopGain	NM_004563	c.166C>T		p.Q56*			0	0.52058	1	0
PCK2	14	24567446	C	T	StopGain	NM_004563	c.310C>T		p.R104*			6e-05	0.432969	0	2
PCK2	14	24567524	C	T	StopGain	NM_004563	c.388C>T		p.Q130*			9e-06	0.534503	1	0
PCK2	14	24567560	C	T	StopGain	NM_004563	c.424C>T		p.R142*			0.0002	0.319084	1	1
PCK2	14	24567597	G	A	SpliceSite	NM_004563	c.460+1G>A					2.7e-05	0.323114	0	1
PCK2	14	24567800	C	T	StopGain	NM_004563	c.577C>T		p.R193*			0.00013	0.397588	3	1
PCK2	14	24568300	T	TA	Frameshift	NM_004563	c.707_708insA					0.00077	-0.000344029	2	2
PCK2	14	24568330	TC	T	Frameshift	NM_004563	c.738delC					5.4e-05	0.161101	1	0
PCK2	14	24568929	GG	G	Intronic	NM_004563	c.1015+1delG	c.1015delG				9e-06	0.388307	0	1
PCK2	14	24569206	C	T	StopGain	NM_004563	c.1018C>T		p.R340*			9e-05	0.382986	1	1
PCK2	14	24569423	G	T	SpliceSite	NM_004563	c.1234+1G>T					0.0036	-0.317059	35	23
PCK2	14	24571994	C	T	StopGain	NM_004563	c.1267C>T		p.R423*			7.2e-05	0.439891	0	1
PCK2	14	24572367	A	T	SpliceSite	NM_004563	c.1373-2A>T					9.9e-05	0.197173	1	1
PCK2	14	24572377	CT	C	Frameshift	NM_004563	c.1382delT					5.8e-05	0.145255	1	0
PCK2	14	24572466	T	C	SpliceSite	NM_004563	c.1468+2T>C					0.0031	0.0251604	21	15
PCK2	14	24572718	G	A	SpliceSite	NM_004563	c.1469-1G>A					7.8e-05	0.207486	0	1
PDCD11	10	105162936	TGATTAGT	T	Frameshift	NM_014976	c.297_303delGATTAGT	c.295_301delGTGATTA				0	0.625005	1	0
PDCD11	10	105182780	CC	C	Frameshift	NM_014976	c.2534delC	c.2531delC				0	0.625005	1	0
PDCD11	10	105182886	A	AA	Frameshift	NM_014976	c.2639_2640insA	c.2638_2639insA				0	0.625005	0	1
PDCD11	10	105185263	C	T	StopGain	NM_014976	c.3286C>T		p.R1096*			6.5e-05	0.498631	0	1
PDCD11	10	105199549	C	T	StopGain	NM_014976	c.4072C>T		p.Q1358*			0	0.625005	0	1
PDS5B	13	33309308	G	A	SpliceSite	NM_015032	c.2248-1G>A					0	0.625005	0	1
PHAX	5	125936751	G	C	SpliceSite	NM_032177	c.96+1G>C			rs769774056	7.40034e-06	9.4e-06	0.625005	1	0
PHAX	5	125944086	CC	C	Frameshift	NM_032177	c.742delC	c.740delC				0	0.625005	0	1
PHAX	5	125944087	C	T	StopGain	NM_032177	c.742C>T		p.R248*			0	0.625005	1	0
PHF2	9	96411493	C	CTCAC	Frameshift	NM_005392	c.601_602insTCAC	c.600_601insCTCA				0	0.625005	1	0
PHRF1	11	608269	C	CC	Frameshift	NM_020901	c.2810_2811insC	c.2803_2804insC				9.9e-06	0.625005	0	1
PHRF1	11	608506	CGCGCTCTGGG	C	Frameshift	NM_020901	c.3048_3057delGCGCTCTGGG					0.0066	0.299081	1	0
PHRF1	11	609537	CC	C	Frameshift	NM_020901	c.4079delC	c.4076delC				0	0.625005	1	0
PHRF1	11	609701	CGCCGAGGACAGAGCCCCCCGTGAGTAGTGCCCCGGCCCCC	C	SpliceSite	NM_020901	c.4243_4261+21delGCCGAGGACAGAGCCCCCCGTGAGTAGTGCCCCGGCCCCC	c.4237_4261+15delGCCCCCGCCGAGGACAGAGCCCCCCGTGAGTAGTGCCCCG				0.00013	0.460244	0	1
PHRF1	11	609719	CCGTGAGTAGTGCCCCGGCCCCCACCGAGGACAGAGCCCCC	C	SpliceSite	NM_020901	c.4261_4261+39delCGTGAGTAGTGCCCCGGCCCCCACCGAGGACAGAGCCCCC	c.4244_4261+22delCCGAGGACAGAGCCCCCCGTGAGTAGTGCCCCGGCCCCCA				0	0.625005	1	1
PIK3CG	7	106508044	GAGAG	G	Frameshift	NM_001282426	c.39_42delAGAG	c.36_39delGAGA				9.4e-06	0.625005	1	0
PIK3CG	7	106508046	GAG	G	Frameshift	NM_001282426	c.41_42delAG	c.36_37delGA				0.00013	0.460244	1	0
PIK3CG	7	106508354	G	GG	Frameshift	NM_001282426	c.348_349insG	c.347_348insG				0	0.625005	1	0
PIK3CG	7	106508642	G	A	StopGain	NM_001282426	c.636G>A		p.W212*			0	0.625005	0	1
PIK3CG	7	106524599	G	A	SpliceSite	NM_001282426	c.2761-1G>A					0	0.625005	1	0
PIK3CG	7	106526645	AAAGA	A	Frameshift	NM_001282426	c.2939_2942delAAGA	c.2938_2941delAAAG				0	0.625005	0	1
PINX1	8	10683661	C	T	SpliceSite	NM_017884	c.394+1G>A					0	0.464886	1	0
PINX1	8	10692175	C	G	SpliceSite	NM_017884	c.129+1G>C					0	0.450963	0	1
PINX1	8	10692175	C	T	SpliceSite	NM_017884	c.129+1G>A					0.00013	0.293163	3	0
PINX1	8	10697247	C	A	SpliceSite	NM_017884	c.19+1G>T					0	0.123763	0	1
PLD2	17	4711322	TC	T	StopGain	NM_002663	c.154delC		p.L52_T933del			0	0.625005	0	1
PLD2	17	4711376	G	GCGAACACCAA	Frameshift	NM_002663	c.207_208insCGAACACCAA					0	0.625005	1	4
PLD2	17	4711710	C	T	StopGain	NM_002663	c.382C>T		p.R128*			6.3e-05	0.499488	2	0
PLD2	17	4713047	C	T	StopGain	NM_002663	c.676C>T		p.R226*			1.8e-05	0.614224	1	1
PLD2	17	4713079	G	T	SpliceSite	NM_002663	c.707+1G>T					0	0.625005	0	1
PLD2	17	4717774	G	T	StopGain	NM_002663	c.1072G>T		p.E358*			0.0016	0.318431	13	13
PLD2	17	4718769	A	T	SpliceSite	NM_002663	c.1174-2A>T					9e-06	0.625005	1	0
PLD2	17	4719144	GA	G	Frameshift	NM_002663	c.1371delA					0	0.625005	0	1
PLD2	17	4719185	C	T	StopGain	NM_002663	c.1411C>T		p.R471*			0.0002	0.430471	1	0
PLD2	17	4720479	C	A	StopGain	NM_002663	c.1740C>A		p.Y580*			0.00012	0.467878	0	1
PLD2	17	4721402	G	A	SpliceSite	NM_002663	c.1920+1G>A					1.8e-05	0.614224	1	0
PMS2	7	6022511	CT	C	Frameshift	NM_000535	c.2117delA	c.2116delA				0	0.618043	1	0
PMS2	7	6026815	CCT	C	Frameshift	NM_000535	c.1579_1580delAG					9e-06	-0.0433182	1	0
PMS2	7	6035245	G	A	StopGain	NM_000535	c.823C>T		p.Q275*			6e-05	0.258926	1	0
PMS2	7	6037050	TGC	T	Frameshift	NM_000535	c.708_709delGC					0	0.541465	13	26
PMS2	7	6043348	T	TC	Frameshift	NM_000535	c.325_326insG	c.319_320insG				9.8e-05	0.483265	0	1
POLR3A	10	79743771	C	T	SpliceSite	NM_007055	c.3337-1G>A					0	0.625005	1	0
POLR3A	10	79753125	G	A	StopGain	NM_007055	c.2617C>T		p.R873*			0.00012	0.467878	0	1
POLR3A	10	79753126	C	T	SpliceSite	NM_007055	c.2617-1G>A					4.5e-05	0.534189	2	1
POLR3A	10	79759773	G	GT	Frameshift	NM_007055	c.2581_2582insA	c.2580_2581insA				5.8e-05	0.507263	1	0
POLR3A	10	79760748	CA	C	Frameshift	NM_007055	c.2463delT	c.2460delT				0	0.625005	0	1
POLR3A	10	79767458	A	AA	Intronic	NM_007055	c.2074+1_2074+2insT	c.2074+2_2074+3insT				0	0.625005	1	0
POLR3A	10	79773495	GGGTGTACAGACACACT	G	Frameshift	NM_007055	c.1469_1484delAGTGTGTCTGTACACC					0	0.625005	0	1
POLR3A	10	79781302	A	AA	Intronic	NM_007055	c.1185+1_1185+2insT	c.1185+2_1185+3insT				0	0.625005	0	1
POLR3A	10	79781736	C	T	StopGain	NM_007055	c.930G>A		p.W310*			0	0.625005	0	1
POLR3A	10	79784399	CT	C	Frameshift	NM_007055	c.552delA	c.547delA				0	0.625005	0	1
POLR3A	10	79784450	T	A	StopGain	NM_007055	c.502A>T		p.K168*			0	0.625005	0	0
POLR3A	10	79784463	T	G	SpliceSite	NM_007055	c.491-2A>C					0	0.625005	0	1
POLR3A	10	79784892	GC	G	Frameshift	NM_007055	c.326delG					0	0.625005	1	0
POLR3A	10	79785875	AT	A	Frameshift	NM_007055	c.156delA					0	0.625005	0	1
POLR3A	10	79785877	AG	A	Frameshift	NM_007055	c.154delC					0	0.625005	0	1
PRMT9	4	148575186	AG	A	Frameshift	NM_138364	c.1861delC	c.1860delC				2.7e-05	0.580697	0	2
PRMT9	4	148582006	GT	G	Frameshift	NM_138364	c.1136delA	c.1135delA				0	0.625005	1	0
PRMT9	4	148582068	G	A	StopGain	NM_138364	c.1075C>T		p.R359*			6.5e-05	0.498631	1	1
PRMT9	4	148594835	CCAAA	C	Frameshift	NM_138364	c.525_528delTTTG	c.520_523delGTTT				0	0.625005	1	0
PRMT9	4	148601473	C	G	SpliceSite	NM_138364	c.338+1G>C					0	0.625005	0	1
PRMT9	4	148605136	C	T	Translation	NM_138364	c.3G>A		p.M1I			0	0.625005	1	1
PRRC2C	1	171496928	A	G	SpliceSite	NM_015172	c.1195-2A>G					0.00093	0.347317	6	3
PRRC2C	1	171526992	CAG	C	Frameshift	NM_015172	c.5736_5737delAG					0	0.625005	1	0
PRRC2C	1	171527010	CAGTCT	C	Frameshift	NM_015172	c.5754_5758delAGTCT					0	0.625005	2	0
PTCH1	9	98211473	G	A	StopGain	NM_000264	c.3682C>T		p.Q1228*			0	0.541465	1	0
PTCH1	9	98248157	C	T	SpliceSite	NM_000264	c.395-1G>A					9e-06	0.450963	1	0
PTEN	10	89720800	ACTTACTTT	A	Frameshift	NM_000314	c.952_959delCTTACTTT					0	0.569311	2	1
PTK2B	8	27297897	CGCTGCTGGGACTACGACCC	C	Frameshift	NM_173174	c.1979_1997delGCTGCTGGGACTACGACCC	c.1974_1992delGACCCGCTGCTGGGACTAC				0	0.597158	1	0
PTK2B	8	27308413	G	T	SpliceSite	NM_173174	c.2487+1G>T					2.7e-05	0.55285	1	0
PTK2B	8	27311783	CC	C	Frameshift	NM_173174	c.2709delC	c.2704delC				0	0.597158	1	1
PTPRN	2	220155259	C	T	SpliceSite	NM_002846	c.2868+1G>A					0	0.625005	1	0
PTPRN	2	220159816	C	CCGCACCAGAAAGTCCT	Frameshift	NM_002846	c.2555_2556insAGGACTTTCTGGTGCG	c.2530_2531insTCTGGTGCGAGGACTT				1.8e-05	0.614224	1	0
PTPRN	2	220162143	G	A	StopGain	NM_002846	c.1900C>T		p.Q634*			0	0.625005	0	0
PTPRN	2	220162157	T	C	SpliceSite	NM_002846	c.1888-2A>G					0	0.625005	1	0
PTPRN	2	220163834	C	T	SpliceSite	NM_002846	c.1604-1G>A					9e-06	0.625005	0	1
PYROXD1	12	21590666	T	C	Translation	NM_024854	c.2T>C		p.M1T			0	0.374384	0	1
PYROXD1	12	21598401	G	A	SpliceSite	NM_024854	c.285+1G>A					0.00016	0.249297	1	4
PYROXD1	12	21608226	GGT	G	Intronic	NM_024854	c.649+1_649+2delGT					1e-05	0.618043	0	1
RAD1	5	34911816	G	A	StopGain	NM_002853	c.409C>T		p.Q137*			3.6e-05	0.494364	0	2
RAD1	5	34911867	TC	T	Frameshift	NM_002853	c.357delG					3.6e-05	0.487402	2	3
RAD1	5	34911900	G	A	StopGain	NM_002853	c.325C>T		p.R109*			0.0013	0.204193	3	2
RAD1	5	34914825	CACTTT	C	Frameshift	NM_002853	c.168_172delAAAGT					0.00053	0.363984	10	5
RAD50	5	131893019	G	A	Translation	NM_005732	c.3G>A		p.M1I			0.00011	0.475095	3	1
RAD50	5	131911580	ACAGA	A	Frameshift	NM_005732	c.326_329delCAGA	c.323_326delAGAC				7.2e-05	0.495584	1	0
RAD50	5	131911608	TT	T	Frameshift	NM_005732	c.354delT	c.353delT				2.7e-05	0.580697	2	2
RAD50	5	131915116	ATC	A	Frameshift	NM_005732	c.474_475delTC					0	0.625005	0	1
RAD50	5	131924514	TT	T	Frameshift	NM_005732	c.1188delT	c.1185delT				0	0.625005	0	1
RAD50	5	131925406	T	TAAGTT	Frameshift	NM_005732	c.1329_1330insAAGTT	c.1327_1328insTTAAG				0	0.625005	1	0
RAD50	5	131925419	G	T	StopGain	NM_005732	c.1342G>T		p.E448*			0	0.625005	0	1
RAD50	5	131930560	G	T	SpliceSite	NM_005732	c.1794-1G>T					1.8e-05	0.614224	1	0
RAD50	5	131930601	AATAA	A	Frameshift	NM_005732	c.1835_1838delATAA	c.1831_1834delATAA				0	0.625005	0	1
RAD50	5	131931460	A	AA	Frameshift	NM_005732	c.2165_2166insA	c.2156_2157insA				0	0.625005	0	1
RAD50	5	131939040	CAAAC	C	Frameshift	NM_005732	c.2257_2260delAAAC	c.2253_2256delAAAC				0	0.625005	0	1
RAD50	5	131939648	C	T	StopGain	NM_005732	c.2434C>T		p.Q812*			0	0.625005	1	0
RAD51C	17	56772370	A	AA	StopGain	NM_058216	c.224_225insA	c.223_224insA	p.Y75_L376del			2.7e-05	0.316152	1	0
RAD51C	17	56772407	ACT	A	Frameshift	NM_058216	c.262_263delCT					0	0.332614	1	0
RAD51C	17	56772458	TT	T	Frameshift	NM_058216	c.313delT	c.312delT				0	0.618043	1	0
RAD51C	17	56774058	C	T	StopGain	NM_058216	c.409C>T		p.Q137*			0	0.56235	1	0
RAD51C	17	56774151	A	T	StopGain	NM_058216	c.502A>T		p.R168*			9e-06	0.513618	1	0
RAD51C	17	56787218	A	G	SpliceSite	NM_058216	c.706-2A>G					4.5e-05	0.262683	1	0
RAD51C	17	56787245	TT	T	Frameshift	NM_058216	c.732delT	c.731delT				0	0.367422	0	1
RAD51C	17	56787334	AA	A	Frameshift	NM_058216	c.821delA	c.819delA				9e-06	-0.071165	0	1
RAD51C	17	56801398	CAG	C	Intronic	NM_058216	c.905-2_905-1delAG					5.8e-05	0.277527	0	1
RAD51D	17	33428224	CG	C	Frameshift	NM_002878	c.898delC	c.896delC				0	0.56235	1	0
RAD51D	17	33428225	G	A	StopGain	NM_002878	c.898C>T		p.R300*			0.00017	0.378263	1	0
RAD51D	17	33430317	G	A	StopGain	NM_002878	c.694C>T		p.R232*			3.7e-05	0.48573	1	0
RAD51D	17	33433425	G	A	StopGain	NM_002878	c.556C>T		p.R186*			2.7e-05	0.525003	0	1
RAD51D	17	33434009	G	A	StopGain	NM_002878	c.478C>T		p.Q160*			0	0.60412	1	0
RAD51D	17	33434036	G	A	StopGain	NM_002878	c.451C>T		p.Q151*			9e-06	0.569311	2	1
RAD51D	17	33446133	G	C	StopGain	NM_002878	c.141C>G		p.Y47*			0	0.471848	0	1
RAD51D	17	33446631	A	C	Translation	NM_002878	c.2T>G		p.M1R			0	0.332614	1	0
RASA2	3	141248642	C	T	StopGain	NM_006506	c.448C>T		p.Q150*			0	0.60412	0	0
RASA2	3	141278810	T	A	StopGain	NM_006506	c.836T>A		p.L279*			0	0.60412	1	0
RASA2	3	141289818	C	T	StopGain	NM_006506	c.928C>T		p.R310*			5.8e-05	0.458531	0	1
RASA2	3	141295934	C	T	StopGain	NM_006506	c.1576C>T		p.R526*			3.3e-05	0.547988	0	1
RASA2	3	141305546	C	T	StopGain	NM_006506	c.1885C>T		p.R629*			0	0.60412	0	1
RASA2	3	141327427	C	T	StopGain	NM_006506	c.2113C>T		p.R705*			1.8e-05	0.586377	1	0
RASA2	3	141327489	CT	C	Frameshift	NM_006506	c.2176delT					0	0.583235	1	0
RASA2	3	141328760	G	T	StopGain	NM_006506	c.2371G>T		p.E791*			0	0.618043	0	1
RASEF	9	85613279	C	T	SpliceSite	NM_152573	c.1805+1G>A					0	0.625005	0	1
RASEF	9	85615415	TGGGGCTTCCAGTCTAA	T	Frameshift	NM_152573	c.1492_1507delTTAGACTGGAAGCCCC	c.1491_1506delCTTAGACTGGAAGCCC				9e-06	0.625005	1	1
RASEF	9	85615810	C	A	SpliceSite	NM_152573	c.1437+1G>T					0	0.625005	0	0
RASEF	9	85620346	C	CT	Frameshift	NM_152573	c.1097_1098insA	c.1095_1096insA				0.00033	0.411993	0	1
RASEF	9	85620393	CAT	C	Frameshift	NM_152573	c.1049_1050delAT					6.3e-05	0.499488	3	1
RASEF	9	85624629	TTGTC	T	StopGain	NM_152573	c.882_885delGACA	c.879_882delACAG	p.T295_G740delinsT			0	0.625005	1	0
RASEF	9	85630815	C	A	StopGain	NM_152573	c.670G>T		p.E224*			0	0.625005	1	0
RASEF	9	85630816	C	A	SpliceSite	NM_152573	c.670-1G>T					0	0.625005	1	1
RASEF	9	85630817	T	A	SpliceSite	NM_152573	c.670-2A>T					0	0.625005	1	1
RASEF	9	85637281	AATCCTCTG	A	Frameshift	NM_152573	c.631_638delCAGAGGAT	c.627_634delGGATCAGA				0	0.625005	1	0
RASEF	9	85640689	C	T	SpliceSite	NM_152573	c.578+1G>A					9e-06	0.625005	1	0
RASEF	9	85677781	A	G	Translation	NM_152573	c.2T>C		p.M1T			0	0.625005	0	2
RECQL	12	21624384	AGT	A	Frameshift	NM_002907	c.1643_1644delAC	c.1640_1641delCA				0	0.0819924	1	0
RECQL	12	21624447	TCA	T	Frameshift	NM_002907	c.1580_1581delTG					0	0.36046	0	1
RECQL	12	21627769	GCTTA	G	Intronic	NM_002907	c.1355+2_1355+5delTAAG	c.1354_1355+2delAAGT				9e-06	0.471848	0	1
RECQL	12	21627774	C	T	SpliceSite	NM_002907	c.1355+1G>A					6.3e-05	0.339369	1	0
RECQL	12	21627911	G	A	StopGain	NM_002907	c.1219C>T		p.R407*			3.3e-05	0.513179	2	1
RECQL	12	21628480	T	A	StopGain	NM_002907	c.1138A>T		p.K380*			6.3e-05	0.499488	1	0
RECQL	12	21628609	C	T	SpliceSite	NM_002907	c.1098+1G>A					2.7e-05	0.378807	1	0
RECQL	12	21629928	T	C	SpliceSite	NM_002907	c.868-2A>G					0.0056	-0.180311	0	1
RECQL	12	21630736	C	T	SpliceSite	NM_002907	c.867+1G>A					0	0.464886	0	1
RECQL	12	21636367	G	A	StopGain	NM_002907	c.643C>T		p.R215*			3.4e-05	0.511569	0	1
RECQL	12	21639487	GA	G	Frameshift	NM_002907	c.426delT					7.4e-05	0.209271	1	0
RECQL	12	21639518	ACCT	A	SpliceSite	NM_002907	c.395-2_395delAGG					0	0.430077	2	2
RECQL	12	21644531	TTTTC	T	StopGain	NM_002907	c.132_135delGAAA	c.129_132delAAAG	p.K44_A649delinsK			7.2e-05	0.419006	1	1
RECQL	12	21652503	A	G	Translation	NM_002907	c.2T>C		p.M1T			0.0051	-0.0197117	2	0
RGS22	8	100977605	T	TAA	Frameshift	NM_015668	c.3572_3573insTT	c.3569_3570insTT				1.8e-05	0.328794	1	0
RGS22	8	100977618	AT	A	Frameshift	NM_015668	c.3559delA					0	-0.286978	1	0
RGS22	8	100994346	T	C	SpliceSite	NM_015668	c.3181-2A>G					9.2e-06	0.207303	0	1
RGS22	8	100999703	CT	C	Frameshift	NM_015668	c.3162delA	c.3161delA				0	0.625005	0	1
RGS22	8	101014534	G	A	StopGain	NM_015668	c.2686C>T		p.R896*			5.4e-05	0.453493	1	0
RGS22	8	101018316	G	A	StopGain	NM_015668	c.2383C>T		p.R795*			0	0.527541	0	1
RGS22	8	101020780	G	GT	StopGain	NM_015668	c.2183_2184insA	c.2182_2183insA	p.Y728_K1264del			3.6e-05	0.382977	0	1
RGS22	8	101051158	C	CT	Frameshift	NM_015668	c.2166_2166+1insA	c.2164_2165insA				0	0.430077	0	1
RGS22	8	101054029	C	T	SpliceSite	NM_015668	c.1938+1G>A					0	0.200341	1	0
RGS22	8	101059818	CTTCT	C	Frameshift	NM_015668	c.1692_1695delAGAA	c.1690-2_1691delAGAA				0	0.576273	0	1
RGS22	8	101075704	C	T	StopGain	NM_015668	c.1292G>A		p.W431*			0	0.56235	0	0
RGS22	8	101076033	G	GTA	Frameshift	NM_015668	c.962_963insTA	c.954_955insTA				3e-05	0.29581	1	1
RGS22	8	101078526	T	C	SpliceSite	NM_015668	c.595-2A>G					0	0.36046	1	0
RGS22	8	101083647	CA	C	Frameshift	NM_015668	c.543delT					0	0.60412	0	1
RGS22	8	101084426	G	GA	Frameshift	NM_015668	c.371_372insT	c.370_371insT				0	0.60412	0	1
RGS22	8	101084429	C	CA	Frameshift	NM_015668	c.368_369insT					0	0.618043	0	1
RIC1	9	5656611	A	AAG	Frameshift	NM_020829	c.173_174insAG					5.4e-05	0.516148	4	2
RIC1	9	5656613	CCTGCAAAATCA	C	Frameshift	NM_020829	c.176_186delCTGCAAAATCA					4.5e-05	0.534189	4	2
RIC1	9	5720299	TT	T	Frameshift	NM_020829	c.559delT	c.556delT				0	0.625005	0	1
RIC1	9	5753529	TAAACAG	T	Intronic	NM_020829	c.1492-6_1492-1delAAACAG					0	0.625005	2	7
RIC1	9	5773061	C	T	StopGain	NM_020829	c.3964C>T		p.R1322*			9.2e-06	0.625005	1	0
RINT1	7	105190934	G	A	SpliceSite	NM_021930	c.1333+1G>A					0.00011	0.475095	3	6
RINT1	7	105195588	AG	A	Frameshift	NM_021930	c.1586delG					9e-06	0.625005	1	0
RINT1	7	105195606	C	T	StopGain	NM_021930	c.1603C>T		p.R535*			3.2e-05	0.557578	1	0
RNF175	4	154631642	C	G	SpliceSite	NM_173662	c.867-1G>C			rs747579203	3.31074e-05	0	0.123763	1	0
RNF175	4	154633625	A	G	SpliceSite	NM_173662	c.866+2T>C					0	0.249073	0	1
RNF175	4	154633680	CT	C	Frameshift	NM_173662	c.812delA			rs1401383625	4.02379e-06	0	0.618043	0	1
RNF175	4	154633709	G	A	StopGain	NM_173662	c.784C>T		p.R262*	rs755603150	8.07239e-06	1.8e-05	0.593339	1	0
RNF175	4	154633724	GA	G	Frameshift	NM_173662	c.768delT	c.766delT		rs748534464	0.000889577	0.00063	0.199011	16	9
RNF175	4	154633729	C	G	SpliceSite	NM_173662	c.765-1G>C			rs201624616	0.000892251	0.00063	0.178126	16	9
RNF175	4	154641418	GAC	G	Frameshift	NM_173662	c.546_547delGT	c.543_544delTG				0	0.0541456	0	0
RNF175	4	154649360	G	A	StopGain	NM_173662	c.400C>T		p.R134*	rs202058615	0.000329395	0.0043	0.162057	1	0
RNF175	4	154669796	C	T	SpliceSite	NM_173662	c.246+1G>A			rs1335296421	4.671e-06	0	0.0471839	2	0
RNF181	2	85822905	G	T	StopGain	NM_016494	c.19G>T		p.E7*			1.8e-05	0.614224	0	2
RNF181	2	85824292	ACGAGA	A	StopGain	NM_016494	c.394_398delCGAGA	c.391_395delAGACG	p.R132_T153del			0.00011	0.3289	4	2
RNF181	2	85824567	G	A	SpliceSite	NM_016494	c.403-1G>A					0	0.311729	1	0
SCN7A	2	167266774	T	A	StopGain	NM_002976	c.3667A>T		p.K1223*			0	0.60412	0	1
SCN7A	2	167273224	AG	A	Frameshift	NM_002976	c.3406delC					0	0.56235	0	1
SCN7A	2	167273275	TCCCA	T	Frameshift	NM_002976	c.3352_3355delTGGG					0	0.618043	2	0
SCN7A	2	167273497	T	A	SpliceSite	NM_002976	c.3136-2A>T					0	0.214265	1	0
SCN7A	2	167285785	C	T	SpliceSite	NM_002976	c.2593-1G>A					0	0.381346	0	1
SCN7A	2	167288951	GC	G	Frameshift	NM_002976	c.2468delG					0	0.36046	1	0
SCN7A	2	167289162	GC	G	Frameshift	NM_002976	c.2257delG	c.2256delG				9.1e-06	-0.00154796	2	0
SCN7A	2	167297952	C	T	StopGain	NM_002976	c.2111G>A		p.W704*			9.1e-06	0.353499	1	0
SCN7A	2	167298076	CTT	C	Frameshift	NM_002976	c.1985_1986delAA	c.1984_1985delAA				0	0.172495	1	0
SCN7A	2	167298233	C	T	StopGain	NM_002976	c.1830G>A		p.W610*			8.4e-05	0.469308	2	1
SCN7A	2	167301356	G	T	StopGain	NM_002976	c.1542C>A		p.C514*			0	0.576273	1	0
SCN7A	2	167318897	A	G	SpliceSite	NM_002976	c.1083+2T>C					0	0.290843	0	1
SCN7A	2	167318928	G	A	StopGain	NM_002976	c.1054C>T		p.Q352*			0	0.597158	1	0
SEC23B	20	18492868	GTCAG	G	Frameshift	NM_032985	c.222_225delTCAG	c.222-3_222delCAGT				6.6e-05	0.4982	1	0
SEC23B	20	18505624	C	T	StopGain	NM_032985	c.649C>T		p.R217*			0.00034	0.410991	1	1
SEC23B	20	18505665	G	A	SpliceSite	NM_032985	c.689+1G>A					4.5e-05	0.534189	0	0
SEC23B	20	18507152	C	T	StopGain	NM_032985	c.970C>T		p.R324*			6.3e-05	0.499488	0	1
SEC23B	20	18516387	G	A	SpliceSite	NM_032985	c.1404+1G>A					0	0.625005	0	0
SEC23B	20	18522958	C	CC	Frameshift	NM_032985	c.1423_1424insC	c.1418_1419insC				0	0.625005	1	0
SEC23B	20	18523799	C	T	StopGain	NM_032985	c.1648C>T		p.R550*			0.00015	0.44745	2	0
SEC23B	20	18523811	C	T	StopGain	NM_032985	c.1660C>T		p.R554*			6e-05	0.502586	0	1
SEC23B	20	18526644	T	TT	StopGain	NM_032985	c.1710_1711insT	c.1706_1707insT	p.R571_C767del			1.8e-05	0.614224	1	1
SEC23B	20	18531735	AG	A	Frameshift	NM_032985	c.1909delG					9e-06	0.625005	0	1
SEC23B	20	18531769	AGA	A	Frameshift	NM_032985	c.1943_1944delGA	c.1942_1943delAG				0	0.625005	1	0
SEC23B	20	18535783	CTC	C	Frameshift	NM_032985	c.2181_2182delTC	c.2179_2180delTC				0	0.625005	0	1
SERPINF1	17	1670280	CC	C	Frameshift	NM_002615	c.77delC	c.72delC				3.4e-05	-0.101061	0	1
SERPINF1	17	1675258	C	T	StopGain	NM_002615	c.532C>T		p.Q178*			0	0.534503	1	0
SERPINF1	17	1679946	C	T	StopGain	NM_002615	c.907C>T		p.R303*			5.8e-05	0.381952	0	1
SGSM3	22	40796818	G	A	SpliceSite	NM_015705	c.7+1G>A					0	0.618043	0	0
SGSM3	22	40798206	G	GTACAAGG	Frameshift	NM_015705	c.154_155insTACAAGG	c.146_147insGTACAAG				0	0.618043	1	0
SGSM3	22	40802610	CTC	C	Frameshift	NM_015705	c.1130_1131delTC	c.1128_1129delTC				0	0.618043	1	0
SGSM3	22	40803498	C	T	StopGain	NM_015705	c.1450C>T		p.R484*			5.8e-05	0.500301	1	0
SGSM3	22	40804317	G	GG	Frameshift	NM_015705	c.1666_1667insG	c.1661_1662insG				3.2e-05	0.550616	1	0
SGSM3	22	40804847	G	T	SpliceSite	NM_015705	c.1902+1G>T					0	0.618043	1	0
SGSM3	22	40805321	C	T	StopGain	NM_015705	c.2056C>T		p.Q686*			9e-06	0.618043	0	1
SH2D6	2	85661235	G	A	SpliceSite	NM_201594	c.41+1G>A					9.6e-05	-0.406526	1	0
SH2D6	2	85661595	G	C	SpliceSite	NM_201594	c.73-1G>C					5.9e-05	-0.351344	0	1
SIRT3	11	218831	C	T	SpliceSite	NM_001017524	c.753+1G>A					3.6e-05	-0.229653	1	0
SIRT3	11	218993	G	A	StopGain	NM_001017524	c.592C>T		p.R198*			0.00024	0.413726	0	1
SIRT3	11	224098	TG	T	Frameshift	NM_001017524	c.522delC					0	0.27692	1	0
SIRT3	11	233377	CG	C	Frameshift	NM_001017524	c.12delC	c.11delC				0.00087	0.185801	5	16
SLC10A6	4	87749299	A	AC	Frameshift	NM_197965	c.607_608insG	c.603_604insG				0	-0.13382	1	0
SLC10A6	4	87749323	T	G	SpliceSite	NM_197965	c.586-2A>C					0	-0.0293948	0	2
SLC10A6	4	87770252	GA	G	Frameshift	NM_197965	c.16delT	c.15delT				0	0.478809	1	0
SLC10A6	4	87770266	C	T	Translation	NM_197965	c.3G>A		p.M1I			0	0.123763	1	0
SLC22A10	11	63059011	G	C	SpliceSite	NM_001039752	c.403-1G>C			rs200029760	8.22898e-05	9e-05	0.0627482	1	0
SLC22A10	11	63064782	C	T	StopGain	NM_001039752	c.514C>T		p.R172*	rs111381363	0.000819232	0.0069	0.0899385	2	1
SLC22A10	11	63064892	TT	T	Frameshift	NM_001039752	c.625delT	c.621delT				1.8e-05	-0.0610607	1	0
SLC22A10	11	63065040	G	A	StopGain	NM_001039752	c.671G>A		p.W224*			0	0.56235	1	0
SLC22A10	11	63065114	G	T	StopGain	NM_001039752	c.745G>T		p.G249*			0	0.402231	1	1
SLC22A10	11	63065135	C	T	StopGain	NM_001039752	c.766C>T		p.R256*	rs200993042	7.62679e-05	0.0002	0.131118	1	2
SLC22A10	11	63065188	TC	T	Frameshift	NM_001039752	c.820delC			rs762447604	8.0601e-06	3e-05	0.0939211	1	2
SLC22A10	11	63066394	G	A	StopGain	NM_001039752	c.833G>A		p.W278*	rs370381688	1.60479e-05	3.6e-05	0.473479	1	1
SLC22A10	11	63067102	G	T	SpliceSite	NM_001039752	c.1070+1G>T					0	-0.13382	1	0
SLC22A10	11	63069894	C	CTT	Frameshift	NM_001039752	c.1164_1165insTT			rs199596564	4.01175e-06	9e-06	0.0541456	0	0
SLC22A10	11	63069898	CT	C	Frameshift	NM_001039752	c.1169delT			rs1202115302	4.01184e-06	9e-06	-0.0154714	0	0
SLC22A13	3	38307450	C	CC	Frameshift	NM_004256	c.99_100insC	c.96_97insC				0.00063	-0.0724949	5	4
SLC22A13	3	38307637	C	T	StopGain	NM_004256	c.286C>T		p.Q96*			4.5e-05	0.492419	1	0
SLC22A13	3	38307727	G	T	StopGain	NM_004256	c.376G>T		p.E126*			6.6e-05	0.491238	1	0
SLC22A13	3	38316530	C	T	StopGain	NM_004256	c.688C>T		p.Q230*			2.7e-05	0.343999	1	0
SLC22A13	3	38316577	C	A	StopGain	NM_004256	c.735C>A		p.Y245*			2.7e-05	-0.226861	1	1
SLC22A13	3	38316594	GG	G	Frameshift	NM_004256	c.753delG	c.752delG				0	0.325652	0	1
SLC22A13	3	38317588	G	T	SpliceSite	NM_004256	c.1237+1G>T					1.8e-05	0.307909	1	0
SLC22A13	3	38317776	A	G	SpliceSite	NM_004256	c.1238-2A>G					7.3e-05	0.0078244	0	1
SLC22A13	3	38317887	G	A	SpliceSite	NM_004256	c.1346+1G>A					0	0.0262988	0	1
SLC22A13	3	38318486	A	AA	Frameshift	NM_004256	c.1430_1431insA	c.1429_1430insA				0.00012	-0.22133	0	3
SLC22A13	3	38318549	T	TT	Frameshift	NM_004256	c.1493_1494insT	c.1492_1493insT				0	0.19338	0	1
SLC22A5	5	131714133	GTG	G	Frameshift	NM_003060	c.458_459delTG	c.455_456delGT				2.7e-05	0.364884	1	1
SLC22A5	5	131719994	G	A	SpliceSite	NM_003060	c.652+1G>A					2.7e-05	0.413616	1	0
SLC22A5	5	131722716	G	C	SpliceSite	NM_003060	c.825-1G>C					0	0.36046	0	1
SLC22A5	5	131722736	C	T	StopGain	NM_003060	c.844C>T		p.R282*			0.00026	0.272609	4	2
SLC22A5	5	131724618	AG	A	Frameshift	NM_003060	c.958delG					0	0.221226	1	0
SLC22A5	5	131724667	C	T	StopGain	NM_003060	c.1006C>T		p.R336*			3e-05	0.323657	1	0
SLC2A8	9	130162223	GG	G	Frameshift	NM_014580	c.465delG	c.461delG				0.00031	0.246895	4	3
SLC2A8	9	130162224	G	GG	Frameshift	NM_014580	c.465_466insG	c.460_461insG				0	0.597158	1	0
SLC2A8	9	130162257	CGTCGG	C	Frameshift	NM_014580	c.499_503delGTCGG					0.00035	0.28467	1	0
SLC2A8	9	130166017	C	T	StopGain	NM_014580	c.802C>T		p.Q268*			0.0016	0.262737	10	9
SLC2A8	9	130166295	GC	G	Frameshift	NM_014580	c.926delC					0.00016	0.235373	5	4
SLC4A7	3	27444629	C	T	SpliceSite	NM_003615	c.2294+1G>A					0	0.625005	0	1
SLC4A7	3	27475596	C	A	SpliceSite	NM_003615	c.563-1G>T					0	0.625005	0	2
SLC4A7	3	27475597	T	A	SpliceSite	NM_003615	c.563-2A>T					0	0.625005	0	3
SLC4A8	12	51890909	G	T	SpliceSite	NM_001039960	c.3081+1G>T					0	0.625005	0	1
SLC4A9	5	139740954	T	A	SpliceSite	NM_031467	c.505+2T>A					0	0.381346	0	1
SLC4A9	5	139741436	CC	C	StopGain	NM_031467	c.550delC	c.545delC	p.L184_N959del			6.3e-05	-0.154911	0	1
SLC4A9	5	139741630	C	CAGAACCCCCTGAGACAGAAGCTACC	Frameshift	NM_031467	c.590_591insAGAACCCCCTGAGACAGAAGCTACC	c.564_565insCAGAACCCCCTGAGACAGAAGCTAC				1.8e-05	0.196522	1	0
SLC4A9	5	139741735	TTACT	T	Frameshift	NM_031467	c.696_699delTACT	c.694_697delCTTA				0	0.625005	1	0
SLC4A9	5	139742546	CA	C	Frameshift	NM_031467	c.858delA					9e-06	0.269958	2	1
SLC4A9	5	139743311	A	C	SpliceSite	NM_031467	c.1080-2A>C					0	0.332614	0	1
SLC4A9	5	139743456	G	GG	Frameshift	NM_031467	c.1223_1224insG	c.1218_1219insG				3.6e-05	0.410823	2	0
SLC4A9	5	139744068	TGAGGAAGGTTTCTGTGCCCT	T	Frameshift	NM_031467	c.1510_1529delGAGGAAGGTTTCTGTGCCCT	c.1508_1527delCTGAGGAAGGTTTCTGTGCC				0	0.625005	1	0
SLC4A9	5	139745417	A	G	SpliceSite	NM_031467	c.1711-2A>G					0.00012	-0.130828	0	1
SLC4A9	5	139745427	CC	C	StopGain	NM_031467	c.1720delC	c.1719delC	p.L574_N959del			6.3e-05	0.116595	0	1
SLC4A9	5	139745850	G	A	SpliceSite	NM_031467	c.2013+1G>A					0	0.457924	1	0
SLC4A9	5	139747064	G	A	StopGain	NM_031467	c.2073G>A		p.W691*			0.00086	0.2424	2	5
SLC4A9	5	139751035	G	C	SpliceSite	NM_031467	c.2497-1G>C					9e-06	0.242112	2	0
SLC4A9	5	139751174	A	T	StopGain	NM_031467	c.2635A>T		p.K879*			0	0.625005	1	0
SLC4A9	5	139751984	T	C	SpliceSite	NM_031467	c.2826+2T>C					0	0.221226	1	0
SLC4A9	5	139752345	C	T	StopGain	NM_031467	c.2842C>T		p.Q948*			0	0.506656	0	1
SLX4	16	3633356	TG	T	Frameshift	NM_032444	c.4894delC	c.4892delC				0	0.625005	0	1
SLX4	16	3633428	G	C	StopGain	NM_032444	c.4823C>G		p.S1608*			0	0.625005	1	0
SLX4	16	3634768	A	G	SpliceSite	NM_032444	c.4739+2T>C					5.8e-05	0.507263	1	0
SLX4	16	3639030	G	A	StopGain	NM_032444	c.4609C>T		p.Q1537*			0	0.625005	0	1
SLX4	16	3639247	GCTGTCGGCGGC	G	Frameshift	NM_032444	c.4381_4391delGCCGCCGACAG	c.4379_4389delAGGCCGCCGAC				9.1e-06	0.625005	1	0
SLX4	16	3639614	CT	C	Frameshift	NM_032444	c.4024delA	c.4023delA				0	0.625005	1	0
SLX4	16	3639952	CA	C	Frameshift	NM_032444	c.3686delT	c.3684delT				9e-06	0.625005	0	2
SLX4	16	3640834	G	GCAGGA	Frameshift	NM_032444	c.2804_2805insTCCTG					0	0.625005	0	1
SLX4	16	3641097	C	A	StopGain	NM_032444	c.2542G>T		p.E848*			0	0.625005	0	1
SLX4	16	3641255	G	C	StopGain	NM_032444	c.2384C>G		p.S795*			0	0.625005	1	0
SLX4	16	3646395	C	T	SpliceSite	NM_032444	c.1684-1G>A					0	0.625005	1	0
SLX4	16	3647656	T	TG	Frameshift	NM_032444	c.1406_1407insC	c.1399_1400insC				0	0.625005	1	0
SLX4	16	3652141	G	A	StopGain	NM_032444	c.928C>T		p.R310*			0	0.625005	1	0
SLX4	16	3658760	TC	T	Frameshift	NM_032444	c.205delG	c.204delG				0	0.625005	0	1
SMARCA2	9	2029221	C	T	StopGain	NM_003070	c.199C>T		p.Q67*			0	0.625005	1	0
SMARCA2	9	2170417	A	G	SpliceSite	NM_003070	c.4200-2A>G			rs1233949889	3.97817e-06	9e-06	0.625005	1	0
SMARCA2	9	2191409	G	A	SpliceSite	NM_003070	c.4737+1G>A					0	0.625005	1	0
SMARCA2	9	2192703	G	A	SpliceSite	NM_003070	c.4738-1G>A			rs779583076	7.95539e-06	3e-05	0.567317	0	1
SMARCAL1	2	217279841	CTT	C	Frameshift	NM_014140	c.415_416delTT					3.6e-05	0.550057	1	1
SMARCAL1	2	217285020	A	G	SpliceSite	NM_014140	c.863-2A>G					3.6e-05	0.550057	2	0
SMARCAL1	2	217285159	C	T	StopGain	NM_014140	c.1000C>T		p.R334*			0	0.625005	1	0
SMARCAL1	2	217297592	G	A	SpliceSite	NM_014140	c.1485+1G>A					9e-06	0.625005	1	0
SMARCAL1	2	217300175	A	T	StopGain	NM_014140	c.1600A>T		p.K534*			0	0.625005	0	1
SMARCAL1	2	217315650	CGC	C	Frameshift	NM_014140	c.1934_1935delGC	c.1932_1933delGC				0	0.625005	2	0
SMARCAL1	2	217329326	C	T	StopGain	NM_014140	c.2077C>T		p.Q693*			0	0.625005	1	0
SMARCAL1	2	217342939	G	T	StopGain	NM_014140	c.2542G>T		p.E848*			0.00012	0.467878	3	5
SPATA21	1	16727260	G	A	StopGain	NM_198546	c.1129C>T		p.R377*			0.00012	0.440031	1	1
SPATA21	1	16727274	G	C	StopGain	NM_198546	c.1115C>G		p.S372*			1.8e-05	0.586377	1	0
SPATA21	1	16730535	C	T	SpliceSite	NM_198546	c.812-1G>A					0	0.597158	0	1
SPATA21	1	16735643	CG	C	Frameshift	NM_198546	c.642delC	c.641delC				0	0.597158	0	1
SPATA21	1	16735651	TC	T	Frameshift	NM_198546	c.634delG	c.632delG				6.5e-05	0.470784	1	0
SPATA21	1	16748416	CT	C	Frameshift	NM_198546	c.84delA	c.79delA				0	0.597158	0	1
SUPT3H	6	44900389	C	T	SpliceSite	NM_181356	c.945+1G>A					0	0.625005	1	0
SUPT3H	6	44922324	G	A	StopGain	NM_181356	c.634C>T		p.R212*			0	0.625005	0	1
SUPT3H	6	44929507	CTT	C	Frameshift	NM_181356	c.594_595delAA	c.593_594delAA				0.00093	0.347317	2	1
SUPT3H	6	44971449	C	A	StopGain	NM_181356	c.478G>T		p.E160*			0	0.625005	0	1
SUPT3H	6	44971482	G	A	StopGain	NM_181356	c.445C>T		p.Q149*			0	0.625005	1	0
SUPT3H	6	45289532	C	A	SpliceSite	NM_181356	c.134+1G>T					0.0024	0.305148	2	2
SUPT3H	6	45289541	AT	A	Frameshift	NM_181356	c.125delA					0	0.625005	1	0
TAB1	22	39811557	C	T	StopGain	NM_006116	c.223C>T		p.R75*			1.8e-05	0.614224	0	1
TAB1	22	39811625	CGCCG	C	Frameshift	NM_006116	c.292_295delGCCG					1.8e-05	0.614224	1	0
TAB1	22	39824037	C	T	StopGain	NM_006116	c.1156C>T		p.R386*			1.8e-05	0.614224	0	1
TAB1	22	39826147	G	T	StopGain	NM_006116	c.1435G>T		p.E479*			0	0.625005	1	0
TCF7	5	133478792	G	A	SpliceSite	NM_003202	c.1026+1G>A					0	0.618043	1	0
TCF7	5	133479316	C	T	StopGain	NM_003202	c.1060C>T		p.Q354*			0	0.618043	1	0
TIAM2	6	155451498	C	T	StopGain	NM_012454	c.1141C>T		p.R381*			6.6e-05	0.449468	0	1
TIAM2	6	155458525	GG	G	Frameshift	NM_012454	c.1410delG	c.1409delG				0	-0.00850966	2	0
TIAM2	6	155458730	C	G	StopGain	NM_012454	c.1614C>G		p.Y538*			0	0.618043	1	0
TIAM2	6	155485545	TAAGA	T	SpliceSite	NM_012454	c.2029-3_2029delAAGA					0	0.409192	1	1
TIAM2	6	155486395	A	G	SpliceSite	NM_012454	c.2215-2A>G					0	0.186418	0	1
TIAM2	6	155503404	CGG	C	Frameshift	NM_012454	c.2753_2754delGG					2.7e-05	0.128186	1	0
TIAM2	6	155503407	A	AAT	Frameshift	NM_012454	c.2755_2756insAT					2.7e-05	0.211727	1	0
TIAM2	6	155503453	G	T	SpliceSite	NM_012454	c.2800+1G>T					2.7e-05	0.22565	2	1
TMEM161A	19	19231671	C	T	SpliceSite	NM_017814	c.1090-1G>A			rs528676126	3.18573e-05	0	0.625005	1	0
TMEM161A	19	19232136	CA	C	Frameshift	NM_017814	c.894delT	c.892delT			5.34828e-06	1.3e-05	0.625005	1	0
TMEM161A	19	19243524	CACAG	C	Frameshift	NM_017814	c.224_227delCTGT	c.220_223delCTGT				0	0.625005	0	1
TMEM206/PACC1	1	212548596	C	CT	Frameshift	NM_018252	c.829_830insA	c.822_823insA		rs767364487	0.000141462	0.00057	-0.199284	1	1
TMEM206/PACC1	1	212553237	CT	C	Frameshift	NM_018252	c.637delA	c.635delA		rs1412689327	3.18492e-05	0	0.464886	0	1
TMEM206/PACC1	1	212553243	AG	A	Frameshift	NM_018252	c.631delC	c.630delC		rs532279691	0.00206188	0.006	-0.15285	52	29
TMEM206/PACC1	1	212558747	G	A	StopGain	NM_018252	c.364C>T		p.Q122*	rs546059287	1.19358e-05	2.7e-05	0.55285	1	1
TMEM206/PACC1	1	212588066	C	A	StopGain	NM_018252	c.34G>T		p.E12*	rs141336201	0.000103143	0.00013	0.341895	2	1
TNC	9	117797538	CG	C	Frameshift	NM_002160	c.5731delC	c.5725delC				6.6e-05	0.4982	0	1
TNC	9	117808709	ACTGT	A	Frameshift	NM_002160	c.5101_5104delACAG	c.5098_5101delCAGA				0	0.625005	0	1
TNC	9	117808756	G	T	StopGain	NM_002160	c.5058C>A		p.Y1686*			0	0.625005	0	1
TNC	9	117808853	A	AT	Frameshift	NM_002160	c.4960_4961insA	c.4956_4957insA				1.8e-05	0.614224	0	1
TNC	9	117810670	TC	T	Frameshift	NM_002160	c.4720delG	c.4719delG				0	0.625005	0	1
TNC	9	117819540	G	A	StopGain	NM_002160	c.4471C>T		p.R1491*			1.8e-05	0.614224	1	0
TNC	9	117822008	C	T	SpliceSite	NM_002160	c.4306+1G>A					3.5e-05	0.551708	0	1
TNC	9	117838401	C	A	SpliceSite	NM_002160	c.2861-1G>T					0	0.625005	1	0
TNC	9	117838741	TG	T	Frameshift	NM_002160	c.2787delC	c.2783delC				0	0.625005	0	0
TNC	9	117848395	G	A	StopGain	NM_002160	c.1615C>T		p.Q539*			0.00032	0.412988	0	0
TNK1	17	7286826	G	GG	Frameshift	NM_003985	c.317_318insG	c.311_312insG				0.00017	-0.143865	6	8
TNK1	17	7287288	G	A	SpliceSite	NM_003985	c.583-1G>A					0	0.346537	1	0
TNK1	17	7287905	CTGGGCCGGGGTCCC	C	Frameshift	NM_003985	c.970_983delTGGGCCGGGGTCCC	c.967_980delCCCTGGGCCGGGGT				9.2e-06	0.555388	1	2
TNK1	17	7287938	GC	G	Frameshift	NM_003985	c.1003delC					6.9e-05	-0.0252289	1	4
TNK1	17	7291802	C	T	StopGain	NM_003985	c.1555C>T		p.R519*			0.00033	0.363261	3	2
TNK1	17	7291895	G	T	StopGain	NM_003985	c.1648G>T		p.E550*			0.00017	0.399148	0	2
TNK1	17	7292115	GAGTG	G	Frameshift	NM_003985	c.1786_1789delAGTG	c.1784_1787delTGAG				0	0.332614	1	0
TP53	17	7574003	G	A	StopGain	NM_000546	c.1024C>T		p.R342*			0	0.625005	2	0
TP53	17	7577022	G	A	StopGain	NM_000546	c.916C>T		p.R306*			0	0.625005	1	0
TP53	17	7577045	TCGTGGTGAGG	T	Frameshift	NM_000546	c.883_892delCCTCACCACG	c.882_891delGCCTCACCAC				0	0.625005	1	0
TP53	17	7578212	G	A	StopGain	NM_000546	c.637C>T		p.R213*			0	0.625005	0	0
TP53	17	7578231	C	CA	Frameshift	NM_000546	c.617_618insT	c.614_615insT				0	0.625005	1	0
TP53	17	7578263	G	A	StopGain	NM_000546	c.586C>T		p.R196*			9e-06	0.625005	1	0
TP53	17	7578417	CTCCG	C	Frameshift	NM_000546	c.509_512delCGGA	c.507_510delGACG				0	0.625005	1	0
TP53	17	7578463	CGGGTGCCGGGCGG	C	Frameshift	NM_000546	c.454_466delCCGCCCGGCACCC	c.449_461delCACCCCCGCCCGG				0	0.625005	1	0
TP53	17	7579357	A	ACGGAAAC	Frameshift	NM_000546	c.329_330insGTTTCCG	c.320_321insCGGTTTC				0	0.625005	1	0
TP53	17	7579378	G	C	StopGain	NM_000546	c.309C>G		p.Y103*			0	0.625005	0	1
TP53	17	7579470	C	CG	Frameshift	NM_000546	c.216_217insC	c.210_211insC				0	0.625005	1	0
TP53	17	7579558	CA	C	StopGain	NM_000546	c.128delT	c.126delT	p.L43_D393del			0	0.625005	1	0
TP53TG5	20	44002653	T	A	SpliceSite	NM_014477	c.769-2A>T					0.001	0.0202755	1	0
TP53TG5	20	44003900	G	A	StopGain	NM_014477	c.547C>T		p.R183*			0.00023	0.0387263	2	2
TP53TG5	20	44004074	C	A	StopGain	NM_014477	c.373G>T		p.E125*			0	0.158571	0	1
TP53TG5	20	44004121	TC	T	Frameshift	NM_014477	c.325delG	c.324delG				0	0.207303	1	0
TP53TG5	20	44004193	C	T	SpliceSite	NM_014477	c.255-1G>A					9.1e-06	0.346537	1	0
TP53TG5	20	44004194	T	C	SpliceSite	NM_014477	c.255-2A>G					0.00021	0.057826	2	1
TRIM42	3	140397371	C	CCACA	Frameshift	NM_152616	c.300_301insCACA					9.1e-06	-0.161667	1	1
TRIM42	3	140397373	TC	T	Frameshift	NM_152616	c.303delC					9.1e-06	-0.161667	1	1
TRIM42	3	140397413	G	A	SpliceSite	NM_152616	c.341+1G>A					0.00029	-0.0435437	1	3
TRIM42	3	140406641	C	T	StopGain	NM_152616	c.1117C>T		p.R373*			0.00012	0.321683	0	1
TRIM42	3	140409846	TTT	T	StopGain	NM_152616	c.1898_1899delTT	c.1896_1897delTT	p.F633_F723del			0	0.597158	1	0
TRIM63	1	26380456	C	T	SpliceSite	NM_032588	c.980-1G>A					3.8e-05	0.240378	1	0
TRIM63	1	26383771	CCCTGCTCTGTCTT	C	Frameshift	NM_032588	c.889_901delAAGACAGAGCAGG	c.887_899delGGAAGACAGAGCA				0	0.618043	0	1
TRIM63	1	26383819	C	T	SpliceSite	NM_032588	c.855-1G>A					0	0.457924	0	1
TRIM63	1	26384879	A	C	SpliceSite	NM_032588	c.831+2T>G					1.8e-05	0.370565	0	1
TRIM63	1	26384954	AGCTGCTCCTG	A	Frameshift	NM_032588	c.748_757delCAGGAGCAGC	c.747_756delCCAGGAGCAG				0	0.618043	0	1
TRIM63	1	26384973	G	A	StopGain	NM_032588	c.739C>T		p.Q247*			0.00047	0.338138	10	8
TRIM63	1	26386768	G	A	StopGain	NM_032588	c.586C>T		p.R196*			5.8e-05	0.458531	0	1
TRIM63	1	26386835	A	T	StopGain	NM_032588	c.519T>A		p.C173*			6.3e-05	0.429871	0	1
TRIM63	1	26387675	ACT	A	Frameshift	NM_032588	c.481_482delAG	c.479_480delAG				6.5e-05	-0.0304585	2	2
TRIO	5	14398986	TAGGG	T	SpliceSite	NM_007118	c.4424-2_4425delAGGG					0	0.625005	5	2
TRIO	5	14419884	CA	C	Intronic	NM_007118	c.4960-2delA					0	0.625005	1	0
TRIO	5	14485174	TAAGGTGAG	T	SpliceSite	NM_007118	c.6658-3_6662delAAGGTGAG					0	0.625005	12	10
TRIO	5	14488051	CGC	C	StopGain	NM_007118	c.7315_7316delGC	c.7308_7309delCG	p.A2439_V3097del			0	0.625005	1	1
TRIO	5	14497034	G	T	StopGain	NM_007118	c.7927G>T		p.E2643*			0	0.625005	0	1
TRPM1	15	31320657	A	T	StopGain	NM_002420	c.3105T>A		p.Y1035*			0	0.506656	2	1
TRPM1	15	31321573	C	T	SpliceSite	NM_002420	c.3082+1G>A					5.8e-05	0.354106	1	0
TRPM1	15	31323249	G	A	StopGain	NM_002420	c.2998C>T		p.R1000*			0.00013	0.432397	2	0
TRPM1	15	31325061	GC	G	Frameshift	NM_002420	c.2716delG	c.2715delG				0	0.618043	0	1
TRPM1	15	31327816	C	T	StopGain	NM_002420	c.2567G>A		p.W856*			1.8e-05	0.593339	1	0
TRPM1	15	31332468	G	C	StopGain	NM_002420	c.2103C>G		p.Y701*			0	0.409192	1	0
TRPM1	15	31339349	GA	G	Frameshift	NM_002420	c.1662delT	c.1660delT				0	0.395269	1	0
TRPM1	15	31352782	G	A	StopGain	NM_002420	c.1162C>T		p.R388*			5.8e-05	0.444608	1	0
TRPM1	15	31358324	G	A	StopGain	NM_002420	c.679C>T		p.R227*			9e-06	0.52058	1	0
TRPM1	15	31359391	C	G	SpliceSite	NM_002420	c.428-1G>C					3e-05	0.400236	1	3
TRPM1	15	31369122	C	T	Translation	NM_002420	c.3G>A		p.M1I			0.00054	-0.53563	1	0
TRPM4	19	49661459	CC	C	Frameshift	NM_017636	c.36delC	c.33delC				9e-06	0.499694	1	0
TRPM4	19	49661517	G	A	SpliceSite	NM_017636	c.92+1G>A					0	0.297805	0	1
TRPM4	19	49669452	G	GG	Frameshift	NM_017636	c.247_248insG	c.242_243insG				6.8e-05	-0.177951	1	3
TRPM4	19	49674835	C	T	StopGain	NM_017636	c.859C>T		p.R287*			5.8e-05	0.451569	1	0
TRPM4	19	49674976	C	T	StopGain	NM_017636	c.1000C>T		p.R334*			6e-05	0.349428	1	0
TRPM4	19	49675280	G	GTC	Frameshift	NM_017636	c.1065_1066insTC					0	0.0889541	0	1
TRPM4	19	49684649	TTTGGCTGT	T	Frameshift	NM_017636	c.1195_1202delTTGGCTGT	c.1193_1200delGTTTGGCT				2.7e-05	0.525003	0	2
TRPM4	19	49684714	G	A	StopGain	NM_017636	c.1259G>A		p.W420*			5.8e-05	0.479416	0	1
TRPM4	19	49684720	T	G	SpliceSite	NM_017636	c.1263+2T>G					0	0.36046	0	1
TRPM4	19	49686146	G	A	StopGain	NM_017636	c.1575G>A		p.W525*			0.0022	-0.160855	20	45
TRPM4	19	49686180	G	A	SpliceSite	NM_017636	c.1608+1G>A					6.1e-05	0.0130215	1	0
TRPM4	19	49692330	T	TTCTTT	Frameshift	NM_017636	c.2001_2002insTCTTT	c.1995_1996insTTCTT				0	0.332614	1	0
TRPM4	19	49692334	C	T	StopGain	NM_017636	c.2005C>T		p.Q669*			0	0.60412	0	1
TRPM4	19	49699740	C	T	StopGain	NM_017636	c.2254C>T		p.Q752*			0.00018	0.200829	11	1
TRPM4	19	49699774	GC	G	Frameshift	NM_017636	c.2289delC					0	0.262997	1	0
TRPM4	19	49699781	G	GG	Frameshift	NM_017636	c.2295_2296insG	c.2289_2290insG				8.1e-05	-0.141953	2	0
TRPM4	19	49699998	GG	G	Frameshift	NM_017636	c.2513delG	c.2509delG				3.2e-05	-0.124668	0	1
TRPM4	19	49703575	CC	C	Frameshift	NM_017636	c.2665delC	c.2664delC				0.00028	0.228928	2	0
TRPM4	19	49703651	A	T	StopGain	NM_017636	c.2740A>T		p.K914*			0.002	0.215507	19	17
TRPM4	19	49703938	G	GACAC	Frameshift	NM_017636	c.2849_2850insACAC					0	0.186418	1	1
TRPM4	19	49703945	GA	G	Frameshift	NM_017636	c.2857delA					0	0.388307	1	1
TRPM4	19	49703948	GCC	G	Frameshift	NM_017636	c.2860_2861delCC					0	0.0819924	1	1
TRPM4	19	49705266	G	A	StopGain	NM_017636	c.2999G>A		p.W1000*			0	0.569311	1	0
TRPM4	19	49713553	C	CC	Frameshift	NM_017636	c.3219_3220insC	c.3216_3217insC				0	0.283882	0	1
TRPM4	19	49713990	G	T	StopGain	NM_017636	c.3352G>T		p.E1118*			0	0.569311	0	0
TRPM4	19	49714341	GGAGGTGAGG	G	SpliceSite	NM_017636	c.3532_3534+6delGAGGTGAGG	c.3530_3534+4delGGGAGGTGA				0	0.548426	0	1
TSEN2	3	12533649	A	AAA	Frameshift	NM_025265	c.204_205insAA	c.200_201insAA				9e-06	0.618043	0	1
TSEN2	3	12545143	C	T	StopGain	NM_025265	c.691C>T		p.Q231*			0	0.618043	0	1
TSEN2	3	12560697	G	A	SpliceSite	NM_025265	c.1099+1G>A					0.00016	0.437263	1	0
TTC6	14	38091254	G	A	SpliceSite	NM_001310135	c.34-1G>A					0	-0.161667	1	0
TTC6	14	38091451	G	GGCCCG	Frameshift	NM_001310135	c.230_231insGCCCG	c.216_217insCCCGG				0.0004	-0.410947	2	0
TTC6	14	38184002	GT	G	Intronic	NM_001310135	c.1761+2delT					0	0.367422	1	0
TTC6	14	38184002	G	A	SpliceSite	NM_001310135	c.1761+1G>A					4.2e-05	0.28211	1	0
TTC6	14	38205151	CT	C	Frameshift	NM_001310135	c.1893delT					0	-0.154705	0	1
TTC6	14	38205168	A	T	StopGain	NM_001310135	c.1909A>T		p.K637*			0	0.353499	1	0
TTC6	14	38207981	C	T	StopGain	NM_001310135	c.2032C>T		p.R678*			2.6e-05	0.494369	1	0
TTC6	14	38208089	G	T	StopGain	NM_001310135	c.2140G>T		p.E714*			0	0.332614	1	0
TTC6	14	38218142	A	C	SpliceSite	NM_001310135	c.2412-2A>C					0	0.242112	0	1
TTC6	14	38218484	GTGAAG	G	Frameshift	NM_001310135	c.2753_2757delTGAAG	c.2748_2752delTGAAG				0.00023	0.150114	1	1
TTC6	14	38219039	AA	A	Frameshift	NM_001310135	c.2996delA	c.2992delA				0.00033	-0.249368	3	3
TTC6	14	38222302	A	G	SpliceSite	NM_001310135	c.3178-2A>G					0	0.186418	1	0
TTC6	14	38222436	GCAAG	G	Frameshift	NM_001310135	c.3311_3314delCAAG	c.3307_3310delCAAG				0	0.430077	0	1
TTC6	14	38256699	AA	A	Frameshift	NM_001310135	c.3342delA	c.3340delA				0	0.569311	0	1
TTC6	14	38256716	G	T	StopGain	NM_001310135	c.3358G>T		p.E1120*			0	0.388307	1	0
TTC6	14	38256782	C	T	StopGain	NM_001310135	c.3424C>T		p.R1142*			0.00016	0.367646	0	1
TTC6	14	38260043	G	A	SpliceSite	NM_001310135	c.3605+1G>A					0.00065	0.197443	4	8
TTC6	14	38261544	G	A	StopGain	NM_001310135	c.3681G>A		p.W1227*			0	0.36046	0	1
TTC6	14	38276537	C	T	StopGain	NM_001310135	c.4375C>T		p.R1459*			8.4e-05	0.462346	1	1
TTC6	14	38293138	AA	A	Frameshift	NM_001310135	c.4999delA	c.4998delA				9.2e-06	0.311729	1	0
TTC6	14	38295392	TATTTTAGGCCCAAGGAAAATT	T	SpliceSite	NM_001310135	c.5023-7_5036delATTTTAGGCCCAAGGAAAATT	c.5023-15_5028delGGAAAATTATTTTAGGCCCAA				0.007	0.291731	78	63
TTC6	14	38296489	AT	A	Frameshift	NM_001310135	c.5265delT					0.00026	0.182107	0	4
TTC6	14	38296568	CC	C	Frameshift	NM_001310135	c.5344delC	c.5342delC				0	0.625005	0	1
TTC6	14	38310713	C	T	StopGain	NM_001310135	c.5410C>T		p.R1804*			7.6e-05	0.472926	1	0
TTC6	14	38311355	TGCAGCCCTGTC	T	SpliceSite	NM_001310135	c.5573-4_5579delGCAGCCCTGTC					0	0.36046	1	0
TYRO3	15	41853427	G	A	StopGain	NM_006293	c.227G>A		p.W76*	rs1411195682	3.978e-06	0	0.625005	1	0
TYRO3	15	41853508	G	GCCTGAAGTCA	Frameshift	NM_006293	c.308_308+1insCCTGAAGTCA			rs773930671	0.002854	0	0.625005	116	71
TYRO3	15	41854917	G	GGGTGACCCAGAGCACCATGTTT	Intronic	NM_006293	c.580+1_580+2insGGTGACCCAGAGCACCATGTTT					0	0.625005	2	0
TYRO3	15	41854917	G	GGGTGACCCAGAGCACCATGT	Intronic	NM_006293	c.580+1_580+2insGGTGACCCAGAGCACCATGT					0	0.625005	2	1
TYRO3	15	41856468	G	GCACTGCCTGCAGCCCCCTTCAACATCACCGT	Frameshift	NM_006293	c.667_667+1insCACTGCCTGCAGCCCCCTTCAACATCACCGT					0	0.625005	0	2
TYRO3	15	41856468	G	GCACTGCCTGCAGCCCCCTTCAACATCACC	Frameshift	NM_006293	c.667_667+1insCACTGCCTGCAGCCCCCTTCAACATCACC					0	0.625005	2	2
TYRO3	15	41861221	G	GCC	Intronic	NM_006293	c.1252+1_1252+2insCC			rs1226372130	3.547e-06	0	0.625005	1	1
TYRO3	15	41862538	TGTGAG	T	Intronic	NM_006293	c.1483+1_1483+5delGTGAG			rs773167332	4.82397e-05	0.00015	0.44745	2	3
TYRO3	15	41863316	G	GCT	Frameshift	NM_006293	c.1660_1660+1insCT			rs754388681	1.591e-05	3.2e-05	0.557578	2	6
TYRO3	15	41864762	T	TAACCTACCCCTCCAGACCCTGATCCG	Frameshift	NM_006293	c.1875_1875+1insAACCTACCCCTCCAGACCCTGATCCG			rs773540028	0.0001173	0	0.625005	0	2
TYRO3	15	41864762	T	TAACCTACCCCTCCAGACCCTGATCC	Frameshift	NM_006293	c.1875_1875+1insAACCTACCCCTCCAGACCCTGATCC			rs773540028	4.976e-05	0	0.625005	0	1
TYRO3	15	41865310	G	GC	Intronic	NM_006293	c.1985+1_1985+2insC			rs766990473	0.000288	0.00047	0.393832	2	0
TYRO3	15	41865665	G	GTGGGCGTTCGGGGTGACCAT	Frameshift	NM_006293	c.2145_2145+1insTGGGCGTTCGGGGTGACCAT			rs769980669	0.000157	0	0.625005	1	0
UBE2U	1	64669751	CC	C	Frameshift	NM_152489	c.19delC	c.18delC				0	0.207303	0	1
UBE2U	1	64669755	TTGCTGCACAGA	T	StopGain	NM_152489	c.23_33delTGCTGCACAGA		p.L8_K226del			0	0.576273	1	1
UBE2U	1	64671321	GGG	G	Frameshift	NM_152489	c.67_68delGG	c.67-1_67delGG				0	0.172495	0	4
UBE2U	1	64671323	G	GCACT	Frameshift	NM_152489	c.68_69insCACT					0	0.109839	0	4
UBE2U	1	64671325	AT	A	Frameshift	NM_152489	c.71delT					0	0.256035	0	4
UBE2U	1	64676469	CC	C	Frameshift	NM_152489	c.287delC	c.285delC				0.0016	-0.496088	7	3
UBE2U	1	64676509	T	G	StopGain	NM_152489	c.326T>G		p.L109*			0	0.60412	1	0
UBE2U	1	64686541	G	C	SpliceSite	NM_152489	c.458-1G>C					0	-0.266093	0	1
UBE2U	1	64707361	C	T	StopGain	NM_152489	c.622C>T		p.Q208*			0.01	-0.0244949	0	1
USP5	12	6964957	CC	C	Frameshift	NM_003481	c.277delC	c.274delC				0	0.625005	0	1
USP5	12	6966057	T	A	SpliceSite	NM_003481	c.769+2T>A					0	0.625005	1	0
UVSSA	4	1341906	AG	A	Frameshift	NM_020894	c.28delG					0	0.569311	0	1
UVSSA	4	1343409	G	T	StopGain	NM_020894	c.196G>T		p.E66*			0	0.56235	0	1
UVSSA	4	1343426	GT	G	Frameshift	NM_020894	c.214delT					0	0.290843	0	1
UVSSA	4	1343532	C	T	StopGain	NM_020894	c.319C>T		p.Q107*			0	0.569311	1	0
UVSSA	4	1346880	CC	C	Frameshift	NM_020894	c.614delC	c.613delC				0	0.0959158	0	1
UVSSA	4	1348628	G	A	StopGain	NM_020894	c.1040G>A		p.W347*			6.6e-05	0.435545	1	0
UVSSA	4	1349030	C	CC	Frameshift	NM_020894	c.1173_1174insC	c.1172_1173insC				0	-0.126859	0	1
UVSSA	4	1360110	AGA	A	Frameshift	NM_020894	c.1180_1181delGA	c.1179_1180delAG				0	0.36046	1	0
UVSSA	4	1369250	C	T	StopGain	NM_020894	c.1387C>T		p.Q463*			1.8e-05	0.544607	1	3
UVSSA	4	1369918	C	G	StopGain	NM_020894	c.1530C>G		p.Y510*			0	0.597158	0	2
UVSSA	4	1374758	C	T	StopGain	NM_020894	c.1843C>T		p.Q615*			0	0.499694	1	0
UVSSA	4	1377700	GC	G	Frameshift	NM_020894	c.2009delC					0	0.0123754	1	0
WRNIP1	6	2766366	CGA	C	Frameshift	NM_020135	c.511_512delGA					0	0.625005	1	0
WRNIP1	6	2766369	CGGCGATGGCG	C	Frameshift	NM_020135	c.514_523delGGCGATGGCG					0	0.625005	1	0
WRNIP1	6	2766580	C	CGGGC	Frameshift	NM_020135	c.724_725insGGGC	c.719_720insCGGG				0	0.625005	1	0
WRNIP1	6	2779716	T	G	StopGain	NM_020135	c.1476T>G		p.Y492*			0	0.625005	1	0
XDH	2	31560605	G	A	StopGain	NM_000379	c.3853C>T		p.Q1285*			1.8e-05	0.614224	1	0
XDH	2	31564189	CCTCACCTGTCCAATATCAATGGC	C	SpliceSite	NM_000379	c.3568_3585+5delGCCATTGATATTGGACAGGTGAG	c.3570_3585+7delCATTGATATTGGACAGGTGAGGC				0	0.625005	1	0
XDH	2	31564194	C	A	SpliceSite	NM_000379	c.3585+1G>T					0	0.625005	1	0
XDH	2	31565128	G	C	StopGain	NM_000379	c.3440C>G		p.S1147*			0	0.625005	1	0
XDH	2	31571769	T	TCC	Frameshift	NM_000379	c.3046_3047insGG					0	0.625005	1	0
XDH	2	31571770	TCAGAAAAG	T	Frameshift	NM_000379	c.3038_3045delCTTTTCTG					0	0.625005	1	0
XDH	2	31588394	G	A	StopGain	NM_000379	c.2473C>T		p.R825*			6.5e-05	0.498631	0	1
XDH	2	31588927	G	A	StopGain	NM_000379	c.2371C>T		p.R791*			3e-05	0.567317	1	0
XDH	2	31590833	CA	C	Frameshift	NM_000379	c.2190delT	c.2189delT				2.7e-05	0.580697	1	0
XDH	2	31591465	CTCTG	C	Frameshift	NM_000379	c.2038_2041delCAGA	c.2037_2040delACAG				0	0.625005	0	1
XDH	2	31596738	C	G	SpliceSite	NM_000379	c.1686+1G>C					0.0013	0.329504	8	9
XDH	2	31596760	TG	T	Frameshift	NM_000379	c.1664delC	c.1659delC				0	0.625005	1	0
XDH	2	31605974	T	TG	Frameshift	NM_000379	c.930_931insC					9.9e-05	0.482603	0	1
XDH	2	31609361	G	A	StopGain	NM_000379	c.712C>T		p.Q238*			0	0.625005	1	0
XDH	2	31609391	G	A	StopGain	NM_000379	c.682C>T		p.R228*			0.00013	0.460244	1	0
XDH	2	31609422	C	A	SpliceSite	NM_000379	c.652-1G>T					0	0.625005	0	1
XDH	2	31610681	A	AGC	Frameshift	NM_000379	c.646_647insGC					0	0.625005	0	1
XDH	2	31610686	TG	T	Frameshift	NM_000379	c.641delC	c.637delC				0.00013	0.460244	2	2
XDH	2	31621475	C	CG	Frameshift	NM_000379	c.396_397insC	c.393_394insC				9e-06	0.625005	0	1
XDH	2	31625970	G	GC	Frameshift	NM_000379	c.140_141insG	c.134_135insG				0.001	0.340514	0	1
XDH	2	31625976	CT	C	Frameshift	NM_000379	c.134delA					0	0.625005	2	0
XDH	2	31626012	T	C	SpliceSite	NM_000379	c.101-2A>G					0	0.625005	1	0
ZFAND1	8	82627228	C	CA	Frameshift	NM_024699	c.259_260insT	c.254_255insT		rs777944309	4.95365e-05	0.00033	0.411993	3	0
ZFAND1	8	82627299	TG	T	Frameshift	NM_024699	c.188delC	c.186delC				0	0.625005	0	1
ZFAND1	8	82627302	G	C	StopGain	NM_024699	c.186C>G		p.Y62*	rs150915150	0.000251646	0.00048	0.39238	2	3
ZFAND1	8	82627303	T	TCC	Frameshift	NM_024699	c.184_185insGG					0	0.625005	0	1
ZFAND1	8	82627348	ACCTG	A	SpliceSite	NM_024699	c.139-3_139delCAGG			rs1260212806	3.561e-06	0	0.625005	53	27
ZFAND1	8	82627349	CCTG	C	Intronic	NM_024699	c.139-3_139-1delCAG					0	0.625005	1	0
ZWINT	10	58118321	AAGGACACACC	A	Frameshift	NM_007057	c.778_787delGGTGTGTCCT	c.775_784delCCTGGTGTGT				2.7e-05	-0.115473	1	1
ZWINT	10	58118324	GAC	G	Frameshift	NM_007057	c.783_784delGT	c.779_780delGT				0	-0.071165	1	0
ZWINT	10	58118588	G	A	StopGain	NM_007057	c.601C>T		p.Q201*			4.5e-05	0.241798	1	0
ZWINT	10	58119779	G	A	StopGain	NM_007057	c.256C>T		p.R86*			4.5e-05	0.401917	1	1
ZWINT	10	58120956	C	T	SpliceSite	NM_007057	c.41+1G>A					3.3e-05	0.325213	1	0
ZWINT	10	58120963	GCTGCAGCTTCCGCCTCTGTCTCCGCTGC	G	Frameshift	NM_007057	c.7_34delGCAGCGGAGACAGAGGCGGAAGCTGCAG	c.5_32delAGGCAGCGGAGACAGAGGCGGAAGCTGC				0	0.367422	1	0
* The MaxAF is a pre-computed value extracted for a MaxAF database which is calculated from the UK10K whole genome cohorts ALSPAC and TWINSUK, the 1000 Genomes Project, and the gnomAD. Several quality control filters (HWE p>0.000001, VQSLOD>-5.368 for SNV and >-4.208 for InDel, AN>=200) were applied before computing allele frequency.

## Sheet: Table S3B
List of rare missense variants identifed at the validation stage
Gene symbol	CHROM	POSITION (GRCh37)	REF	ALT	Func_Type	Func_Detail			gnomAD	AF gnomAD (Total)	MaxAF	BayesDel	All.carrier.cs	All.carrier.ct
						CDS coding region	Nucleotide change	Protein change
ABCC2	10	101542624	C	T	Missense	NM_000392	c.23C>T	p.S8F	rs375147383	5.65951e-05	9e-05	0.181097	1	1
ABCC2	10	101544437	C	T	Missense	NM_000392	c.106C>T	p.P36S			0	0.311729	1	0
ABCC2	10	101552084	T	G	Missense	NM_000392	c.301T>G	p.Y101D			0	0.256035	0	1
ABCC2	10	101552115	G	T	Missense	NM_000392	c.332G>T	p.W111L			0	0.242112	1	0
ABCC2	10	101560246	C	A	Missense	NM_000392	c.1135C>A	p.Q379K			0	0.450963	1	0
ABCC2	10	101560289	G	A	Missense	NM_000392	c.1178G>A	p.R393Q	rs763509429	3.89389e-05	7.2e-05	0.31458	0	2
ABCC2	10	101563957	T	C	Missense	NM_000392	c.1391T>C	p.L464S	rs755457692	3.98083e-06	9e-06	0.297805	1	0
ABCC2	10	101565166	C	T	Missense	NM_000392	c.1492C>T	p.R498C	rs754633636	1.99008e-05	3.6e-05	0.369053	1	0
ABCC2	10	101565167	G	A	Missense	NM_000392	c.1493G>A	p.R498H	rs186620377	5.66107e-05	0.00012	0.328644	3	0
ABCC2	10	101567195	C	T	Missense	NM_000392	c.1585C>T	p.R529W	rs138799687	0.000115519	0.00062	0.185865	1	1
ABCC2	10	101567196	G	A	Missense	NM_000392	c.1586G>A	p.R529Q	rs781337846	4.3816e-05	0.00015	0.294292	0	1
ABCC2	10	101567850	T	G	Missense	NM_000392	c.1679T>G	p.V560G			0	0.0750307	1	0
ABCC2	10	101567940	G	A	Missense	NM_000392	c.1769G>A	p.R590H	rs751940502	6.01493e-05	0.00012	0.14764	0	0
ABCC2	10	101569909	C	T	Missense	NM_000392	c.1834C>T	p.R612W	rs777791701	3.98026e-06	9e-06	0.527541	0	1
ABCC2	10	101572827	G	A	Missense	NM_000392	c.2020G>A	p.G674S	rs778892744	4.60109e-05	6.3e-05	0.443795	2	0
ABCC2	10	101577182	G	A	Missense	NM_000392	c.2212G>A	p.A738T	rs775692370	7.96026e-06	1.8e-05	0.342718	0	1
ABCC2	10	101578566	G	T	Missense	NM_000392	c.2291G>T	p.G764V			0	0.576273	1	0
ABCC2	10	101578571	A	C	Missense	NM_000392	c.2296A>C	p.K766Q	rs1369784733	3.18492e-05	0	0.304767	1	0
ABCC2	10	101578577	C	T	Missense	NM_000392	c.2302C>T	p.R768W	rs56199535	8.84273e-05	0.00058	0.23071	4	1
ABCC2	10	101578578	G	A	Missense	NM_000392	c.2303G>A	p.R768Q	rs536840524	3.18299e-05	6.5e-05	0.37332	0	2
ABCC2	10	101578581	T	C	Missense	NM_000392	c.2306T>C	p.I769T	rs762655590	3.97861e-06	0	0.36046	1	0
ABCC2	10	101578634	C	T	Missense	NM_000392	c.2359C>T	p.P787S			0	0.457924	1	0
ABCC2	10	101578655	C	T	Missense	NM_000392	c.2380C>T	p.H794Y	rs201303732	7.16686e-05	0.00013	0.251393	0	1
ABCC2	10	101578697	G	A	Missense	NM_000392	c.2422G>A	p.G808S	rs750292336	1.19511e-05	2.7e-05	0.30919	1	0
ABCC2	10	101578850	G	T	Missense	NM_000392	c.2444G>T	p.R815L			0	0.116801	0	1
ABCC2	10	101590514	C	T	Missense	NM_000392	c.2789C>T	p.S930F	rs765088337	7.95507e-06	1.8e-05	0.140829	1	0
ABCC2	10	101591492	G	T	Missense	NM_000392	c.3008G>T	p.W1003L	rs147566977	0.000261615	0.00051	0.227806	2	7
ABCC2	10	101591545	G	C	Missense	NM_000392	c.3061G>C	p.D1021H	rs753889614	3.9776e-06	3.2e-05	0.411382	0	1
ABCC2	10	101591552	G	T	Missense	NM_000392	c.3068G>T	p.R1023I	rs374311166	1.59103e-05	3.6e-05	0.3969	0	1
ABCC2	10	101591566	G	A	Missense	NM_000392	c.3082G>A	p.G1028R	rs148887680	5.30474e-05	9e-05	0.306408	0	1
ABCC2	10	101591785	C	G	Missense	NM_000392	c.3155C>G	p.A1052G	rs776490975	3.97646e-06	9e-06	0.283882	0	1
ABCC2	10	101591866	G	A	Missense	NM_000392	c.3236G>A	p.R1079Q	rs145672804	0.000583294	0.00083	0.21027	6	6
ABCC2	10	101591882	T	A	Missense	NM_000392	c.3252T>A	p.F1084L			0	0.339575	0	1
ABCC2	10	101594150	T	C	Missense	NM_000392	c.3272T>C	p.V1091A	rs773384396	3.97753e-05	9e-05	0.090595	1	1
ABCC2	10	101594155	G	C	Missense	NM_000392	c.3277G>C	p.D1093H			0	0.102878	1	0
ABCC2	10	101594176	C	A	Missense	NM_000392	c.3298C>A	p.R1100S	rs142715085	0.000106063	0.00022	0.158472	1	0
ABCC2	10	101594176	C	T	Missense	NM_000392	c.3298C>T	p.R1100C	rs142715085	0.000498497	0.00087	0.150992	10	6
ABCC2	10	101594177	G	A	Missense	NM_000392	c.3299G>A	p.R1100H	rs145186820	3.53544e-05	6.5e-05	0.178393	0	2
ABCC2	10	101594266	C	T	Missense	NM_000392	c.3388C>T	p.L1130F	rs1434370656	3.97627e-06	9e-06	0.0889541	1	0
ABCC2	10	101594267	T	C	Missense	NM_000392	c.3389T>C	p.L1130P	rs779062798	3.97627e-06	9e-06	0.256035	1	0
ABCC2	10	101595869	C	T	Missense	NM_000392	c.3436C>T	p.R1146C	rs377550597	8.83717e-05	0.00065	0.169596	1	1
ABCC2	10	101595870	G	A	Missense	NM_000392	c.3437G>A	p.R1146H	rs148551677	6.36348e-05	6e-05	0.307658	0	1
ABCC2	10	101595882	G	A	Missense	NM_000392	c.3449G>A	p.R1150H	rs72558200	9.54448e-05	0.00015	0.308216	2	0
ABCC2	10	101595915	C	T	Missense	NM_000392	c.3482C>T	p.S1161F	rs1419843363	3.9763e-06	9e-06	0.478809	1	1
ABCC2	10	101595926	G	A	Missense	NM_000392	c.3493G>A	p.E1165K	rs199938496	1.19287e-05	9.7e-05	0.400383	1	0
ABCC2	10	101595933	T	C	Missense	NM_000392	c.3500T>C	p.V1167A	rs140680467	0.00108879	0.0077	0.123968	6	3
ABCC2	10	101595981	T	C	Missense	NM_000392	c.3548T>C	p.L1183P			0	0.423116	0	1
ABCC2	10	101596016	A	G	Missense	NM_000392	c.3583A>G	p.K1195E	rs1235065840	1.06048e-05	1.8e-05	0.412335	1	0
ABCC2	10	101601738	G	A	Missense	NM_000392	c.3629G>A	p.R1210H	rs778603543	5.16952e-05	0.00021	0.224907	3	1
ABCC2	10	101601744	A	G	Missense	NM_000392	c.3635A>G	p.E1212G			0	0.444001	1	0
ABCC2	10	101604154	G	A	Missense	NM_000392	c.3919G>A	p.V1307M			0	0.186418	1	0
ABCC2	10	101604158	G	T	Missense	NM_000392	c.3923G>T	p.R1308L	rs147177143	2.3861e-05	0	0.444001	0	1
ABCC2	10	101604164	G	A	Missense	NM_000392	c.3929G>A	p.R1310Q	rs369846306	7.95437e-06	6.5e-05	0.171431	1	0
ABCC2	10	101604200	G	A	Missense	NM_000392	c.3965G>A	p.C1322Y			0	0.409192	0	1
ABCC2	10	101604206	T	A	Missense	NM_000392	c.3971T>A	p.I1324N			0	0.492733	1	0
ABCC2	10	101605381	A	T	Missense	NM_000392	c.3988A>T	p.I1330F			0	0.186418	0	1
ABCC2	10	101605433	T	C	Missense	NM_000392	c.4040T>C	p.L1347P	rs373121133	5.3032e-05	1.8e-05	0.544607	1	0
ABCC2	10	101605439	G	C	Missense	NM_000392	c.4046G>C	p.R1349T	rs756482190	3.97627e-06	9e-06	0.485771	1	0
ABCC2	10	101605496	T	C	Missense	NM_000392	c.4103T>C	p.I1368T	rs150575961	0.00015585	0.00058	0.18894	0	2
ABCC2	10	101605531	A	G	Missense	NM_000392	c.4138A>G	p.I1380V			0	0.214265	1	0
ABCC2	10	101606761	C	T	Missense	NM_000392	c.4190C>T	p.P1397L	rs146587077	5.30305e-05	9.8e-05	0.253529	2	2
ABCC2	10	101606778	G	T	Missense	NM_000392	c.4207G>T	p.D1403Y	rs777034549	8.485e-05	0.00042	0.296436	1	0
ABCC2	10	101606781	G	A	Missense	NM_000392	c.4210G>A	p.E1404K	rs1348670639	7.95374e-06	1.8e-05	0.0781733	2	1
ABCC2	10	101606866	A	C	Missense	NM_000392	c.4295A>C	p.E1432A			0	0.283882	1	0
ABCC2	10	101606872	G	A	Missense	NM_000392	c.4301G>A	p.G1434D	rs376276952	7.96077e-06	1.8e-05	0.51676	1	0
ABCC2	10	101610393	G	T	Missense	NM_000392	c.4348G>T	p.A1450S	rs56296335	0.000159104	0.0043	0.0854785	0	0
ABCC2	10	101610541	T	G	Missense	NM_000392	c.4496T>G	p.M1499R	rs762597571	7.95634e-06	3.2e-05	0.27911	0	1
ABCC2	10	101611353	G	C	Missense	NM_000392	c.4603G>C	p.A1535P			0	0.165533	1	0
ABCG2	4	89015796	C	T	Missense	NM_004827	c.1753G>A	p.E585K			9e-06	0.353499	0	1
ABCG2	4	89016695	T	G	Missense	NM_004827	c.1714A>C	p.S572R			0.00021	0.190098	5	2
ABCG2	4	89016744	C	A	Missense	NM_004827	c.1665G>T	p.L555F			9e-06	0.0750307	0	1
ABCG2	4	89018684	A	G	Missense	NM_004827	c.1568T>C	p.M523T			0	0.0889541	0	1
ABCG2	4	89018694	C	G	Missense	NM_004827	c.1558G>C	p.A520P			0	0.332614	1	0
ABCG2	4	89018711	A	T	Missense	NM_004827	c.1541T>A	p.M514K			0	0.144648	0	1
ABCG2	4	89018726	A	G	Missense	NM_004827	c.1526T>C	p.M509T			0	0.158571	1	0
ABCG2	4	89020542	A	G	Missense	NM_004827	c.1426T>C	p.S476P			1.8e-05	0.0920967	1	0
ABCG2	4	89034471	T	C	Missense	NM_004827	c.1178A>G	p.Q393R			9e-06	0.297805	1	2
ABCG2	4	89034501	C	T	Missense	NM_004827	c.1148G>A	p.R383H			0.00016	0.249297	0	1
ABCG2	4	89034526	G	A	Missense	NM_004827	c.1123C>T	p.H375Y			9e-06	0.130724	1	0
ABCG2	4	89036166	C	G	Missense	NM_004827	c.886G>C	p.D296H			5.4e-05	0.230718	0	1
ABCG2	4	89039275	T	C	Missense	NM_004827	c.827A>G	p.Y276C			0	0.256035	0	1
ABCG2	4	89039300	C	T	Missense	NM_004827	c.802G>A	p.G268R			9e-06	0.346537	0	1
ABCG2	4	89039374	T	C	Missense	NM_004827	c.728A>G	p.H243R			2.7e-05	0.281344	1	0
ABCG2	4	89042926	G	A	Missense	NM_004827	c.550C>T	p.R184C			5.8e-05	0.089561	0	0
ABCG2	4	89052266	G	A	Missense	NM_004827	c.478C>T	p.R160W			0.00021	0.231868	0	1
ABCG2	4	89052305	G	A	Missense	NM_004827	c.439C>T	p.R147W			0.00011	0.12701	1	0
ABCG2	4	89052347	T	C	Missense	NM_004827	c.397A>G	p.T133A			0	0.332614	0	1
ABCG2	4	89052351	C	A	Missense	NM_004827	c.393G>T	p.M131I			3.6e-05	0.146279	1	0
ABCG2	4	89053004	C	T	Missense	NM_004827	c.329G>A	p.G110E			2.7e-05	0.434501	0	1
ABCG2	4	89053749	G	A	Missense	NM_004827	c.242C>T	p.P81L			9e-06	0.353499	0	1
ABCG2	4	89053761	G	A	Missense	NM_004827	c.230C>T	p.A77V			0	0.444001	1	0
ABCG2	4	89060951	T	A	Missense	NM_004827	c.197A>T	p.N66I			1.8e-05	0.140829	0	1
ABCG2	4	89061033	A	C	Missense	NM_004827	c.115T>G	p.F39V			0	0.242112	1	0
ADAM29	4	175896987	G	T	Missense	NM_001278125	c.311G>T	p.G104V			0	0.256035	2	0
ADAM29	4	175897670	C	T	Missense	NM_001278125	c.994C>T	p.H332Y			0	0.172495	0	0
ADAM29	4	175897743	T	C	Missense	NM_001278125	c.1067T>C	p.M356T			9.3e-06	0.0959158	1	0
ADAM29	4	175898645	G	A	Missense	NM_001278125	c.1969G>A	p.G657S			3.3e-05	0.0885155	1	0
ADAM29	4	175898655	G	T	Missense	NM_001278125	c.1979G>T	p.G660V			3.2e-05	0.188608	1	0
ADAMTS12	5	33527414	A	G	Missense	NM_030955	c.4664T>C	p.M1555T			0	0.0750307	1	0
ADAMTS12	5	33527462	C	T	Missense	NM_030955	c.4616G>A	p.C1539Y			9e-06	0.31869	1	0
ADAMTS12	5	33549401	A	G	Missense	NM_030955	c.4213T>C	p.C1405R			0	0.325652	1	0
ADAMTS12	5	33549455	G	A	Missense	NM_030955	c.4159C>T	p.R1387C			2.7e-05	0.350961	0	1
ADAMTS12	5	33561263	C	T	Missense	NM_030955	c.3994G>A	p.G1332R			0	0.437039	1	0
ADAMTS12	5	33576162	G	T	Missense	NM_030955	c.3969C>A	p.S1323R			9e-06	0.297805	0	2
ADAMTS12	5	33576658	C	T	Missense	NM_030955	c.3473G>A	p.G1158D			0	0.262997	1	0
ADAMTS12	5	33577232	G	A	Missense	NM_030955	c.2899C>T	p.R967C			4.6e-05	0.337374	0	2
ADAMTS12	5	33577238	G	A	Missense	NM_030955	c.2893C>T	p.R965W			1.8e-05	0.300948	2	1
ADAMTS12	5	33588874	C	T	Missense	NM_030955	c.2695G>A	p.G899R			0	0.402231	1	0
ADAMTS12	5	33614363	C	T	Missense	NM_030955	c.2507G>A	p.C836Y			0	0.569311	1	0
ADAMTS12	5	33615939	C	A	Missense	NM_030955	c.2382G>T	p.W794C			0	0.144648	1	0
ADAMTS12	5	33616034	C	T	Missense	NM_030955	c.2287G>A	p.G763R			3e-05	0.226193	1	0
ADAMTS12	5	33624404	C	T	Missense	NM_030955	c.2075G>A	p.G692D			0	0.395269	1	0
ADAMTS12	5	33624417	C	T	Missense	NM_030955	c.2062G>A	p.E688K			6e-05	0.189309	1	0
ADAMTS12	5	33631009	C	A	Missense	NM_030955	c.1898G>T	p.C633F			6.3e-05	0.290637	1	3
ADAMTS12	5	33637708	T	C	Missense	NM_030955	c.1862A>G	p.Y621C			0	0.200341	1	0
ADAMTS12	5	33637726	G	A	Missense	NM_030955	c.1844C>T	p.P615L			0	0.123763	0	1
ADAMTS12	5	33637798	C	A	Missense	NM_030955	c.1772G>T	p.C591F			0	0.56235	0	1
ADAMTS12	5	33637811	G	A	Missense	NM_030955	c.1759C>T	p.R587C			3e-05	0.149615	1	2
ADAMTS12	5	33637838	C	T	Missense	NM_030955	c.1732G>A	p.G578R			7.2e-05	0.133576	0	1
ADAMTS12	5	33643533	G	C	Missense	NM_030955	c.1522C>G	p.R508G			9e-06	0.325652	0	1
ADAMTS12	5	33643559	A	T	Missense	NM_030955	c.1496T>A	p.L499Q			0.005	0.0778479	44	40
ADAMTS12	5	33648942	G	T	Missense	NM_030955	c.1464C>A	p.F488L			0	0.123763	0	1
ADAMTS12	5	33649671	G	A	Missense	NM_030955	c.1322C>T	p.T441I			4.5e-05	0.102564	1	1
ADAMTS12	5	33649719	T	C	Missense	NM_030955	c.1274A>G	p.Y425C			0	0.200341	1	0
ADAMTS12	5	33649728	T	C	Missense	NM_030955	c.1265A>G	p.Q422R			9e-06	0.186418	1	0
ADAMTS12	5	33658326	G	A	Missense	NM_030955	c.1153C>T	p.P385S			0.00017	0.0789095	3	0
ADAMTS12	5	33658359	G	A	Missense	NM_030955	c.1120C>T	p.R374C			6.5e-05	0.073967	1	0
ADAMTS12	5	33658404	C	T	Missense	NM_030955	c.1075G>A	p.E359K			6.5e-05	0.178393	1	0
ADAMTS12	5	33662086	C	G	Missense	NM_030955	c.975G>C	p.Q325H			8.1e-05	0.185247	2	1
ADAMTS12	5	33683995	A	G	Missense	NM_030955	c.800T>C	p.V267A			0	0.165533	1	0
ADAMTS12	5	33684010	T	C	Missense	NM_030955	c.785A>G	p.H262R			0	0.437039	0	1
ADAMTS12	5	33684067	C	A	Missense	NM_030955	c.728G>T	p.S243I			0	0.339575	1	0
ADAMTS12	5	33684077	G	A	Missense	NM_030955	c.718C>T	p.R240C			0.00013	0.140005	1	0
ADAMTS12	5	33881294	T	C	Missense	NM_030955	c.419A>G	p.H140R			0	0.200341	0	1
ADAMTS12	5	33891846	T	C	Missense	NM_030955	c.116A>G	p.D39G			0	0.0889541	1	0
ADAMTS12	5	33891888	C	A	Missense	NM_030955	c.74G>T	p.C25F			0	0.165533	0	1
ADRA1A	8	26627680	C	T	Missense	NM_000680	c.1387G>A	p.G463R			5.1e-05	0.23701	0	1
ADRA1A	8	26627802	G	T	Missense	NM_000680	c.1265C>A	p.A422D			0	0.31869	0	1
ADRA1A	8	26627925	G	A	Missense	NM_000680	c.1142C>T	p.S381L			0	0.200341	0	1
ADRA1A	8	26628104	G	C	Missense	NM_000680	c.963C>G	p.I321M			0	0.137686	1	0
ADRA1A	8	26721610	G	A	Missense	NM_000680	c.877C>T	p.P293S			0.0002	0.075424	5	3
ADRA1A	8	26721664	C	T	Missense	NM_000680	c.823G>A	p.G275S			4.5e-05	0.255721	1	0
ADRA1A	8	26721690	C	T	Missense	NM_000680	c.797G>A	p.R266Q			0	0.144648	0	1
ADRA1A	8	26721871	G	C	Missense	NM_000680	c.616C>G	p.R206G			0	0.158571	1	0
ADRA1A	8	26721921	G	T	Missense	NM_000680	c.566C>A	p.A189E			8.9e-05	0.237258	1	0
ADRA1A	8	26722005	G	A	Missense	NM_000680	c.482C>T	p.P161L			1.8e-05	0.293986	1	1
ADRA1A	8	26722026	G	A	Missense	NM_000680	c.461C>T	p.S154F			0	0.290843	0	1
ADRA1A	8	26722090	G	T	Missense	NM_000680	c.397C>A	p.R133S			9e-06	0.179456	1	0
ADRA1A	8	26722218	C	A	Missense	NM_000680	c.269G>T	p.G90V			9e-06	0.242112	0	1
ADRA1A	8	26722221	A	C	Missense	NM_000680	c.266T>G	p.L89R			0	0.130724	1	0
ADRA1A	8	26722292	G	C	Missense	NM_000680	c.195C>G	p.I65M			0	0.123763	1	0
ADRA1A	8	26722305	G	A	Missense	NM_000680	c.182C>T	p.T61M			0	0.256035	0	1
ADRA1A	8	26722317	A	G	Missense	NM_000680	c.170T>C	p.L57P			0	0.297805	1	0
ADRA1A	8	26722360	C	G	Missense	NM_000680	c.127G>C	p.G43R			0	0.36046	1	0
ADSSL1/ADSS1	14	105190710	G	A	Missense	NM_152328	c.103G>A	p.V35M			0	0.116801	0	1
ADSSL1/ADSS1	14	105190729	G	C	Missense	NM_152328	c.122G>C	p.W41S			0	0.179456	1	0
ADSSL1/ADSS1	14	105190729	G	T	Missense	NM_152328	c.122G>T	p.W41L			0	0.144648	0	1
ADSSL1/ADSS1	14	105190735	A	G	Missense	NM_152328	c.128A>G	p.D43G			0	0.262997	1	0
ADSSL1/ADSS1	14	105190736	C	G	Missense	NM_152328	c.129C>G	p.D43E			0	0.214265	1	0
ADSSL1/ADSS1	14	105190765	T	C	Missense	NM_152328	c.158T>C	p.L53P			0	0.102878	0	1
ADSSL1/ADSS1	14	105201369	G	A	Missense	NM_152328	c.205G>A	p.A69T			3.6e-05	0.320321	1	0
ADSSL1/ADSS1	14	105201379	C	T	Missense	NM_152328	c.215C>T	p.T72M			0.00029	0.158346	0	1
ADSSL1/ADSS1	14	105201412	A	G	Missense	NM_152328	c.248A>G	p.H83R			4.5e-05	0.179142	1	2
ADSSL1/ADSS1	14	105201421	C	T	Missense	NM_152328	c.257C>T	p.P86L			1.8e-05	0.398411	0	1
ADSSL1/ADSS1	14	105201426	G	A	Missense	NM_152328	c.262G>A	p.G88S			3.3e-05	0.283443	2	0
ADSSL1/ADSS1	14	105204718	G	A	Missense	NM_152328	c.301G>A	p.G101R			5.8e-05	0.242718	1	0
ADSSL1/ADSS1	14	105205703	A	G	Missense	NM_152328	c.397A>G	p.R133G			0	0.23515	1	0
ADSSL1/ADSS1	14	105205709	C	T	Missense	NM_152328	c.403C>T	p.H135Y			0	0.186418	1	0
ADSSL1/ADSS1	14	105206113	G	A	Missense	NM_152328	c.436G>A	p.G146R			0	0.0959158	1	0
ADSSL1/ADSS1	14	105206146	G	A	Missense	NM_152328	c.469G>A	p.G157R			0	0.186418	1	0
ADSSL1/ADSS1	14	105206949	C	A	Missense	NM_152328	c.488C>A	p.T163N			0	0.130724	1	0
ADSSL1/ADSS1	14	105206963	G	A	Missense	NM_152328	c.502G>A	p.G168R			6.5e-05	0.254971	0	1
ADSSL1/ADSS1	14	105207003	G	A	Missense	NM_152328	c.542G>A	p.R181H			0.0002	0.138079	3	1
ADSSL1/ADSS1	14	105207473	G	C	Missense	NM_152328	c.686G>C	p.R229T			9.1e-06	0.19338	1	0
ADSSL1/ADSS1	14	105207556	G	A	Missense	NM_152328	c.769G>A	p.A257T			6.6e-05	0.157077	0	1
ADSSL1/ADSS1	14	105208203	C	T	Missense	NM_152328	c.812C>T	p.T271I			0.00015	0.20379	1	0
ADSSL1/ADSS1	14	105208226	G	A	Missense	NM_152328	c.835G>A	p.G279S			5.8e-05	0.173101	0	1
ADSSL1/ADSS1	14	105208250	C	A	Missense	NM_152328	c.859C>A	p.P287T			1.8e-05	0.238292	1	0
ADSSL1/ADSS1	14	105208280	G	A	Missense	NM_152328	c.889G>A	p.V297M			6.5e-05	0.261933	1	1
ADSSL1/ADSS1	14	105208301	C	T	Missense	NM_152328	c.910C>T	p.R304C			6.5e-05	0.206239	2	1
ADSSL1/ADSS1	14	105208302	G	A	Missense	NM_152328	c.911G>A	p.R304H			0.00028	0.173235	5	2
ADSSL1/ADSS1	14	105208313	G	A	Missense	NM_152328	c.922G>A	p.G308R			0	0.450963	1	0
ADSSL1/ADSS1	14	105208328	G	A	Missense	NM_152328	c.937G>A	p.E313K			0	0.367422	2	0
ADSSL1/ADSS1	14	105208338	A	T	Missense	NM_152328	c.947A>T	p.N316I			9e-06	0.228188	1	0
ADSSL1/ADSS1	14	105209428	C	T	Missense	NM_152328	c.973C>T	p.R325C			7.2e-05	0.105729	1	0
ADSSL1/ADSS1	14	105209467	C	T	Missense	NM_152328	c.1012C>T	p.R338C			5.8e-05	0.228795	1	0
ADSSL1/ADSS1	14	105209468	G	A	Missense	NM_152328	c.1013G>A	p.R338H			2.7e-05	0.316152	0	1
ADSSL1/ADSS1	14	105209473	G	A	Missense	NM_152328	c.1018G>A	p.G340S			1.8e-05	0.412335	1	0
ADSSL1/ADSS1	14	105209507	A	C	Missense	NM_152328	c.1052A>C	p.H351P			0	0.256035	0	1
ADSSL1/ADSS1	14	105211222	G	A	Missense	NM_152328	c.1147G>A	p.G383R			9e-06	0.0819924	0	1
ADSSL1/ADSS1	14	105212599	G	A	Missense	NM_152328	c.1198G>A	p.E400K			6e-05	0.112731	0	1
ADSSL1/ADSS1	14	105212647	G	T	Missense	NM_152328	c.1246G>T	p.A416S			1.8e-05	0.112982	0	2
ADSSL1/ADSS1	14	105212714	G	T	Missense	NM_152328	c.1313G>T	p.G438V			4.5e-05	0.213951	0	1
AKT1	14	105237175	G	A	Missense	NM_005163	c.1270C>T	p.P424S			0	0.172495	1	0
AKT1	14	105239812	C	T	Missense	NM_005163	c.808G>A	p.V270M			0	0.151609	0	1
AKT1	14	105239862	T	C	Missense	NM_005163	c.758A>G	p.Y253C			0	0.242112	0	1
AKT1	14	105239881	C	T	Missense	NM_005163	c.739G>A	p.E247K			0	0.256035	1	0
AKT1	14	105239899	G	A	Missense	NM_005163	c.721C>T	p.R241W			0	0.304767	1	0
AKT1	14	105243057	G	A	Missense	NM_005163	c.226C>T	p.R76C			0	0.31869	0	1
AMFR	16	56396967	G	A	Missense	NM_001144	c.1786C>T	p.R596C			0	0.158571	1	0
AMFR	16	56419833	T	C	Missense	NM_001144	c.1378A>G	p.M460V			9e-06	0.0889541	0	1
AMFR	16	56435667	G	A	Missense	NM_001144	c.1063C>T	p.P355S			0.00026	0.189069	1	0
AMFR	16	56435708	C	A	Missense	NM_001144	c.1022G>T	p.C341F			0	0.583235	1	0
AMFR	16	56436952	G	A	Missense	NM_001144	c.919C>T	p.R307C			3e-05	0.121768	0	1
AMFR	16	56438894	T	C	Missense	NM_001144	c.767A>G	p.Y256C			1.8e-05	0.0990584	1	0
AMFR	16	56439119	A	G	Missense	NM_001144	c.704T>C	p.L235S			6.5e-05	0.073967	1	0
AMFR	16	56443340	T	G	Missense	NM_001144	c.509A>C	p.E170A			7.4e-05	0.153578	2	0
AMFR	16	56443366	C	T	Missense	NM_001144	c.483G>A	p.M161I			0	0.23515	0	1
AMFR	16	56443427	G	A	Missense	NM_001144	c.422C>T	p.T141I			0	0.0819924	0	1
AMFR	16	56448244	T	C	Missense	NM_001144	c.268A>G	p.T90A			0	0.109839	1	0
AMFR	16	56459191	A	C	Missense	NM_001144	c.49T>G	p.Y17D			0	0.130724	0	1
ANKK1	11	113270196	C	A	Missense	NM_178510	c.1505C>A	p.A502D			0	0.249073	1	0
ANKRD53	2	71206831	T	C	Missense	NM_024933	c.458T>C	p.L153P			0	0.249073	1	0
ANKRD53	2	71206915	T	A	Missense	NM_024933	c.542T>A	p.V181D			0	0.179456	1	0
ANKRD53	2	71209112	G	A	Missense	NM_024933	c.664G>A	p.G222S			3.3e-05	0.220788	0	1
ANKRD53	2	71209229	C	T	Missense	NM_024933	c.781C>T	p.R261W			3.8e-05	0.101144	0	2
ARHGEF10L	1	17934318	A	G	Missense	NM_018125	c.455A>G	p.Y152C			0	0.228188	1	0
ARHGEF10L	1	17942662	G	A	Missense	NM_018125	c.800G>A	p.R267H			5.8e-05	0.193987	1	0
ARHGEF10L	1	17948407	T	C	Missense	NM_018125	c.991T>C	p.Y331H			0	0.457924	0	1
ARHGEF10L	1	17948425	C	T	Missense	NM_018125	c.1009C>T	p.R337W			1.8e-05	0.300948	1	1
ARHGEF10L	1	17949539	C	T	Missense	NM_018125	c.1069C>T	p.R357C			1.8e-05	0.0990584	2	0
ARHGEF10L	1	17949579	T	C	Missense	NM_018125	c.1109T>C	p.L370P			0	0.353499	1	0
ARHGEF10L	1	17949641	G	A	Missense	NM_018125	c.1171G>A	p.E391K			5.8e-05	0.20791	0	1
ARHGEF10L	1	17950912	A	C	Missense	NM_018125	c.1231A>C	p.S411R			0	0.179456	0	1
ARHGEF10L	1	17952476	G	A	Missense	NM_018125	c.1343G>A	p.R448H			3e-05	0.184423	0	1
ARHGEF10L	1	17953928	G	A	Missense	NM_018125	c.1514G>A	p.R505Q			5.8e-05	0.159178	1	0
ARHGEF10L	1	17961356	T	G	Missense	NM_018125	c.1772T>G	p.V591G			9e-06	0.172495	0	1
ARHGEF10L	1	17964406	C	T	Missense	NM_018125	c.1951C>T	p.R651C			0.00019	0.0998842	1	0
ARHGEF10L	1	17966701	G	A	Missense	NM_018125	c.2176G>A	p.G726S			0	0.214265	1	1
ARHGEF10L	1	17966707	C	T	Missense	NM_018125	c.2182C>T	p.P728S			9.1e-06	0.186418	1	0
ARHGEF10L	1	17983067	T	G	Missense	NM_018125	c.2724T>G	p.S908R			9e-06	0.0750307	1	0
ARHGEF10L	1	17983174	G	A	Missense	NM_018125	c.2831G>A	p.G944E			0	0.297805	0	1
ARHGEF10L	1	18014144	C	G	Missense	NM_018125	c.3086C>G	p.A1029G			0	0.0750307	1	0
ARHGEF10L	1	18014167	C	T	Missense	NM_018125	c.3109C>T	p.R1037C			0.00012	0.078023	1	1
ARHGEF10L	1	18014168	G	A	Missense	NM_018125	c.3110G>A	p.R1037H			6.5e-05	0.108776	2	0
ARHGEF10L	1	18023762	G	A	Missense	NM_018125	c.3727G>A	p.G1243S			0	0.388307	1	0
ARL14EP	11	30352514	G	T	Missense	NM_152316	c.19G>T	p.V7F			0	0.339575	1	0
ARL14EP	11	30352647	C	T	Missense	NM_152316	c.152C>T	p.S51F			0	0.151609	1	0
ASIP	20	32850641	T	C	Missense	NM_001672	c.164T>C	p.L55P			0	0.221226	0	1
ASIP	20	32856930	T	G	Missense	NM_001672	c.356T>G	p.F119C			4e-05	0.188192	1	0
ATM	11	108098357	T	A	Missense	NM_000051	c.6T>A	p.S2R			0	-0.0293948	1	0
ATM	11	108098395	T	C	Missense	NM_000051	c.44T>C	p.L15P			0	0.339575	1	0
ATM	11	108098508	A	T	Missense	NM_000051	c.78A>T	p.E26D			9e-06	-0.0433182	0	1
ATM	11	108099999	A	G	Missense	NM_000051	c.280A>G	p.M94V			9e-06	0.137686	1	0
ATM	11	108100038	T	C	Missense	NM_000051	c.319T>C	p.C107R			0	-0.00850966	1	0
ATM	11	108106457	C	T	Missense	NM_000051	c.392C>T	p.S131L			0	-0.0224331	1	0
ATM	11	108106499	T	G	Missense	NM_000051	c.434T>G	p.L145R			0	0.395269	1	0
ATM	11	108106548	G	C	Missense	NM_000051	c.483G>C	p.Q161H			0	-0.0433182	1	1
ATM	11	108115544	A	G	Missense	NM_000051	c.692A>G	p.H231R			2.7e-05	-0.0180095	1	0
ATM	11	108115595	G	A	Missense	NM_000051	c.743G>A	p.R248Q			3.2e-05	0.0563357	1	0
ATM	11	108115661	G	A	Missense	NM_000051	c.809G>A	p.R270K			9e-06	-0.0363565	1	0
ATM	11	108115663	C	A	Missense	NM_000051	c.811C>A	p.L271I			9e-06	-0.0502799	1	1
ATM	11	108115718	T	C	Missense	NM_000051	c.866T>C	p.I289T			0	0.0123754	1	0
ATM	11	108117691	G	A	Missense	NM_000051	c.902G>A	p.G301D			0.00012	0.175487	2	2
ATM	11	108117727	A	G	Missense	NM_000051	c.938A>G	p.Y313C			0	-0.00154796	1	0
ATM	11	108117735	T	C	Missense	NM_000051	c.946T>C	p.Y316H			0.00012	0.00840603	1	1
ATM	11	108117798	C	T	Missense	NM_000051	c.1009C>T	p.R337C			0.00018	0.0267863	4	1
ATM	11	108117840	G	A	Missense	NM_000051	c.1051G>A	p.D351N			9e-06	0.0262988	1	0
ATM	11	108119820	T	C	Missense	NM_000051	c.1226T>C	p.L409P			0	0.151609	1	0
ATM	11	108121516	C	T	Missense	NM_000051	c.1324C>T	p.L442F			0	0.123763	0	1
ATM	11	108121708	G	T	Missense	NM_000051	c.1516G>T	p.G506C			8.1e-05	-0.00271931	1	1
ATM	11	108121787	G	A	Missense	NM_000051	c.1595G>A	p.C532Y			0.0008	0.0945458	4	5
ATM	11	108122590	C	T	Missense	NM_000051	c.1634C>T	p.A545V			1.8e-05	0.0433648	1	0
ATM	11	108122683	T	C	Missense	NM_000051	c.1727T>C	p.I576T			0.00013	0.146967	1	2
ATM	11	108123582	G	C	Missense	NM_000051	c.1841G>C	p.S614T			1.8e-05	0.0503265	1	1
ATM	11	108123621	T	G	Missense	NM_000051	c.1880T>G	p.F627C			2.7e-05	0.128186	0	1
ATM	11	108124606	C	A	Missense	NM_000051	c.1964C>A	p.T655K			0	0.123763	1	0
ATM	11	108126984	G	A	Missense	NM_000051	c.2167G>A	p.V723M			0	0.0193371	1	0
ATM	11	108127006	G	A	Missense	NM_000051	c.2189G>A	p.C730Y			0	0.109839	1	0
ATM	11	108128217	C	A	Missense	NM_000051	c.2260C>A	p.Q754K			0	0.0541456	0	1
ATM	11	108128226	G	A	Missense	NM_000051	c.2269G>A	p.G757R			2.7e-05	0.316152	1	1
ATM	11	108129750	G	A	Missense	NM_000051	c.2414G>A	p.R805Q			0.00016	0.0195605	0	1
ATM	11	108129754	G	T	Missense	NM_000051	c.2418G>T	p.L806F			1.8e-05	0.0364031	1	1
ATM	11	108139197	T	C	Missense	NM_000051	c.2699T>C	p.M900T			0	0.0471839	0	1
ATM	11	108139221	T	C	Missense	NM_000051	c.2723T>C	p.V908A			0	-0.0224331	0	1
ATM	11	108139268	C	T	Missense	NM_000051	c.2770C>T	p.R924W			0.00012	0.154602	1	1
ATM	11	108139269	G	A	Missense	NM_000051	c.2771G>A	p.R924Q			0.00039	0.0150515	1	0
ATM	11	108141846	A	T	Missense	NM_000051	c.2894A>T	p.D965V			9e-06	0.0889541	1	0
ATM	11	108141988	T	C	Missense	NM_000051	c.2932T>C	p.S978P			0.005	0.0639245	11	5
ATM	11	108142000	C	T	Missense	NM_000051	c.2944C>T	p.R982C			6.5e-05	0.213201	1	0
ATM	11	108142010	A	G	Missense	NM_000051	c.2954A>G	p.D985G			3e-05	0.0312658	1	0
ATM	11	108143318	T	C	Missense	NM_000051	c.3137T>C	p.L1046P			0	0.325652	1	0
ATM	11	108143552	G	A	Missense	NM_000051	c.3257G>A	p.R1086H			9.7e-05	-0.0451658	2	0
ATM	11	108150261	G	A	Missense	NM_000051	c.3328G>A	p.A1110T			1.8e-05	-0.0332139	1	0
ATM	11	108150265	T	C	Missense	NM_000051	c.3332T>C	p.L1111P			0	0.23515	0	1
ATM	11	108150295	A	G	Missense	NM_000051	c.3362A>G	p.E1121G			0	0.0471839	0	1
ATM	11	108150304	A	T	Missense	NM_000051	c.3371A>T	p.Y1124F			3e-05	0.0173424	0	1
ATM	11	108150322	G	A	Missense	NM_000051	c.3389G>A	p.G1130E			0	0.353499	1	0
ATM	11	108151845	C	G	Missense	NM_000051	c.3526C>G	p.L1176V			0	-0.00154796	1	0
ATM	11	108153437	G	A	Missense	NM_000051	c.3577G>A	p.V1193I			3.6e-05	-0.0416871	1	0
ATM	11	108154994	A	T	Missense	NM_000051	c.3787A>T	p.S1263C			0	-0.0293948	1	0
ATM	11	108155000	T	G	Missense	NM_000051	c.3793T>G	p.F1265V			0	0.214265	1	0
ATM	11	108155007	A	T	Missense	NM_000051	c.3800A>T	p.E1267V			9e-06	0.0332605	1	1
ATM	11	108155013	A	G	Missense	NM_000051	c.3806A>G	p.K1269R			6.5e-05	-0.0234968	0	1
ATM	11	108155064	G	T	Missense	NM_000051	c.3857G>T	p.C1286F			9e-06	0.346537	1	0
ATM	11	108155093	C	T	Missense	NM_000051	c.3886C>T	p.P1296S			0	0.374384	1	0
ATM	11	108158382	C	T	Missense	NM_000051	c.4049C>T	p.T1350M			0.00035	0.117589	0	1
ATM	11	108158424	A	G	Missense	NM_000051	c.4091A>G	p.D1364G			3e-05	-0.0244278	1	0
ATM	11	108159742	C	T	Missense	NM_000051	c.4148C>T	p.S1383L			6.3e-05	0.269752	1	0
ATM	11	108160339	A	G	Missense	NM_000051	c.4247A>G	p.Q1416R			3.6e-05	0.0279299	0	1
ATM	11	108160396	A	C	Missense	NM_000051	c.4304A>C	p.K1435T			3.3e-05	-0.00198655	1	0
ATM	11	108160407	C	T	Missense	NM_000051	c.4315C>T	p.L1439F			0	-0.0154714	0	1
ATM	11	108160416	T	C	Missense	NM_000051	c.4324T>C	p.Y1442H			0.0013	0.10673	8	11
ATM	11	108160426	T	G	Missense	NM_000051	c.4334T>G	p.F1445C			0	0.444001	1	0
ATM	11	108160467	G	A	Missense	NM_000051	c.4375G>A	p.G1459R			9.9e-05	0.231982	0	1
ATM	11	108160480	T	G	Missense	NM_000051	c.4388T>G	p.F1463C			0.001	0.0898925	6	6
ATM	11	108160512	C	G	Missense	NM_000051	c.4420C>G	p.H1474D			1.8e-05	0.342718	1	0
ATM	11	108160518	A	G	Missense	NM_000051	c.4426A>G	p.I1476V			0	-0.0363565	0	1
ATM	11	108163348	C	T	Missense	NM_000051	c.4439C>T	p.P1480L			1.8e-05	-0.0332139	1	0
ATM	11	108163375	G	T	Missense	NM_000051	c.4466G>T	p.R1489L			1.8e-05	0.238292	1	0
ATM	11	108163377	A	G	Missense	NM_000051	c.4468A>G	p.S1490G			2.7e-05	-0.0110478	1	0
ATM	11	108163414	G	T	Missense	NM_000051	c.4505G>T	p.C1502F			0	0.367422	1	0
ATM	11	108163476	A	G	Missense	NM_000051	c.4567A>G	p.T1523A			0	0.0889541	0	1
ATM	11	108164051	G	C	Missense	NM_000051	c.4623G>C	p.L1541F			0	0.27692	0	1
ATM	11	108164068	T	C	Missense	NM_000051	c.4640T>C	p.I1547T			0	0.200341	1	0
ATM	11	108164080	A	G	Missense	NM_000051	c.4652A>G	p.D1551G			0	0.137686	1	0
ATM	11	108164196	C	T	Missense	NM_000051	c.4768C>T	p.L1590F			0.0011	0.0161631	1	3
ATM	11	108168067	T	C	Missense	NM_000051	c.4963T>C	p.S1655P			9e-06	0.0541456	0	1
ATM	11	108170479	G	C	Missense	NM_000051	c.5044G>C	p.D1682H			0	0.144648	0	0
ATM	11	108170491	A	G	Missense	NM_000051	c.5056A>G	p.I1686V			2.7e-05	-0.0458563	1	0
ATM	11	108170546	A	G	Missense	NM_000051	c.5111A>G	p.E1704G			0	0.283882	1	0
ATM	11	108172455	A	G	Missense	NM_000051	c.5258A>G	p.Y1753C			0	0.00541374	1	0
ATM	11	108172459	G	T	Missense	NM_000051	c.5262G>T	p.K1754N			2.7e-05	0.00983728	1	1
ATM	11	108172475	A	G	Missense	NM_000051	c.5278A>G	p.M1760V			2.7e-05	0.0446458	1	2
ATM	11	108172500	G	A	Missense	NM_000051	c.5303G>A	p.R1768K			0	0.151609	2	1
ATM	11	108172503	C	A	Missense	NM_000051	c.5306C>A	p.T1769K			0	0.0819924	4	2
ATM	11	108172503	C	T	Missense	NM_000051	c.5306C>T	p.T1769I			0	0.0611073	0	1
ATM	11	108173677	T	C	Missense	NM_000051	c.5417T>C	p.I1806T			0	0.221226	0	1
ATM	11	108178654	A	G	Missense	NM_000051	c.5705A>G	p.D1902G			0	0.158571	1	0
ATM	11	108178702	G	C	Missense	NM_000051	c.5753G>C	p.R1918T			0.00011	0.0156231	1	1
ATM	11	108180901	C	T	Missense	NM_000051	c.5777C>T	p.T1926I			0	0.36046	1	0
ATM	11	108180945	G	C	Missense	NM_000051	c.5821G>C	p.V1941L			0.00024	0.163105	3	2
ATM	11	108180975	C	G	Missense	NM_000051	c.5851C>G	p.H1951D			0	0.388307	0	1
ATM	11	108180977	C	A	Missense	NM_000051	c.5853C>A	p.H1951Q			0	0.346537	0	0
ATM	11	108183212	G	T	Missense	NM_000051	c.5993G>T	p.G1998V			0	-0.0502799	1	0
ATM	11	108186563	A	G	Missense	NM_000051	c.6020A>G	p.E2007G			9e-06	0.0402222	1	0
ATM	11	108186599	A	G	Missense	NM_000051	c.6056A>G	p.Y2019C			0	0.262997	1	0
ATM	11	108186740	T	C	Missense	NM_000051	c.6098T>C	p.L2033P			0	0.0402222	0	0
ATM	11	108186757	G	A	Missense	NM_000051	c.6115G>A	p.E2039K			3.2e-05	0.160761	1	0
ATM	11	108186785	C	A	Missense	NM_000051	c.6143C>A	p.T2048K			0	0.0402222	1	0
ATM	11	108186796	G	A	Missense	NM_000051	c.6154G>A	p.E2052K			0.00039	-0.284302	1	0
ATM	11	108186820	C	T	Missense	NM_000051	c.6178C>T	p.R2060C			6.5e-05	0.0391585	1	0
ATM	11	108186830	G	A	Missense	NM_000051	c.6188G>A	p.G2063E			0	0.228188	1	0
ATM	11	108188131	T	C	Missense	NM_000051	c.6230T>C	p.L2077P			0	0.242112	0	1
ATM	11	108188224	A	G	Missense	NM_000051	c.6323A>G	p.Q2108R			4.5e-05	0.255721	1	1
ATM	11	108190749	A	C	Missense	NM_000051	c.6416A>C	p.E2139A			0	0.23515	0	1
ATM	11	108192078	C	T	Missense	NM_000051	c.6503C>T	p.S2168L			0.0007	0.0681289	1	0
ATM	11	108192086	C	G	Missense	NM_000051	c.6511C>G	p.P2171A			0	0.283882	1	0
ATM	11	108192111	T	C	Missense	NM_000051	c.6536T>C	p.I2179T			9e-06	0.36046	1	0
ATM	11	108196068	T	G	Missense	NM_000051	c.6604T>G	p.Y2202D			6.5e-05	0.213201	1	0
ATM	11	108196137	G	A	Missense	NM_000051	c.6673G>A	p.A2225T			0	0.123763	1	0
ATM	11	108196797	G	A	Missense	NM_000051	c.6820G>A	p.A2274T			0.00022	-0.00860926	3	2
ATM	11	108196809	A	G	Missense	NM_000051	c.6832A>G	p.I2278V			0	0.0332605	0	1
ATM	11	108196896	C	T	Missense	NM_000051	c.6919C>T	p.L2307F			0.00025	-0.046684	24	4
ATM	11	108198409	T	C	Missense	NM_000051	c.7013T>C	p.L2338P			0	0.381346	1	0
ATM	11	108198433	C	T	Missense	NM_000051	c.7037C>T	p.A2346V			0	0.388307	1	0
ATM	11	108199824	C	T	Missense	NM_000051	c.7166C>T	p.S2389L			0	0.31869	1	0
ATM	11	108199875	A	G	Missense	NM_000051	c.7217A>G	p.K2406R			9e-06	-0.0363565	0	1
ATM	11	108199929	T	G	Missense	NM_000051	c.7271T>G	p.V2424G			9e-05	0.257676	3	1
ATM	11	108200941	A	C	Missense	NM_000051	c.7308A>C	p.R2436S			0	0.409192	1	0
ATM	11	108200975	G	A	Missense	NM_000051	c.7342G>A	p.D2448N			0	0.0611073	1	0
ATM	11	108200979	A	C	Missense	NM_000051	c.7346A>C	p.E2449A			0	0.109839	0	1
ATM	11	108200987	C	G	Missense	NM_000051	c.7354C>G	p.L2452V			1.8e-05	-0.0332139	0	1
ATM	11	108201008	C	T	Missense	NM_000051	c.7375C>T	p.R2459C			0.00012	0.196372	1	0
ATM	11	108201050	T	C	Missense	NM_000051	c.7417T>C	p.C2473R			0	0.36046	0	0
ATM	11	108201057	T	C	Missense	NM_000051	c.7424T>C	p.L2475S			9e-06	0.0541456	0	1
ATM	11	108201108	T	G	Missense	NM_000051	c.7475T>G	p.L2492R			0.00053	0.176018	9	6
ATM	11	108202634	C	A	Missense	NM_000051	c.7658C>A	p.P2553H			0	0.416154	0	1
ATM	11	108203493	G	A	Missense	NM_000051	c.7793G>A	p.R2598Q			6.6e-05	0.177962	1	0
ATM	11	108203565	C	G	Missense	NM_000051	c.7865C>G	p.A2622G			1.8e-05	-0.0471373	2	2
ATM	11	108203575	T	G	Missense	NM_000051	c.7875T>G	p.D2625E			9e-06	0.068069	5	1
ATM	11	108203576	G	C	Missense	NM_000051	c.7876G>C	p.A2626P			9e-06	0.346537	5	1
ATM	11	108203612	T	G	Missense	NM_000051	c.7912T>G	p.W2638G			0.00023	0.122267	0	0
ATM	11	108204681	A	G	Missense	NM_000051	c.7996A>G	p.T2666A			1.8e-05	0.300948	1	0
ATM	11	108204684	A	G	Missense	NM_000051	c.7999A>G	p.M2667V			2.7e-05	0.0376841	1	0
ATM	11	108205700	A	C	Missense	NM_000051	c.8015A>C	p.D2672A			9e-06	0.437039	0	1
ATM	11	108205756	C	T	Missense	NM_000051	c.8071C>T	p.R2691C			0.00064	0.0589956	0	0
ATM	11	108205769	G	A	Missense	NM_000051	c.8084G>A	p.G2695D			0	0.541465	1	0
ATM	11	108205805	C	G	Missense	NM_000051	c.8120C>G	p.S2707C			0.00023	0.275424	0	0
ATM	11	108205832	T	C	Missense	NM_000051	c.8147T>C	p.V2716A			5.4e-05	0.335144	1	1
ATM	11	108206575	C	T	Missense	NM_000051	c.8155C>T	p.R2719C			1.8e-05	0.0920967	3	5
ATM	11	108206576	G	A	Missense	NM_000051	c.8156G>A	p.R2719H			0.00051	-0.0506621	1	3
ATM	11	108206686	A	G	Missense	NM_000051	c.8266A>G	p.K2756E			0	0.416154	1	0
ATM	11	108213950	T	G	Missense	NM_000051	c.8270T>G	p.V2757G			0	0.478809	2	0
ATM	11	108213973	G	A	Missense	NM_000051	c.8293G>A	p.G2765S			1.8e-05	0.454105	1	0
ATM	11	108214004	C	T	Missense	NM_000051	c.8324C>T	p.P2775L			0	0.444001	0	1
ATM	11	108214073	C	A	Missense	NM_000051	c.8393C>A	p.A2798D			0	0.0123754	2	0
ATM	11	108216545	C	T	Missense	NM_000051	c.8494C>T	p.R2832C			0.00013	0.237469	3	0
ATM	11	108216597	G	A	Missense	NM_000051	c.8546G>A	p.R2849Q			9.7e-05	0.302919	1	0
ATM	11	108216611	C	T	Missense	NM_000051	c.8560C>T	p.R2854C			0.00048	0.197452	2	0
ATM	11	108218045	A	C	Missense	NM_000051	c.8624A>C	p.N2875T			0	0.36046	1	0
ATM	11	108218080	C	G	Missense	NM_000051	c.8659C>G	p.H2887D			0	0.471848	2	0
ATM	11	108218087	A	G	Missense	NM_000051	c.8666A>G	p.D2889G			0	0.56235	1	0
ATM	11	108224513	A	G	Missense	NM_000051	c.8692A>G	p.K2898E			0	0.228188	1	0
ATM	11	108224538	T	C	Missense	NM_000051	c.8717T>C	p.V2906A			9e-06	0.402231	0	1
ATM	11	108224546	A	G	Missense	NM_000051	c.8725A>G	p.R2909G			0	0.437039	1	0
ATM	11	108224555	A	G	Missense	NM_000051	c.8734A>G	p.R2912G			0.00045	0.1948	6	4
ATM	11	108236094	A	T	Missense	NM_000051	c.9030A>T	p.L3010F			0	0.165533	1	0
ATM	11	108236111	A	T	Missense	NM_000051	c.9047A>T	p.K3016I			0	0.242112	0	1
ATM	11	108236191	A	G	Missense	NM_000051	c.9127A>G	p.K3043E			0	0.0889541	1	0
ATM	11	108236192	A	G	Missense	NM_000051	c.9128A>G	p.K3043R			0	-0.0502799	2	0
ATM	11	108236219	G	C	Missense	NM_000051	c.9155G>C	p.W3052S			0	0.597158	0	1
ATP2A1	16	28890036	A	G	Missense	NM_004320	c.44A>G	p.Y15C			3.3e-05	0.185979	1	0
ATP2A1	16	28890036	A	C	Missense	NM_004320	c.44A>C	p.Y15S			0	0.179456	1	0
ATP2A1	16	28890050	G	A	Missense	NM_004320	c.58G>A	p.E20K			2.7e-05	0.246535	0	1
ATP2A1	16	28890090	T	A	Missense	NM_004320	c.98T>A	p.L33Q			9e-06	0.0819924	0	1
ATP2A1	16	28890101	G	A	Missense	NM_004320	c.109G>A	p.G37S			0.00015	0.468335	1	1
ATP2A1	16	28890420	A	G	Missense	NM_004320	c.119A>G	p.E40G			0	0.249073	1	0
ATP2A1	16	28892267	C	T	Missense	NM_004320	c.251C>T	p.T84I			0.00012	0.078023	1	0
ATP2A1	16	28892288	C	T	Missense	NM_004320	c.272C>T	p.P91L			0	0.457924	0	1
ATP2A1	16	28893775	C	T	Missense	NM_004320	c.328C>T	p.R110W			7.2e-05	0.251925	6	1
ATP2A1	16	28893781	G	A	Missense	NM_004320	c.334G>A	p.A112T			0	0.297805	0	1
ATP2A1	16	28893866	T	G	Missense	NM_004320	c.419T>G	p.I140S			0	0.52058	0	1
ATP2A1	16	28895904	A	G	Missense	NM_004320	c.472A>G	p.K158E			9e-06	0.450963	1	0
ATP2A1	16	28895959	A	G	Missense	NM_004320	c.527A>G	p.D176G			0	0.527541	0	1
ATP2A1	16	28898519	T	C	Missense	NM_004320	c.554T>C	p.V185A			9e-06	0.27692	1	2
ATP2A1	16	28898537	C	T	Missense	NM_004320	c.572C>T	p.T191M			0.00026	0.0985667	0	1
ATP2A1	16	28898545	G	T	Missense	NM_004320	c.580G>T	p.V194F			1.8e-05	0.182599	1	1
ATP2A1	16	28898551	G	C	Missense	NM_004320	c.586G>C	p.D196H			0	0.346537	0	1
ATP2A1	16	28898581	A	G	Missense	NM_004320	c.616A>G	p.N206D			0	0.151609	1	0
ATP2A1	16	28898757	T	G	Missense	NM_004320	c.642T>G	p.I214M			0	0.19338	1	0
ATP2A1	16	28898776	G	A	Missense	NM_004320	c.661G>A	p.G221S			0	0.395269	0	1
ATP2A1	16	28898794	G	A	Missense	NM_004320	c.679G>A	p.G227S			3.2e-05	0.460114	0	1
ATP2A1	16	28898846	A	G	Missense	NM_004320	c.731A>G	p.Q244R			0	0.23515	0	1
ATP2A1	16	28898884	G	A	Missense	NM_004320	c.769G>A	p.G257R			0	0.464886	0	1
ATP2A1	16	28898975	C	T	Missense	NM_004320	c.860C>T	p.S287F			9e-06	0.416154	0	1
ATP2A1	16	28898983	C	T	Missense	NM_004320	c.868C>T	p.R290C			0.00012	0.238142	0	1
ATP2A1	16	28898986	G	A	Missense	NM_004320	c.871G>A	p.G291R			3.2e-05	0.369612	0	1
ATP2A1	16	28899040	G	A	Missense	NM_004320	c.925G>A	p.E309K			6.5e-05	0.380282	0	1
ATP2A1	16	28900150	G	A	Missense	NM_004320	c.971G>A	p.R324H			5.8e-05	0.270565	3	0
ATP2A1	16	28900152	C	T	Missense	NM_004320	c.973C>T	p.R325W			5.8e-05	0.340182	1	0
ATP2A1	16	28900153	G	A	Missense	NM_004320	c.974G>A	p.R325Q			5.8e-05	0.319297	1	1
ATP2A1	16	28900194	G	A	Missense	NM_004320	c.1015G>A	p.V339I			9e-06	0.123763	0	1
ATP2A1	16	28905543	C	T	Missense	NM_004320	c.1163C>T	p.T388I			0	0.0889541	0	1
ATP2A1	16	28905872	G	A	Missense	NM_004320	c.1231G>A	p.V411M			0	0.19338	1	0
ATP2A1	16	28906152	G	T	Missense	NM_004320	c.1297G>T	p.V433F			0	0.137686	1	0
ATP2A1	16	28906155	T	C	Missense	NM_004320	c.1300T>C	p.Y434H			0	0.249073	2	0
ATP2A1	16	28906224	A	G	Missense	NM_004320	c.1369A>G	p.T457A			1.8e-05	0.0990584	1	1
ATP2A1	16	28906239	C	G	Missense	NM_004320	c.1384C>G	p.L462V			5.8e-05	0.145255	0	1
ATP2A1	16	28906240	T	C	Missense	NM_004320	c.1385T>C	p.L462P			5.8e-05	0.395876	0	1
ATP2A1	16	28909324	A	T	Missense	NM_004320	c.1423A>T	p.I475F			5.4e-05	0.0845224	2	2
ATP2A1	16	28909343	A	T	Missense	NM_004320	c.1442A>T	p.K481M			0	0.402231	0	1
ATP2A1	16	28909367	G	A	Missense	NM_004320	c.1466G>A	p.R489Q			1.8e-05	0.356641	0	1
ATP2A1	16	28909382	T	C	Missense	NM_004320	c.1481T>C	p.M494T			0	0.478809	1	0
ATP2A1	16	28909558	C	T	Missense	NM_004320	c.1550C>T	p.A517V			0	0.541465	0	1
ATP2A1	16	28909579	G	A	Missense	NM_004320	c.1571G>A	p.R524H			4.5e-05	0.346223	0	1
ATP2A1	16	28909611	G	A	Missense	NM_004320	c.1603G>A	p.V535M			9e-06	0.0889541	1	0
ATP2A1	16	28909614	C	T	Missense	NM_004320	c.1606C>T	p.P536S			0	0.221226	2	0
ATP2A1	16	28909686	C	T	Missense	NM_004320	c.1678C>T	p.R560C			6.3e-05	0.408986	0	1
ATP2A1	16	28909707	C	G	Missense	NM_004320	c.1699C>G	p.R567G			0	0.332614	0	1
ATP2A1	16	28909708	G	A	Missense	NM_004320	c.1700G>A	p.R567Q			0.00012	0.10587	1	0
ATP2A1	16	28911981	G	A	Missense	NM_004320	c.1844G>A	p.R615H			0.00017	0.141565	1	0
ATP2A1	16	28911989	G	A	Missense	NM_004320	c.1852G>A	p.G618R			0.00052	0.344636	1	0
ATP2A1	16	28912046	C	T	Missense	NM_004320	c.1909C>T	p.R637W			2.7e-05	0.330075	0	2
ATP2A1	16	28912047	G	A	Missense	NM_004320	c.1910G>A	p.R637Q			5.8e-05	0.103484	1	2
ATP2A1	16	28912053	T	C	Missense	NM_004320	c.1916T>C	p.I639T			6.5e-05	0.422052	0	1
ATP2A1	16	28912073	G	A	Missense	NM_004320	c.1936G>A	p.E646K			4.5e-05	0.193066	1	0
ATP2A1	16	28912091	G	A	Missense	NM_004320	c.1954G>A	p.A652T			0	0.374384	1	0
ATP2A1	16	28912187	A	G	Missense	NM_004320	c.2050A>G	p.K684E			0	0.576273	0	1
ATP2A1	16	28912187	A	C	Missense	NM_004320	c.2050A>C	p.K684Q			0	0.576273	1	0
ATP2A1	16	28912197	T	C	Missense	NM_004320	c.2060T>C	p.I687T			3e-05	0.504661	0	1
ATP2A1	16	28912212	A	G	Missense	NM_004320	c.2075A>G	p.Q692R			5.8e-05	0.381952	0	0
ATP2A1	16	28912228	C	G	Missense	NM_004320	c.2091C>G	p.I697M			9.2e-06	0.457924	1	0
ATP2A1	16	28913259	G	A	Missense	NM_004320	c.2176G>A	p.V726M			5.8e-05	0.395876	1	1
ATP2A1	16	28913313	G	A	Missense	NM_004320	c.2230G>A	p.V744I			0	0.23515	1	1
ATP2A1	16	28913383	C	T	Missense	NM_004320	c.2300C>T	p.S767F			0	0.576273	0	1
ATP2A1	16	28913518	G	A	Missense	NM_004320	c.2335G>A	p.A779T			0	0.311729	1	0
ATP2A1	16	28913521	G	A	Missense	NM_004320	c.2338G>A	p.A780T			0	0.325652	0	1
ATP2A1	16	28913549	C	T	Missense	NM_004320	c.2366C>T	p.P789L			1.8e-05	0.572454	0	2
ATP2A1	16	28913614	C	A	Missense	NM_004320	c.2431C>A	p.P811T			0	0.395269	0	1
ATP2A1	16	28913624	T	C	Missense	NM_004320	c.2441T>C	p.L814P			0.00015	0.196829	1	0
ATP2A1	16	28913642	C	G	Missense	NM_004320	c.2459C>G	p.P820R			0	0.186418	0	1
ATP2A1	16	28913645	C	T	Missense	NM_004320	c.2462C>T	p.P821L			0	0.478809	0	1
ATP2A1	16	28913647	C	T	Missense	NM_004320	c.2464C>T	p.R822W			6.5e-05	0.261933	1	0
ATP2A1	16	28913690	G	A	Missense	NM_004320	c.2507G>A	p.R836H			6.5e-05	0.310665	0	1
ATP2A1	16	28913913	C	A	Missense	NM_004320	c.2537C>A	p.A846E			0	0.506656	1	0
ATP2A1	16	28913934	C	T	Missense	NM_004320	c.2558C>T	p.A853V			9e-06	0.200341	1	0
ATP2A1	16	28913936	T	C	Missense	NM_004320	c.2560T>C	p.W854R			0.00036	0.339214	2	0
ATP2A1	16	28914109	T	C	Missense	NM_004320	c.2621T>C	p.M874T			2.7e-05	0.330075	1	1
ATP2A1	16	28914137	T	G	Missense	NM_004320	c.2649T>G	p.F883L			0	0.172495	1	0
ATP2A1	16	28914193	C	T	Missense	NM_004320	c.2705C>T	p.S902F			0	0.555388	0	1
ATP2A1	16	28914358	G	A	Missense	NM_004320	c.2752G>A	p.E918K			6.5e-05	0.338512	1	0
ATP2A1	16	28914377	G	A	Missense	NM_004320	c.2771G>A	p.R924Q			5.8e-05	0.193987	1	0
ATP2A1	16	28914407	T	C	Missense	NM_004320	c.2801T>C	p.L934P			0	0.471848	1	0
ATP2A1	16	28914416	T	C	Missense	NM_004320	c.2810T>C	p.I937T			0	0.311729	0	1
ATP2A1	16	28914714	T	C	Missense	NM_004320	c.2933T>C	p.I978T			0.00024	0.246646	1	0
ATP2C1	3	130613617	A	G	Missense	NM_001001486	c.4A>G	p.K2E			0	0.27692	1	0
ATP2C1	3	130649281	C	T	Missense	NM_001001486	c.28C>T	p.P10S			1.8e-05	0.112982	1	0
ATP2C1	3	130650908	A	G	Missense	NM_001001486	c.160A>G	p.R54G			0	0.402231	1	0
ATP2C1	3	130660524	C	T	Missense	NM_001001486	c.512C>T	p.A171V			0	0.499694	0	1
ATP2C1	3	130672768	C	T	Missense	NM_001001486	c.635C>T	p.S212L			0.00015	0.210752	0	1
ATP2C1	3	130672770	A	G	Missense	NM_001001486	c.637A>G	p.R213G			0.00021	0.0787111	0	1
ATP2C1	3	130682921	C	T	Missense	NM_001001486	c.1006C>T	p.P336S			4.5e-05	0.227874	1	1
ATP2C1	3	130686004	T	A	Missense	NM_001001486	c.1138T>A	p.Y380N			0.00012	0.314721	1	0
ATP2C1	3	130686005	A	G	Missense	NM_001001486	c.1139A>G	p.Y380C			0.00017	0.336492	1	0
ATP2C1	3	130686195	G	A	Missense	NM_001001486	c.1240G>A	p.A414T			4.5e-05	0.123449	0	1
ATP2C1	3	130688155	A	G	Missense	NM_001001486	c.1328A>G	p.Q443R			1.8e-05	0.112982	1	0
ATP2C1	3	130694177	A	G	Missense	NM_001001486	c.1415A>G	p.D472G			0	0.402231	0	1
ATP2C1	3	130694212	G	A	Missense	NM_001001486	c.1450G>A	p.E484K			9e-06	0.541465	0	1
ATP2C1	3	130694237	C	T	Missense	NM_001001486	c.1475C>T	p.T492I			9e-06	0.144648	0	1
ATP2C1	3	130694245	A	G	Missense	NM_001001486	c.1483A>G	p.S495G			9e-06	0.151609	1	1
ATP2C1	3	130694299	G	A	Missense	NM_001001486	c.1537G>A	p.E513K			0	0.179456	0	1
ATP2C1	3	130698154	C	G	Missense	NM_001001486	c.1632C>G	p.I544M			1.8e-05	0.0990584	2	0
ATP2C1	3	130698195	C	T	Missense	NM_001001486	c.1673C>T	p.T558I			0	0.102878	1	0
ATP2C1	3	130698242	C	G	Missense	NM_001001486	c.1720C>G	p.Q574E			0	0.123763	0	1
ATP2C1	3	130699450	A	G	Missense	NM_001001486	c.1766A>G	p.K589R			9e-06	0.262997	1	1
ATP2C1	3	130712824	A	C	Missense	NM_001001486	c.1939A>C	p.N647H			0	0.367422	0	1
ATP2C1	3	130712839	C	A	Missense	NM_001001486	c.1954C>A	p.L652M			0	0.506656	1	0
ATP2C1	3	130712870	G	C	Missense	NM_001001486	c.1985G>C	p.G662A			0	0.583235	0	1
ATP2C1	3	130712879	G	C	Missense	NM_001001486	c.1994G>C	p.G665A			0	0.555388	0	1
ATP2C1	3	130712936	C	G	Missense	NM_001001486	c.2051C>G	p.T684S			0	0.31869	0	1
ATP2C1	3	130712938	A	G	Missense	NM_001001486	c.2053A>G	p.I685V			9e-06	0.221226	1	0
ATP2C1	3	130714903	G	A	Missense	NM_001001486	c.2074G>A	p.G692S			0	0.555388	0	1
ATP2C1	3	130715565	T	A	Missense	NM_001001486	c.2168T>A	p.M723K			0	0.527541	1	0
ATP2C1	3	130715582	C	G	Missense	NM_001001486	c.2185C>G	p.L729V			8.9e-05	0.425224	2	2
ATP2C1	3	130716583	G	A	Missense	NM_001001486	c.2377G>A	p.V793I			0	0.221226	1	0
ATP2C1	3	130717148	A	G	Missense	NM_001001486	c.2402A>G	p.N801S			0	0.0959158	1	0
ATP2C1	3	130717174	A	G	Missense	NM_001001486	c.2428A>G	p.M810V			3.2e-05	0.306957	0	1
ATP2C1	3	130718462	C	T	Missense	NM_001001486	c.2588C>T	p.P863L			9e-06	0.395269	1	0
ATR	3	142168332	T	C	Missense	NM_001184	c.7874A>G	p.Q2625R			0	0.186418	0	1
ATR	3	142176507	A	G	Missense	NM_001184	c.7594T>C	p.F2532L			0	0.444001	1	0
ATR	3	142177876	C	T	Missense	NM_001184	c.7427G>A	p.R2476H			6.5e-05	0.456861	1	0
ATR	3	142178108	T	C	Missense	NM_001184	c.7310A>G	p.H2437R			9e-06	0.151609	1	0
ATR	3	142188288	C	T	Missense	NM_001184	c.6443G>A	p.R2148Q			3.2e-05	0.188608	0	1
ATR	3	142188979	T	C	Missense	NM_001184	c.6268A>G	p.M2090V			0	0.158571	0	1
ATR	3	142188988	T	C	Missense	NM_001184	c.6259A>G	p.M2087V			3.3e-05	0.0745921	0	1
ATR	3	142189021	G	C	Missense	NM_001184	c.6226C>G	p.L2076V			0.00024	0.10045	4	5
ATR	3	142204067	A	G	Missense	NM_001184	c.6136T>C	p.Y2046H			0	0.137686	2	0
ATR	3	142211984	T	A	Missense	NM_001184	c.6068A>T	p.K2023I			0	0.158571	0	1
ATR	3	142212003	C	T	Missense	NM_001184	c.6049G>A	p.E2017K			0	0.339575	0	1
ATR	3	142212029	C	A	Missense	NM_001184	c.6023G>T	p.R2008L			0.00067	0.119278	7	5
ATR	3	142212041	A	T	Missense	NM_001184	c.6011T>A	p.L2004Q			0	0.416154	1	0
ATR	3	142215213	A	C	Missense	NM_001184	c.5888T>G	p.L1963R			0	0.353499	0	1
ATR	3	142215882	C	G	Missense	NM_001184	c.5711G>C	p.R1904P			0	0.457924	0	1
ATR	3	142215882	C	T	Missense	NM_001184	c.5711G>A	p.R1904Q			3.3e-05	0.373945	1	0
ATR	3	142215891	A	C	Missense	NM_001184	c.5702T>G	p.L1901R			0	0.416154	0	1
ATR	3	142217571	A	G	Missense	NM_001184	c.5426T>C	p.L1809S			0	0.339575	0	2
ATR	3	142222294	A	C	Missense	NM_001184	c.5198T>G	p.I1733S			9.1e-06	0.249073	1	0
ATR	3	142231224	C	A	Missense	NM_001184	c.4730G>T	p.S1577I			0.00012	0.0849847	0	2
ATR	3	142232345	C	T	Missense	NM_001184	c.4639G>A	p.E1547K			9e-06	0.186418	0	1
ATR	3	142234250	T	C	Missense	NM_001184	c.4490A>G	p.Y1497C			7.2e-05	0.0848441	1	0
ATR	3	142242884	C	T	Missense	NM_001184	c.4103G>A	p.R1368Q			0	0.242112	0	1
ATR	3	142253942	C	T	Missense	NM_001184	c.3925G>A	p.E1309K			9e-06	0.0959158	1	0
ATR	3	142259762	G	A	Missense	NM_001184	c.3565C>T	p.P1189S			0	0.116801	0	1
ATR	3	142259830	T	G	Missense	NM_001184	c.3497A>C	p.H1166P			0	0.179456	1	0
ATR	3	142261556	A	G	Missense	NM_001184	c.3401T>C	p.F1134S			0	0.339575	1	0
ATR	3	142268403	A	G	Missense	NM_001184	c.3089T>C	p.I1030T			0	0.290843	0	1
ATR	3	142268479	T	C	Missense	NM_001184	c.3013A>G	p.K1005E			0	0.172495	1	0
ATR	3	142268976	T	G	Missense	NM_001184	c.2974A>C	p.T992P			0	0.109839	0	1
ATR	3	142272151	T	C	Missense	NM_001184	c.2723A>G	p.Y908C			9e-06	0.144648	0	1
ATR	3	142272169	G	C	Missense	NM_001184	c.2705C>G	p.S902C			9e-06	0.0889541	0	1
ATR	3	142272186	C	A	Missense	NM_001184	c.2688G>T	p.L896F			0	0.249073	1	0
ATR	3	142272491	T	A	Missense	NM_001184	c.2624A>T	p.D875V			0	0.186418	0	1
ATR	3	142272521	A	C	Missense	NM_001184	c.2594T>G	p.L865R			0	0.346537	1	0
ATR	3	142275310	C	T	Missense	NM_001184	c.1993G>A	p.E665K			3e-05	0.281887	1	1
ATR	3	142281117	C	T	Missense	NM_001184	c.1127G>A	p.C376Y			6.5e-05	0.220163	0	1
ATR	3	142285068	G	T	Missense	NM_001184	c.187C>A	p.P63T			0	0.0889541	1	0
ATR	3	142297546	T	A	Missense	NM_001184	c.1A>T	p.M1L			0	0.228188	0	1
ATRIP	3	48488448	G	A	Missense	NM_130384	c.199G>A	p.A67T			0	0.151609	0	1
ATRIP	3	48491532	G	A	Missense	NM_130384	c.337G>A	p.E113K			6.5e-05	0.150546	1	1
ATRIP	3	48493159	C	T	Missense	NM_130384	c.406C>T	p.L136F			0	0.144648	0	1
ATRIP	3	48493235	G	C	Missense	NM_130384	c.482G>C	p.R161T			0	0.0959158	0	1
ATRIP	3	48493298	C	T	Missense	NM_130384	c.545C>T	p.S182F			9.1e-06	0.0889541	0	2
ATRIP	3	48498694	A	G	Missense	NM_130384	c.707A>G	p.E236G			0	0.109839	1	0
ATRIP	3	48501258	T	C	Missense	NM_130384	c.998T>C	p.L333P			9.7e-05	0.212417	0	1
ATRIP	3	48501624	C	T	Missense	NM_130384	c.1171C>T	p.R391W			3.2e-05	0.112029	1	0
ATRIP	3	48501625	G	T	Missense	NM_130384	c.1172G>T	p.R391L			1.8e-05	0.154752	0	1
ATRIP	3	48502087	T	C	Missense	NM_130384	c.1634T>C	p.L545P			9e-06	0.346537	1	1
ATRIP	3	48505269	G	A	Missense	NM_130384	c.1871G>A	p.C624Y			0	0.346537	1	0
ATRIP	3	48505523	G	A	Missense	NM_130384	c.1966G>A	p.E656K			0	0.144648	0	1
ATRIP	3	48506234	T	A	Missense	NM_130384	c.2060T>A	p.V687D			0	0.346537	1	0
ATRIP	3	48506336	G	A	Missense	NM_130384	c.2162G>A	p.R721Q			0	0.256035	1	0
ATRIP	3	48506404	G	T	Missense	NM_130384	c.2230G>T	p.V744F			6.6e-05	0.171	4	1
AUNIP	1	26161524	T	C	Missense	NM_024037	c.1034A>G	p.Q345R			0.0002	0.110233	1	0
AUNIP	1	26161662	G	A	Missense	NM_024037	c.896C>T	p.A299V			0	0.256035	1	0
AUNIP	1	26161677	C	T	Missense	NM_024037	c.881G>A	p.G294D			5.4e-05	0.161101	0	1
AUNIP	1	26163996	T	C	Missense	NM_024037	c.128A>G	p.E43G			0	0.116801	1	0
BARD1	2	215593443	A	G	Missense	NM_000465	c.2291T>C	p.I764T			3.2e-05	-0.0480898	2	0
BARD1	2	215593519	A	C	Missense	NM_000465	c.2215T>G	p.Y739D			0	0.068069	1	0
BARD1	2	215593534	T	C	Missense	NM_000465	c.2200A>G	p.T734A			0	0.23515	0	1
BARD1	2	215593567	G	C	Missense	NM_000465	c.2167C>G	p.H723D			0	0.416154	1	0
BARD1	2	215593605	T	A	Missense	NM_000465	c.2129A>T	p.D710V			9e-06	0.23515	1	1
BARD1	2	215609826	C	T	Missense	NM_000465	c.1868G>A	p.G623E			2.7e-05	0.135148	0	1
BARD1	2	215609836	A	G	Missense	NM_000465	c.1858T>C	p.C620R			0	0.221226	1	0
BARD1	2	215610448	G	A	Missense	NM_000465	c.1808C>T	p.T603I			0	0.116801	1	0
BARD1	2	215610476	C	A	Missense	NM_000465	c.1780G>T	p.A594S			0	0.0819924	0	2
BARD1	2	215610530	C	T	Missense	NM_000465	c.1726G>A	p.G576R			0	0.0819924	1	0
BARD1	2	215610563	G	A	Missense	NM_000465	c.1693C>T	p.R565C			9.7e-05	0.0105278	1	0
BARD1	2	215617263	G	A	Missense	NM_000465	c.1585C>T	p.R529W			6.5e-05	0.227124	0	1
BARD1	2	215617266	G	T	Missense	NM_000465	c.1582C>A	p.L528M			0	0.0193371	1	0
BARD1	2	215632206	A	G	Missense	NM_000465	c.1568T>C	p.V523A			0	0.0332605	2	1
BARD1	2	215632276	C	T	Missense	NM_000465	c.1498G>A	p.D500N			9e-06	0.00541374	1	0
BARD1	2	215632305	G	A	Missense	NM_000465	c.1469C>T	p.T490I			0	0.0332605	1	0
BARD1	2	215632326	T	C	Missense	NM_000465	c.1448A>G	p.H483R			3e-05	0.0521509	1	0
BARD1	2	215632345	C	T	Missense	NM_000465	c.1429G>A	p.V477M			9e-06	0.242112	0	1
BARD1	2	215632345	C	A	Missense	NM_000465	c.1429G>T	p.V477L			0	0.172495	1	0
BARD1	2	215632363	G	A	Missense	NM_000465	c.1411C>T	p.H471Y			9e-06	0.00541374	0	1
BARD1	2	215632377	T	C	Missense	NM_000465	c.1397A>G	p.H466R			6e-05	0.279811	0	1
BARD1	2	215633987	T	C	Missense	NM_000465	c.1364A>G	p.N455S			0	0.00541374	0	1
BARD1	2	215633991	G	C	Missense	NM_000465	c.1360C>G	p.P454A			9e-06	0.186418	0	1
BARD1	2	215634012	G	C	Missense	NM_000465	c.1339C>G	p.L447V			0.00017	0.197258	3	2
BARD1	2	215645291	G	C	Missense	NM_000465	c.1307C>G	p.S436C			1.8e-05	0.00159456	0	1
BARD1	2	215645309	G	C	Missense	NM_000465	c.1289C>G	p.T430S			1.8e-05	0.168675	1	0
BARD1	2	215645354	T	G	Missense	NM_000465	c.1244A>C	p.K415T			0	0.158571	0	1
BARD1	2	215645423	G	A	Missense	NM_000465	c.1175C>T	p.P392L			0	0.0471839	0	1
BARD1	2	215645457	T	A	Missense	NM_000465	c.1141A>T	p.S381C			0	-0.0154714	0	1
BARD1	2	215645876	G	T	Missense	NM_000465	c.722C>A	p.S241Y			0	0.0471839	1	0
BARD1	2	215645954	T	C	Missense	NM_000465	c.644A>G	p.N215S			0	-0.0293948	0	1
BARD1	2	215646060	A	G	Missense	NM_000465	c.538T>C	p.Y180H			0	0.0750307	1	0
BARD1	2	215646105	T	A	Missense	NM_000465	c.493A>T	p.T165S			0	-0.0433182	1	0
BARD1	2	215646153	G	A	Missense	NM_000465	c.445C>T	p.P149S			0	0.144648	0	1
BARD1	2	215646173	G	A	Missense	NM_000465	c.425C>T	p.S142L			0	0.0332605	1	0
BARD1	2	215657119	G	A	Missense	NM_000465	c.266C>T	p.P89L			3.3e-05	0.185979	0	1
BARD1	2	215661788	C	G	Missense	NM_000465	c.212G>C	p.C71S			0	0.548426	1	0
BARD1	2	215661788	C	A	Missense	NM_000465	c.212G>T	p.C71F			0	0.548426	1	0
BARD1	2	215661825	C	G	Missense	NM_000465	c.175G>C	p.E59Q			0	0.00541374	1	0
BARD1	2	215674166	C	G	Missense	NM_000465	c.128G>C	p.R43P			0	0.0471839	1	0
BAZ1B	7	72863888	G	A	Missense	NM_032408	c.3712C>T	p.R1238C			3e-05	0.156576	1	1
BAZ1B	7	72863904	C	G	Missense	NM_032408	c.3696G>C	p.Q1232H			0	0.0750307	0	1
BAZ1B	7	72883862	C	A	Missense	NM_032408	c.2851G>T	p.D951Y			0	0.144648	1	0
BAZ1B	7	72883915	A	G	Missense	NM_032408	c.2798T>C	p.I933T			4.5e-05	0.151295	2	0
BAZ1B	7	72883924	T	A	Missense	NM_032408	c.2789A>T	p.H930L			0	0.172495	0	1
BAZ1B	7	72884687	C	T	Missense	NM_032408	c.2720G>A	p.R907Q			1.8e-05	0.47499	0	1
BAZ1B	7	72884712	G	A	Missense	NM_032408	c.2695C>T	p.R899C			3.6e-05	0.236781	1	0
BAZ1B	7	72891530	T	C	Missense	NM_032408	c.2261A>G	p.H754R			0	0.207303	1	0
BAZ1B	7	72891611	T	C	Missense	NM_032408	c.2180A>G	p.E727G			0	0.221226	1	0
BAZ1B	7	72891651	T	C	Missense	NM_032408	c.2140A>G	p.K714E			9e-06	0.0750307	0	1
BAZ1B	7	72892020	G	C	Missense	NM_032408	c.1771C>G	p.P591A			0	0.179456	0	1
BAZ1B	7	72892070	A	G	Missense	NM_032408	c.1721T>C	p.L574S			0	0.0819924	1	0
BAZ1B	7	72925158	C	G	Missense	NM_032408	c.132G>C	p.R44S			0	0.179456	0	1
BLM	15	91306328	A	G	Missense	NM_001287246	c.2015A>G	p.Q672R			5.4e-05	0.474378	2	0
BLM	15	91308537	A	G	Missense	NM_001287246	c.2086A>G	p.S696G			0	0.450963	0	1
BLM	15	91337541	G	C	Missense	NM_001287246	c.3164G>C	p.C1055S			1.8e-05	0.419297	1	0
BLOC1S2	10	102040768	A	G	Missense	NM_173809	c.215T>C	p.L72P			0	0.262997	0	1
BPTF	17	65850061	C	G	Missense	NM_182641	c.619C>G	p.R207G			0	0.123763	0	1
BPTF	17	65850297	G	C	Missense	NM_182641	c.855G>C	p.E285D			9e-06	0.36046	1	0
BPTF	17	65850454	A	G	Missense	NM_182641	c.1012A>G	p.K338E			0	0.0750307	0	1
BPTF	17	65850482	A	G	Missense	NM_182641	c.1040A>G	p.Q347R			0	0.102878	0	1
BPTF	17	65850841	C	T	Missense	NM_182641	c.1399C>T	p.R467W			6e-05	0.189309	2	0
BPTF	17	65862693	G	T	Missense	NM_182641	c.1550G>T	p.C517F			1.8e-05	0.384488	1	0
BPTF	17	65871806	A	G	Missense	NM_004459	c.1999A>G	p.S667G			9.1e-06	0.0889541	1	0
BPTF	17	65907308	C	T	Missense	NM_182641	c.3308C>T	p.S1103F			0	0.0889541	0	1
BPTF	17	65907845	A	G	Missense	NM_182641	c.3845A>G	p.D1282G			0	0.0959158	1	0
BPTF	17	65908343	C	T	Missense	NM_182641	c.4343C>T	p.P1448L			0	0.200341	1	2
BPTF	17	65908595	A	G	Missense	NM_182641	c.4595A>G	p.E1532G			9e-06	0.249073	1	0
BPTF	17	65908744	A	G	Missense	NM_182641	c.4744A>G	p.K1582E			0	0.172495	2	0
BPTF	17	65908867	T	A	Missense	NM_182641	c.4867T>A	p.S1623T			9e-06	0.130724	1	0
BPTF	17	65909041	G	A	Missense	NM_182641	c.5041G>A	p.E1681K			0	0.242112	1	0
BPTF	17	65909198	G	A	Missense	NM_182641	c.5198G>A	p.R1733Q			0	0.430077	1	0
BPTF	17	65914844	C	T	Missense	NM_182641	c.5318C>T	p.T1773I			9e-06	0.262997	0	1
BPTF	17	65928048	C	G	Missense	NM_182641	c.6172C>G	p.R2058G			0	0.31869	1	0
BPTF	17	65928112	G	A	Missense	NM_182641	c.6236G>A	p.R2079Q			9e-06	0.123763	1	2
BPTF	17	65936710	C	T	Missense	NM_182641	c.6415C>T	p.R2139C			0	0.283882	1	0
BPTF	17	65940312	C	T	Missense	NM_182641	c.6524C>T	p.T2175I			9e-06	0.23515	0	1
BPTF	17	65940474	C	T	Missense	NM_182641	c.6686C>T	p.S2229F			9e-06	0.228188	0	1
BPTF	17	65940477	C	T	Missense	NM_182641	c.6689C>T	p.T2230M			0	0.0959158	1	0
BPTF	17	65941834	G	T	Missense	NM_182641	c.7010G>T	p.G2337V			9e-06	0.256035	1	0
BPTF	17	65955867	C	T	Missense	NM_182641	c.8137C>T	p.R2713W			9e-06	0.151609	0	1
BPTF	17	65955964	T	C	Missense	NM_182641	c.8234T>C	p.I2745T			0	0.269958	0	1
BPTF	17	65960509	C	T	Missense	NM_182641	c.8443C>T	p.R2815C			0	0.172495	1	0
BRIP1	17	59763509	G	A	Missense	NM_032043	c.2593C>T	p.R865W			5.8e-05	0.326259	1	0
BRIP1	17	59763520	G	C	Missense	NM_032043	c.2582C>G	p.S861C			2.7e-05	0.302229	1	0
BRIP1	17	59770868	A	G	Missense	NM_032043	c.2498T>C	p.I833T			0	0.52058	1	0
BRIP1	17	59793325	G	T	Missense	NM_032043	c.2479C>A	p.Q827K			0	0.478809	1	0
BRIP1	17	59793335	C	A	Missense	NM_032043	c.2469G>T	p.R823S			1.8e-05	0.461067	2	0
BRIP1	17	59793354	T	C	Missense	NM_032043	c.2450A>G	p.Y817C			0	0.513618	0	1
BRIP1	17	59793355	A	G	Missense	NM_032043	c.2449T>C	p.Y817H			0	0.437039	0	1
BRIP1	17	59820423	C	T	Missense	NM_032043	c.2330G>A	p.R777H			8.9e-05	0.390416	1	0
BRIP1	17	59820424	G	A	Missense	NM_032043	c.2329C>T	p.R777C			3.2e-05	0.453153	1	0
BRIP1	17	59820469	G	A	Missense	NM_032043	c.2284C>T	p.R762C			5.8e-05	0.24968	1	0
BRIP1	17	59820489	G	C	Missense	NM_032043	c.2264C>G	p.A755G			0	0.242112	0	1
BRIP1	17	59821919	T	C	Missense	NM_032043	c.2131A>G	p.T711A			0	0.221226	1	0
BRIP1	17	59821930	C	A	Missense	NM_032043	c.2120G>T	p.R707L			6.5e-05	0.206239	1	0
BRIP1	17	59853772	G	A	Missense	NM_032043	c.2087C>T	p.P696L			8.1e-05	0.387136	3	2
BRIP1	17	59853790	C	T	Missense	NM_032043	c.2069G>A	p.G690E			0	0.388307	1	0
BRIP1	17	59853875	C	T	Missense	NM_032043	c.1984G>A	p.A662T			1.8e-05	0.175637	0	1
BRIP1	17	59857707	A	G	Missense	NM_032043	c.1850T>C	p.L617S			9e-06	0.297805	0	1
BRIP1	17	59871058	T	C	Missense	NM_032043	c.1373A>G	p.E458G			0	0.179456	1	0
BRIP1	17	59885898	C	T	Missense	NM_032043	c.848G>A	p.C283Y			9e-06	0.513618	1	1
BRIP1	17	59885949	G	A	Missense	NM_032043	c.797C>T	p.T266M			7.2e-05	0.217116	1	2
BRIP1	17	59885994	C	T	Missense	NM_032043	c.752G>A	p.R251H			1.8e-05	0.468028	1	0
BRIP1	17	59886105	C	G	Missense	NM_032043	c.641G>C	p.C214S			1.8e-05	0.307909	0	1
BRIP1	17	59938872	A	G	Missense	NM_032043	c.29T>C	p.I10T			0	0.388307	1	0
C2CD4A	15	62360815	C	T	Missense	NM_207322	c.1003C>T	p.R335C			0	0.0889541	1	0
C4orf48	4	2044525	A	G	Missense	NM_001141936	c.196A>G	p.K66E			0	0.137686	1	0
C6orf211/ARMT1	6	151779511	C	T	Missense	NM_024573	c.196C>T	p.R66W			0	0.186418	1	0
C6orf211/ARMT1	6	151789917	A	G	Missense	NM_024573	c.998A>G	p.H333R			5.4e-05	0.0914841	1	3
C6orf211/ARMT1	6	151790031	G	A	Missense	NM_024573	c.1112G>A	p.R371K			0	0.23515	1	0
C6orf211/ARMT1	6	151790216	G	A	Missense	NM_024573	c.1297G>A	p.G433R			0	0.179456	1	0
C6orf57/SDHAF4	6	71298410	C	G	Missense	NM_145267	c.310C>G	p.R104G			0	0.325652	0	1
C6orf57/SDHAF4	6	71298411	G	A	Missense	NM_145267	c.311G>A	p.R104H			0.0006	0.0969036	5	14
CCDC11/CFAP53	18	47769305	A	C	Missense	NM_145020	c.1178T>G	p.V393G			3e-05	0.12873	0	0
CCDC11/CFAP53	18	47787442	C	A	Missense	NM_145020	c.465G>T	p.Q155H			0	0.130724	1	0
CCDC11/CFAP53	18	47792740	T	C	Missense	NM_145020	c.35A>G	p.E12G			0	0.179456	1	0
CCDC66	3	56597721	A	G	Missense	NM_001012506	c.10A>G	p.K4E			0	0.256035	1	0
CCDC66	3	56597779	C	T	Missense	NM_001012506	c.68C>T	p.T23I			0	0.214265	1	0
CCDC66	3	56597782	A	G	Missense	NM_001012506	c.71A>G	p.Q24R			1.7e-05	0.123193	1	0
CCDC66	3	56597890	A	G	Missense	NM_001012506	c.179A>G	p.D60G			0	0.19338	0	1
CCDC66	3	56598055	T	C	Missense	NM_001012506	c.344T>C	p.L115S			3.3e-05	0.234711	1	0
CCDC66	3	56598057	G	C	Missense	NM_001012506	c.346G>C	p.V116L			0	0.339575	1	0
CCDC66	3	56601004	T	C	Missense	NM_001012506	c.635T>C	p.I212T			6.3e-05	0.207097	0	1
CCDC66	3	56601015	C	G	Missense	NM_001012506	c.646C>G	p.L216V			6e-05	0.119692	1	1
CCDC66	3	56601045	T	G	Missense	NM_001012506	c.676T>G	p.L226V			0	0.172495	0	1
CCDC66	3	56647636	T	C	Missense	NM_001012506	c.1322T>C	p.V441A			2.7e-05	0.107301	0	1
CCDC66	3	56647639	A	G	Missense	NM_001012506	c.1325A>G	p.E442G			0	0.130724	0	1
CCDC66	3	56649271	A	G	Missense	NM_001012506	c.1580A>G	p.D527G			9e-06	0.200341	0	1
CCDC66	3	56651398	C	T	Missense	NM_001012506	c.2000C>T	p.P667L			0	0.207303	0	1
CCDC7	10	32740722	T	A	Missense	NM_145023	c.152T>A	p.M51K			0	0.249073	1	2
CDH1	16	68771350	T	C	Missense	NM_004360	c.32T>C	p.L11P			0	0.0123754	1	0
CDH1	16	68772239	C	A	Missense	NM_004360	c.88C>A	p.P30T			0.005	-0.0822712	21	25
CDH1	16	68772296	G	C	Missense	NM_004360	c.145G>C	p.G49R			0	0.0123754	1	0
CDH1	16	68835573	T	G	Missense	NM_004360	c.164T>G	p.V55G			5.4e-05	0.119331	1	1
CDH1	16	68835591	C	T	Missense	NM_004360	c.182C>T	p.T61I			0	-0.0224331	1	0
CDH1	16	68835630	G	A	Missense	NM_004360	c.221G>A	p.R74Q			0	-0.0850884	0	1
CDH1	16	68835638	G	A	Missense	NM_004360	c.229G>A	p.V77M			0	0.0611073	0	1
CDH1	16	68835713	G	T	Missense	NM_004360	c.304G>T	p.A102S			1.8e-05	-0.0192905	0	1
CDH1	16	68842438	G	A	Missense	NM_004360	c.499G>A	p.E167K			1.8e-05	-0.0610607	1	0
CDH1	16	68842618	A	T	Missense	NM_004360	c.554A>T	p.E185V			0	-0.0572416	1	0
CDH1	16	68842684	T	C	Missense	NM_004360	c.620T>C	p.I207T			6.5e-05	0.261933	0	1
CDH1	16	68842738	T	C	Missense	NM_004360	c.674T>C	p.I225T			1.8e-05	0.0642499	0	0
CDH1	16	68844124	A	C	Missense	NM_004360	c.712A>C	p.N238H			1.8e-05	-0.0749841	1	0
CDH1	16	68844196	T	G	Missense	NM_004360	c.784T>G	p.F262V			0	0.416154	1	0
CDH1	16	68845600	G	A	Missense	NM_004360	c.846G>A	p.M282I			4.5e-05	0.151295	1	0
CDH1	16	68845758	G	A	Missense	NM_004360	c.1004G>A	p.R335Q			8.9e-05	0.230297	2	0
CDH1	16	68846147	C	T	Missense	NM_004360	c.1118C>T	p.P373L			0.00023	0.233654	1	0
CDH1	16	68847264	C	A	Missense	NM_004360	c.1186C>A	p.L396M			0	-0.00850966	0	1
CDH1	16	68847303	T	C	Missense	NM_004360	c.1225T>C	p.W409R			4.5e-05	0.206989	0	1
CDH1	16	68847387	A	C	Missense	NM_004360	c.1309A>C	p.K437Q			0	-0.0363565	0	1
CDH1	16	68849430	G	C	Missense	NM_004360	c.1333G>C	p.E445Q			0	0.367422	1	0
CDH1	16	68849431	A	C	Missense	NM_004360	c.1334A>C	p.E445A			9e-06	0.409192	1	0
CDH1	16	68849445	T	A	Missense	NM_004360	c.1348T>A	p.Y450N			4.5e-05	0.220912	1	2
CDH1	16	68849559	C	G	Missense	NM_004360	c.1462C>G	p.P488A			0	0.109839	0	1
CDH1	16	68853187	C	G	Missense	NM_004360	c.1570C>G	p.R524G			6.5e-05	-0.0583053	0	1
CDH1	16	68853292	A	G	Missense	NM_004360	c.1675A>G	p.S559G			0	-0.0781267	1	0
CDH1	16	68856068	T	G	Missense	NM_004360	c.1876T>G	p.F626V			0	0.123763	0	1
CDH1	16	68857353	A	G	Missense	NM_004360	c.1988A>G	p.Y663C			9e-06	0.353499	1	0
CDH1	16	68857517	C	A	Missense	NM_004360	c.2152C>A	p.L718I			0	-0.0433182	1	0
CDH1	16	68862158	G	A	Missense	NM_004360	c.2246G>A	p.R749Q			0.00047	0.0805553	0	1
CDH1	16	68862178	G	A	Missense	NM_004360	c.2266G>A	p.D756N			0	-0.0363565	0	1
CDH1	16	68863576	T	G	Missense	NM_004360	c.2315T>G	p.L772R			0	0.464886	1	0
CDH1	16	68863596	C	T	Missense	NM_004360	c.2335C>T	p.R779W			0	0.256035	1	0
CDH1	16	68863597	G	A	Missense	NM_004360	c.2336G>A	p.R779Q			2.7e-05	0.0655309	0	0
CDH1	16	68863600	C	T	Missense	NM_004360	c.2339C>T	p.P780L			0	0.311729	0	1
CDH1	16	68863604	A	T	Missense	NM_004360	c.2343A>T	p.E781D			2.7e-05	-0.0249712	1	1
CDH1	16	68863632	C	T	Missense	NM_004360	c.2371C>T	p.L791F			9e-06	-0.0920501	0	1
CDH1	16	68863657	C	G	Missense	NM_004360	c.2396C>G	p.P799R			0	0.36046	0	1
CDH1	16	68863660	G	T	Missense	NM_004360	c.2399G>T	p.R800L			0	0.36046	0	1
CDH1	16	68863660	G	A	Missense	NM_004360	c.2399G>A	p.R800H			0	0.214265	0	1
CDH1	16	68867227	C	T	Missense	NM_004360	c.2474C>T	p.P825L			3e-05	0.226193	1	0
CDH1	16	68867247	G	A	Missense	NM_004360	c.2494G>A	p.V832M			0.0019	0.104453	3	0
CDH1	16	68867268	G	A	Missense	NM_004360	c.2515G>A	p.G839S			0.00046	0.0332596	1	0
CDH1	16	68867274	G	A	Missense	NM_004360	c.2521G>A	p.E841K			9e-06	0.0541456	1	0
CDH1	16	68867348	G	C	Missense	NM_004360	c.2595G>C	p.W865C			6.5e-05	0.338512	0	1
CDH1	16	68867355	C	T	Missense	NM_004360	c.2602C>T	p.R868C			0	0.416154	0	2
CDH1	16	68867356	G	A	Missense	NM_004360	c.2603G>A	p.R868H			0.00012	0.217257	1	0
CDS1	4	85530627	C	G	Missense	NM_001263	c.291C>G	p.I97M			0	0.116801	0	0
CDS1	4	85553013	C	T	Missense	NM_001263	c.622C>T	p.R208C			0	0.221226	1	0
CDS1	4	85566400	A	T	Missense	NM_001263	c.1178A>T	p.H393L			0	0.374384	1	1
CDS1	4	85566428	T	G	Missense	NM_001263	c.1206T>G	p.C402W			1.8e-05	0.266139	1	0
CEACAM1	19	43013365	A	T	Missense	NM_001712	c.1477T>A	p.Y493N			9.1e-06	0.123763	0	1
CEACAM1	19	43023303	C	A	Missense	NM_001712	c.1043G>T	p.C348F			9e-06	0.262997	1	0
CEACAM1	19	43026081	A	C	Missense	NM_001712	c.698T>G	p.V233G			0	0.221226	1	0
CEP104	1	3742378	C	A	Missense	NM_014704	c.2308G>T	p.D770Y			9e-06	0.346537	1	0
CEP104	1	3746521	C	T	Missense	NM_014704	c.1877G>A	p.R626H			0.00023	0.205807	0	1
CEP104	1	3746522	G	A	Missense	NM_014704	c.1876C>T	p.R626C			2.7e-05	0.364884	0	1
CEP104	1	3750451	C	G	Missense	NM_014704	c.1634G>C	p.R545P			0	0.311729	0	1
CEP104	1	3750583	A	G	Missense	NM_014704	c.1502T>C	p.L501S			0	0.374384	1	0
CEP104	1	3751601	A	G	Missense	NM_014704	c.1373T>C	p.L458S			0	0.186418	0	1
CEP104	1	3751622	C	T	Missense	NM_014704	c.1352G>A	p.R451Q			0.00012	0.217257	1	2
CEP104	1	3753244	G	T	Missense	NM_014704	c.1132C>A	p.P378T			9e-06	0.19338	1	0
CEP104	1	3755581	G	A	Missense	NM_014704	c.838C>T	p.R280C			1.8e-05	0.203484	0	1
CEP104	1	3755614	C	T	Missense	NM_014704	c.805G>A	p.A269T			0.00047	0.143211	5	3
CEP104	1	3755635	C	T	Missense	NM_014704	c.784G>A	p.E262K			1.8e-05	0.182599	2	0
CEP104	1	3756264	G	C	Missense	NM_014704	c.643C>G	p.R215G			0	0.304767	0	1
CEP104	1	3756296	A	C	Missense	NM_014704	c.611T>G	p.M204R			0	0.311729	1	0
CEP104	1	3756297	T	C	Missense	NM_014704	c.610A>G	p.M204V			0	0.186418	1	0
CEP104	1	3761893	A	T	Missense	NM_014704	c.449T>A	p.I150N			0	0.290843	0	1
CEP104	1	3764176	A	G	Missense	NM_014704	c.289T>C	p.Y97H			9e-06	0.137686	1	0
CEP104	1	3765244	A	G	Missense	NM_014704	c.215T>C	p.I72T			9e-06	0.249073	2	1
CEP104	1	3765320	C	A	Missense	NM_014704	c.139G>T	p.V47F			0	0.228188	1	0
CEP104	1	3768934	G	A	Missense	NM_014704	c.38C>T	p.S13F			0	0.471848	1	0
CEP55	10	95262874	T	C	Missense	NM_001127182	c.188T>C	p.I63T			0	0.179456	0	1
CEP55	10	95263057	A	G	Missense	NM_001127182	c.371A>G	p.E124G			1.8e-05	0.161714	0	1
CEP55	10	95275205	G	A	Missense	NM_001127182	c.572G>A	p.R191Q			6.5e-05	0.164469	1	0
CEP55	10	95275214	A	G	Missense	NM_001127182	c.581A>G	p.Y194C			5.4e-05	0.126293	0	2
CEP55	10	95279481	C	T	Missense	NM_001127182	c.1108C>T	p.R370C			3.2e-05	0.160761	1	0
CHEK2	22	29090060	C	T	Missense	NM_007194	c.1421G>A	p.R474H			0.00014	0.264174	2	0
CHEK2	22	29090061	G	A	Missense	NM_007194	c.1420C>T	p.R474C			3e-05	0.365427	2	0
CHEK2	22	29091174	T	C	Missense	NM_007194	c.1316A>G	p.Q439R			0	0.304767	1	0
CHEK2	22	29091220	A	G	Missense	NM_007194	c.1270T>C	p.Y424H			6.3e-05	0.193174	5	0
CHEK2	22	29091774	C	G	Missense	NM_007194	c.1183G>C	p.V395L			6.5e-05	0.164469	1	0
CHEK2	22	29092893	A	G	Missense	NM_007194	c.1091T>C	p.I364T			3.6e-05	0.222858	1	0
CHEK2	22	29092914	G	A	Missense	NM_007194	c.1070C>T	p.S357F			0	0.36046	1	0
CHEK2	22	29092917	G	A	Missense	NM_007194	c.1067C>T	p.S356L			3.6e-05	0.0905852	1	0
CHEK2	22	29092933	C	T	Missense	NM_007194	c.1051G>A	p.E351K			0	0.325652	0	1
CHEK2	22	29092945	C	T	Missense	NM_007194	c.1039G>A	p.D347N			3e-05	0.142653	3	1
CHEK2	22	29092947	C	T	Missense	NM_007194	c.1037G>A	p.R346H			1.8e-05	0.370565	0	1
CHEK2	22	29092948	G	A	Missense	NM_007194	c.1036C>T	p.R346C			9e-05	0.215906	4	0
CHEK2	22	29092951	G	A	Missense	NM_007194	c.1033C>T	p.H345Y			9e-06	0.423116	0	2
CHEK2	22	29095831	C	G	Missense	NM_007194	c.1003G>C	p.V335L			9e-06	0.165533	1	0
CHEK2	22	29095854	T	C	Missense	NM_007194	c.980A>G	p.Y327C			3.2e-05	0.223417	2	0
CHEK2	22	29095857	A	G	Missense	NM_007194	c.977T>C	p.L326P			0	0.339575	1	0
CHEK2	22	29095911	T	C	Missense	NM_007194	c.923A>G	p.E308G			0	0.297805	1	0
CHEK2	22	29095917	C	T	Missense	NM_007194	c.917G>A	p.G306E			3.3e-05	0.26952	1	0
CHEK2	22	29095917	C	G	Missense	NM_007194	c.917G>C	p.G306A			0.00012	0.175487	2	0
CHEK2	22	29095919	T	G	Missense	NM_007194	c.915A>C	p.E305D			2.7e-05	0.0585692	2	0
CHEK2	22	29095921	C	T	Missense	NM_007194	c.913G>A	p.E305K			0	0.290843	1	0
CHEK2	22	29099495	T	G	Missense	NM_007194	c.906A>C	p.E302D			7.1e-05	0.0504751	1	0
CHEK2	22	29107929	T	C	Missense	NM_007194	c.760A>G	p.R254G			0	0.116801	0	0
CHEK2	22	29107938	T	A	Missense	NM_007194	c.751A>T	p.I251F			0	0.290843	2	1
CHEK2	22	29107962	A	G	Missense	NM_007194	c.727T>C	p.C243R			2.7e-05	0.114263	0	4
CHEK2	22	29107974	C	T	Missense	NM_007194	c.715G>A	p.E239K			0.00024	0.14222	1	3
CHEK2	22	29107985	T	C	Missense	NM_007194	c.704A>G	p.K235R			0	0.0471839	0	1
CHEK2	22	29107995	C	T	Missense	NM_007194	c.694G>A	p.G232R			0	0.430077	1	0
CHEK2	22	29107997	C	T	Missense	NM_007194	c.692G>A	p.C231Y			0	0.346537	1	0
CHEK2	22	29108003	C	A	Missense	NM_007194	c.686G>T	p.G229V			0	0.548426	1	0
CHEK2	22	29121018	C	T	Missense	NM_007194	c.539G>A	p.R180H			0.00027	0.0836914	2	3
CHEK2	22	29121019	G	A	Missense	NM_007194	c.538C>T	p.R180C			0.0032	0.0806354	16	11
CHEK2	22	29121050	A	C	Missense	NM_007194	c.507T>G	p.F169L			1.8e-05	0.182599	3	2
CHEK2	22	29121057	C	T	Missense	NM_007194	c.500G>A	p.G167E			1.8e-05	0.544607	1	0
CHEK2	22	29121058	C	T	Missense	NM_007194	c.499G>A	p.G167R			6.5e-05	0.435975	2	0
CHEK2	22	29121078	A	G	Missense	NM_007194	c.479T>C	p.I160T			9e-06	0.353499	2	1
CHEK2	22	29121241	C	T	Missense	NM_007194	c.434G>A	p.R145Q			2.7e-05	0.22565	1	0
CHEK2	22	29121242	G	A	Missense	NM_007194	c.433C>T	p.R145W			6e-05	0.321582	5	2
CHEK2	22	29121248	G	A	Missense	NM_007194	c.427C>T	p.H143Y			0	0.416154	1	0
CHEK2	22	29121254	T	G	Missense	NM_007194	c.421A>C	p.K141Q			0	0.249073	1	0
CHEK2	22	29121283	T	G	Missense	NM_007194	c.392A>C	p.K131T			0	0.0889541	0	1
CHEK2	22	29121292	G	A	Missense	NM_007194	c.383C>T	p.P128L			0	0.068069	1	0
CHEK2	22	29121325	C	T	Missense	NM_007194	c.350G>A	p.R117K			0	0.388307	1	0
CHEK2	22	29121326	T	C	Missense	NM_007194	c.349A>G	p.R117G			0.00019	0.350505	6	4
CHEK2	22	29130397	T	G	Missense	NM_007194	c.313A>C	p.N105H			0	0.165533	0	1
CHEK2	22	29130406	C	T	Missense	NM_007194	c.304G>A	p.G102R			0	0.430077	0	1
CHEK2	22	29130441	G	A	Missense	NM_007194	c.269C>T	p.P90L			2.7e-05	0.190841	1	0
CHEK2	22	29130456	G	C	Missense	NM_007194	c.254C>G	p.P85R			2.7e-05	0.162995	1	0
CHEK2	22	29130471	G	T	Missense	NM_007194	c.239C>A	p.P80H			0	0.102878	0	1
CHEK2	22	29130502	C	T	Missense	NM_007194	c.208G>A	p.E70K			5.8e-05	0.12437	0	0
CHEK2	22	29130525	G	C	Missense	NM_007194	c.185C>G	p.S62C			0	0.207303	0	1
CHEK2	22	29130540	G	A	Missense	NM_007194	c.170C>T	p.S57F			9e-06	0.207303	0	2
CHEK2	22	29130595	A	G	Missense	NM_007194	c.115T>C	p.S39P			0	0.130724	1	0
CHEK2	22	29130703	G	A	Missense	NM_007194	c.7C>T	p.R3W			0.00036	0.0607464	4	0
CIDEB	14	24775172	C	T	Missense	NM_014430	c.508G>A	p.G170S			0	0.0750307	1	0
CIDEB	14	24775185	G	C	Missense	NM_014430	c.495C>G	p.D165E			0	0.102878	1	0
CIDEB	14	24775276	G	A	Missense	NM_014430	c.404C>T	p.T135I			5.8e-05	0.326259	1	0
CIDEB	14	24775286	C	A	Missense	NM_014430	c.394G>T	p.A132S			9e-06	0.27692	0	1
CIDEB	14	24776630	G	A	Missense	NM_014430	c.133C>T	p.R45W			3e-05	0.226193	1	0
CLCN2	3	184064480	C	G	Missense	NM_004366	c.2611G>C	p.E871Q			9e-06	0.0959158	0	1
CLCN2	3	184064489	C	T	Missense	NM_004366	c.2602G>A	p.E868K			0	0.325652	1	0
CLCN2	3	184064518	C	T	Missense	NM_004366	c.2573G>A	p.R858Q			8.9e-05	0.0910625	0	1
CLCN2	3	184064539	C	T	Missense	NM_004366	c.2552G>A	p.R851Q			1.8e-05	0.287024	0	1
CLCN2	3	184064540	G	A	Missense	NM_004366	c.2551C>T	p.R851W			0	0.423116	2	0
CLCN2	3	184071132	C	T	Missense	NM_004366	c.1934G>A	p.R645Q			4.7e-05	0.147494	2	0
CLCN2	3	184071135	C	T	Missense	NM_004366	c.1931G>A	p.R644H			0	0.172495	1	0
CLCN2	3	184071144	C	A	Missense	NM_004366	c.1922G>T	p.S641I			0	0.158571	1	0
CLCN2	3	184071458	T	C	Missense	NM_004366	c.1847A>G	p.E616G			9e-06	0.339575	0	1
CLCN2	3	184071510	C	T	Missense	NM_004366	c.1795G>A	p.D599N			0.0013	-0.248317	12	12
CLCN2	3	184071548	C	T	Missense	NM_004366	c.1757G>A	p.R586Q			0.00013	0.0982351	1	0
CLCN2	3	184071575	C	G	Missense	NM_004366	c.1730G>C	p.R577P			9.6e-06	0.332614	0	1
CLCN2	3	184071977	C	T	Missense	NM_004366	c.1633G>A	p.A545T			0.00032	0.294639	4	2
CLCN2	3	184072001	C	A	Missense	NM_004366	c.1609G>T	p.A537S			0	0.346537	1	0
CLCN2	3	184072004	T	A	Missense	NM_004366	c.1606A>T	p.I536F			9e-06	0.485771	1	0
CLCN2	3	184072010	C	G	Missense	NM_004366	c.1600G>C	p.V534L			0.00023	0.170999	1	2
CLCN2	3	184072049	C	T	Missense	NM_004366	c.1561G>A	p.V521M			5.8e-05	0.312335	0	1
CLCN2	3	184072081	G	A	Missense	NM_004366	c.1529C>T	p.A510V			9.1e-05	0.250245	2	4
CLCN2	3	184072342	C	T	Missense	NM_004366	c.1501G>A	p.V501M			0	0.409192	2	0
CLCN2	3	184072404	C	G	Missense	NM_004366	c.1439G>C	p.W480S			9e-06	0.36046	1	0
CLCN2	3	184072739	G	C	Missense	NM_004366	c.1349C>G	p.T450S			0	0.200341	0	1
CLCN2	3	184073266	G	A	Missense	NM_004366	c.1222C>T	p.R408C			0	0.151609	0	1
CLCN2	3	184073274	G	A	Missense	NM_004366	c.1214C>T	p.T405M			6.5e-05	0.28978	2	1
CLCN2	3	184074794	A	G	Missense	NM_004366	c.1072T>C	p.F358L			1.8e-05	0.356641	1	1
CLCN2	3	184074821	T	C	Missense	NM_004366	c.1045A>G	p.M349V			0	0.242112	0	1
CLCN2	3	184074838	C	T	Missense	NM_004366	c.1028G>A	p.R343Q			6.6e-05	0.372889	1	0
CLCN2	3	184074847	T	C	Missense	NM_004366	c.1019A>G	p.Y340C			0.0012	0.214649	1	1
CLCN2	3	184074993	C	A	Missense	NM_004366	c.960G>T	p.E320D			3e-05	0.407198	1	0
CLCN2	3	184075013	A	T	Missense	NM_004366	c.940T>A	p.F314I			0	0.290843	0	1
CLCN2	3	184075021	C	T	Missense	NM_004366	c.932G>A	p.R311Q			9e-06	0.290843	1	0
CLCN2	3	184075159	G	A	Missense	NM_004366	c.889C>T	p.R297W			1.8e-05	0.314871	0	1
CLCN2	3	184075230	C	T	Missense	NM_004366	c.818G>A	p.R273Q			1.8e-05	0.47499	0	1
CLCN2	3	184075258	C	T	Missense	NM_004366	c.790G>A	p.E264K			0	0.576273	0	1
CLCN2	3	184075449	C	T	Missense	NM_004366	c.731G>A	p.C244Y			2.7e-05	0.483233	0	3
CLCN2	3	184075461	A	G	Missense	NM_004366	c.719T>C	p.L240P			0.0003	0.3523	3	5
CLCN2	3	184075476	C	T	Missense	NM_004366	c.704G>A	p.R235Q			0.0015	0.141222	8	23
CLCN2	3	184075587	G	A	Missense	NM_004366	c.673C>T	p.L225F			9e-06	0.102878	0	1
CLCN2	3	184075594	G	T	Missense	NM_004366	c.666C>A	p.F222L			1.8e-05	0.10602	1	0
CLCN2	3	184075626	C	T	Missense	NM_004366	c.634G>A	p.A212T			8.1e-05	0.352327	3	1
CLCN2	3	184075775	C	T	Missense	NM_004366	c.590G>A	p.G197D			0	0.555388	0	1
CLCN2	3	184075787	G	C	Missense	NM_004366	c.578C>G	p.T193S			0	0.207303	0	1
CLCN2	3	184075833	C	T	Missense	NM_004366	c.532G>A	p.E178K			0.00013	0.293163	0	2
CLCN2	3	184075856	A	G	Missense	NM_004366	c.509T>C	p.I170T			0	0.52058	0	1
CLCN2	3	184075857	T	C	Missense	NM_004366	c.508A>G	p.I170V			3.6e-05	0.181087	0	1
CLCN2	3	184075859	G	T	Missense	NM_004366	c.506C>A	p.T169N			9e-06	0.27692	1	0
CLCN2	3	184076056	A	G	Missense	NM_004366	c.395T>C	p.L132P			9e-06	0.52058	1	1
CLCN2	3	184076554	C	T	Missense	NM_004366	c.268G>A	p.D90N			0	0.158571	1	0
CLCN2	3	184076568	G	T	Missense	NM_004366	c.254C>A	p.S85Y			0.00018	0.117288	1	0
CLCN2	3	184076777	C	A	Missense	NM_004366	c.206G>T	p.C69F			0.00024	0.218799	3	0
CLCN2	3	184076858	C	G	Missense	NM_004366	c.125G>C	p.R42P			0	0.402231	0	1
CLCN2	3	184076858	C	A	Missense	NM_004366	c.125G>T	p.R42L			0	0.325652	0	1
CLCN2	3	184076865	G	A	Missense	NM_004366	c.118C>T	p.R40W			1.8e-05	0.440182	1	0
CLEC10A	17	6978437	C	T	Missense	NM_182906	c.887G>A	p.C296Y			0	0.325652	1	0
CLINT1	5	157214667	T	A	Missense	NM_014666	c.1865A>T	p.N622I			0	0.123763	1	0
CLINT1	5	157216376	T	A	Missense	NM_014666	c.1526A>T	p.Q509L			0	0.102878	1	0
CLINT1	5	157216475	G	A	Missense	NM_014666	c.1427C>T	p.T476I			0	0.228188	0	1
CLINT1	5	157221932	G	A	Missense	NM_014666	c.1061C>T	p.A354V			0	0.0750307	1	0
CLINT1	5	157233119	C	G	Missense	NM_014666	c.697G>C	p.D233H			0	0.123763	0	1
CLINT1	5	157240082	C	T	Missense	NM_014666	c.506G>A	p.G169E			0	0.0819924	0	1
CLINT1	5	157240156	C	G	Missense	NM_014666	c.432G>C	p.R144S			6.5e-05	0.0809287	0	2
CLUH	17	2594912	A	G	Missense	NM_015229	c.3737T>C	p.I1246T			9.1e-06	0.36046	0	0
CLUH	17	2595062	G	A	Missense	NM_015229	c.3665C>T	p.P1222L			0	0.0750307	1	0
CLUH	17	2595326	T	C	Missense	NM_015229	c.3509A>G	p.K1170R			0	0.242112	0	1
CLUH	17	2595344	G	C	Missense	NM_015229	c.3491C>G	p.S1164W			3.1e-05	0.256222	0	1
CLUH	17	2595385	G	C	Missense	NM_015229	c.3450C>G	p.H1150Q			1e-05	0.409192	0	1
CLUH	17	2595688	T	G	Missense	NM_015229	c.3410A>C	p.Y1137S			1.9e-05	0.485582	1	2
CLUH	17	2595924	C	T	Missense	NM_015229	c.3262G>A	p.A1088T			0	0.19338	0	1
CLUH	17	2595924	C	A	Missense	NM_015229	c.3262G>T	p.A1088S			9.1e-06	0.158571	0	1
CLUH	17	2595986	T	A	Missense	NM_015229	c.3200A>T	p.H1067L			0	0.214265	0	1
CLUH	17	2596078	T	G	Missense	NM_015229	c.3191A>C	p.E1064A			0	0.23515	0	1
CLUH	17	2597237	C	G	Missense	NM_015229	c.3071G>C	p.R1024P			0	0.353499	0	1
CLUH	17	2597316	A	G	Missense	NM_015229	c.2992T>C	p.C998R			0.00046	0.0750298	0	1
CLUH	17	2597519	C	T	Missense	NM_015229	c.2872G>A	p.E958K			0	0.339575	1	0
CLUH	17	2598250	C	T	Missense	NM_015229	c.2636G>A	p.G879E			0	0.339575	0	1
CLUH	17	2598299	C	T	Missense	NM_015229	c.2587G>A	p.E863K			3.6e-05	0.181087	1	0
CLUH	17	2598337	C	T	Missense	NM_015229	c.2549G>A	p.S850N			0	0.0889541	0	1
CLUH	17	2598394	C	G	Missense	NM_015229	c.2492G>C	p.G831A			0	0.221226	1	0
CLUH	17	2598522	G	A	Missense	NM_015229	c.2480C>T	p.T827M			1.8e-05	0.287024	1	0
CLUH	17	2598696	G	T	Missense	NM_015229	c.2399C>A	p.P800Q			0	0.228188	0	1
CLUH	17	2598730	G	C	Missense	NM_015229	c.2365C>G	p.L789V			0.0006	0.145636	2	5
CLUH	17	2598750	C	T	Missense	NM_015229	c.2345G>A	p.R782Q			0	0.402231	0	1
CLUH	17	2598817	T	C	Missense	NM_015229	c.2278A>G	p.K760E			0	0.269958	0	1
CLUH	17	2599488	C	G	Missense	NM_015229	c.2239G>C	p.A747P			0	0.423116	0	1
CLUH	17	2599490	G	A	Missense	NM_015229	c.2237C>T	p.A746V			0	0.262997	0	1
CLUH	17	2599491	C	T	Missense	NM_015229	c.2236G>A	p.A746T			0	0.269958	1	0
CLUH	17	2599547	C	T	Missense	NM_015229	c.2180G>A	p.R727H			0	0.130724	1	0
CLUH	17	2599747	A	T	Missense	NM_015229	c.2154T>A	p.N718K			0	0.207303	0	1
CLUH	17	2599787	A	C	Missense	NM_015229	c.2114T>G	p.V705G			0	0.430077	1	0
CLUH	17	2599815	C	G	Missense	NM_015229	c.2086G>C	p.E696Q			1.2e-05	0.123763	0	0
CLUH	17	2600022	C	G	Missense	NM_015229	c.2062G>C	p.D688H			0	0.0819924	0	1
CLUH	17	2600063	A	T	Missense	NM_015229	c.2021T>A	p.L674Q			6e-05	0.126654	0	1
CLUH	17	2601200	C	A	Missense	NM_015229	c.1837G>T	p.V613L			0	0.144648	1	0
CLUH	17	2601220	T	C	Missense	NM_015229	c.1817A>G	p.Q606R			9.8e-05	0.156065	0	1
CLUH	17	2601259	A	T	Missense	NM_015229	c.1778T>A	p.F593Y			2.4e-05	0.12641	0	1
CLUH	17	2601274	C	T	Missense	NM_015229	c.1763G>A	p.C588Y			0	0.0959158	1	0
CLUH	17	2601322	G	A	Missense	NM_015229	c.1715C>T	p.P572L			6.9e-05	0.232354	0	1
CLUH	17	2601359	G	A	Missense	NM_015229	c.1678C>T	p.R560C			0	0.471848	1	0
CLUH	17	2601434	C	G	Missense	NM_015229	c.1603G>C	p.V535L			3.5e-05	0.210585	1	0
CLUH	17	2601469	C	G	Missense	NM_015229	c.1568G>C	p.R523P			0	0.0819924	0	0
CLUH	17	2601541	C	T	Missense	NM_015229	c.1496G>A	p.S499N			0	0.102878	1	0
CLUH	17	2601581	A	G	Missense	NM_015229	c.1456T>C	p.S486P			0	0.478809	0	1
CLUH	17	2601581	A	C	Missense	NM_015229	c.1456T>G	p.S486A			0	0.283882	1	0
CLUH	17	2601589	G	A	Missense	NM_015229	c.1448C>T	p.T483M			0	0.430077	0	0
CLUH	17	2601622	G	A	Missense	NM_015229	c.1415C>T	p.T472M			9e-06	0.31869	1	0
CLUH	17	2601631	G	A	Missense	NM_015229	c.1406C>T	p.T469M			0.00017	0.225105	1	1
CLUH	17	2601731	A	G	Missense	NM_015229	c.1306T>C	p.Y436H			0	0.457924	0	1
CLUH	17	2601839	C	T	Missense	NM_015229	c.1198G>A	p.V400I			0	0.109839	0	1
CLUH	17	2601863	C	T	Missense	NM_015229	c.1174G>A	p.A392T			0	0.283882	1	0
CLUH	17	2601881	G	A	Missense	NM_015229	c.1156C>T	p.H386Y			0	0.269958	1	0
CLUH	17	2603708	C	T	Missense	NM_015229	c.1120G>A	p.E374K			6.6e-05	0.205808	0	1
CLUH	17	2603710	G	A	Missense	NM_015229	c.1118C>T	p.P373L			9e-06	0.137686	0	1
CLUH	17	2604018	T	C	Missense	NM_015229	c.1013A>G	p.D338G			0	0.430077	0	1
CLUH	17	2604060	G	A	Missense	NM_015229	c.971C>T	p.A324V			0	0.151609	1	0
CLUH	17	2604474	G	A	Missense	NM_015229	c.871C>T	p.P291S			2.7e-05	0.190841	0	1
CLUH	17	2604495	C	T	Missense	NM_015229	c.850G>A	p.E284K			0	0.388307	1	0
CLUH	17	2604687	G	A	Missense	NM_015229	c.758C>T	p.A253V			5.6e-05	0.330776	2	2
CLUH	17	2604705	C	T	Missense	NM_015229	c.740G>A	p.R247Q			0.0001	0.106006	1	0
CLUH	17	2604790	T	C	Missense	NM_015229	c.655A>G	p.T219A			0	0.0750307	1	1
CLUH	17	2605319	C	T	Missense	NM_015229	c.394G>A	p.V132M			6.6e-05	0.12923	1	0
CLUH	17	2605327	C	T	Missense	NM_015229	c.386G>A	p.R129H			0	0.283882	0	1
CLUH	17	2606621	C	A	Missense	NM_015229	c.352G>T	p.V118L			0	0.200341	0	1
CLUH	17	2606716	C	T	Missense	NM_015229	c.257G>A	p.R86H			0	0.325652	0	2
CLUH	17	2606741	T	C	Missense	NM_015229	c.232A>G	p.M78V			5.8e-05	0.200948	1	0
CLUH	17	2606779	G	A	Missense	NM_015229	c.194C>T	p.S65F			0	0.409192	0	1
COL5A2	2	189898885	G	A	Missense	NM_000393	c.4411C>T	p.R1471C			5.8e-05	0.221833	0	1
COL5A2	2	189898912	A	G	Missense	NM_000393	c.4384T>C	p.F1462L			0	0.186418	0	1
COL5A2	2	189899675	T	A	Missense	NM_000393	c.4320A>T	p.R1440S			3e-05	0.25404	1	1
COL5A2	2	189899688	T	C	Missense	NM_000393	c.4307A>G	p.E1436G			2.7e-05	0.162995	0	1
COL5A2	2	189899715	C	T	Missense	NM_000393	c.4280G>A	p.G1427E			0	0.31869	0	1
COL5A2	2	189901359	T	C	Missense	NM_000393	c.4096A>G	p.M1366V			0	0.158571	1	0
COL5A2	2	189901379	G	A	Missense	NM_000393	c.4076C>T	p.P1359L			3.2e-05	0.1538	1	0
COL5A2	2	189904045	G	A	Missense	NM_000393	c.3878C>T	p.A1293V			9e-06	0.381346	0	1
COL5A2	2	189904087	A	G	Missense	NM_000393	c.3836T>C	p.I1279T			9e-06	0.423116	0	1
COL5A2	2	189904129	T	C	Missense	NM_000393	c.3794A>G	p.D1265G			0.00012	0.259027	1	1
COL5A2	2	189904156	G	A	Missense	NM_000393	c.3767C>T	p.A1256V			9e-06	0.186418	1	0
COL5A2	2	189904232	C	T	Missense	NM_000393	c.3691G>A	p.A1231T			9e-06	0.116801	1	0
COL5A2	2	189904249	G	A	Missense	NM_000393	c.3674C>T	p.P1225L			0	0.27692	0	0
COL5A2	2	189904255	G	A	Missense	NM_000393	c.3668C>T	p.P1223L			0.00017	0.0789095	0	2
COL5A2	2	189904265	G	A	Missense	NM_000393	c.3658C>T	p.P1220S			7.3e-05	0.0704797	1	2
COL5A2	2	189906416	G	A	Missense	NM_000393	c.3529C>T	p.P1177S			1.8e-05	0.224369	1	0
COL5A2	2	189909934	G	T	Missense	NM_000393	c.3334C>A	p.P1112T			0	0.283882	0	1
COL5A2	2	189909934	G	A	Missense	NM_000393	c.3334C>T	p.P1112S			0	0.228188	1	0
COL5A2	2	189910627	G	A	Missense	NM_000393	c.3208C>T	p.R1070C			6.5e-05	0.324588	1	1
COL5A2	2	189912958	G	A	Missense	NM_000393	c.3178C>T	p.R1060W			9.9e-05	0.0788245	0	2
COL5A2	2	189915296	G	A	Missense	NM_000393	c.3038C>T	p.A1013V			0	0.109839	0	1
COL5A2	2	189915312	C	T	Missense	NM_000393	c.3022G>A	p.G1008S			0.00013	0.418473	1	0
COL5A2	2	189915317	A	T	Missense	NM_000393	c.3017T>A	p.M1006K			0.00026	0.0985667	1	0
COL5A2	2	189915353	A	G	Missense	NM_000393	c.2981T>C	p.I994T			3.4e-05	0.365373	0	2
COL5A2	2	189916096	G	A	Missense	NM_000393	c.2881C>T	p.P961S			3.6e-05	0.153241	2	1
COL5A2	2	189916147	G	A	Missense	NM_000393	c.2830C>T	p.R944C			6.5e-05	0.150546	1	0
COL5A2	2	189917479	G	A	Missense	NM_000393	c.2711C>T	p.P904L			5.8e-05	0.110446	0	1
COL5A2	2	189917701	G	A	Missense	NM_000393	c.2597C>T	p.P866L			9e-06	0.23515	1	1
COL5A2	2	189917722	A	G	Missense	NM_000393	c.2576T>C	p.V859A			3e-05	0.0869594	0	1
COL5A2	2	189917735	C	T	Missense	NM_000393	c.2563G>A	p.G855R			9e-06	0.583235	1	0
COL5A2	2	189922081	C	T	Missense	NM_000393	c.2302G>A	p.G768R			9e-06	0.590197	0	1
COL5A2	2	189922092	G	C	Missense	NM_000393	c.2291C>G	p.P764R			0.001	0.236088	2	1
COL5A2	2	189923601	C	T	Missense	NM_000393	c.2104G>A	p.G702R			1.8e-05	0.579416	0	0
COL5A2	2	189925493	G	A	Missense	NM_000393	c.2048C>T	p.P683L			9e-06	0.214265	1	0
COL5A2	2	189927750	C	T	Missense	NM_000393	c.1909G>A	p.V637I			0	0.137686	1	0
COL5A2	2	189927971	G	A	Missense	NM_000393	c.1796C>T	p.P599L			6.5e-05	0.136622	1	0
COL5A2	2	189929284	C	T	Missense	NM_000393	c.1715G>A	p.R572Q			5.8e-05	0.110446	1	1
COL5A2	2	189929318	C	T	Missense	NM_000393	c.1681G>A	p.G561R			0	0.576273	0	1
COL5A2	2	189929366	G	A	Missense	NM_000393	c.1633C>T	p.R545W			9e-05	0.313369	1	0
COL5A2	2	189931460	C	T	Missense	NM_000393	c.1450G>A	p.E484K			0	0.249073	1	0
COL5A2	2	189931498	C	G	Missense	NM_000393	c.1412G>C	p.G471A			7.2e-05	0.419006	0	2
COL5A2	2	189933525	G	A	Missense	NM_000393	c.1244C>T	p.S415F			0	0.0889541	0	1
COL5A2	2	189933559	T	C	Missense	NM_000393	c.1210A>G	p.R404G			0	0.158571	0	1
COL5A2	2	189933585	C	T	Missense	NM_000393	c.1184G>A	p.R395Q			0	0.249073	0	1
COL5A2	2	189940129	G	C	Missense	NM_000393	c.1094C>G	p.P365R			9e-06	0.221226	1	0
COL5A2	2	189945717	C	A	Missense	NM_000393	c.905G>T	p.R302L			1.8e-05	0.210446	0	1
COL5A2	2	189957049	T	C	Missense	NM_000393	c.554A>G	p.D185G			1.9e-05	0.234961	0	1
COL5A2	2	189957077	G	A	Missense	NM_000393	c.526C>T	p.P176S			0	0.165533	1	0
COL5A2	2	189957079	G	A	Missense	NM_000393	c.524C>T	p.P175L			0	0.165533	1	0
COL5A2	2	189957140	G	A	Missense	NM_000393	c.463C>T	p.R155C			6.8e-05	0.211904	2	2
COL5A2	2	189964850	G	T	Missense	NM_000393	c.352C>A	p.P118T			0	0.304767	0	1
COL5A2	2	190044326	A	G	Missense	NM_000393	c.5T>C	p.M2T			7.9e-05	0.172228	0	3
COL5A2	2	190044330	T	C	Missense	NM_000393	c.1A>G	p.M1V			9.2e-05	0.249774	1	0
CTBP1	4	1206789	C	T	Missense	NM_001328	c.1051G>A	p.V351I			9e-06	0.0889541	0	1
CTBP1	4	1209952	C	T	Missense	NM_001328	c.589G>A	p.G197S			9e-06	0.283882	1	0
CTBP1	4	1222052	A	T	Missense	NM_001328	c.275T>A	p.L92H			0	0.492733	0	1
CTBP1	4	1222115	A	G	Missense	NM_001328	c.212T>C	p.V71A			0	0.137686	0	1
CTBP1	4	1222122	C	T	Missense	NM_001328	c.205G>A	p.E69K			0	0.221226	0	1
CTBP1	4	1232017	G	A	Missense	NM_001328	c.149C>T	p.T50I			0	0.27692	0	1
CTBP1	4	1232113	G	T	Missense	NM_001328	c.53C>A	p.P18Q			0	0.165533	0	1
DARS2	1	173795908	T	C	Missense	NM_018122	c.211T>C	p.W71R			0	0.430077	0	1
DARS2	1	173800731	G	T	Missense	NM_018122	c.455G>T	p.C152F			0.00067	0.0914308	1	5
DARS2	1	173802529	C	T	Missense	NM_018122	c.508C>T	p.R170W			5.9e-05	0.337864	1	0
DARS2	1	173802541	C	T	Missense	NM_018122	c.520C>T	p.R174C			1.8e-05	0.481952	0	2
DARS2	1	173802557	G	A	Missense	NM_018122	c.536G>A	p.R179H			0.00014	0.312906	2	2
DARS2	1	173802570	G	A	Missense	NM_018122	c.549G>A	p.M183I			0	0.207303	1	0
DARS2	1	173802584	G	A	Missense	NM_018122	c.563G>A	p.R188Q			9e-06	0.339575	0	1
DARS2	1	173802613	C	T	Missense	NM_018122	c.592C>T	p.R198W			9e-06	0.464886	0	1
DARS2	1	173803611	G	A	Missense	NM_018122	c.617G>A	p.G206E			0	0.242112	1	0
DARS2	1	173803625	G	A	Missense	NM_018122	c.631G>A	p.E211K			0	0.457924	0	1
DARS2	1	173806142	C	T	Missense	NM_018122	c.728C>T	p.P243L			0	0.450963	1	0
DARS2	1	173806156	C	A	Missense	NM_018122	c.742C>A	p.Q248K			1.8e-05	0.43322	1	0
DARS2	1	173806174	G	A	Missense	NM_018122	c.760G>A	p.G254S			0.00013	0.300124	1	0
DARS2	1	173807345	G	A	Missense	NM_018122	c.788G>A	p.R263Q			5.8e-05	0.326259	0	1
DARS2	1	173822583	G	A	Missense	NM_018122	c.1441G>A	p.V481M			1.8e-05	0.287024	2	1
DARS2	1	173822638	C	T	Missense	NM_018122	c.1496C>T	p.S499L			9e-06	0.332614	0	1
DARS2	1	173822936	C	T	Missense	NM_018122	c.1567C>T	p.R523C			6.5e-05	0.303703	0	1
DARS2	1	173822937	G	A	Missense	NM_018122	c.1568G>A	p.R523H			0	0.339575	0	1
DARS2	1	173825808	A	T	Missense	NM_018122	c.1679A>T	p.D560V			0	0.430077	1	0
DARS2	1	173826781	C	G	Missense	NM_018122	c.1876C>G	p.L626V			0	0.290843	0	1
DGAT2	11	75501277	T	C	Missense	NM_032564	c.295T>C	p.C99R			9e-06	0.165533	1	0
DGAT2	11	75501756	C	G	Missense	NM_032564	c.409C>G	p.R137G			0	0.172495	0	1
DGAT2	11	75507406	A	T	Missense	NM_032564	c.463A>T	p.N155Y			0	0.137686	1	0
DGAT2	11	75507533	G	A	Missense	NM_032564	c.590G>A	p.G197D			0	0.214265	1	1
DGAT2	11	75507569	T	G	Missense	NM_032564	c.626T>G	p.M209R			0	0.228188	1	0
DGAT2	11	75511435	C	G	Missense	NM_032564	c.1049C>G	p.P350R			0	0.249073	2	1
DGAT2	11	75511506	A	G	Missense	NM_032564	c.1120A>G	p.K374E			1.8e-05	0.287024	1	0
DKKL1	19	49878152	C	A	Missense	NM_014419	c.596C>A	p.A199D			0	0.214265	1	0
DKKL1	19	49878175	G	A	Missense	NM_014419	c.619G>A	p.G207R			9.2e-06	0.242112	1	0
DKKL1	19	49878239	G	A	Missense	NM_014419	c.683G>A	p.R228Q			2.8e-05	0.116913	0	1
DLX6	7	96637108	G	C	Missense	NM_005222	c.595G>C	p.E199Q			0	0.31869	1	1
DLX6	7	96639235	C	T	Missense	NM_005222	c.758C>T	p.P253L			0	0.353499	0	1
DLX6	7	96639250	C	G	Missense	NM_005222	c.773C>G	p.S258C			0	0.19338	0	1
DLX6	7	96639255	T	G	Missense	NM_005222	c.778T>G	p.S260A			0	0.0959158	1	0
DLX6	7	96639262	A	G	Missense	NM_005222	c.785A>G	p.K262R			9e-06	0.151609	0	2
DNAH11	7	21583035	C	T	Missense	NM_001277115	c.172C>T	p.R58W			0	-0.0293948	1	0
DNAH11	7	21599379	G	T	Missense	NM_001277115	c.851G>T	p.R284M	rs1210488980	4.27339e-06	0	0.0402222	0	0
DNAH11	7	21599403	A	G	Missense	NM_001277115	c.875A>G	p.Y292C	rs768404895	1.84684e-05	3.3e-05	-0.0507185	1	0
DNAH11	7	21600699	C	T	Missense	NM_001277115	c.893C>T	p.P298L			0	-0.0224331	0	1
DNAH11	7	21600744	G	T	Missense	NM_001277115	c.938G>T	p.S313I	rs1388667729	8.52544e-06	0	-0.0293948	1	0
DNAH11	7	21600747	A	G	Missense	NM_001277115	c.941A>G	p.Y314C	rs374176081	3.39718e-05	7e-05	0.00914298	1	0
DNAH11	7	21603812	G	A	Missense	NM_001277115	c.991G>A	p.E331K	rs550602612	0.000121816	0.00026	-0.0337056	1	1
DNAH11	7	21603861	A	C	Missense	NM_001277115	c.1040A>C	p.Q347P			0	-0.0363565	1	0
DNAH11	7	21603968	C	T	Missense	NM_001277115	c.1147C>T	p.R383W	rs200648006	4.64365e-05	9e-05	0.0836333	1	1
DNAH11	7	21603985	G	C	Missense	NM_001277115	c.1164G>C	p.L388F			0	0.0123754	0	1
DNAH11	7	21603989	G	A	Missense	NM_001277115	c.1168G>A	p.E390K	rs771348362	4.02998e-06	9e-06	0.00541374	0	1
DNAH11	7	21603990	A	G	Missense	NM_001277115	c.1169A>G	p.E390G			0	0.0262988	0	1
DNAH11	7	21609711	G	T	Missense	NM_001277115	c.1219G>T	p.D407Y	rs1238780598	4.13712e-06	0	-0.00154796	0	1
DNAH11	7	21621577	A	G	Missense	NM_001277115	c.1648A>G	p.R550G			0	0.0471839	1	0
DNAH11	7	21628179	G	A	Missense	NM_001277115	c.1898G>A	p.G633E	rs773421259	1.20528e-05	2.7e-05	0.295267	1	0
DNAH11	7	21628873	A	G	Missense	NM_001277115	c.2021A>G	p.E674G			0	-0.00154796	1	0
DNAH11	7	21628912	A	G	Missense	NM_001277115	c.2060A>G	p.Y687C	rs372935096	1.44279e-05	3.3e-05	-0.00198655	3	1
DNAH11	7	21630866	G	T	Missense	NM_001277115	c.2338G>T	p.V780F			0	0.068069	1	0
DNAH11	7	21630882	T	G	Missense	NM_001277115	c.2354T>G	p.I785S			0	0.186418	0	1
DNAH11	7	21630903	T	C	Missense	NM_001277115	c.2375T>C	p.I792T			0	-0.0293948	0	1
DNAH11	7	21631170	G	T	Missense	NM_001277115	c.2642G>T	p.G881V			0	-0.0363565	1	0
DNAH11	7	21639469	T	A	Missense	NM_001277115	c.2732T>A	p.I911N	rs746755614	7.20139e-06	9.1e-06	-0.0224331	0	1
DNAH11	7	21639478	T	G	Missense	NM_001277115	c.2741T>G	p.I914S	rs774552662	4.04318e-06	9e-06	0.00541374	1	0
DNAH11	7	21639612	C	T	Missense	NM_001277115	c.2875C>T	p.P959S			0	0.144648	1	0
DNAH11	7	21640426	C	G	Missense	NM_001277115	c.3133C>G	p.R1045G			0	0.0193371	1	0
DNAH11	7	21640427	G	T	Missense	NM_001277115	c.3134G>T	p.R1045L	rs754350576	4.03076e-06	9e-06	0.00541374	0	0
DNAH11	7	21640732	G	T	Missense	NM_001277115	c.3360G>T	p.L1120F			0	0.00541374	0	1
DNAH11	7	21640787	G	C	Missense	NM_001277115	c.3415G>C	p.V1139L			0	-0.0224331	1	0
DNAH11	7	21641126	A	G	Missense	NM_001277115	c.3538A>G	p.R1180G	rs1360010493	8.03865e-06	9e-06	-0.0572416	0	1
DNAH11	7	21646050	C	T	Missense	NM_001277115	c.3655C>T	p.P1219S	rs1052272234	4.18624e-06	0	-0.0293948	0	1
DNAH11	7	21646289	A	G	Missense	NM_001277115	c.3790A>G	p.R1264G	rs749057056	8.18719e-06	1.8e-05	-0.0471373	1	1
DNAH11	7	21654889	G	C	Missense	NM_001277115	c.4010G>C	p.R1337P			0	0.0471839	0	1
DNAH11	7	21655833	A	T	Missense	NM_001277115	c.4018A>T	p.I1340F			0	-0.0224331	0	1
DNAH11	7	21655852	C	T	Missense	NM_001277115	c.4037C>T	p.T1346I	rs367884384	8.03684e-06	1.8e-05	0.0642499	0	2
DNAH11	7	21655899	A	G	Missense	NM_001277115	c.4084A>G	p.R1362G			0	-0.0224331	0	1
DNAH11	7	21657365	G	T	Missense	NM_001277115	c.4224G>T	p.R1408S	rs200216579	0.000190204	0.0004	0.0624488	7	3
DNAH11	7	21659641	G	A	Missense	NM_001277115	c.4445G>A	p.G1482D	rs374100278	8.15355e-06	0	-0.0433182	1	0
DNAH11	7	21675619	C	G	Missense	NM_001277115	c.4631C>G	p.S1544C			0	-0.00154796	1	0
DNAH11	7	21675658	G	C	Missense	NM_001277115	c.4670G>C	p.R1557P			0	0.165533	1	0
DNAH11	7	21675688	T	C	Missense	NM_001277115	c.4700T>C	p.F1567S	rs764051000	4.03796e-06	3.3e-05	0.346098	1	0
DNAH11	7	21677263	T	C	Missense	NM_001277115	c.4760T>C	p.V1587A	rs758562003	1.87319e-05	4.3e-05	0.00879465	0	1
DNAH11	7	21678558	C	T	Missense	NM_001277115	c.4819C>T	p.L1607F	rs767567230	2.56758e-05	6.4e-05	0.0674349	1	0
DNAH11	7	21678576	G	C	Missense	NM_001277115	c.4837G>C	p.A1613P			0	0.179456	0	1
DNAH11	7	21678577	C	T	Missense	NM_001277115	c.4838C>T	p.A1613V	rs780444366	4.05518e-06	9e-06	0.0541456	0	1
DNAH11	7	21678623	C	G	Missense	NM_001277115	c.4884C>G	p.F1628L	rs762090852	4.01606e-06	1.8e-05	0.266139	0	1
DNAH11	7	21695564	G	A	Missense	NM_001277115	c.5059G>A	p.V1687I	rs1236771486	1.08079e-05	3e-05	-0.0522746	0	1
DNAH11	7	21698522	T	G	Missense	NM_001277115	c.5201T>G	p.I1734S			0	0.179456	0	1
DNAH11	7	21721201	G	T	Missense	NM_001277115	c.5366G>T	p.G1789V	rs371790332	2.00742e-05	4.5e-05	0.0538316	0	1
DNAH11	7	21721231	T	C	Missense	NM_001277115	c.5396T>C	p.I1799T	rs754635719	7.12753e-06	9e-06	0.144648	1	0
DNAH11	7	21723444	C	T	Missense	NM_001277115	c.5503C>T	p.H1835Y			0	0.00541374	0	1
DNAH11	7	21723556	C	T	Missense	NM_001277115	c.5615C>T	p.T1872I			0	0.23515	0	1
DNAH11	7	21726722	A	G	Missense	NM_001277115	c.5627A>G	p.Y1876C			0	0.123763	1	0
DNAH11	7	21726728	C	A	Missense	NM_001277115	c.5633C>A	p.T1878N			0	-0.0154714	0	1
DNAH11	7	21726760	G	T	Missense	NM_001277115	c.5665G>T	p.G1889W			0	0.249073	0	1
DNAH11	7	21726782	G	C	Missense	NM_001277115	c.5687G>C	p.G1896A			0	0.304767	0	1
DNAH11	7	21726785	C	T	Missense	NM_001277115	c.5690C>T	p.T1897I	rs376904276	4.43964e-05	9.9e-05	0.0231309	1	1
DNAH11	7	21726835	G	T	Missense	NM_001277115	c.5740G>T	p.V1914F	rs201671992	0.000119516	0.00023	0.0317646	1	1
DNAH11	7	21726848	A	G	Missense	NM_001277115	c.5753A>G	p.N1918S	rs1426072826	4.34786e-06	0	-0.00154796	1	0
DNAH11	7	21727085	T	A	Missense	NM_001277115	c.5864T>A	p.L1955Q	rs370052217	1.99799e-05	3.6e-05	0.153241	1	2
DNAH11	7	21727096	G	C	Missense	NM_001277115	c.5875G>C	p.A1959P			0	0.123763	0	1
DNAH11	7	21730468	G	A	Missense	NM_001277115	c.6010G>A	p.E2004K	rs772193258	0.000222152	3.3e-05	-0.0437568	1	0
DNAH11	7	21737754	G	A	Missense	NM_001277115	c.6103G>A	p.G2035S			0	0.23515	0	1
DNAH11	7	21737824	C	T	Missense	NM_001277115	c.6173C>T	p.S2058F	rs765090393	6.83104e-05	0.00013	-0.0549223	0	1
DNAH11	7	21742412	G	A	Missense	NM_001277115	c.6265G>A	p.E2089K			0	0.151609	0	1
DNAH11	7	21744059	T	C	Missense	NM_001277115	c.6281T>C	p.M2094T	rs1304820248	4.04279e-06	3e-05	0.0382275	1	0
DNAH11	7	21744134	A	G	Missense	NM_001277115	c.6356A>G	p.D2119G			0	0.165533	0	1
DNAH11	7	21744154	G	A	Missense	NM_001277115	c.6376G>A	p.V2126M	rs772530809	1.0706e-05	1.8e-05	-0.0262522	0	2
DNAH11	7	21744160	C	T	Missense	NM_001277115	c.6382C>T	p.R2128W	rs765958695	1.78445e-05	2.7e-05	-0.0458563	0	1
DNAH11	7	21744200	C	G	Missense	NM_001277115	c.6422C>G	p.S2141C			0	-0.0502799	0	1
DNAH11	7	21745113	C	G	Missense	NM_001277115	c.6504C>G	p.H2168Q			0	0.0611073	1	0
DNAH11	7	21747405	A	G	Missense	NM_001277115	c.6635A>G	p.E2212G			0	0.0611073	1	0
DNAH11	7	21750245	C	A	Missense	NM_001277115	c.6758C>A	p.P2253Q			0	0.130724	0	1
DNAH11	7	21750262	G	T	Missense	NM_001277115	c.6775G>T	p.D2259Y			0	0.395269	1	0
DNAH11	7	21750304	G	A	Missense	NM_001277115	c.6817G>A	p.V2273I	rs772793348	1.7968e-05	6e-05	0.0222284	1	0
DNAH11	7	21750319	A	G	Missense	NM_001277115	c.6832A>G	p.K2278E			0	0.325652	1	0
DNAH11	7	21751355	G	T	Missense	NM_001277115	c.6860G>T	p.R2287L	rs781049702	3.18532e-05	0	0.437039	0	2
DNAH11	7	21751355	G	A	Missense	NM_001277115	c.6860G>A	p.R2287H	rs781049702	1.07029e-05	9e-06	0.283882	1	0
DNAH11	7	21751411	G	A	Missense	NM_001277115	c.6916G>A	p.A2306T	rs200223750	2.81122e-05	0.00013	0.209622	0	3
DNAH11	7	21751417	C	G	Missense	NM_001277115	c.6922C>G	p.P2308A	rs373358447	1.78307e-05	1.8e-05	0.342718	0	1
DNAH11	7	21751418	C	T	Missense	NM_001277115	c.6923C>T	p.P2308L	rs376475480	2.00818e-05	3.6e-05	0.459555	0	1
DNAH11	7	21751441	A	G	Missense	NM_001277115	c.6946A>G	p.I2316V			0	-0.0293948	0	1
DNAH11	7	21757458	T	C	Missense	NM_001277115	c.7049T>C	p.F2350S			0	0.228188	0	2
DNAH11	7	21757464	A	T	Missense	NM_001277115	c.7055A>T	p.K2352I	rs769003282	1.20398e-05	2.7e-05	-0.0180095	1	0
DNAH11	7	21757524	C	G	Missense	NM_001277115	c.7115C>G	p.P2372R	rs1428341575	4.01978e-06	9e-06	-0.0572416	0	1
DNAH11	7	21775289	G	C	Missense	NM_001277115	c.7472G>C	p.R2491P	rs369438218	0.000108299	0.00025	0.0159713	1	2
DNAH11	7	21775367	C	G	Missense	NM_001277115	c.7550C>G	p.T2517R			0	0.19338	1	0
DNAH11	7	21775448	C	T	Missense	NM_001277115	c.7631C>T	p.S2544F	rs567433822	8.10721e-06	6e-05	0.0152667	2	0
DNAH11	7	21778333	C	A	Missense	NM_001277115	c.7660C>A	p.P2554T	rs1364610167	1.02275e-05	0	-0.0154714	1	0
DNAH11	7	21778334	C	G	Missense	NM_001277115	c.7661C>G	p.P2554R			0	0.0541456	1	0
DNAH11	7	21778399	G	A	Missense	NM_001277115	c.7726G>A	p.D2576N			0	0.0193371	0	1
DNAH11	7	21778445	C	T	Missense	NM_001277115	c.7772C>T	p.P2591L			0	0.0959158	1	0
DNAH11	7	21778459	C	T	Missense	NM_001277115	c.7786C>T	p.R2596W	rs770163877	4.23905e-06	0	0.0819924	1	0
DNAH11	7	21781549	A	G	Missense	NM_001277115	c.7919A>G	p.H2640R			0	0.151609	1	0
DNAH11	7	21781552	T	C	Missense	NM_001277115	c.7922T>C	p.F2641S	rs751907726	1.20529e-05	2.7e-05	0.26742	0	2
DNAH11	7	21781575	C	T	Missense	NM_001277115	c.7945C>T	p.P2649S			0	0.137686	2	0
DNAH11	7	21781728	A	G	Missense	NM_001277115	c.8098A>G	p.T2700A	rs376421903	8.03232e-06	1.8e-05	0.015518	0	1
DNAH11	7	21784121	T	A	Missense	NM_001277115	c.8220T>A	p.H2740Q			0	0.116801	1	0
DNAH11	7	21784135	T	A	Missense	NM_001277115	c.8234T>A	p.V2745D	rs758449343	4.01661e-06	9e-06	0.262997	0	1
DNAH11	7	21784519	C	T	Missense	NM_001277115	c.8348C>T	p.P2783L			0	-0.0293948	0	1
DNAH11	7	21788211	C	G	Missense	NM_001277115	c.8524C>G	p.R2842G			0	0.304767	1	0
DNAH11	7	21788245	T	G	Missense	NM_001277115	c.8558T>G	p.L2853W			0	0.262997	1	0
DNAH11	7	21788259	G	A	Missense	NM_001277115	c.8572G>A	p.G2858S	rs201501951	0.000240124	0.00047	0.115364	4	6
DNAH11	7	21788292	G	C	Missense	NM_001277115	c.8605G>C	p.A2869P			0	0.311729	0	1
DNAH11	7	21789369	A	G	Missense	NM_001277115	c.8747A>G	p.Q2916R			0	-0.0502799	0	1
DNAH11	7	21789380	G	A	Missense	NM_001277115	c.8758G>A	p.E2920K	rs755190539	1.60581e-05	3.6e-05	0.11147	1	0
DNAH11	7	21789395	C	A	Missense	NM_001277115	c.8773C>A	p.L2925M	rs747440745	4.0161e-06	9e-06	-0.0154714	1	0
DNAH11	7	21789851	G	T	Missense	NM_001277115	c.8809G>T	p.D2937Y	rs538735006	4.28027e-06	9.6e-06	0.172495	1	0
DNAH11	7	21789882	T	C	Missense	NM_001277115	c.8840T>C	p.I2947T	rs371902496	4.25724e-06	0	0.158571	1	0
DNAH11	7	21805110	T	G	Missense	NM_001277115	c.9005T>G	p.I3002R			0	0.0541456	1	0
DNAH11	7	21805158	C	T	Missense	NM_001277115	c.9053C>T	p.A3018V	rs1308865734	4.01929e-06	0	0.137686	1	0
DNAH11	7	21813407	C	G	Missense	NM_001277115	c.9126C>G	p.S3042R			0	0.0611073	0	1
DNAH11	7	21813415	T	C	Missense	NM_001277115	c.9134T>C	p.M3045T			0	0.0959158	0	1
DNAH11	7	21813573	C	T	Missense	NM_001277115	c.9292C>T	p.R3098C	rs769695221	1.72545e-05	0	0.102878	1	1
DNAH11	7	21818673	C	T	Missense	NM_001277115	c.9434C>T	p.T3145M	rs185195859	2.01118e-05	9e-05	-0.00686884	0	1
DNAH11	7	21818673	C	A	Missense	NM_001277115	c.9434C>A	p.T3145K	rs185195859	8.04473e-06	5.8e-05	-0.0357496	0	1
DNAH11	7	21826305	G	T	Missense	NM_001277115	c.9661G>T	p.A3221S			0	0.0889541	1	0
DNAH11	7	21826324	C	A	Missense	NM_001277115	c.9680C>A	p.A3227D			0	0.158571	0	2
DNAH11	7	21826338	G	A	Missense	NM_001277115	c.9694G>A	p.V3232M	rs760719783	6.02511e-05	9e-06	-0.0154714	2	0
DNAH11	7	21826339	T	G	Missense	NM_001277115	c.9695T>G	p.V3232G	rs766394490	6.02535e-05	9e-06	0.068069	2	0
DNAH11	7	21826346	A	C	Missense	NM_001277115	c.9702A>C	p.K3234N			0	-0.0502799	1	0
DNAH11	7	21826378	T	C	Missense	NM_001277115	c.9734T>C	p.M3245T			0	0.304767	0	1
DNAH11	7	21827042	A	T	Missense	NM_001277115	c.9765A>T	p.L3255F	rs1454925258	4.09343e-06	9.1e-06	0.23515	1	0
DNAH11	7	21827067	C	G	Missense	NM_001277115	c.9790C>G	p.P3264A	rs571709285	7.15088e-06	9e-06	-0.0224331	2	2
DNAH11	7	21827136	C	G	Missense	NM_001277115	c.9859C>G	p.R3287G	rs767943346	4.02236e-06	0	0.116801	1	0
DNAH11	7	21827161	G	A	Missense	NM_001277115	c.9884G>A	p.G3295D	rs554507939	4.29892e-05	9.9e-05	0.231982	1	0
DNAH11	7	21827194	T	G	Missense	NM_001277115	c.9917T>G	p.F3306C	rs1224736335	8.21753e-06	9.1e-06	0.242112	0	1
DNAH11	7	21828923	C	T	Missense	NM_001277115	c.9989C>T	p.A3330V			0	0.0959158	1	0
DNAH11	7	21840791	T	C	Missense	NM_001277115	c.10063T>C	p.F3355L			0	-0.00154796	1	0
DNAH11	7	21840861	T	C	Missense	NM_001277115	c.10133T>C	p.L3378S	rs372517354	4.02097e-06	9e-06	0.130724	0	1
DNAH11	7	21840870	G	C	Missense	NM_001277115	c.10142G>C	p.R3381T			0	0.0541456	0	1
DNAH11	7	21840890	G	A	Missense	NM_001277115	c.10162G>A	p.A3388T			0	-0.0502799	1	0
DNAH11	7	21847516	G	A	Missense	NM_001277115	c.10181G>A	p.G3394D			0	-0.0433182	1	0
DNAH11	7	21847576	C	A	Missense	NM_001277115	c.10241C>A	p.T3414K			0	0.0959158	1	0
DNAH11	7	21847587	G	T	Missense	NM_001277115	c.10252G>T	p.V3418L	rs771057807	8.16193e-06	0	0.0402222	1	1
DNAH11	7	21847594	A	C	Missense	NM_001277115	c.10259A>C	p.Y3420S			0	0.353499	0	1
DNAH11	7	21847609	C	A	Missense	NM_001277115	c.10274C>A	p.T3425K	rs367800491	2.21084e-05	5.6e-05	-0.017309	2	0
DNAH11	7	21847620	C	A	Missense	NM_001277115	c.10285C>A	p.R3429S			0	0.374384	1	0
DNAH11	7	21856179	A	G	Missense	NM_001277115	c.10427A>G	p.D3476G			0	0.304767	0	1
DNAH11	7	21856193	G	A	Missense	NM_001277115	c.10441G>A	p.E3481K	rs727502969	3.62427e-05	6.6e-05	0.0108808	0	1
DNAH11	7	21856223	C	T	Missense	NM_001277115	c.10471C>T	p.R3491C	rs1162504533	7.13781e-06	5.8e-05	0.117408	1	0
DNAH11	7	21856224	G	T	Missense	NM_001277115	c.10472G>T	p.R3491L			0	0.262997	1	0
DNAH11	7	21857857	G	A	Missense	NM_001277115	c.10591G>A	p.A3531T	rs1045314694	4.03424e-06	9e-06	0.109839	1	1
DNAH11	7	21857879	T	C	Missense	NM_001277115	c.10613T>C	p.I3538T			0	-0.00154796	0	1
DNAH11	7	21857888	A	G	Missense	NM_001277115	c.10622A>G	p.E3541G			0	0.116801	0	3
DNAH11	7	21892218	C	T	Missense	NM_001277115	c.11030C>T	p.T3677I			0	-0.0154714	1	0
DNAH11	7	21893976	G	A	Missense	NM_001277115	c.11105G>A	p.R3702Q	rs774855826	1.60725e-05	5.8e-05	0.0269057	1	0
DNAH11	7	21893981	T	C	Missense	NM_001277115	c.11110T>C	p.C3704R	rs760659930	1.78346e-05	2.7e-05	-0.0388946	1	0
DNAH11	7	21894048	A	T	Missense	NM_001277115	c.11177A>T	p.N3726I			0	0.151609	1	0
DNAH11	7	21901489	C	T	Missense	NM_001277115	c.11221C>T	p.H3741Y			0	-0.0293948	0	1
DNAH11	7	21901534	C	T	Missense	NM_001277115	c.11266C>T	p.R3756C	rs766141716	3.22082e-05	0.00018	-0.0219456	0	0
DNAH11	7	21904158	G	T	Missense	NM_001277115	c.11379G>T	p.L3793F	rs1199865481	4.05502e-06	9e-06	0.0123754	0	1
DNAH11	7	21904243	T	G	Missense	NM_001277115	c.11464T>G	p.F3822V	rs771110734	8.18357e-06	1.8e-05	0.0503265	1	0
DNAH11	7	21906245	G	T	Missense	NM_001277115	c.11654G>T	p.R3885I	rs772385542	8.04311e-06	2.7e-05	0.114263	1	0
DNAH11	7	21906269	C	A	Missense	NM_001277115	c.11678C>A	p.T3893K	rs763843747	8.10688e-06	1.8e-05	0.0642499	1	0
DNAH11	7	21907481	T	G	Missense	NM_001277115	c.11695T>G	p.F3899V	rs751430515	3.24627e-05	8e-05	0.0186189	1	1
DNAH11	7	21908500	C	A	Missense	NM_001277115	c.11858C>A	p.T3953K			0	0.00541374	0	1
DNAH11	7	21913080	G	C	Missense	NM_001277115	c.12156G>C	p.M4052I			0	-0.0502799	0	1
DNAH11	7	21920327	T	C	Missense	NM_001277115	c.12203T>C	p.L4068P			0	0.19338	1	0
DNAH11	7	21920351	A	T	Missense	NM_001277115	c.12227A>T	p.E4076V			0	0.0402222	1	0
DNAH11	7	21920371	T	C	Missense	NM_001277115	c.12247T>C	p.S4083P			0	0.0402222	1	0
DNAH11	7	21920390	C	G	Missense	NM_001277115	c.12266C>G	p.A4089G			0	-0.0433182	0	1
DNAH11	7	21920441	A	G	Missense	NM_001277115	c.12317A>G	p.Y4106C	rs763870754	8.02755e-06	1.8e-05	0.238292	1	0
DNAH11	7	21932083	C	T	Missense	NM_001277115	c.12548C>T	p.P4183L	rs746934962	1.2067e-05	1.8e-05	0.0642499	2	0
DNAH11	7	21934338	T	C	Missense	NM_001277115	c.12848T>C	p.L4283P	rs373110271	6.07494e-05	0.00013	-0.0061904	1	0
DNAH11	7	21934347	T	G	Missense	NM_001277115	c.12857T>G	p.F4286C			0	0.0402222	0	1
DNAH11	7	21934397	C	G	Missense	NM_001277115	c.12907C>G	p.L4303V			0	-0.0502799	0	2
DNAH11	7	21939016	C	T	Missense	NM_001277115	c.13112C>T	p.P4371L	rs1238638659	7.13038e-06	9e-06	0.109839	0	1
DNAH11	7	21939024	G	A	Missense	NM_001277115	c.13120G>A	p.V4374M	rs560018723	3.18512e-05	0	-0.0363565	1	0
DNAH11	7	21939619	G	T	Missense	NM_001277115	c.13184G>T	p.R4395L	rs368249392	1.60654e-05	1.8e-05	0.140829	4	3
DNAH11	7	21939661	A	C	Missense	NM_001277115	c.13226A>C	p.D4409A			0	0.0332605	1	0
DNAH11	7	21939724	G	A	Missense	NM_001277115	c.13289G>A	p.G4430E			0	0.290843	1	0
DNAH11	7	21940627	G	A	Missense	NM_001277115	c.13306G>A	p.A4436T	rs370565524	2.66764e-05	0.00013	0.007733	0	1
DNAH11	7	21940733	A	T	Missense	NM_001277115	c.13412A>T	p.E4471V			0	-0.0502799	1	0
DNAH11	7	21940754	G	A	Missense	NM_001277115	c.13433G>A	p.C4478Y			0	0.123763	0	1
DNAH11	7	21940778	G	A	Missense	NM_001277115	c.13457G>A	p.R4486K	rs376735165	4.03463e-06	9.1e-06	0.068069	1	1
DNAH11	7	21940803	C	G	Missense	NM_001277115	c.13482C>G	p.F4494L			0	-0.0572416	0	1
DNAH11	7	21940846	G	A	Missense	NM_001277115	c.13525G>A	p.G4509R	rs200188283	1.22061e-05	0	0.214265	0	1
DNAH11	7	21940859	T	C	Missense	NM_001277115	c.13538T>C	p.L4513P			0	0.179456	0	1
DNAH8	6	38697712	G	T	Missense	NM_001206927	c.560G>T	p.G187V			0	0.200341	1	0
DNAH8	6	38702336	G	C	Missense	NM_001206927	c.697G>C	p.G233R			0	0.0750307	1	0
DNAH8	6	38702357	C	T	Missense	NM_001206927	c.718C>T	p.R240C			0.00013	0.0982351	1	1
DNAH8	6	38702358	G	A	Missense	NM_001206927	c.719G>A	p.R240H			6e-05	0.0709603	2	0
DNAH8	6	38704865	A	G	Missense	NM_001206927	c.785A>G	p.D262G			0	0.221226	1	0
DNAH8	6	38704921	C	A	Missense	NM_001206927	c.841C>A	p.P281T			0	0.123763	1	0
DNAH8	6	38705708	T	C	Missense	NM_001206927	c.1076T>C	p.L359P			0	0.332614	0	1
DNAH8	6	38709535	C	A	Missense	NM_001206927	c.1165C>A	p.P389T			9e-06	0.27692	0	1
DNAH8	6	38723793	A	G	Missense	NM_001206927	c.1453A>G	p.M485V			7.2e-05	0.126614	1	0
DNAH8	6	38729485	A	T	Missense	NM_001206927	c.1523A>T	p.N508I			0	0.179456	0	1
DNAH8	6	38738273	T	G	Missense	NM_001206927	c.1702T>G	p.F568V			0	0.179456	0	1
DNAH8	6	38747764	T	C	Missense	NM_001206927	c.2062T>C	p.C688R			3.6e-05	0.139317	1	0
DNAH8	6	38747789	C	A	Missense	NM_001206927	c.2087C>A	p.T696K			0	0.0750307	1	0
DNAH8	6	38747836	A	G	Missense	NM_001206927	c.2134A>G	p.K712E			0	0.0889541	0	1
DNAH8	6	38749058	C	T	Missense	NM_001206927	c.2168C>T	p.P723L			3e-05	0.100883	1	0
DNAH8	6	38749061	T	C	Missense	NM_001206927	c.2171T>C	p.L724P			0	0.165533	1	0
DNAH8	6	38749099	T	A	Missense	NM_001206927	c.2209T>A	p.W737R			0	0.402231	0	1
DNAH8	6	38749120	C	T	Missense	NM_001206927	c.2230C>T	p.R744W			5.4e-05	0.230718	1	1
DNAH8	6	38750811	G	A	Missense	NM_001206927	c.2291G>A	p.G764D			5.4e-05	0.070599	1	0
DNAH8	6	38750874	A	G	Missense	NM_001206927	c.2354A>G	p.Y785C			3.6e-05	0.167164	1	0
DNAH8	6	38750887	G	T	Missense	NM_001206927	c.2367G>T	p.W789C			0	0.541465	0	1
DNAH8	6	38754639	A	G	Missense	NM_001206927	c.2494A>G	p.M832V			0	0.109839	0	1
DNAH8	6	38810164	A	C	Missense	NM_001206927	c.4487A>C	p.Q1496P			6.6e-05	0.108345	2	0
DNAH8	6	38810501	T	C	Missense	NM_001206927	c.4667T>C	p.I1556T			0	0.381346	1	0
DNAH8	6	38810534	A	C	Missense	NM_001206927	c.4700A>C	p.E1567A			0	0.207303	1	0
DNAH8	6	38810569	T	A	Missense	NM_001206927	c.4735T>A	p.W1579R			0	0.388307	0	0
DNAH8	6	38810612	A	G	Missense	NM_001206927	c.4778A>G	p.E1593G			0	0.0819924	0	1
DNAH8	6	38810657	T	G	Missense	NM_001206927	c.4823T>G	p.L1608R			9.8e-05	0.0794863	0	2
DNAH8	6	38810669	A	G	Missense	NM_001206927	c.4835A>G	p.D1612G			9e-06	0.0750307	1	1
DNAH8	6	38813448	T	G	Missense	NM_001206927	c.4944T>G	p.F1648L			0	0.137686	1	0
DNAH8	6	38813516	G	T	Missense	NM_001206927	c.5012G>T	p.S1671I			0	0.353499	1	0
DNAH8	6	38818058	C	T	Missense	NM_001206927	c.5231C>T	p.S1744F			0	0.23515	1	0
DNAH8	6	38819356	A	G	Missense	NM_001206927	c.5372A>G	p.E1791G			0	0.367422	1	0
DNAH8	6	38819427	G	C	Missense	NM_001206927	c.5443G>C	p.A1815P			0	0.311729	0	1
DNAH8	6	38820492	A	C	Missense	NM_001206927	c.5489A>C	p.D1830A			0	0.283882	0	1
DNAH8	6	38820494	A	G	Missense	NM_001206927	c.5491A>G	p.N1831D			9e-06	0.0889541	1	0
DNAH8	6	38820531	A	G	Missense	NM_001206927	c.5528A>G	p.D1843G			6.5e-05	0.150546	4	1
DNAH8	6	38820986	G	C	Missense	NM_001206927	c.5596G>C	p.G1866R			0	0.262997	0	1
DNAH8	6	38820993	T	G	Missense	NM_001206927	c.5603T>G	p.V1868G			0.00033	0.182257	5	6
DNAH8	6	38825377	G	A	Missense	NM_001206927	c.5817G>A	p.M1939I			0	0.144648	1	0
DNAH8	6	38825387	A	T	Missense	NM_001206927	c.5827A>T	p.N1943Y			0	0.179456	0	1
DNAH8	6	38825488	T	G	Missense	NM_001206927	c.5928T>G	p.H1976Q			0	0.172495	0	1
DNAH8	6	38828378	G	A	Missense	NM_001206927	c.6104G>A	p.R2035H			9.6e-05	0.0807926	1	1
DNAH8	6	38830056	A	T	Missense	NM_001206927	c.6132A>T	p.R2044S			0	0.158571	1	0
DNAH8	6	38831697	T	C	Missense	NM_001206927	c.6359T>C	p.I2120T			0	0.249073	0	1
DNAH8	6	38831792	G	T	Missense	NM_001206927	c.6454G>T	p.D2152Y			0	0.228188	0	1
DNAH8	6	38834575	G	C	Missense	NM_001206927	c.6616G>C	p.G2206R			9e-06	0.269958	1	0
DNAH8	6	38835845	A	G	Missense	NM_001206927	c.6701A>G	p.Y2234C			0	0.256035	1	0
DNAH8	6	38835922	G	A	Missense	NM_001206927	c.6778G>A	p.E2260K			4.5e-05	0.234836	0	2
DNAH8	6	38838199	T	C	Missense	NM_001206927	c.6851T>C	p.F2284S			2.7e-05	0.239573	1	1
DNAH8	6	38838241	A	T	Missense	NM_001206927	c.6893A>T	p.D2298V			0	0.228188	1	0
DNAH8	6	38840336	C	T	Missense	NM_001206927	c.7015C>T	p.H2339Y			5.4e-05	0.168063	0	2
DNAH8	6	38840435	A	G	Missense	NM_001206927	c.7114A>G	p.M2372V			0.00012	0.0989081	2	0
DNAH8	6	38840724	T	C	Missense	NM_001206927	c.7280T>C	p.I2427T			0	0.430077	1	0
DNAH8	6	38840790	G	T	Missense	NM_001206927	c.7346G>T	p.R2449L			9e-06	0.471848	1	0
DNAH8	6	38840813	A	C	Missense	NM_001206927	c.7369A>C	p.K2457Q			0	0.283882	1	0
DNAH8	6	38840858	A	G	Missense	NM_001206927	c.7414A>G	p.T2472A			0	0.52058	1	0
DNAH8	6	38843468	T	A	Missense	NM_001206927	c.7722T>A	p.S2574R			9e-06	0.214265	0	2
DNAH8	6	38843548	C	T	Missense	NM_001206927	c.7802C>T	p.P2601L			2.7e-05	0.14211	1	1
DNAH8	6	38854669	G	A	Missense	NM_001206927	c.8362G>A	p.A2788T			9e-06	0.200341	1	0
DNAH8	6	38854711	C	T	Missense	NM_001206927	c.8404C>T	p.R2802C			3.2e-05	0.223417	1	0
DNAH8	6	38862495	C	T	Missense	NM_001206927	c.8602C>T	p.P2868S			0	0.144648	1	0
DNAH8	6	38862518	C	G	Missense	NM_001206927	c.8625C>G	p.F2875L			2.7e-05	0.204765	0	3
DNAH8	6	38863913	A	G	Missense	NM_001206927	c.8852A>G	p.Y2951C			2.7e-05	0.14211	0	1
DNAH8	6	38863922	A	C	Missense	NM_001206927	c.8861A>C	p.D2954A			0	0.0889541	1	1
DNAH8	6	38863951	G	A	Missense	NM_001206927	c.8890G>A	p.G2964S			0	0.0750307	0	1
DNAH8	6	38866136	G	C	Missense	NM_001206927	c.9043G>C	p.A3015P			0	0.332614	1	0
DNAH8	6	38866136	G	A	Missense	NM_001206927	c.9043G>A	p.A3015T			0	0.207303	0	1
DNAH8	6	38874032	C	T	Missense	NM_001206927	c.9197C>T	p.S3066F			9.2e-06	0.214265	1	0
DNAH8	6	38874154	T	A	Missense	NM_001206927	c.9319T>A	p.Y3107N			5.9e-05	0.11509	0	0
DNAH8	6	38874168	G	T	Missense	NM_001206927	c.9333G>T	p.L3111F			0	0.102878	0	1
DNAH8	6	38874168	G	C	Missense	NM_001206927	c.9333G>C	p.L3111F			0	0.102878	1	1
DNAH8	6	38875732	A	T	Missense	NM_001206927	c.9349A>T	p.I3117F			0	0.304767	0	1
DNAH8	6	38875763	A	G	Missense	NM_001206927	c.9380A>G	p.D3127G			0	0.214265	1	0
DNAH8	6	38877381	G	A	Missense	NM_001206927	c.9601G>A	p.E3201K			7.2e-05	0.147499	1	2
DNAH8	6	38879252	G	A	Missense	NM_001206927	c.9749G>A	p.R3250Q			1.8e-05	0.196522	1	0
DNAH8	6	38879281	C	T	Missense	NM_001206927	c.9778C>T	p.L3260F			3e-05	0.142653	2	0
DNAH8	6	38879296	G	T	Missense	NM_001206927	c.9793G>T	p.G3265C			0	0.23515	0	1
DNAH8	6	38879312	A	G	Missense	NM_001206927	c.9809A>G	p.Y3270C			0	0.297805	0	1
DNAH8	6	38881670	C	T	Missense	NM_001206927	c.9905C>T	p.S3302F			0	0.283882	1	0
DNAH8	6	38883068	A	G	Missense	NM_001206927	c.10055A>G	p.D3352G			0	0.186418	0	1
DNAH8	6	38885060	C	T	Missense	NM_001206927	c.10186C>T	p.P3396S			3.6e-05	0.327283	0	1
DNAH8	6	38889251	C	T	Missense	NM_001206927	c.10631C>T	p.A3544V			9e-06	0.0750307	2	1
DNAH8	6	38891771	G	T	Missense	NM_001206927	c.10795G>T	p.V3599L			6.5e-05	0.115737	5	0
DNAH8	6	38891845	G	C	Missense	NM_001206927	c.10869G>C	p.L3623F			0	0.36046	0	1
DNAH8	6	38893852	G	A	Missense	NM_001206927	c.10984G>A	p.G3662R			0	0.325652	0	1
DNAH8	6	38893886	G	A	Missense	NM_001206927	c.11018G>A	p.G3673D			0	0.332614	0	1
DNAH8	6	38893942	G	A	Missense	NM_001206927	c.11074G>A	p.G3692S			0	0.207303	0	1
DNAH8	6	38893953	G	C	Missense	NM_001206927	c.11085G>C	p.W3695C			9e-06	0.311729	1	0
DNAH8	6	38899596	G	A	Missense	NM_001206927	c.11284G>A	p.G3762S			4.2e-05	0.19857	0	1
DNAH8	6	38899654	C	T	Missense	NM_001206927	c.11342C>T	p.P3781L			2.7e-05	0.0794543	0	1
DNAH8	6	38903385	G	T	Missense	NM_001206927	c.11475G>T	p.R3825S			0	0.221226	1	0
DNAH8	6	38905896	C	T	Missense	NM_001206927	c.11710C>T	p.R3904C			0	0.430077	2	0
DNAH8	6	38905897	G	A	Missense	NM_001206927	c.11711G>A	p.R3904H			3e-05	0.351504	1	0
DNAH8	6	38905915	T	A	Missense	NM_001206927	c.11729T>A	p.F3910Y			3.6e-05	0.188049	2	0
DNAH8	6	38913303	T	C	Missense	NM_001206927	c.12068T>C	p.M4023T			0	0.151609	2	0
DNAH8	6	38919105	C	T	Missense	NM_001206927	c.12260C>T	p.P4087L			0	0.165533	1	0
DNAH8	6	38919218	A	G	Missense	NM_001206927	c.12373A>G	p.T4125A			2.7e-05	0.114263	1	1
DNAH8	6	38919234	T	C	Missense	NM_001206927	c.12389T>C	p.F4130S			0	0.123763	0	1
DNAH8	6	38939398	A	G	Missense	NM_001206927	c.12482A>G	p.Q4161R			9.1e-06	0.123763	1	0
DNAH8	6	38941582	T	G	Missense	NM_001206927	c.12671T>G	p.L4224W			9.4e-06	0.256035	0	1
DNAH8	6	38942172	A	G	Missense	NM_001206927	c.12701A>G	p.E4234G			1.8e-05	0.266139	1	1
DNAH8	6	38942189	C	T	Missense	NM_001206927	c.12718C>T	p.R4240C			3.2e-05	0.139876	0	1
DNAH8	6	38942208	C	T	Missense	NM_001206927	c.12737C>T	p.T4246I			0	0.200341	1	1
DNAH8	6	38950129	G	A	Missense	NM_001206927	c.12842G>A	p.R4281Q			5.8e-05	0.117408	1	0
DNAH8	6	38950165	A	G	Missense	NM_001206927	c.12878A>G	p.E4293G			0	0.214265	1	0
DNAH8	6	38950214	C	A	Missense	NM_001206927	c.12927C>A	p.H4309Q			0	0.186418	1	0
DNAH8	6	38952037	G	A	Missense	NM_001206927	c.13007G>A	p.R4336K			1.8e-05	0.0712116	1	2
DNAH8	6	38976607	C	A	Missense	NM_001206927	c.13232C>A	p.A4411D			3e-05	0.156576	0	1
DNAH8	6	38980004	T	G	Missense	NM_001206927	c.13385T>G	p.L4462W			0	0.0889541	1	0
DNAH8	6	38980088	G	T	Missense	NM_001206927	c.13469G>T	p.R4490L			0	0.221226	0	1
DNAH8	6	38980240	T	C	Missense	NM_001206927	c.13541T>C	p.L4514P			2.7e-05	0.211727	0	1
DNAH8	6	38980390	T	C	Missense	NM_001206927	c.13691T>C	p.M4564T			1.8e-05	0.196522	2	2
DNAH8	6	38994333	G	C	Missense	NM_001206927	c.13726G>C	p.A4576P			2.7e-05	0.232612	1	0
DNAH8	6	38994355	G	A	Missense	NM_001206927	c.13748G>A	p.R4583H			6e-05	0.0988071	1	0
DNAJC11	1	6697549	C	T	Missense	NM_018198	c.1339G>A	p.E447K			0	0.207303	1	0
DNAJC11	1	6700043	T	C	Missense	NM_018198	c.1172A>G	p.Y391C			3e-05	0.1705	0	1
DNAJC11	1	6704720	C	T	Missense	NM_018198	c.995G>A	p.G332E			0	0.221226	1	0
DNAJC11	1	6705153	A	G	Missense	NM_018198	c.928T>C	p.Y310H			0	0.242112	0	1
DNAJC11	1	6705955	T	G	Missense	NM_018198	c.788A>C	p.D263A			0	0.256035	1	0
DNAJC11	1	6712954	C	T	Missense	NM_018198	c.565G>A	p.G189R			0	0.269958	0	1
DNAJC11	1	6727848	G	C	Missense	NM_018198	c.299C>G	p.P100R			0	0.116801	0	1
DNAJC11	1	6741067	G	A	Missense	NM_018198	c.103C>T	p.R35W			0.00029	0.102652	0	1
DUOX2	15	45386358	T	C	Missense	NM_014080	c.4637A>G	p.E1546G			0.0019	0.139262	20	17
DUOX2	15	45386361	T	C	Missense	NM_014080	c.4634A>G	p.Y1545C			9e-06	0.402231	0	1
DUOX2	15	45386418	A	G	Missense	NM_014080	c.4577T>C	p.V1526A			2.7e-05	0.343999	0	2
DUOX2	15	45386443	C	T	Missense	NM_014080	c.4552G>A	p.G1518S			0.00013	0.390627	1	1
DUOX2	15	45386865	T	C	Missense	NM_014080	c.4420A>G	p.K1474E			0.00016	0.26322	0	1
DUOX2	15	45386889	A	G	Missense	NM_014080	c.4396T>C	p.Y1466H			0	0.409192	1	0
DUOX2	15	45386889	A	C	Missense	NM_014080	c.4396T>G	p.Y1466D			9.9e-05	0.385139	0	2
DUOX2	15	45387152	G	T	Missense	NM_014080	c.4377C>A	p.D1459E			0	0.311729	1	3
DUOX2	15	45387186	T	C	Missense	NM_014080	c.4343A>G	p.H1448R			6.5e-05	0.394205	0	3
DUOX2	15	45387639	T	C	Missense	NM_014080	c.4235A>G	p.K1412R			2.7e-05	0.107301	2	2
DUOX2	15	45387733	C	G	Missense	NM_014080	c.4141G>C	p.V1381L			0	0.262997	0	2
DUOX2	15	45387741	T	G	Missense	NM_014080	c.4133A>C	p.E1378A			9e-05	0.382986	1	0
DUOX2	15	45387742	C	T	Missense	NM_014080	c.4132G>A	p.E1378K			9e-06	0.464886	1	0
DUOX2	15	45387777	G	A	Missense	NM_014080	c.4097C>T	p.P1366L			0.00015	0.384794	3	1
DUOX2	15	45388124	T	C	Missense	NM_014080	c.3982A>G	p.T1328A			0	0.36046	1	0
DUOX2	15	45388141	G	A	Missense	NM_014080	c.3965C>T	p.S1322F			0	0.388307	0	1
DUOX2	15	45388166	C	T	Missense	NM_014080	c.3940G>A	p.E1314K			3.2e-05	0.425306	1	0
DUOX2	15	45388196	G	A	Missense	NM_014080	c.3910C>T	p.R1304W			0.00035	0.0967042	2	1
DUOX2	15	45388200	C	G	Missense	NM_014080	c.3906G>C	p.W1302C			9e-06	0.242112	0	1
DUOX2	15	45388233	C	A	Missense	NM_014080	c.3873G>T	p.R1291S			0	0.402231	1	0
DUOX2	15	45389514	A	T	Missense	NM_014080	c.3769T>A	p.Y1257N			1.8e-05	0.203484	0	2
DUOX2	15	45389525	G	A	Missense	NM_014080	c.3758C>T	p.P1253L			2.7e-05	0.420578	0	2
DUOX2	15	45389900	A	G	Missense	NM_014080	c.3605T>C	p.M1202T			0	0.450963	1	0
DUOX2	15	45390254	G	A	Missense	NM_014080	c.3518C>T	p.S1173F			0.00014	0.215442	2	3
DUOX2	15	45391623	C	A	Missense	NM_014080	c.3473G>T	p.S1158I			0	0.395269	0	0
DUOX2	15	45391647	T	C	Missense	NM_014080	c.3449A>G	p.Y1150C			0.00013	0.286201	1	0
DUOX2	15	45391662	T	A	Missense	NM_014080	c.3434A>T	p.H1145L			0	0.471848	1	0
DUOX2	15	45391878	C	G	Missense	NM_014080	c.3397G>C	p.A1133P			8.1e-05	0.108668	3	0
DUOX2	15	45391884	C	T	Missense	NM_014080	c.3391G>A	p.A1131T			0.00041	0.276913	5	8
DUOX2	15	45391892	C	T	Missense	NM_014080	c.3383G>A	p.R1128H			0.00046	0.242111	0	2
DUOX2	15	45391893	G	A	Missense	NM_014080	c.3382C>T	p.R1128C			1.8e-05	0.488914	2	0
DUOX2	15	45391902	C	G	Missense	NM_014080	c.3373G>C	p.D1125H			9e-06	0.423116	0	1
DUOX2	15	45391908	C	A	Missense	NM_014080	c.3367G>T	p.A1123S			1.8e-05	0.252216	0	1
DUOX2	15	45391955	G	T	Missense	NM_014080	c.3320C>A	p.T1107N			0	0.200341	1	0
DUOX2	15	45391967	C	T	Missense	NM_014080	c.3308G>A	p.R1103H			0.00013	0.314048	1	1
DUOX2	15	45391968	G	A	Missense	NM_014080	c.3307C>T	p.R1103C			0.00013	0.355818	2	0
DUOX2	15	45391981	C	A	Missense	NM_014080	c.3294G>T	p.L1098F			0	0.430077	0	1
DUOX2	15	45392015	G	A	Missense	NM_014080	c.3260C>T	p.A1087V			0.00013	0.272278	0	1
DUOX2	15	45392024	C	T	Missense	NM_014080	c.3251G>A	p.R1084Q			0.00041	0.269952	1	0
DUOX2	15	45392039	C	T	Missense	NM_014080	c.3236G>A	p.G1079D			9e-06	0.423116	0	1
DUOX2	15	45392072	G	C	Missense	NM_014080	c.3203C>G	p.P1068R			0	0.116801	1	0
DUOX2	15	45392257	G	A	Missense	NM_014080	c.3175C>T	p.R1059C			0.00039	0.182132	2	3
DUOX2	15	45392317	G	A	Missense	NM_014080	c.3115C>T	p.R1039W			6e-05	0.140577	0	1
DUOX2	15	45392334	C	T	Missense	NM_014080	c.3098G>A	p.R1033H			5.4e-05	0.300335	0	2
DUOX2	15	45392335	G	A	Missense	NM_014080	c.3097C>T	p.R1033C			6.5e-05	0.303703	1	0
DUOX2	15	45393430	G	A	Missense	NM_014080	c.2894C>T	p.S965L			0.00052	0.100976	3	0
DUOX2	15	45394110	G	A	Missense	NM_014080	c.2732C>T	p.S911L			6.5e-05	0.129661	0	1
DUOX2	15	45394177	C	T	Missense	NM_014080	c.2665G>A	p.E889K			9e-06	0.130724	2	0
DUOX2	15	45396215	A	C	Missense	NM_014080	c.2597T>G	p.M866R			0.00018	0.145135	3	1
DUOX2	15	45397854	T	C	Missense	NM_014080	c.2321A>G	p.H774R			0	0.0750307	1	0
DUOX2	15	45397870	C	G	Missense	NM_014080	c.2305G>C	p.E769Q			0	0.137686	1	0
DUOX2	15	45397885	G	A	Missense	NM_014080	c.2290C>T	p.R764W			0.005	0.0917713	1	1
DUOX2	15	45397886	C	G	Missense	NM_014080	c.2289G>C	p.Q763H			0	0.0889541	1	0
DUOX2	15	45397887	T	G	Missense	NM_014080	c.2288A>C	p.Q763P			0	0.353499	1	0
DUOX2	15	45397986	A	C	Missense	NM_014080	c.2189T>G	p.V730G			2.7e-05	0.114263	1	0
DUOX2	15	45398333	T	C	Missense	NM_014080	c.2138A>G	p.E713G			4.5e-05	0.220912	3	0
DUOX2	15	45398424	G	A	Missense	NM_014080	c.2047C>T	p.R683C			1.8e-05	0.398411	1	0
DUOX2	15	45399084	C	T	Missense	NM_014080	c.1777G>A	p.G593S			0	0.116801	1	0
DUOX2	15	45400266	C	A	Missense	NM_014080	c.1553G>T	p.W518L			6.3e-05	0.255829	1	0
DUOX2	15	45400272	C	T	Missense	NM_014080	c.1547G>A	p.R516H			0.00091	0.140347	1	0
DUOX2	15	45400273	G	A	Missense	NM_014080	c.1546C>T	p.R516C			6.3e-05	0.276714	0	2
DUOX2	15	45400290	C	T	Missense	NM_014080	c.1529G>A	p.R510Q			8.1e-05	0.1574	1	1
DUOX2	15	45400346	C	G	Missense	NM_014080	c.1473G>C	p.E491D			0	0.381346	0	0
DUOX2	15	45400404	G	T	Missense	NM_014080	c.1415C>A	p.A472D			0.00061	0.0822122	12	11
DUOX2	15	45401084	C	T	Missense	NM_014080	c.1301G>A	p.R434Q			5.8e-05	0.340182	0	1
DUOX2	15	45401091	G	A	Missense	NM_014080	c.1294C>T	p.R432C			9e-06	0.23515	0	1
DUOX2	15	45401092	T	A	Missense	NM_014080	c.1293A>T	p.Q431H			0	0.158571	1	0
DUOX2	15	45401106	C	G	Missense	NM_014080	c.1279G>C	p.A427P			1.8e-05	0.370565	0	1
DUOX2	15	45401121	G	T	Missense	NM_014080	c.1264C>A	p.R422S			0	0.367422	0	1
DUOX2	15	45401121	G	A	Missense	NM_014080	c.1264C>T	p.R422C			0.00029	0.165307	0	1
DUOX2	15	45401767	G	T	Missense	NM_014080	c.1189C>A	p.Q397K			4.5e-05	0.318376	3	0
DUOX2	15	45401770	A	G	Missense	NM_014080	c.1186T>C	p.S396P			1.8e-05	0.363603	0	1
DUOX2	15	45402093	G	A	Missense	NM_014080	c.1126C>T	p.R376W			0.00013	0.16089	1	2
DUOX2	15	45402633	A	G	Missense	NM_014080	c.1033T>C	p.Y345H			9e-06	0.269958	0	1
DUOX2	15	45402654	T	C	Missense	NM_014080	c.1012A>G	p.T338A			9e-06	0.353499	1	1
DUOX2	15	45404042	C	T	Missense	NM_014080	c.437G>A	p.G146E			9.1e-06	0.123763	1	0
DUOX2	15	45404078	G	A	Missense	NM_014080	c.401C>T	p.P134L			0.00015	0.127212	0	1
DUOX2	15	45404761	C	A	Missense	NM_014080	c.316G>T	p.V106F			1.8e-05	0.119943	0	1
DUOX2	15	45404805	C	G	Missense	NM_014080	c.272G>C	p.G91A			0	0.200341	1	0
DUOX2	15	45404868	T	C	Missense	NM_014080	c.209A>G	p.Y70C			0	0.36046	1	0
DUOX2	15	45404876	G	T	Missense	NM_014080	c.201C>A	p.D67E			1.8e-05	0.175637	0	2
DUOX2	15	45404902	G	C	Missense	NM_014080	c.175C>G	p.R59G			4.6e-05	0.358259	1	3
DUOX2	15	45405193	C	T	Missense	NM_014080	c.152G>A	p.G51D			9e-06	0.534503	0	1
DUOX2	15	45405211	A	G	Missense	NM_014080	c.134T>C	p.L45P			0.00011	0.210551	1	2
DUOX2	15	45405235	C	T	Missense	NM_014080	c.110G>A	p.R37H			0	0.214265	0	1
DYNC2H1	11	102980308	C	T	Missense	NM_001080463	c.5C>T	p.A2V			0	-0.0990118	1	0
DYNC2H1	11	102984315	G	A	Missense	NM_001080463	c.245G>A	p.R82Q			0	-0.0920501	0	1
DYNC2H1	11	102984407	C	T	Missense	NM_001080463	c.337C>T	p.R113W			4.9e-05	0.0391544	0	1
DYNC2H1	11	102984856	G	C	Missense	NM_001080463	c.391G>C	p.D131H			9.2e-05	0.0757314	1	1
DYNC2H1	11	102985912	T	G	Missense	NM_001080463	c.509T>G	p.L170R			1.9e-05	0.234961	0	1
DYNC2H1	11	102985956	C	G	Missense	NM_001080463	c.553C>G	p.R185G			0	-0.0920501	1	0
DYNC2H1	11	102985959	G	C	Missense	NM_001080463	c.556G>C	p.G186R			0	-0.071165	1	0
DYNC2H1	11	102987315	A	G	Missense	NM_001080463	c.638A>G	p.D213G			0	0.130724	0	1
DYNC2H1	11	102987398	G	C	Missense	NM_001080463	c.721G>C	p.D241H			0	-0.105973	0	1
DYNC2H1	11	102987417	G	A	Missense	NM_001080463	c.740G>A	p.R247Q			0.00013	0.209622	0	1
DYNC2H1	11	102988581	C	T	Missense	NM_001080463	c.988C>T	p.R330C			0.00013	0.167852	0	1
DYNC2H1	11	102988582	G	A	Missense	NM_001080463	c.989G>A	p.R330H			0	0.332614	1	0
DYNC2H1	11	102991207	T	A	Missense	NM_001080463	c.1031T>A	p.F344Y			0	-0.0293948	0	2
DYNC2H1	11	102991267	C	A	Missense	NM_001080463	c.1091C>A	p.P364H			0	0.172495	1	0
DYNC2H1	11	102991434	C	T	Missense	NM_001080463	c.1151C>T	p.A384V			0.00013	0.000771304	1	0
DYNC2H1	11	102991693	C	T	Missense	NM_001080463	c.1288C>T	p.R430C			0.00036	0.00505276	11	3
DYNC2H1	11	102992125	G	A	Missense	NM_001080463	c.1385G>A	p.R462Q			0.00012	-0.0820961	1	0
DYNC2H1	11	102993567	T	C	Missense	NM_001080463	c.1499T>C	p.I500T			0	-0.0502799	1	0
DYNC2H1	11	102993710	G	T	Missense	NM_001080463	c.1642G>T	p.D548Y			0	-0.00154796	0	0
DYNC2H1	11	102995899	C	G	Missense	NM_001080463	c.1732C>G	p.R578G			5.4e-05	0.154139	1	3
DYNC2H1	11	102995927	G	A	Missense	NM_001080463	c.1760G>A	p.R587H			3e-05	0.29581	0	1
DYNC2H1	11	102995941	C	T	Missense	NM_001080463	c.1774C>T	p.L592F			0.0016	-0.0157307	1	0
DYNC2H1	11	102995967	A	G	Missense	NM_001080463	c.1800A>G	p.I600M			0	0.179456	1	0
DYNC2H1	11	102995970	G	T	Missense	NM_001080463	c.1803G>T	p.Q601H			0	0.0819924	0	1
DYNC2H1	11	102995971	C	A	Missense	NM_001080463	c.1804C>A	p.Q602K			0	-0.0224331	1	0
DYNC2H1	11	102999660	A	G	Missense	NM_001080463	c.1879A>G	p.I627V			8.2e-05	-0.114561	1	0
DYNC2H1	11	102999699	T	A	Missense	NM_001080463	c.1918T>A	p.L640I			0	-0.0293948	0	1
DYNC2H1	11	102999729	A	G	Missense	NM_001080463	c.1948A>G	p.I650V			0	-0.00850966	0	1
DYNC2H1	11	103004353	A	G	Missense	NM_001080463	c.2023A>G	p.I675V			9e-06	-0.0850884	1	0
DYNC2H1	11	103004372	C	T	Missense	NM_001080463	c.2042C>T	p.A681V			0	-0.0781267	0	1
DYNC2H1	11	103004384	T	A	Missense	NM_001080463	c.2054T>A	p.L685H			0	0.23515	0	1
DYNC2H1	11	103006475	C	A	Missense	NM_001080463	c.2372C>A	p.P791H			0	0.151609	0	1
DYNC2H1	11	103006490	G	A	Missense	NM_001080463	c.2387G>A	p.R796Q			7.2e-05	-0.0613516	1	0
DYNC2H1	11	103006499	A	G	Missense	NM_001080463	c.2396A>G	p.Y799C			9e-05	0.0418631	1	0
DYNC2H1	11	103006531	C	T	Missense	NM_001080463	c.2428C>T	p.P810S			0	0.00541374	0	1
DYNC2H1	11	103006616	C	T	Missense	NM_001080463	c.2513C>T	p.T838M			5.8e-05	-0.0635964	1	0
DYNC2H1	11	103018501	T	G	Missense	NM_001080463	c.2703T>G	p.S901R			0	-0.112935	0	1
DYNC2H1	11	103018517	T	C	Missense	NM_001080463	c.2719T>C	p.C907R			0.00013	0.0982351	0	2
DYNC2H1	11	103018613	C	A	Missense	NM_001080463	c.2815C>A	p.Q939K			0	-0.112935	0	1
DYNC2H1	11	103019237	A	T	Missense	NM_001080463	c.2837A>T	p.D946V			0	-0.0572416	1	0
DYNC2H1	11	103019243	T	A	Missense	NM_001080463	c.2843T>A	p.F948Y			0	-0.0363565	1	0
DYNC2H1	11	103019308	A	T	Missense	NM_001080463	c.2908A>T	p.N970Y			9.3e-05	-0.112707	3	1
DYNC2H1	11	103019338	A	G	Missense	NM_001080463	c.2938A>G	p.K980E			0	-0.0990118	0	1
DYNC2H1	11	103022958	A	G	Missense	NM_001080463	c.3040A>G	p.K1014E			0	-0.0850884	1	0
DYNC2H1	11	103022964	G	C	Missense	NM_001080463	c.3046G>C	p.D1016H			0	0.0611073	0	2
DYNC2H1	11	103024062	C	T	Missense	NM_001080463	c.3127C>T	p.R1043C			0	-0.0572416	0	2
DYNC2H1	11	103024104	C	T	Missense	NM_001080463	c.3169C>T	p.R1057C			0.00012	-0.0403259	2	1
DYNC2H1	11	103024105	G	T	Missense	NM_001080463	c.3170G>T	p.R1057L			9.4e-05	-0.0644494	1	0
DYNC2H1	11	103025310	G	A	Missense	NM_001080463	c.3433G>A	p.A1145T			0	-0.0293948	0	1
DYNC2H1	11	103025334	C	T	Missense	NM_001080463	c.3457C>T	p.R1153W			0.0017	-0.0335617	1	3
DYNC2H1	11	103025485	G	A	Missense	NM_001080463	c.3520G>A	p.E1174K			0	-0.119897	0	1
DYNC2H1	11	103025521	G	A	Missense	NM_001080463	c.3556G>A	p.E1186K			0	0.0123754	0	3
DYNC2H1	11	103026091	G	A	Missense	NM_001080463	c.3605G>A	p.G1202E			0	0.290843	0	0
DYNC2H1	11	103026117	C	A	Missense	NM_001080463	c.3631C>A	p.L1211I			0	-0.0502799	0	2
DYNC2H1	11	103027129	C	T	Missense	NM_001080463	c.3757C>T	p.R1253W			2.7e-05	0.156033	0	1
DYNC2H1	11	103027261	G	A	Missense	NM_001080463	c.3889G>A	p.D1297N			0	-0.0363565	1	0
DYNC2H1	11	103027265	T	C	Missense	NM_001080463	c.3893T>C	p.I1298T			5.8e-05	-0.11929	0	0
DYNC2H1	11	103027330	G	A	Missense	NM_001080463	c.3958G>A	p.G1320R			0	0.0750307	1	0
DYNC2H1	11	103027393	A	G	Missense	NM_001080463	c.4021A>G	p.N1341D			0	-0.0990118	0	1
DYNC2H1	11	103027467	G	C	Missense	NM_001080463	c.4095G>C	p.Q1365H			0	-0.0224331	0	1
DYNC2H1	11	103029645	C	T	Missense	NM_001080463	c.4267C>T	p.R1423C			0.00018	0.249561	1	0
DYNC2H1	11	103031663	A	G	Missense	NM_001080463	c.4381A>G	p.I1461V			0	0.0123754	1	0
DYNC2H1	11	103031718	T	C	Missense	NM_001080463	c.4436T>C	p.L1479S			0	-0.0363565	0	1
DYNC2H1	11	103033854	A	T	Missense	NM_001080463	c.4589A>T	p.D1530V			0	0.172495	1	0
DYNC2H1	11	103039514	C	A	Missense	NM_001080463	c.4793C>A	p.A1598D			3e-05	0.226193	0	1
DYNC2H1	11	103039535	A	G	Missense	NM_001080463	c.4814A>G	p.H1605R			0	0.27692	1	0
DYNC2H1	11	103039598	G	C	Missense	NM_001080463	c.4877G>C	p.W1626S			0	0.395269	1	0
DYNC2H1	11	103039655	T	A	Missense	NM_001080463	c.4934T>A	p.V1645E			1.8e-05	0.217407	1	0
DYNC2H1	11	103040880	G	T	Missense	NM_001080463	c.5012G>T	p.C1671F			0	0.262997	1	0
DYNC2H1	11	103040897	C	A	Missense	NM_001080463	c.5029C>A	p.Q1677K			0	0.165533	1	0
DYNC2H1	11	103040907	A	C	Missense	NM_001080463	c.5039A>C	p.K1680T			0	-0.0293948	0	1
DYNC2H1	11	103040928	C	T	Missense	NM_001080463	c.5060C>T	p.P1687L			2.7e-05	0.0933777	0	1
DYNC2H1	11	103041616	G	A	Missense	NM_001080463	c.5153G>A	p.G1718D			4.3e-05	-0.0329755	1	0
DYNC2H1	11	103041643	T	C	Missense	NM_001080463	c.5180T>C	p.I1727T			0	0.23515	1	0
DYNC2H1	11	103041778	G	A	Missense	NM_001080463	c.5315G>A	p.C1772Y			6.1e-05	-0.0565955	3	0
DYNC2H1	11	103043940	A	G	Missense	NM_001080463	c.5464A>G	p.N1822D			0	-0.0990118	0	1
DYNC2H1	11	103043952	G	T	Missense	NM_001080463	c.5476G>T	p.A1826S			0	-0.0293948	0	0
DYNC2H1	11	103044797	C	A	Missense	NM_001080463	c.5572C>A	p.P1858T			0	-0.105973	1	0
DYNC2H1	11	103044854	G	A	Missense	NM_001080463	c.5629G>A	p.G1877R			0	0.27692	1	0
DYNC2H1	11	103046976	A	C	Missense	NM_001080463	c.5687A>C	p.H1896P			0	-0.0433182	0	1
DYNC2H1	11	103046987	C	A	Missense	NM_001080463	c.5698C>A	p.Q1900K			0	0.228188	1	0
DYNC2H1	11	103047038	C	T	Missense	NM_001080463	c.5749C>T	p.R1917W			0	0.430077	1	2
DYNC2H1	11	103047039	G	A	Missense	NM_001080463	c.5750G>A	p.R1917Q			0.00057	0.0304524	0	1
DYNC2H1	11	103047069	C	T	Missense	NM_001080463	c.5780C>T	p.P1927L			0.00014	0.104055	1	2
DYNC2H1	11	103047076	T	G	Missense	NM_001080463	c.5787T>G	p.I1929M			1.1e-05	0.0332605	1	0
DYNC2H1	11	103047096	A	G	Missense	NM_001080463	c.5807A>G	p.Y1936C			0	0.262997	2	0
DYNC2H1	11	103048305	G	C	Missense	NM_001080463	c.5895G>C	p.L1965F			0	0.151609	0	1
DYNC2H1	11	103048370	C	T	Missense	NM_001080463	c.5960C>T	p.T1987M			0.00026	0.0150263	0	1
DYNC2H1	11	103048445	C	T	Missense	NM_001080463	c.6035C>T	p.A2012V			9e-06	0.416154	0	1
DYNC2H1	11	103048447	A	T	Missense	NM_001080463	c.6037A>T	p.M2013L			0	0.172495	0	1
DYNC2H1	11	103048503	T	G	Missense	NM_001080463	c.6093T>G	p.D2031E			0.0017	0.00124677	1	0
DYNC2H1	11	103048525	C	T	Missense	NM_001080463	c.6115C>T	p.R2039C			1.8e-05	0.495875	1	0
DYNC2H1	11	103048537	C	T	Missense	NM_001080463	c.6127C>T	p.R2043W			0	0.23515	0	1
DYNC2H1	11	103049821	T	C	Missense	NM_001080463	c.6206T>C	p.V2069A			2.7e-05	0.302229	1	5
DYNC2H1	11	103049922	T	A	Missense	NM_001080463	c.6307T>A	p.S2103T			0	0.27692	1	8
DYNC2H1	11	103055651	G	T	Missense	NM_001080463	c.6504G>T	p.L2168F			9e-06	-0.0850884	1	0
DYNC2H1	11	103057146	G	A	Missense	NM_001080463	c.6809G>A	p.R2270Q			0	0.23515	1	0
DYNC2H1	11	103057160	T	G	Missense	NM_001080463	c.6823T>G	p.F2275V			0	-0.0990118	0	1
DYNC2H1	11	103058085	G	A	Missense	NM_001080463	c.6910G>A	p.A2304T			0	0.0889541	0	1
DYNC2H1	11	103058118	A	T	Missense	NM_001080463	c.6943A>T	p.T2315S			0	-0.119897	0	1
DYNC2H1	11	103058205	C	T	Missense	NM_001080463	c.7030C>T	p.R2344C			0.00033	-0.0962108	0	1
DYNC2H1	11	103058253	G	T	Missense	NM_001080463	c.7078G>T	p.D2360Y			0	0.297805	1	0
DYNC2H1	11	103058289	A	G	Missense	NM_001080463	c.7114A>G	p.S2372G			0	0.068069	1	0
DYNC2H1	11	103058302	C	A	Missense	NM_001080463	c.7127C>A	p.A2376E			1.8e-05	0.18956	1	0
DYNC2H1	11	103059232	A	T	Missense	NM_001080463	c.7147A>T	p.T2383S			0	0.00541374	2	0
DYNC2H1	11	103059233	C	T	Missense	NM_001080463	c.7148C>T	p.T2383M			6.6e-05	0.143153	1	0
DYNC2H1	11	103062848	T	G	Missense	NM_001080463	c.7563T>G	p.D2521E			1.6e-05	-0.0964104	1	1
DYNC2H1	11	103062868	C	T	Missense	NM_001080463	c.7583C>T	p.A2528V			0	0.0402222	0	1
DYNC2H1	11	103062882	C	T	Missense	NM_001080463	c.7597C>T	p.R2533C			0.00011	0.064355	0	1
DYNC2H1	11	103068772	C	T	Missense	NM_001080463	c.7819C>T	p.L2607F			0	-0.0433182	1	0
DYNC2H1	11	103070788	C	T	Missense	NM_001080463	c.8102C>T	p.A2701V			0	0.158571	0	0
DYNC2H1	11	103070797	A	G	Missense	NM_001080463	c.8111A>G	p.E2704G			0	0.068069	1	0
DYNC2H1	11	103070866	A	T	Missense	NM_001080463	c.8180A>T	p.N2727I			0	0.137686	0	0
DYNC2H1	11	103070876	G	T	Missense	NM_001080463	c.8190G>T	p.L2730F			0	0.116801	0	1
DYNC2H1	11	103074472	T	G	Missense	NM_001080463	c.8278T>G	p.F2760V			0	0.0611073	1	0
DYNC2H1	11	103075682	A	G	Missense	NM_001080463	c.8443A>G	p.S2815G			0	-0.0572416	1	0
DYNC2H1	11	103082529	T	A	Missense	NM_001080463	c.8551T>A	p.F2851I			0	-0.0990118	1	0
DYNC2H1	11	103082563	G	A	Missense	NM_001080463	c.8585G>A	p.C2862Y			0.00026	0.0150263	5	1
DYNC2H1	11	103082575	G	A	Missense	NM_001080463	c.8597G>A	p.G2866D			1.8e-05	0.161714	1	0
DYNC2H1	11	103082578	C	T	Missense	NM_001080463	c.8600C>T	p.A2867V			0	0.068069	0	1
DYNC2H1	11	103082583	C	T	Missense	NM_001080463	c.8605C>T	p.P2869S			0	0.0889541	1	1
DYNC2H1	11	103086535	C	G	Missense	NM_001080463	c.8780C>G	p.T2927R			0	-0.0572416	1	0
DYNC2H1	11	103086537	A	C	Missense	NM_001080463	c.8782A>C	p.K2928Q			0.00045	-0.0767068	0	3
DYNC2H1	11	103090674	A	G	Missense	NM_001080463	c.8863A>G	p.R2955G			0	-0.00850966	0	1
DYNC2H1	11	103090734	G	T	Missense	NM_001080463	c.8923G>T	p.D2975Y			0	0.0889541	0	1
DYNC2H1	11	103090737	G	C	Missense	NM_001080463	c.8926G>C	p.D2976H			0	0.0193371	1	0
DYNC2H1	11	103091397	G	A	Missense	NM_001080463	c.8992G>A	p.E2998K			0.00017	-0.109056	1	1
DYNC2H1	11	103091424	C	T	Missense	NM_001080463	c.9019C>T	p.R3007C			0	0.228188	0	3
DYNC2H1	11	103091449	A	G	Missense	NM_001080463	c.9044A>G	p.D3015G			0.0006	0.145636	5	8
DYNC2H1	11	103093704	G	A	Missense	NM_001080463	c.9242G>A	p.R3081H			0.00026	-0.0267439	1	1
DYNC2H1	11	103093716	C	T	Missense	NM_001080463	c.9254C>T	p.A3085V			0.0075	-0.0498796	0	0
DYNC2H1	11	103093724	C	T	Missense	NM_001080463	c.9262C>T	p.P3088S			8.1e-05	0.0112041	0	1
DYNC2H1	11	103102026	G	A	Missense	NM_001080463	c.9391G>A	p.E3131K			5.5e-05	0.0127397	1	1
DYNC2H1	11	103102044	G	A	Missense	NM_001080463	c.9409G>A	p.V3137I			0	-0.00850966	1	0
DYNC2H1	11	103104785	G	A	Missense	NM_001080463	c.9463G>A	p.A3155T			0.00043	-0.11568	0	1
DYNC2H1	11	103104818	C	G	Missense	NM_001080463	c.9496C>G	p.Q3166E			1.3e-05	0.0123754	1	0
DYNC2H1	11	103104824	A	G	Missense	NM_001080463	c.9502A>G	p.T3168A			0.00015	-0.102525	1	0
DYNC2H1	11	103106446	C	G	Missense	NM_001080463	c.9613C>G	p.Q3205E			0	0.0471839	1	0
DYNC2H1	11	103106453	C	G	Missense	NM_001080463	c.9620C>G	p.A3207G			0	0.0819924	0	1
DYNC2H1	11	103106488	G	A	Missense	NM_001080463	c.9655G>A	p.E3219K			0.00015	0.0227861	6	2
DYNC2H1	11	103106518	T	C	Missense	NM_001080463	c.9685T>C	p.W3229R			0	0.290843	1	0
DYNC2H1	11	103107196	G	C	Missense	NM_001080463	c.9747G>C	p.E3249D			0	-0.071165	0	1
DYNC2H1	11	103116017	G	T	Missense	NM_001080463	c.9977G>T	p.R3326L			0	0.228188	0	1
DYNC2H1	11	103116017	G	A	Missense	NM_001080463	c.9977G>A	p.R3326H			0.00018	-0.0915626	0	1
DYNC2H1	11	103124020	G	A	Missense	NM_001080463	c.10070G>A	p.R3357H			9.8e-05	0.016831	1	0
DYNC2H1	11	103124023	A	G	Missense	NM_001080463	c.10073A>G	p.Y3358C			6.5e-05	-0.065267	0	1
DYNC2H1	11	103124070	C	T	Missense	NM_001080463	c.10120C>T	p.R3374C			0.00013	0.140005	0	1
DYNC2H1	11	103124151	A	G	Missense	NM_001080463	c.10201A>G	p.T3401A			0	-0.0502799	0	1
DYNC2H1	11	103124154	A	G	Missense	NM_001080463	c.10204A>G	p.T3402A			0	0.228188	1	0
DYNC2H1	11	103126178	A	G	Missense	NM_001080463	c.10262A>G	p.D3421G			0	-0.00154796	0	1
DYNC2H1	11	103126872	A	T	Missense	NM_001080463	c.10385A>T	p.K3462M			0	-0.00850966	0	1
DYNC2H1	11	103126910	A	G	Missense	NM_001080463	c.10423A>G	p.S3475G			0	0.0889541	0	1
DYNC2H1	11	103126941	C	A	Missense	NM_001080463	c.10454C>A	p.S3485Y			0.00012	-0.0820961	0	2
DYNC2H1	11	103128340	C	T	Missense	NM_001080463	c.10486C>T	p.R3496W			0.00016	0.0682924	1	0
DYNC2H1	11	103128341	G	A	Missense	NM_001080463	c.10487G>A	p.R3496Q			6.6e-05	0.0804978	1	1
DYNC2H1	11	103128347	C	G	Missense	NM_001080463	c.10493C>G	p.A3498G			0.00018	-0.105486	0	1
DYNC2H1	11	103128424	C	T	Missense	NM_001080463	c.10570C>T	p.R3524C			6.1e-05	0.166179	1	0
DYNC2H1	11	103128425	G	A	Missense	NM_001080463	c.10571G>A	p.R3524H			0.0021	-0.118869	3	0
DYNC2H1	11	103151095	G	A	Missense	NM_001080463	c.10735G>A	p.A3579T			0	0.109839	1	1
DYNC2H1	11	103153780	A	T	Missense	NM_001080463	c.10877A>T	p.D3626V			8.1e-05	-0.100183	1	0
DYNC2H1	11	103153798	C	T	Missense	NM_001080463	c.10895C>T	p.A3632V			0	0.0402222	0	1
DYNC2H1	11	103157003	A	G	Missense	NM_001080463	c.10931A>G	p.Y3644C			9e-06	0.144648	0	2
DYNC2H1	11	103157045	A	G	Missense	NM_001080463	c.10973A>G	p.Y3658C			0	-0.0224331	0	1
DYNC2H1	11	103158299	A	G	Missense	NM_001080463	c.11081A>G	p.Q3694R			0	0.200341	0	1
DYNC2H1	11	103173923	C	G	Missense	NM_001080463	c.11218C>G	p.P3740A			0	0.186418	1	0
DYNC2H1	11	103175354	G	A	Missense	NM_001080463	c.11308G>A	p.A3770T			9e-05	0.0766716	1	1
DYNC2H1	11	103175405	A	G	Missense	NM_001080463	c.11359A>G	p.K3787E			0	0.179456	2	0
DYNC2H1	11	103178483	C	T	Missense	NM_001080463	c.11437C>T	p.R3813C			0	0.283882	0	1
DYNC2H1	11	103178534	C	G	Missense	NM_001080463	c.11488C>G	p.Q3830E			0	0.0193371	0	1
DYNC2H1	11	103178553	C	T	Missense	NM_001080463	c.11507C>T	p.T3836I			3.2e-05	0.174685	2	1
DYNC2H1	11	103178556	A	G	Missense	NM_001080463	c.11510A>G	p.Y3837C			1.1e-05	0.207303	2	1
DYNC2H1	11	103178559	A	C	Missense	NM_001080463	c.11513A>C	p.E3838A			0	0.290843	0	0
DYNC2H1	11	103182637	C	T	Missense	NM_001080463	c.11545C>T	p.R3849C			6.7e-05	0.0870272	0	1
DYNC2H1	11	103182638	G	A	Missense	NM_001080463	c.11546G>A	p.R3849H			9.1e-05	0.013547	1	0
DYNC2H1	11	103182652	T	G	Missense	NM_001080463	c.11560T>G	p.W3854G			2.7e-05	0.204765	0	1
DYNC2H1	11	103182664	C	A	Missense	NM_001080463	c.11572C>A	p.Q3858K			3e-05	-0.0313895	1	0
DYNC2H1	11	103182716	C	G	Missense	NM_001080463	c.11624C>G	p.A3875G			6.5e-05	-0.120961	2	1
DYNC2H1	11	103187313	C	T	Missense	NM_001080463	c.11710C>T	p.R3904W			0	0.172495	1	1
DYNC2H1	11	103187314	G	A	Missense	NM_001080463	c.11711G>A	p.R3904Q			0	0.0471839	1	1
DYNC2H1	11	103191820	C	T	Missense	NM_001080463	c.11809C>T	p.R3937C			0.00027	-0.0207341	1	2
DYNC2H1	11	103191827	A	C	Missense	NM_001080463	c.11816A>C	p.D3939A			0	0.256035	1	0
DYNC2H1	11	103194677	G	T	Missense	NM_001080463	c.12019G>T	p.A4007S			0	-0.0990118	1	0
DYNC2H1	11	103194701	C	T	Missense	NM_001080463	c.12043C>T	p.R4015C			0	-0.105973	0	2
DYNC2H1	11	103229040	T	G	Missense	NM_001080463	c.12130T>G	p.S4044A			1.1e-05	-0.0224331	0	1
DYNC2H1	11	103229055	C	T	Missense	NM_001080463	c.12145C>T	p.P4049S			0	0.172495	0	1
DYNC2H1	11	103270457	T	C	Missense	NM_001080463	c.12244T>C	p.F4082L			0	0.0611073	1	1
DYNC2H1	11	103270521	C	A	Missense	NM_001080463	c.12308C>A	p.A4103D			0	-0.00850966	1	0
DYNC2H1	11	103270575	T	C	Missense	NM_001080463	c.12362T>C	p.L4121S			9e-06	0.123763	0	2
DYNC2H1	11	103326007	C	T	Missense	NM_001080463	c.12571C>T	p.R4191C			6.5e-05	0.0948521	0	0
DYNC2H1	11	103339320	A	C	Missense	NM_001080463	c.12673A>C	p.S4225R			0	-0.0224331	0	1
DYNC2H1	11	103339363	T	G	Missense	NM_001080463	c.12716T>G	p.L4239R			0	0.242112	0	1
E4F1	16	2278424	T	C	Missense	NM_004424	c.209T>C	p.L70S			0	0.116801	1	0
E4F1	16	2278443	C	A	Missense	NM_004424	c.228C>A	p.H76Q			0	0.36046	1	0
E4F1	16	2282565	C	T	Missense	NM_004424	c.718C>T	p.R240W			0	0.0750307	1	0
E4F1	16	2282769	A	G	Missense	NM_004424	c.743A>G	p.Y248C			0	0.23515	0	1
E4F1	16	2285496	G	A	Missense	NM_004424	c.2278G>A	p.E760K			9.2e-06	0.116801	1	0
EAF2	3	121573595	T	A	Missense	NM_018456	c.263T>A	p.I88N			0	0.283882	1	0
EAF2	3	121573627	C	T	Missense	NM_018456	c.295C>T	p.R99W			7.4e-05	0.0839606	0	1
EAF2	3	121575994	A	T	Missense	NM_018456	c.475A>T	p.I159F			9.1e-06	0.144648	1	0
EEFSEC	3	127872434	C	G	Missense	NM_021937	c.84C>G	p.S28R			3.2e-05	0.146838	0	1
EEFSEC	3	127872441	G	C	Missense	NM_021937	c.91G>C	p.A31P			0	0.221226	0	0
EEFSEC	3	127872469	C	G	Missense	NM_021937	c.119C>G	p.P40R			0	0.130724	0	0
EEFSEC	3	127872498	G	C	Missense	NM_021937	c.148G>C	p.D50H			0	0.130724	1	0
EEFSEC	3	127872616	C	G	Missense	NM_021937	c.266C>G	p.T89R			0.00074	0.134453	9	6
EEFSEC	3	127965789	G	A	Missense	NM_021937	c.427G>A	p.V143M			8.9e-05	0.279028	0	1
EEFSEC	3	127965871	C	G	Missense	NM_021937	c.509C>G	p.T170S			0	0.0889541	1	0
EEFSEC	3	127980996	G	A	Missense	NM_021937	c.550G>A	p.V184M			2.7e-05	0.197803	0	1
EEFSEC	3	127981002	G	A	Missense	NM_021937	c.556G>A	p.A186T			5.8e-05	0.312335	1	0
EEFSEC	3	127981015	G	C	Missense	NM_021937	c.569G>C	p.G190A			0	0.158571	0	1
EEFSEC	3	127981063	T	C	Missense	NM_021937	c.617T>C	p.I206T			3e-05	0.267964	1	0
EEFSEC	3	127983545	G	T	Missense	NM_021937	c.707G>T	p.G236V			9e-06	0.332614	1	0
EEFSEC	3	128060188	G	A	Missense	NM_021937	c.899G>A	p.R300H			9e-06	0.395269	0	1
EEFSEC	3	128060190	G	A	Missense	NM_021937	c.901G>A	p.G301R			0.00012	0.245104	1	1
EEFSEC	3	128060196	G	A	Missense	NM_021937	c.907G>A	p.V303M			9e-06	0.102878	1	0
EEFSEC	3	128060680	T	G	Missense	NM_021937	c.1391T>G	p.L464R			0	0.325652	0	1
EEFSEC	3	128060698	A	G	Missense	NM_021937	c.1409A>G	p.Y470C			0	0.0889541	0	1
EEFSEC	3	128077084	G	A	Missense	NM_021937	c.1468G>A	p.G490S			3e-05	0.073036	0	1
EFCAB5	17	28378146	T	C	Missense	NM_198529	c.1211T>C	p.L404S			9.9e-05	0.0788245	0	1
EFCAB5	17	28378157	A	T	Missense	NM_198529	c.1222A>T	p.R408W			0	0.144648	1	0
EFCAB5	17	28384798	G	A	Missense	NM_198529	c.2470G>A	p.E824K			0	0.116801	0	1
EFCAB5	17	28384804	T	C	Missense	NM_198529	c.2476T>C	p.F826L			0	0.249073	1	0
EFCAB5	17	28407123	G	A	Missense	NM_198529	c.3061G>A	p.A1021T			9e-06	0.102878	0	1
EFCAB5	17	28407243	G	C	Missense	NM_198529	c.3181G>C	p.D1061H			9.7e-06	0.19338	1	0
EFCAB5	17	28407892	C	A	Missense	NM_198529	c.3319C>A	p.P1107T			0	0.388307	1	0
EFCAB5	17	28407905	C	A	Missense	NM_198529	c.3332C>A	p.A1111E			0	0.0750307	0	1
EFCAB5	17	28409912	G	T	Missense	NM_198529	c.3430G>T	p.V1144F			0	0.172495	0	1
EFCAB5	17	28417447	T	C	Missense	NM_198529	c.3692T>C	p.L1231P			9e-06	0.242112	0	1
EFCAB5	17	28434913	G	C	Missense	NM_198529	c.4383G>C	p.W1461C			0	0.200341	3	0
EGFR	7	55210006	C	T	Missense	NM_005228	c.116C>T	p.T39M			5.8e-05	0.0477908	0	1
EGFR	7	55210077	G	A	Missense	NM_005228	c.187G>A	p.G63R			0	0.457924	0	1
EGFR	7	55219001	C	A	Missense	NM_005228	c.574C>A	p.P192T			9e-06	0.0471839	1	0
EGFR	7	55219019	A	G	Missense	NM_005228	c.592A>G	p.S198G			0	0.0541456	0	1
EGFR	7	55221710	C	G	Missense	NM_005228	c.754C>G	p.R252G			9e-06	0.19338	1	0
EGFR	7	55221731	A	C	Missense	NM_005228	c.775A>C	p.T259P			9e-06	0.200341	0	1
EGFR	7	55221825	C	T	Missense	NM_005228	c.869C>T	p.T290I			3e-05	0.114806	1	1
EGFR	7	55221830	G	A	Missense	NM_005228	c.874G>A	p.V292M			9e-06	0.19338	1	0
EGFR	7	55223532	T	A	Missense	NM_005228	c.899T>A	p.V300E			0	0.450963	0	1
EGFR	7	55223604	G	T	Missense	NM_005228	c.971G>T	p.R324L			0	0.200341	0	0
EGFR	7	55227903	G	C	Missense	NM_005228	c.1370G>C	p.S457T			0	0.123763	0	1
EGFR	7	55232998	C	T	Missense	NM_005228	c.1748C>T	p.A583V			0	0.0193371	0	1
EGFR	7	55240707	G	A	Missense	NM_005228	c.1951G>A	p.V651M			0	0.221226	0	0
EGFR	7	55240795	G	A	Missense	NM_005228	c.2039G>A	p.R680Q			0.0001	0.0990445	1	0
EGFR	7	55241653	C	A	Missense	NM_005228	c.2101C>A	p.Q701K			9e-06	0.19338	0	1
EGFR	7	55241659	C	T	Missense	NM_005228	c.2107C>T	p.L703F			9e-06	0.0402222	1	0
EGFR	7	55241690	A	C	Missense	NM_005228	c.2138A>C	p.K713T			4.5e-05	0.0399082	1	0
EGFR	7	55241711	C	T	Missense	NM_005228	c.2159C>T	p.S720F			0	0.123763	1	0
EGFR	7	55242419	T	G	Missense	NM_005228	c.2189T>G	p.L730R			9e-05	0.174135	1	0
EGFR	7	55242454	G	A	Missense	NM_005228	c.2224G>A	p.V742I			3.2e-05	0.0981059	0	1
EGFR	7	55249007	G	A	Missense	NM_005228	c.2305G>A	p.V769M			6.5e-05	0.073967	0	1
EGFR	7	55249028	C	T	Missense	NM_005228	c.2326C>T	p.R776C			0	0.339575	2	0
EGFR	7	55249075	G	T	Missense	NM_005228	c.2373G>T	p.Q791H			9e-06	0.297805	1	0
EGFR	7	55249166	G	A	Missense	NM_005228	c.2464G>A	p.A822T			9e-06	0.430077	1	1
EGFR	7	55259448	C	T	Missense	NM_005228	c.2506C>T	p.R836C			6.5e-05	0.24801	0	1
EGFR	7	55259460	G	A	Missense	NM_005228	c.2518G>A	p.A840T			5.4e-05	0.161101	0	3
EGFR	7	55259484	C	T	Missense	NM_005228	c.2542C>T	p.P848S			0	0.116801	0	1
EGFR	7	55259560	G	A	Missense	NM_005228	c.2618G>A	p.G873E			0	0.367422	1	0
EGFR	7	55266532	G	A	Missense	NM_005228	c.2824G>A	p.D942N			9e-06	0.0611073	1	2
EGFR	7	55266551	T	A	Missense	NM_005228	c.2843T>A	p.V948D			0	0.416154	0	1
EGFR	7	55268026	G	T	Missense	NM_005228	c.2866G>T	p.D956Y			0	0.207303	1	0
EGFR	7	55268032	C	T	Missense	NM_005228	c.2872C>T	p.R958C			0	0.444001	0	1
EGFR	7	55268044	C	T	Missense	NM_005228	c.2884C>T	p.R962C			0.00014	0.0692463	1	1
EGFR	7	55268998	G	A	Missense	NM_005228	c.3064G>A	p.G1022S			0	0.0193371	0	1
EGFR	7	55269019	A	G	Missense	NM_005228	c.3085A>G	p.T1029A			0	0.0123754	1	0
EGFR	7	55270246	C	A	Missense	NM_005228	c.3199C>A	p.Q1067K			9.1e-06	0.0889541	0	2
EGFR	7	55270261	G	A	Missense	NM_005228	c.3214G>A	p.D1072N			0	0.0402222	1	1
EHHADH	3	184910105	G	A	Missense	NM_001966	c.2081C>T	p.P694L			9e-05	0.222867	2	3
EHHADH	3	184910198	G	C	Missense	NM_001966	c.1988C>G	p.P663R			0	0.478809	0	1
EHHADH	3	184910209	G	T	Missense	NM_001966	c.1977C>A	p.H659Q			1.8e-05	0.293986	1	0
EHHADH	3	184910288	C	T	Missense	NM_001966	c.1898G>A	p.R633H			6.5e-05	0.073967	1	0
EHHADH	3	184910307	G	A	Missense	NM_001966	c.1879C>T	p.L627F			0.00039	0.237826	0	2
EHHADH	3	184910352	G	A	Missense	NM_001966	c.1834C>T	p.R612C			6.5e-05	0.192316	0	4
EHHADH	3	184910465	T	C	Missense	NM_001966	c.1721A>G	p.K574R			0	0.262997	0	1
EHHADH	3	184910477	C	T	Missense	NM_001966	c.1709G>A	p.R570Q			0.00011	0.224474	2	0
EHHADH	3	184910507	G	A	Missense	NM_001966	c.1679C>T	p.P560L			0	0.423116	0	1
EHHADH	3	184910574	C	T	Missense	NM_001966	c.1612G>A	p.G538S			9e-06	0.186418	1	0
EHHADH	3	184910744	C	T	Missense	NM_001966	c.1442G>A	p.G481E			6.3e-05	0.332408	0	1
EHHADH	3	184910775	C	G	Missense	NM_001966	c.1411G>C	p.V471L			2.7e-05	0.357922	1	0
EHHADH	3	184910807	A	G	Missense	NM_001966	c.1379T>C	p.M460T			9.9e-05	0.18325	0	1
EHHADH	3	184910874	G	A	Missense	NM_001966	c.1312C>T	p.H438Y			9e-06	0.207303	0	1
EHHADH	3	184910915	C	G	Missense	NM_001966	c.1271G>C	p.R424P			9e-06	0.179456	1	0
EHHADH	3	184910930	G	A	Missense	NM_001966	c.1256C>T	p.A419V			0	0.395269	1	0
EHHADH	3	184911050	A	G	Missense	NM_001966	c.1136T>C	p.I379T			0.00012	0.112832	1	0
EHHADH	3	184911179	G	A	Missense	NM_001966	c.1007C>T	p.A336V			0	0.186418	0	1
EHHADH	3	184911255	C	T	Missense	NM_001966	c.931G>A	p.G311S			6.4e-05	0.304133	1	1
EHHADH	3	184911255	C	A	Missense	NM_001966	c.931G>T	p.G311C			6e-05	0.300696	1	0
EHHADH	3	184922209	A	C	Missense	NM_001966	c.905T>G	p.V302G			1.9e-05	0.388118	1	0
EHHADH	3	184922288	T	C	Missense	NM_001966	c.826A>G	p.R276G			0	0.0889541	0	1
EHHADH	3	184922528	G	A	Missense	NM_001966	c.586C>T	p.R196C			8.2e-05	0.0803664	0	0
EHHADH	3	184947228	A	G	Missense	NM_001966	c.455T>C	p.I152T			0	0.36046	1	0
EHHADH	3	184953131	C	T	Missense	NM_001966	c.298G>A	p.G100R			0.00018	0.277408	1	0
EHHADH	3	184953164	G	C	Missense	NM_001966	c.265C>G	p.P89A			3e-05	0.191385	1	0
EHHADH	3	184966211	A	G	Missense	NM_001966	c.169T>C	p.F57L			2.7e-05	0.385769	1	1
EHHADH	3	184966234	A	T	Missense	NM_001966	c.146T>A	p.V49E			9e-06	0.36046	1	1
EML5	14	89082519	C	A	Missense	NM_183387	c.5864G>T	p.R1955L	rs750897466	1.07007e-05	1.8e-05	0.203484	2	0
EML5	14	89082537	C	T	Missense	NM_183387	c.5846G>A	p.R1949Q	rs369350892	1.7834e-05	1.8e-05	0.18956	1	2
EML5	14	89082552	T	C	Missense	NM_183387	c.5831A>G	p.H1944R			0	0.269958	1	1
EML5	14	89083170	T	A	Missense	NM_183387	c.5696A>T	p.D1899V	rs748396293	1.42622e-05	2.7e-05	0.086416	1	0
EML5	14	89085091	A	G	Missense	NM_183387	c.5441T>C	p.L1814P	rs763433355	4.28589e-06	0	0.221226	0	1
EML5	14	89087485	G	A	Missense	NM_183387	c.5174C>T	p.T1725I	rs373510031	2.81172e-05	6e-05	0.238041	3	0
EML5	14	89087552	C	G	Missense	NM_183387	c.5107G>C	p.G1703R			0	0.346537	1	0
EML5	14	89087582	A	C	Missense	NM_183387	c.5077T>G	p.C1693G			0	0.269958	1	0
EML5	14	89088959	A	C	Missense	NM_183387	c.5002T>G	p.C1668G			0	0.31869	1	0
EML5	14	89089010	G	A	Missense	NM_183387	c.4951C>T	p.R1651C	rs756203892	1.21605e-05	0	0.290843	2	1
EML5	14	89089015	C	T	Missense	NM_183387	c.4946G>A	p.R1649Q	rs1433220816	4.05656e-06	0	0.116801	1	0
EML5	14	89089016	G	A	Missense	NM_183387	c.4945C>T	p.R1649W	rs200761896	2.52012e-05	0	0.290843	0	1
EML5	14	89089051	C	T	Missense	NM_183387	c.4910G>A	p.G1637E	rs371875356	4.09625e-06	6.6e-05	0.171	0	1
EML5	14	89091316	C	A	Missense	NM_183387	c.4896G>T	p.R1632S			0	0.102878	0	1
EML5	14	89105192	G	A	Missense	NM_183387	c.4297C>T	p.H1433Y	rs760109371	3.10902e-05	0	0.109839	2	3
EML5	14	89109279	A	T	Missense	NM_183387	c.4195T>A	p.Y1399N			0	0.290843	1	0
EML5	14	89109335	C	T	Missense	NM_183387	c.4139G>A	p.R1380Q	rs370919746	1.31833e-05	2.8e-05	0.130837	1	0
EML5	14	89123778	G	A	Missense	NM_183387	c.3946C>T	p.R1316C			0	0.249073	0	1
EML5	14	89124560	T	G	Missense	NM_183387	c.3848A>C	p.E1283A	rs750770758	1.78303e-05	2.7e-05	0.0933777	1	2
EML5	14	89124597	C	T	Missense	NM_183387	c.3811G>A	p.E1271K			0	0.172495	0	1
EML5	14	89124636	C	T	Missense	NM_183387	c.3772G>A	p.G1258S	rs755046095	3.61722e-05	7.2e-05	0.154461	2	0
EML5	14	89131718	G	C	Missense	NM_183387	c.3240C>G	p.H1080Q			0	0.0750307	0	1
EML5	14	89148249	G	A	Missense	NM_183387	c.3109C>T	p.R1037W	rs1003072295	3.19285e-05	0	0.256035	1	0
EML5	14	89148281	T	G	Missense	NM_183387	c.3077A>C	p.D1026A			0	0.31869	1	0
EML5	14	89148360	C	T	Missense	NM_183387	c.2998G>A	p.E1000K	rs1448603101	8.44039e-06	0	0.116801	1	0
EML5	14	89151450	A	G	Missense	NM_183387	c.2891T>C	p.I964T	rs756176193	4.07256e-06	3.1e-05	0.200529	1	0
EML5	14	89151457	G	A	Missense	NM_183387	c.2884C>T	p.R962C	rs1461211967	1.10145e-05	0	0.269958	0	0
EML5	14	89153640	A	C	Missense	NM_183387	c.2774T>G	p.V925G			0	0.304767	1	0
EML5	14	89154694	C	A	Missense	NM_183387	c.2663G>T	p.C888F	rs1289254852	3.1841e-05	0	0.151609	0	1
EML5	14	89154757	A	G	Missense	NM_183387	c.2600T>C	p.M867T	rs753673517	2.00629e-05	4.5e-05	0.165219	1	0
EML5	14	89154814	C	T	Missense	NM_183387	c.2543G>A	p.G848E	rs759973428	8.05179e-06	3.3e-05	0.199903	0	1
EML5	14	89161765	T	G	Missense	NM_183387	c.2378A>C	p.D793A			0	0.290843	0	1
EML5	14	89168806	T	C	Missense	NM_183387	c.2222A>G	p.Y741C			0	0.130724	1	0
EML5	14	89171205	C	T	Missense	NM_183387	c.2050G>A	p.G684S	rs200608863	5.68939e-05	1.8e-05	0.217407	1	0
EML5	14	89172677	G	A	Missense	NM_183387	c.1751C>T	p.A584V			0	0.144648	0	1
EML5	14	89181432	A	G	Missense	NM_183387	c.1295T>C	p.V432A			0	0.0819924	0	1
EML5	14	89202789	T	C	Missense	NM_183387	c.968A>G	p.H323R			0	0.200341	1	0
EML5	14	89202879	C	T	Missense	NM_183387	c.878G>A	p.G293D			0	0.158571	1	0
EML5	14	89205232	C	T	Missense	NM_183387	c.838G>A	p.G280R			0	0.256035	0	1
EML5	14	89205264	A	C	Missense	NM_183387	c.806T>G	p.I269S			0	0.207303	0	1
EML5	14	89205291	C	T	Missense	NM_183387	c.779G>A	p.R260H	rs375366195	2.97155e-05	3.8e-05	0.0941818	1	0
EML5	14	89205292	G	A	Missense	NM_183387	c.778C>T	p.R260C	rs1459978812	3.18552e-05	0	0.19338	0	1
EML5	14	89205321	A	G	Missense	NM_183387	c.749T>C	p.F250S			0	0.23515	0	1
EML5	14	89212584	A	T	Missense	NM_183387	c.401T>A	p.V134D	rs1334282607	3.18471e-05	0	0.249073	0	1
EML5	14	89212626	C	G	Missense	NM_183387	c.359G>C	p.R120P			0	0.151609	1	0
EML5	14	89258715	C	G	Missense	NM_183387	c.133G>C	p.V45L			0	0.144648	0	0
ENO3	17	4855125	A	G	Missense	NM_001976	c.1A>G	p.M1V			0	0.31869	0	1
ENO3	17	4855188	G	A	Missense	NM_001976	c.64G>A	p.V22M			0.00012	0.14764	1	0
ENO3	17	4855201	C	A	Missense	NM_001976	c.77C>A	p.T26K			0.00027	0.104577	5	8
ENO3	17	4856099	G	T	Missense	NM_001976	c.95G>T	p.R32L			0	0.31869	0	1
ENO3	17	4856117	G	A	Missense	NM_001976	c.113G>A	p.G38E			0	0.325652	1	0
ENO3	17	4856170	C	T	Missense	NM_001976	c.166C>T	p.R56C			8.2e-05	0.101252	1	2
ENO3	17	4857022	A	T	Missense	NM_001976	c.326A>T	p.N109I			9e-06	0.249073	0	1
ENO3	17	4857048	G	T	Missense	NM_001976	c.352G>T	p.V118L			3e-05	0.191385	0	1
ENO3	17	4857058	C	T	Missense	NM_001976	c.362C>T	p.A121V			6.5e-05	0.220163	1	0
ENO3	17	4857078	G	T	Missense	NM_001976	c.382G>T	p.V128F			3.6e-05	0.132355	0	0
ENO3	17	4857079	T	A	Missense	NM_001976	c.383T>A	p.V128D			4.5e-05	0.269644	2	0
ENO3	17	4857108	G	C	Missense	NM_001976	c.412G>C	p.A138P			9e-06	0.339575	0	1
ENO3	17	4858379	G	A	Missense	NM_001976	c.454G>A	p.V152M			6.5e-05	0.227124	1	0
ENO3	17	4858392	G	A	Missense	NM_001976	c.467G>A	p.G156D			0.00036	0.360099	2	3
ENO3	17	4858394	T	G	Missense	NM_001976	c.469T>G	p.S157A			0	0.130724	1	0
ENO3	17	4858446	G	C	Missense	NM_001976	c.521G>C	p.G174A			1.8e-05	0.384488	1	0
ENO3	17	4858473	G	A	Missense	NM_001976	c.548G>A	p.R183H			6.5e-05	0.213201	1	0
ENO3	17	4858481	G	A	Missense	NM_001976	c.556G>A	p.A186T			5.4e-05	0.140216	2	0
ENO3	17	4858526	G	A	Missense	NM_001976	c.601G>A	p.G201R			9e-06	0.374384	0	1
ENO3	17	4858568	C	G	Missense	NM_001976	c.643C>G	p.P215A			0	0.242112	0	1
ENO3	17	4858746	G	T	Missense	NM_001976	c.712G>T	p.D238Y			0	0.165533	1	0
ENO3	17	4858759	T	C	Missense	NM_001976	c.725T>C	p.I242T			2.7e-05	0.337037	2	0
ENO3	17	4858761	G	A	Missense	NM_001976	c.727G>A	p.G243S			0	0.457924	0	1
ENO3	17	4859248	G	A	Missense	NM_001976	c.877G>A	p.E293K			0	0.471848	1	0
ENO3	17	4859321	G	A	Missense	NM_001976	c.950G>A	p.G317E			3e-05	0.337581	0	1
ENO3	17	4859894	G	C	Missense	NM_001976	c.1094G>C	p.W365S			0	0.36046	1	0
ENO3	17	4859900	T	A	Missense	NM_001976	c.1100T>A	p.V367E			0	0.36046	0	1
ENO3	17	4859921	G	A	Missense	NM_001976	c.1121G>A	p.G374E			0.0003	0.164334	1	0
ENO3	17	4860147	C	T	Missense	NM_001976	c.1198C>T	p.R400C			0.00052	0.0940146	1	0
ENO3	17	4860307	G	C	Missense	NM_001976	c.1270G>C	p.A424P			0	0.31869	1	0
EPCAM	2	47596645	A	G	Missense	NM_002354	c.1A>G	p.M1V			4.4e-05	0.271505	0	1
EPCAM	2	47596672	G	C	Missense	NM_002354	c.28G>C	p.G10R			1.2e-05	0.123763	1	0
EPCAM	2	47600605	G	A	Missense	NM_002354	c.80G>A	p.C27Y			3e-05	0.344542	1	0
EPCAM	2	47600967	A	G	Missense	NM_002354	c.205A>G	p.M69V			1.8e-05	0.307909	0	1
EPCAM	2	47601061	A	G	Missense	NM_002354	c.299A>G	p.D100G			9e-06	0.137686	0	1
EPCAM	2	47601069	G	A	Missense	NM_002354	c.307G>A	p.G103R			1.8e-05	0.502837	0	1
EPCAM	2	47601097	G	T	Missense	NM_002354	c.335G>T	p.G112V			0	0.102878	1	0
EPCAM	2	47601100	C	T	Missense	NM_002354	c.338C>T	p.T113I			3.2e-05	0.251263	2	0
EPCAM	2	47601109	G	A	Missense	NM_002354	c.347G>A	p.C116Y			9e-06	0.444001	0	0
EPCAM	2	47601166	G	T	Missense	NM_002354	c.404G>T	p.C135F			0	0.228188	0	1
EPCAM	2	47602374	T	A	Missense	NM_002354	c.427T>A	p.W143R			0	0.353499	0	0
EPCAM	2	47606141	A	C	Missense	NM_002354	c.605A>C	p.K202T			0	0.221226	1	0
EPCAM	2	47607083	C	T	Missense	NM_002354	c.833C>T	p.A278V			3e-05	0.12873	1	0
EPHA10	1	38185239	G	A	Missense	NM_001099439	c.2603C>T	p.P868L			0	0.262997	0	1
EPHA10	1	38185585	T	C	Missense	NM_001099439	c.2558A>G	p.Q853R			1.8e-05	0.18956	0	2
EPHA10	1	38185610	G	A	Missense	NM_001099439	c.2533C>T	p.R845W			6.5e-05	0.199278	0	1
EPHA10	1	38185636	A	G	Missense	NM_001099439	c.2507T>C	p.M836T			0.00012	0.154602	1	0
EPHA10	1	38185697	C	T	Missense	NM_001099439	c.2446G>A	p.E816K			9e-06	0.444001	1	0
EPHA10	1	38186150	G	A	Missense	NM_001099439	c.2285C>T	p.S762L			1.8e-05	0.14779	0	0
EPHA10	1	38186156	T	C	Missense	NM_001099439	c.2279A>G	p.Y760C			3.3e-05	0.255596	1	1
EPHA10	1	38186493	C	T	Missense	NM_001099439	c.2170G>A	p.E724K			2.7e-05	0.350961	0	3
EPHA10	1	38186498	A	G	Missense	NM_001099439	c.2165T>C	p.V722A			0	0.27692	0	1
EPHA10	1	38187398	C	T	Missense	NM_001099439	c.2080G>A	p.E694K			6.9e-05	0.09312	1	0
EPHA10	1	38187406	A	G	Missense	NM_001099439	c.2072T>C	p.F691S			6.9e-05	0.322856	1	0
EPHA10	1	38192853	C	G	Missense	NM_001099439	c.1693G>C	p.A565P			1.8e-05	0.0920967	1	0
EPHA10	1	38197117	A	C	Missense	NM_001099439	c.1629T>G	p.F543L			2.7e-05	0.0724926	0	1
EPHA10	1	38197154	G	T	Missense	NM_001099439	c.1592C>A	p.A531D			0	0.290843	1	0
EPHA10	1	38197157	C	T	Missense	NM_001099439	c.1589G>A	p.R530Q			6.5e-05	0.143584	1	0
EPHA10	1	38197184	G	A	Missense	NM_001099439	c.1562C>T	p.P521L			3.6e-05	0.31336	1	0
EPHA10	1	38200979	C	T	Missense	NM_001099439	c.1441G>A	p.G481R			0	0.137686	0	1
EPHA10	1	38219893	A	C	Missense	NM_001099439	c.1000T>G	p.C334G			0.00012	0.119793	1	2
EPHA10	1	38219925	G	A	Missense	NM_001099439	c.968C>T	p.A323V			0	0.0959158	0	1
EPHA10	1	38219974	G	A	Missense	NM_001099439	c.919C>T	p.R307W			0	0.0819924	1	0
EPHA10	1	38220007	G	A	Missense	NM_001099439	c.886C>T	p.R296W			0	0.130724	1	0
EPHA10	1	38227127	C	T	Missense	NM_001099439	c.800G>A	p.G267D			3.7e-05	0.325611	1	1
EPHA10	1	38227368	C	G	Missense	NM_001099439	c.559G>C	p.G187R			0	0.297805	0	2
EPHA10	1	38227461	C	T	Missense	NM_001099439	c.466G>A	p.A156T			0	0.0959158	0	1
EPN3	17	48613940	G	A	Missense	NM_017957	c.23G>A	p.R8H	rs747912399	1.76907e-05	5.8e-05	0.200948	2	1
EPN3	17	48613984	A	G	Missense	NM_017957	c.67A>G	p.K23E	rs756507809	7.95678e-06	3e-05	0.274925	1	2
EPN3	17	48613990	C	T	Missense	NM_017957	c.73C>T	p.R25C	rs753177479	3.53719e-05	0.00035	0.0758191	0	1
EPN3	17	48613991	G	A	Missense	NM_017957	c.74G>A	p.R25H	rs139367693	0.000254665	0.00053	0.0855163	8	6
EPN3	17	48614030	C	T	Missense	NM_017957	c.113C>T	p.S38L	rs1365357138	7.07204e-06	3e-05	0.177462	1	0
EPN3	17	48614036	T	C	Missense	NM_017957	c.119T>C	p.M40T	rs772455107	2.38622e-05	0.00012	0.168525	0	1
EPN3	17	48614047	G	A	Missense	NM_017957	c.130G>A	p.A44T	rs762267249	1.59089e-05	0.00012	0.14764	1	0
EPN3	17	48614104	C	T	Missense	NM_017957	c.187C>T	p.R63W	rs745948432	1.98851e-05	3.6e-05	0.257666	1	0
EPN3	17	48614131	C	T	Missense	NM_017957	c.214C>T	p.R72W	rs955884638	2.47523e-05	4.5e-05	0.206989	0	1
EPN3	17	48614153	C	T	Missense	NM_017957	c.236C>T	p.T79I	rs745860568	3.97747e-06	9e-06	0.256035	0	1
EPN3	17	48614204	G	A	Missense	NM_017957	c.287G>A	p.C96Y			0	0.304767	0	1
EPN3	17	48614227	C	A	Missense	NM_017957	c.310C>A	p.Q104K	rs1333291926	7.07139e-06	9e-06	0.200341	0	1
EPN3	17	48614263	G	A	Missense	NM_017957	c.346G>A	p.G116S	rs749208124	1.76805e-05	3.2e-05	0.251263	1	1
EPN3	17	48614287	C	T	Missense	NM_017957	c.370C>T	p.R124C	rs143715207	7.07449e-06	9e-06	0.339575	1	0
EPN3	17	48614344	G	A	Missense	NM_017957	c.427G>A	p.E143K	rs746194328	3.1979e-05	7.2e-05	0.203193	1	0
EPN3	17	48614348	G	A	Missense	NM_017957	c.431G>A	p.R144Q	rs780384032	3.2003e-05	0.00033	0.175295	1	0
EPN3	17	48614356	G	A	Missense	NM_017957	c.439G>A	p.A147T	rs762757943	2.00353e-05	3.6e-05	0.181087	0	1
EPN3	17	48614375	G	A	Missense	NM_017957	c.458G>A	p.R153H	rs530407767	4.64253e-05	8.2e-05	0.143022	2	1
EPN3	17	48618614	T	G	Missense	NM_017957	c.1274T>G	p.F425C	rs1480346256	3.19e-05	0	0.102878	1	0
EPN3	17	48618894	A	G	Missense	NM_017957	c.1424A>G	p.D475G			0	0.214265	1	0
EPN3	17	48619337	T	A	Missense	NM_017957	c.1718T>A	p.M573K			0	0.109839	1	0
EPS8L2	11	720065	C	G	Missense	NM_022772	c.169C>G	p.L57V			9.1e-06	0.0819924	1	0
EPS8L2	11	721575	A	C	Missense	NM_022772	c.779A>C	p.N260T			0	0.179456	0	1
EPS8L2	11	721602	T	C	Missense	NM_022772	c.806T>C	p.F269S			0	0.31869	0	1
EPS8L2	11	722456	T	C	Missense	NM_022772	c.1115T>C	p.L372P			9e-06	0.346537	1	0
EPS8L2	11	724776	T	C	Missense	NM_022772	c.1507T>C	p.F503L			0	0.151609	1	0
EPS8L2	11	724803	T	C	Missense	NM_022772	c.1534T>C	p.S512P			0	0.0889541	0	1
EPS8L2	11	725751	G	C	Missense	NM_022772	c.1584G>C	p.W528C			0.0021	0.243139	28	26
EPS8L2	11	726665	C	T	Missense	NM_022772	c.1981C>T	p.L661F			0	0.109839	0	1
ERCC2	19	45854939	A	G	Missense	NM_000400	c.2231T>C	p.L744P	rs201370106	2.00327e-05	9.8e-05	0.246567	1	0
ERCC2	19	45855486	A	G	Missense	NM_000400	c.2171T>C	p.M724T	rs763701580	6.3748e-05	9e-06	0.367422	4	0
ERCC2	19	45855493	G	A	Missense	NM_000400	c.2164C>T	p.R722W	rs121913026	3.18647e-05	3.2e-05	0.313919	4	1
ERCC2	19	45855507	G	C	Missense	NM_000400	c.2150C>G	p.A717G	rs144564120	0.000307827	0.0004	-0.0837469	7	5
ERCC2	19	45855520	C	G	Missense	NM_000400	c.2137G>C	p.G713R			0	0.214265	1	0
ERCC2	19	45855523	C	T	Missense	NM_000400	c.2134G>A	p.E712K	rs775212976	3.18613e-05	0	0.23515	0	1
ERCC2	19	45855526	C	T	Missense	NM_000400	c.2131G>A	p.D711N	rs763610846	3.9789e-06	9e-06	0.102878	1	0
ERCC2	19	45855541	G	A	Missense	NM_000400	c.2116C>T	p.L706F	rs755217625	3.97779e-06	5.8e-05	0.0756376	0	0
ERCC2	19	45855546	G	T	Missense	NM_000400	c.2111C>A	p.A704D			0	0.0819924	1	0
ERCC2	19	45855574	G	A	Missense	NM_000400	c.2083C>T	p.R695C	rs201392911	0.000145037	0.00033	0.0778317	2	0
ERCC2	19	45855593	G	T	Missense	NM_000400	c.2064C>A	p.D688E	rs1260724831	3.18735e-05	0	0.165533	0	1
ERCC2	19	45855601	G	A	Missense	NM_000400	c.2056C>T	p.R686C	rs144277365	5.9721e-05	0.00013	0.105197	0	1
ERCC2	19	45855775	A	G	Missense	NM_000400	c.2035T>C	p.F679L	rs1408935510	3.97795e-06	0	0.179456	0	1
ERCC2	19	45855787	C	G	Missense	NM_000400	c.2023G>C	p.G675R			0	0.444001	1	0
ERCC2	19	45855838	G	A	Missense	NM_000400	c.1972C>T	p.R658C	rs121913021	2.83034e-05	0.0002	0.312122	1	0
ERCC2	19	45855864	T	C	Missense	NM_000400	c.1946A>G	p.N649S			0	0.0889541	0	1
ERCC2	19	45855871	G	A	Missense	NM_000400	c.1939C>T	p.R647C	rs370377312	3.5408e-05	5.8e-05	0.333221	1	1
ERCC2	19	45856015	G	A	Missense	NM_000400	c.1891C>T	p.R631C	rs144511865	1.76967e-05	3.6e-05	0.334245	2	1
ERCC2	19	45856049	G	C	Missense	NM_000400	c.1857C>G	p.I619M			0	0.346537	1	0
ERCC2	19	45856059	C	G	Missense	NM_000400	c.1847G>C	p.R616P	rs376556895	0.000145363	0.00026	0.314379	7	7
ERCC2	19	45856060	G	A	Missense	NM_000400	c.1846C>T	p.R616W	rs121913024	5.67187e-05	9.7e-05	0.379498	1	0
ERCC2	19	45856370	C	T	Missense	NM_000400	c.1802G>A	p.R601Q	rs140522180	0.000180728	0.00038	0.120798	7	9
ERCC2	19	45856371	G	A	Missense	NM_000400	c.1801C>T	p.R601W	rs753641926	4.25131e-05	0.00023	0.143152	1	0
ERCC2	19	45856395	C	T	Missense	NM_000400	c.1777G>A	p.G593R	rs759307982	2.78698e-05	5.4e-05	0.383876	1	0
ERCC2	19	45856398	G	A	Missense	NM_000400	c.1774C>T	p.R592C	rs190678702	3.18456e-05	8.9e-05	0.28599	1	0
ERCC2	19	45856520	C	G	Missense	NM_000400	c.1738G>C	p.A580P	rs751318902	7.95912e-06	2.7e-05	0.420578	0	1
ERCC2	19	45856538	C	T	Missense	NM_000400	c.1720G>A	p.G574S			0	0.123763	0	1
ERCC2	19	45857997	C	G	Missense	NM_000400	c.1656G>C	p.W552C			0	0.513618	1	0
ERCC2	19	45858929	C	A	Missense	NM_000400	c.1537G>T	p.D513Y			0	0.450963	1	0
ERCC2	19	45858976	C	T	Missense	NM_000400	c.1490G>A	p.R497H	rs757432268	2.47511e-05	3.6e-05	0.201972	2	0
ERCC2	19	45858980	C	T	Missense	NM_000400	c.1486G>A	p.G496S	rs1437680307	6.3743e-05	0	0.165533	0	1
ERCC2	19	45860547	C	T	Missense	NM_000400	c.1460G>A	p.R487Q	rs150865508	4.60944e-05	0.00013	0.07735	0	1
ERCC2	19	45860584	G	C	Missense	NM_000400	c.1423C>G	p.P475A			0	0.144648	1	0
ERCC2	19	45860588	G	T	Missense	NM_000400	c.1419C>A	p.F473L	rs1359215642	1.06147e-05	1.8e-05	0.217407	0	0
ERCC2	19	45860607	T	C	Missense	NM_000400	c.1400A>G	p.Y467C			0	0.450963	1	0
ERCC2	19	45860623	A	C	Missense	NM_000400	c.1384T>G	p.S462A			0	0.130724	0	1
ERCC2	19	45860626	G	C	Missense	NM_000400	c.1381C>G	p.L461V	rs121913016	0.00110781	0.0071	0.0618973	7	6
ERCC2	19	45860748	A	G	Missense	NM_000400	c.1361T>C	p.V454A	rs780844758	3.97712e-06	0	0.346537	1	0
ERCC2	19	45864881	G	A	Missense	NM_000400	c.1138C>T	p.R380W	rs756071720	7.9576e-06	9e-06	0.179456	1	0
ERCC2	19	45864886	C	T	Missense	NM_000400	c.1133G>A	p.R378H	rs200043231	1.19389e-05	3e-05	0.323657	1	0
ERCC2	19	45864887	G	A	Missense	NM_000400	c.1132C>T	p.R378C	rs186220206	1.59203e-05	5.8e-05	0.145255	1	0
ERCC2	19	45867058	G	A	Missense	NM_000400	c.1061C>T	p.P354L			0	0.0959158	0	1
ERCC2	19	45867092	G	A	Missense	NM_000400	c.1027C>T	p.R343W			0	0.297805	0	1
ERCC2	19	45867116	G	A	Missense	NM_000400	c.1003C>T	p.R335W			0	0.36046	0	1
ERCC2	19	45867148	C	A	Missense	NM_000400	c.971G>T	p.R324L			0	0.423116	1	0
ERCC2	19	45867167	C	T	Missense	NM_000400	c.952G>A	p.A318T	rs749260944	2.06498e-05	0	0.151609	1	0
ERCC2	19	45867291	G	A	Missense	NM_000400	c.902C>T	p.T301M	rs199863965	6.39035e-06	0	0.290843	1	0
ERCC2	19	45867337	G	A	Missense	NM_000400	c.856C>T	p.R286W			0	0.283882	1	0
ERCC2	19	45867343	C	T	Missense	NM_000400	c.850G>A	p.E284K			0	0.381346	1	0
ERCC2	19	45867532	C	T	Missense	NM_000400	c.776G>A	p.C259Y	rs370454709	6.39214e-05	0.00011	0.280168	1	2
ERCC2	19	45867588	G	C	Missense	NM_000400	c.720C>G	p.D240E	rs1213865808	2.3982e-05	4.5e-05	0.151295	2	0
ERCC2	19	45867790	C	A	Missense	NM_000400	c.610G>T	p.V204L			0	0.144648	0	1
ERCC2	19	45868350	G	A	Missense	NM_000400	c.427C>T	p.R143W	rs765679315	3.98575e-06	3.3e-05	0.220788	0	1
ERCC2	19	45868404	G	A	Missense	NM_000400	c.373C>T	p.R125C	rs372425466	4.60448e-05	6.3e-05	0.227982	1	1
ERCC2	19	45871890	C	T	Missense	NM_000400	c.358G>A	p.E120K			0	0.27692	1	0
ERCC2	19	45871950	C	T	Missense	NM_000400	c.298G>A	p.E100K	rs964247601	1.19558e-05	3e-05	0.0869594	1	0
ERCC2	19	45871988	A	G	Missense	NM_000400	c.260T>C	p.L87P	rs779462120	1.78955e-05	2.7e-05	0.392731	2	1
ERCC2	19	45872237	T	A	Missense	NM_000400	c.197A>T	p.E66V	rs961564676	1.19298e-05	6.5e-05	0.101814	0	1
ERCC2	19	45872330	T	C	Missense	NM_000400	c.181A>G	p.R61G	rs1420151470	3.97624e-06	9e-06	0.151609	1	0
ERCC2	19	45873396	C	T	Missense	NM_000400	c.100G>A	p.A34T	rs768632615	1.20036e-05	2.7e-05	0.121224	1	0
ERCC2	19	45873404	G	A	Missense	NM_000400	c.92C>T	p.T31M	rs374798062	7.98735e-06	3.6e-05	0.320321	2	3
ERCC2	19	45873420	G	A	Missense	NM_000400	c.76C>T	p.R26W	rs933045867	3.19142e-05	0	0.0750307	1	0
ERCC2	19	45873798	T	C	Missense	NM_000400	c.1A>G	p.M1V	rs757252017	2.36985e-05	3.6e-05	0.31336	0	1
ERCC4	16	14014057	T	A	Missense	NM_005236	c.35T>A	p.M12K			0	0.423116	0	1
ERCC4	16	14014059	G	A	Missense	NM_005236	c.37G>A	p.A13T			7.3e-05	0.11225	2	2
ERCC4	16	14014060	C	T	Missense	NM_005236	c.38C>T	p.A13V			0	0.242112	0	1
ERCC4	16	14015928	A	G	Missense	NM_005236	c.248A>G	p.H83R			0	0.346537	0	1
ERCC4	16	14015982	A	G	Missense	NM_005236	c.302A>G	p.Y101C			0	0.430077	1	0
ERCC4	16	14016047	A	G	Missense	NM_005236	c.367A>G	p.I123V			1.8e-05	0.0712116	1	0
ERCC4	16	14020425	G	T	Missense	NM_005236	c.396G>T	p.L132F			9e-06	0.214265	1	0
ERCC4	16	14020465	G	A	Missense	NM_005236	c.436G>A	p.A146T			0	0.297805	0	1
ERCC4	16	14020570	G	A	Missense	NM_005236	c.541G>A	p.V181M			2.7e-05	0.260458	0	1
ERCC4	16	14022073	T	C	Missense	NM_005236	c.773T>C	p.I258T			0	0.144648	0	1
ERCC4	16	14024574	G	T	Missense	NM_005236	c.800G>T	p.R267L			6.5e-05	0.234086	1	0
ERCC4	16	14024574	G	A	Missense	NM_005236	c.800G>A	p.R267H			6.5e-05	0.171431	0	1
ERCC4	16	14024583	T	C	Missense	NM_005236	c.809T>C	p.L270P			1.8e-05	0.39145	0	1
ERCC4	16	14024613	A	T	Missense	NM_005236	c.839A>T	p.K280M			0	0.200341	0	1
ERCC4	16	14024616	C	G	Missense	NM_005236	c.842C>G	p.T281S			0	0.256035	1	0
ERCC4	16	14024674	G	T	Missense	NM_005236	c.900G>T	p.Q300H			9e-06	0.256035	0	1
ERCC4	16	14024712	T	C	Missense	NM_005236	c.938T>C	p.L313P			4.5e-05	0.255721	1	0
ERCC4	16	14026059	G	A	Missense	NM_005236	c.1019G>A	p.R340Q			9.7e-05	0.128877	1	0
ERCC4	16	14029093	T	G	Missense	NM_005236	c.1304T>G	p.L435R			6.6e-05	0.157077	1	0
ERCC4	16	14029408	C	T	Missense	NM_005236	c.1619C>T	p.S540L			6.5e-05	0.157507	3	3
ERCC4	16	14029465	G	A	Missense	NM_005236	c.1676G>A	p.G559D			9.9e-05	0.197173	0	1
ERCC4	16	14029495	T	C	Missense	NM_005236	c.1706T>C	p.V569A			1.8e-05	0.0990584	1	0
ERCC4	16	14029554	C	T	Missense	NM_005236	c.1765C>T	p.R589W			0.00015	0.175943	0	4
ERCC4	16	14029559	G	C	Missense	NM_005236	c.1770G>C	p.Q590H			0	0.304767	1	0
ERCC4	16	14029594	C	T	Missense	NM_005236	c.1805C>T	p.P602L			0	0.144648	0	1
ERCC4	16	14029600	G	C	Missense	NM_005236	c.1811G>C	p.R604T			0	0.304767	1	0
ERCC4	16	14041554	C	T	Missense	NM_005236	c.2101C>T	p.R701C			0	0.165533	0	1
ERCC4	16	14041590	G	T	Missense	NM_005236	c.2137G>T	p.V713F			0	0.27692	1	0
ERCC4	16	14041668	G	A	Missense	NM_005236	c.2215G>A	p.G739S			3e-05	0.073036	0	1
ERCC4	16	14041759	T	A	Missense	NM_005236	c.2306T>A	p.L769H			0	0.283882	0	1
ERCC4	16	14041801	A	G	Missense	NM_005236	c.2348A>G	p.D783G			1.8e-05	0.231331	1	0
ERCC4	16	14041849	G	A	Missense	NM_005236	c.2396G>A	p.R799Q			3.2e-05	0.181646	0	1
ERCC4	16	14041866	T	A	Missense	NM_005236	c.2413T>A	p.S805T			0	0.165533	0	1
ERCC6	10	50666937	A	G	Missense	NM_000124	c.4406T>C	p.L1469P			0	0.471848	1	0
ERCC6	10	50666951	A	C	Missense	NM_000124	c.4392T>G	p.C1464W			0	0.332614	0	1
ERCC6	10	50667051	A	C	Missense	NM_000124	c.4292T>G	p.M1431R			9e-06	0.130724	1	0
ERCC6	10	50667138	G	A	Missense	NM_000124	c.4205C>T	p.P1402L			0	0.214265	0	1
ERCC6	10	50669425	C	T	Missense	NM_000124	c.3956G>A	p.G1319E			0	0.179456	1	0
ERCC6	10	50669549	C	G	Missense	NM_000124	c.3832G>C	p.D1278H			0	0.450963	0	1
ERCC6	10	50679092	T	A	Missense	NM_000124	c.2999A>T	p.D1000V			9e-06	0.437039	0	1
ERCC6	10	50679111	G	A	Missense	NM_000124	c.2980C>T	p.R994W			3.6e-05	0.320321	0	1
ERCC6	10	50680476	A	C	Missense	NM_000124	c.2870T>G	p.V957G			0	0.430077	0	1
ERCC6	10	50680489	G	T	Missense	NM_000124	c.2857C>A	p.Q953K			0	0.457924	0	1
ERCC6	10	50680989	T	C	Missense	NM_000124	c.2795A>G	p.Y932C			0.00045	0.146068	1	2
ERCC6	10	50680996	C	A	Missense	NM_000124	c.2788G>T	p.V930F			0	0.179456	0	1
ERCC6	10	50681032	C	T	Missense	NM_000124	c.2752G>A	p.G918S			0	0.409192	1	0
ERCC6	10	50681053	G	C	Missense	NM_000124	c.2731C>G	p.L911V			2.7e-05	0.211727	1	0
ERCC6	10	50681593	T	C	Missense	NM_000124	c.2639A>G	p.Y880C			3.6e-05	0.285513	1	0
ERCC6	10	50682131	A	G	Missense	NM_000124	c.2540T>C	p.L847S			0	0.444001	1	0
[truncated: 3,745 more rows]
