# Supplementary material for: Uncovering the Contribution of Moderate-Penetrance Susceptibility Genes to Breast Cancer by Whole-Exome Sequencing and Targeted Enrichment Sequencing of Candidate Genes in Women of European Ancestry
Source: Cancers (Basel). 2022 Jul 11;14(14):3363. doi: 10.3390/cancers14143363 (PMC9317824; doi:10.3390/cancers14143363)
Supplement: Supplementary file 1 [file cancers-14-03363-s001.zip › Table S6-final_16052022.xlsx]

## Sheet: Table S6
Table S6: Associations, by study, of loss of function and rare missense variants in 32 genes included in breast cancer susceptibility gene panels with breast cancer risk.
Gene	GC-HBOC (3070 cases, 2735 controls)												SEARCH (1159 cases, 1318 controls)												DFBBCS (990 cases, 940 controls)												OFBCR (580 cases, 572 controls)												CARTAGENE (406 cases, 450 controls)
	Loss of function variants carriers		OR	95 %CI		p-value	Rare missense variants carriers		OR	95 %CI		p-value	Loss of function variants carriers		OR	95 %CI		p-value	Rare missense variants carriers		OR	95 %CI		p-value	Loss of function variants carriers		OR	95 %CI		p-value	Rare missense variants carriers		OR	95 %CI		p-value	Loss of function variants carriers		OR	95 %CI		p-value	Rare missense variants carriers		OR	95 %CI		p-value	Loss of function variants carriers
	Cases	Controls					Cases	Controls					Cases	Controls					Cases	Controls					Cases	Controls					Cases	Controls					Cases	Controls					Cases	Controls					Cases
AKT1	1	1	0.890862	0.0114	69.9182	1	2	2	0.890827	0.0645	12.2939	1	0	0	-	-	-	-	1	0	Inf	0.0292	Inf	0.467905	0	0	-	-	-	-	0	0	-	-	-	-	0	0	-	-	-	-	0	1	0	0	38.4626	0.496528	0
ATM	44	15	2.63615	1.4353	5.1116	0.000892465	100	48	1.88462	1.3173	2.7285	0.000308079	16	1	18.4256	2.8532	770.973	6.87129e-05	26	20	1.48907	0.7947	2.8299	0.232488	8	3	2.54314	0.6081	14.9293	0.226959	36	28	1.22898	0.7226	2.1095	0.447379	4	1	3.9609	0.3904	195.431	0.373973	29	12	2.45437	1.2	5.3377	0.0101793	2
BARD1	8	3	2.37885	0.5703	13.9367	0.234686	13	4	2.90275	0.8954	12.2404	0.0550283	1	0	Inf	0.0292	Inf	0.467905	5	5	1.13772	0.2611	4.9569	1	1	0	Inf	0.0243	Inf	1	3	9	0.314585	0.0546	1.2656	0.08421	1	1	0.986193	0.0125	77.502	1	3	3	0.986146	0.1315	7.3944	1	0
BRE/BABAM2	0	0	-	-	-	-	0	0	-	-	-	-	0	0	-	-	-	-	0	0	-	-	-	-	0	0	-	-	-	-	0	0	-	-	-	-	0	0	-	-	-	-	0	0	-	-	-	-	0
BRIP1	9	5	1.60523	0.4824	6.105	0.434311	12	3	3.57274	0.9628	19.7488	0.0393873	2	0	Inf	0.2136	Inf	0.218834	1	1	1.13725	0.0145	89.2826	1	1	1	0.949449	0.0121	74.5661	1	4	3	1.26692	0.2137	8.6698	1	1	2	0.492523	0.0083	9.4857	0.622081	2	2	0.98617	0.0713	13.6438	1	1
CDH1	1	0	Inf	0.0229	Inf	1	27	22	1.09413	0.5985	2.021	0.775886	1	0	Inf	0.0292	Inf	0.467905	8	11	0.825907	0.2873	2.2632	0.818637	2	0	Inf	0.1783	Inf	0.500077	8	4	1.90569	0.5085	8.6775	0.388144	0	0	-	-	-	-	2	5	0.392671	0.0372	2.4105	0.284417	0
CHEK2	31	10	2.7791	1.3248	6.3673	0.0041591	52	23	2.03134	1.2176	3.4875	0.00488707	26	8	3.75589	1.6432	9.6403	0.000736669	10	6	1.9026	0.6242	6.3904	0.22031	42	12	3.42452	1.7562	7.192	7.81666e-05	12	6	1.9094	0.66	6.227	0.238542	11	1	11.02	1.5926	474.942	0.0061121	12	4	2.99753	0.9015	12.8259	0.074901	1
EPCAM	1	1	0.890862	0.0114	69.9182	1	4	2	1.7826	0.2552	19.7131	0.690454	0	2	0	0	6.0546	0.501859	0	1	0	0	44.3203	1	0	0	-	-	-	-	3	1	2.85246	0.2286	149.876	0.625115	0	0	-	-	-	-	0	1		0	38.4626	0.496528	0
FAM175A/ABRAXAS1	0	0	-	-	-	-	0	0	-	-	-	-	0	0	-	-	-	-	0	0	-	-	-	-	0	0	-	-	-	-	0	0	-	-	-	-	0	0	-	-	-	-	0	0	-	-	-	-	0
FANCC	5	4	1.11374	0.2395	5.6197	1	9	6	1.33724	0.4245	4.5719	0.615859	3	4	0.852564	0.1246	5.051	1	1	1	1.13725	0.0145	89.2826	1	3	3	0.949347	0.1268	7.1064	1	0	0	-	-	-	-	1	2	0.492523	0.0083	9.4857	0.622081	1	2	0.492523	0.0083	9.4857	0.622081	1
FANCM	24	17	1.25969	0.6475	2.5039	0.531415	7	11	0.565994	0.1858	1.6014	0.247552	5	7	0.811532	0.2025	2.9795	0.779421	4	11	0.411644	0.0953	1.3939	0.128685	8	8	0.949089	0.3091	2.9141	1	3	2	1.42527	0.1629	17.093	1	2	5	0.392671	0.0372	2.4105	0.284417	1	1	0.986193	0.0125	77.502	1	3
GEN1	1	1	0.890862	0.0114	69.9182	1	5	5	0.89072	0.2048	3.875	1	2	0	Inf	0.2136	Inf	0.218834	0	0	0	0	Inf	1	0	0	-	-	-	-	1	1	0.949449	0.0121	74.5661	1	0	0	-	-	-	-	0	0	-	-	-	-	0
MEN1	0	0	-	-	-	-	5	0	Inf	0.8169	Inf	0.0644765	0	0	-	-	-	-	4	0	Inf	0.7515	Inf	0.0478004	0	0	-	-	-	-	2	1	1.90019	0.0988	112.189	1	0	0	-	-	-	-	1	1	0.986193	0.0125	77.502	1	0
MLH1	1	1	0.890862	0.0114	69.9182	1	12	12	0.89047	0.3652	2.1709	0.839221	0	0	-	-	-	-	2	7	0.323891	0.0328	1.7055	0.187	0	0	-	-	-	-	7	8	0.829685	0.255	2.6297	0.798714	0	0	-	-	-	-	3	2	1.4813	0.169	17.7904	1	0
MRE11A/MRE11	0	0	-	-	-	-	0	0	-	-	-	-	0	0	-	-	-	-	0	0	-	-	-	-	0	0	-	-	-	-	0	0	-	-	-	-	0	0	-	-	-	-	0	0	-	-	-	-	0
MSH2	1	0	Inf	0.0229	Inf	1	11	8	1.22572	0.4483	3.5157	0.81885	0	0	-	-	-	-	4	5	0.909497	0.18	4.2364	1	0	0	-	-	-	-	5	6	0.790285	0.1901	3.1195	0.768719	1	0	Inf	0.0253	Inf	1	0	2	0	0	5.2496	0.246323	0
MSH6	15	44	0.300348	0.1549	0.5517	1.95179e-05	27	27	0.88993	0.501	1.5808	0.683489	1	1	1.13725	0.0145	89.2826	1	13	21	0.700716	0.3208	1.4741	0.387603	1	0	Inf	0.0243	Inf	1	11	8	1.3088	0.4771	3.7656	0.648102	1	1	0.986193	0.0125	77.502	1	2	9	0.216714	0.0227	1.0535	0.0365099	1
MUTYH	1	2	0.445317	0.0076	8.559	0.604605	55	67	0.726463	0.4971	1.0578	0.0823795	1	0	Inf	0.0292	Inf	0.467905	38	38	1.14177	0.7034	1.8535	0.64078	2	1	1.90019	0.0988	112.189	1	25	14	1.71307	0.8508	3.5883	0.144359	0	0	-	-	-	-	15	18	0.817254	0.3793	1.7365	0.600141	0
NBN	12	23	0.462764	0.2094	0.9712	0.0400068	13	12	0.964965	0.4052	2.3181	1	4	1	4.55804	0.4503	224.539	0.192204	5	5	1.13772	0.2611	4.9569	1	2	1	1.90019	0.0988	112.189	1	5	2	2.37956	0.3884	25.0474	0.453378	1	2	0.492523	0.0083	9.4857	0.622081	0	0	-	-	-	-	0
NF1	19	17	0.995663	0.4889	2.0437	1	22	16	1.22654	0.6139	2.5039	0.625649	0	1	0	0	44.3203	1	8	4	2.2825	0.6096	10.3863	0.245948	0	0	-	-	-	-	2	7	0.269945	0.0273	1.4227	0.100482	0	0	-	-	-	-	1	5	0.196094	0.0041	1.7601	0.121627	0
PALB2	31	3	9.28532	2.892	47.4665	2.34143e-06	31	25	1.10572	0.6301	1.9586	0.78836	4	1	4.55804	0.4503	224.539	0.192204	4	13	0.347804	0.0823	1.1299	0.08487	4	5	0.758732	0.1501	3.5368	0.74766	10	9	1.05554	0.3835	2.9503	1	2	0	Inf	0.1853	Inf	0.49959	3	9	0.325524	0.0564	1.3131	0.0885954	1
PIK3CA	0	0	-	-	-	-	4	3	1.18805	0.2008	8.1194	1	0	0	-	-	-	-	3	5	0.681593	0.1056	3.512	0.730617	0	0	-	-	-	-	3	4	0.711375	0.104	4.217	0.719586	0	0	-	-	-	-	1	2	0.492523	0.0083	9.4857	0.622081	0
PMS2	15	26	0.511646	0.2514	1.0051	0.04104	21	18	1.03963	0.5262	2.0748	1	0	0	-	-	-	-	8	6	1.51957	0.4608	5.33	0.592932	0	1	0	0	37.0308	0.487047	5	4	1.18771	0.2548	6.0041	1	0	0	-	-	-	-	4	0	Inf	0.6524	Inf	0.124385	1
PTEN	2	1	1.78209	0.0927	105.125	1	3	1	2.67373	0.2146	140.344	0.627366	0	0	-	-	-	-	1	0	Inf	0.0292	Inf	0.467905	0	0	-	-	-	-	0	1	0	0	37.0308	0.487047	0	0	-	-	-	-	0	0	-	-	-	-	0
RAD50	5	2	2.22883	0.3646	23.4242	0.458294	1	8	0.111104	0.0025	0.8296	0.0158639	2	1	2.27585	0.1183	134.307	0.602393	3	4	0.852564	0.1246	5.051	1	1	4	0.236778	0.0048	2.3981	0.206743	3	0	Inf	0.3926	Inf	0.250115	1	1	0.986193	0.0125	77.502	1	1	1	0.986193	0.0125	77.502	1	0
RAD51C	5	2	2.22883	0.3646	23.4242	0.458294	5	5	0.89072	0.2048	3.875	1	1	1	1.13725	0.0145	89.2826	1	0	4	0	0	1.7213	0.12779	0	0	-	-	-	-	5	2	2.37956	0.3884	25.0474	0.453378	0	0	-	-	-	-	0	1	0	0	38.4626	0.496528	0
RAD51D	5	1	4.45898	0.4985	210.821	0.223188	7	5	1.24775	0.3404	4.9917	0.778663	1	0	Inf	0.0292	Inf	0.467905	2	6	0.378141	0.0372	2.1199	0.29637	1	1	0.949449	0.0121	74.5661	1	5	2	2.37956	0.3884	25.0474	0.453378	0	1	0	0	38.4626	0.496528	1	1	0.986193	0.0125	77.502	1	0
RECQL	9	4	2.00715	0.5594	8.9301	0.276734	13	8	1.44949	0.5559	4.0408	0.512944	2	1	2.27585	0.1183	134.307	0.602393	5	3	1.89869	0.3685	12.2537	0.485656	0	1		0	37.0308	0.487047	7	3	2.22315	0.5057	13.3632	0.34413	0	1	0	0	38.4626	0.496528	2	1	1.97465	0.1025	116.689	1	1
RINT1	3	6	0.444955	0.0719	2.0858	0.321763	3	1	2.67373	0.2146	140.344	0.627366	1	0	Inf	0.0292	Inf	0.467905	2	0	Inf	0.2136	Inf	0.218834	1	0	Inf	0.0243	Inf	1	2	1	1.90019	0.0988	112.189	1	0	0	-	-	-	-	3	3	0.986146	0.1315	7.3944	1	0
STK11	0	0	-	-	-	-	4	1	3.56604	0.3526	175.577	0.378943	0	0	-	-	-	-	1	2	0.568347	0.0096	10.9311	1	0	0	-	-	-	-	2	0	Inf	0.1783	Inf	0.500077	0	0	-	-	-	-	1	5	0.196094	0.0041	1.7601	0.121627	0
TP53	8	1	7.14122	0.9564	316.627	0.0417352	26	11	2.11483	1.0075	4.7522	0.0459958	0	0	-	-	-	-	5	2	2.84981	0.4655	29.9829	0.263106	1	0	Inf	0.0243	Inf	1	5	3	1.58507	0.3074	10.2379	0.726731	1	0	Inf	0.0253	Inf	1	2	0	Inf	0.1853	Inf	0.49959	1
XRCC2	0	0	-	-	-	-	0	2	0	0	4.7432	0.221935	0	0	-	-	-	-	2	4	0.567974	0.0513	3.9715	0.690979	0	0	-	-	-	-	2	2	0.949398	0.0687	13.1187	1	0	0	-	-	-	-	0	0	-	-	-	-	0
[truncated: 11 more columns]
