# Supplementary material for: Uncovering the Contribution of Moderate-Penetrance Susceptibility Genes to Breast Cancer by Whole-Exome Sequencing and Targeted Enrichment Sequencing of Candidate Genes in Women of European Ancestry
Source: Cancers (Basel). 2022 Jul 11;14(14):3363. doi: 10.3390/cancers14143363 (PMC9317824; doi:10.3390/cancers14143363)
Supplement: Supplementary file 1 [file cancers-14-03363-s001.zip › Table S7-final_16052022.xlsx]

## Sheet: Table S7
Associations of rare missense variants in 32 genes included in breast cancer gene panels with breast cancer risk overall , ER-negative and ER-positive breast cancer risk
		Overall					ER-negative					ER-positive
Gene	Number of carriers	Number of carriers	OR	95 %CI		p-value	Number of carriers	OR	95 %CI		p-value	Number of carriers	OR	95 %CI		p-value
	Conrols (n=6019)	Cases (n=6211)					Cases (n=808)					Cases (n=2764)
Rare missense variants
AKT1	3	3	0.943613	0.19	4.685	0.94341	0	0	0	Inf	0.994448	2	1.20647	0.201	7.229	0.837206
ATM	116	199	1.66786	1.322	2.104	1.56248e-05	25	1.64974	1.054	2.581	0.0284219	96	1.94115	1.462	2.578	4.62479e-06
BARD1	21	28	1.30948	0.742	2.31	0.351866	2	0.832961	0.192	3.609	0.806988	19	2.13537	1.129	4.038	0.0195902
BRE/BABAM2	0	0	-	-	-	-	0	-	-	-	-	0	-	-	-	-
BRIP1	11	20	1.73177	0.829	3.619	0.14422	5	3.77607	1.234	11.551	0.019856	7	1.77475	0.647	4.868	0.265161
CDH1	49	49	0.971479	0.652	1.447	0.886736	8	1.26303	0.587	2.72	0.550727	20	0.924501	0.54	1.583	0.774906
CHEK2	43	88	1.95453	1.354	2.821	0.000342839	13	2.26288	1.192	4.297	0.0125697	49	2.5135	1.638	3.856	2.43513e-05
EPCAM	5	7	1.31217	0.416	4.14	0.643053	0	0	0	Inf	0.992867	2	0.805549	0.154	4.214	0.797849
FAM175A/ABRAXAS1	0	0	-	-	-	-	0	-	-	-	-	0	-	-	-	-
FANCC	9	12	1.24765	0.525	2.966	0.616537	2	1.27964	0.274	5.971	0.753705	9	1.78305	0.707	4.499	0.220714
FANCM	27	15	0.550236	0.292	1.036	0.0643546	4	1.17281	0.402	3.418	0.770201	5	0.385053	0.147	1.011	0.0525326
GEN1	7	8	1.07303	0.388	2.965	0.891874	1	0.927719	0.11	7.798	0.944931	3	0.956418	0.236	3.872	0.950195
MEN1	2	12	5.92753	1.326	26.504	0.019863	0	0	0	Inf	0.99558	8	9.42983	1.952	45.554	0.0052337
MLH1	32	29	0.881347	0.532	1.46	0.623643	4	1.03561	0.359	2.989	0.948416	10	0.731844	0.353	1.516	0.400664
MRE11A/MRE11	0	0	-	-	-	-	0	-	-	-	-	0	-	-	-	-
MSH2	21	21	0.96395	0.525	1.768	0.905586	1	0.377247	0.05	2.836	0.343525	8	0.833231	0.365	1.905	0.66535
MSH6	68	53	0.759498	0.529	1.09	0.135783	6	0.664372	0.285	1.547	0.342955	30	0.905344	0.584	1.403	0.656449
MUTYH	143	144	0.989119	0.782	1.251	0.927161	15	0.736671	0.428	1.266	0.268972	67	0.957137	0.711	1.289	0.773203
NBN	19	24	1.21117	0.662	2.215	0.534042	1	0.333806	0.044	2.514	0.286839	13	1.31888	0.647	2.69	0.446661
NF1	33	33	0.950952	0.586	1.544	0.838768	8	1.65359	0.752	3.635	0.210822	14	0.888553	0.47	1.678	0.715681
PALB2	65	51	0.754165	0.522	1.091	0.133787	9	1.08238	0.53	2.211	0.828004	21	0.77198	0.464	1.284	0.318482
PIK3CA	15	12	0.799693	0.374	1.712	0.56482	4	2.52386	0.811	7.853	0.109906	3	0.493519	0.14	1.741	0.272314
PMS2	30	44	1.42427	0.894	2.27	0.136948	7	1.61969	0.698	3.757	0.261266	14	0.979872	0.512	1.875	0.951019
PTEN	2	4	1.87862	0.344	10.27	0.466901	0	0	0	Inf	0.995472	3	3.23623	0.52	20.136	0.207985
RAD50	13	8	0.60455	0.25	1.461	0.263724	1	0.472979	0.061	3.647	0.47249	3	0.454566	0.129	1.607	0.220958
RAD51C	12	10	0.794907	0.343	1.843	0.592681	2	1.1808	0.26	5.372	0.829763	3	0.554171	0.154	1.993	0.36603
RAD51D	17	16	0.931235	0.47	1.847	0.838382	3	1.5716	0.443	5.575	0.484041	3	0.444238	0.127	1.56	0.205479
RECQL	16	28	1.68686	0.911	3.123	0.0960798	4	1.81419	0.591	5.567	0.297789	10	1.37472	0.61	3.096	0.442355
RINT1	5	10	1.94678	0.664	5.704	0.22453	1	1.34081	0.154	11.682	0.790607	6	2.70236	0.807	9.048	0.10687
STK11	8	8	0.976494	0.366	2.607	0.96214	2	1.69016	0.354	8.074	0.510699	3	0.710306	0.188	2.685	0.614113
TP53	17	40	2.22461	1.26	3.929	0.0058638	6	2.44629	0.939	6.373	0.0670885	20	2.49277	1.279	4.857	0.0072828
XRCC2	9	4	0.45807	0.141	1.49	0.194424	0		0	Inf	0.990475	2	0.530833	0.111	2.535	0.427205
