# Supplementary material for: Uncovering the Contribution of Moderate-Penetrance Susceptibility Genes to Breast Cancer by Whole-Exome Sequencing and Targeted Enrichment Sequencing of Candidate Genes in Women of European Ancestry
Source: Cancers (Basel). 2022 Jul 11;14(14):3363. doi: 10.3390/cancers14143363 (PMC9317824; doi:10.3390/cancers14143363)
Supplement: Supplementary file 1 [file cancers-14-03363-s001.zip › Table S8-final_16052022.xlsx]

## Sheet: Table 8A
Associations of loss of function variants in 178 genes idendified at the discovery stage and overall breast cancer risk and ER-negative and ER-positive breast cancer risk
		Overall					ER-negative					ER-positive
Gene	Number of carriers	Number of carriers	OR	95 %CI		p-value	Number of carriers	OR	95 %CI		p-value	Number of carriers	OR	95 %CI		p-value
	Controls (n=6019)	Cases (n=6211)					Cases (n=808)					Cases (n=2764)
ABCG2	9	18	1.95114	0.88	4.35	0.102144	3	2.92203	0.755	11.314	0.120562	5	1.3	0.419	4.031	0.649528
ADAM29	0	0	-	-	-	-	0	-	-	-	-	0	-	-	-	-
ADAMTS12	9	8	0.890381	0.34	2.31	0.811624	1	0.924431	0.112	7.646	0.94189	5	1.27	0.403	4.015	0.680911
ADRA1A	11	8	0.683704	0.27	1.7	0.414172	2	1.0282	0.226	4.678	0.971301	2	0.32	0.072	1.463	0.142901
ADSSL1/ADSS1	6	5	0.841417	0.26	2.76	0.776003	0	0	0	Inf	0.992177	2	0.61	0.123	3.02	0.543529
AMFR	1	2	1.97822	0.18	21.87	0.577872	0	0	0	Inf	0.996999	2	5.17	0.44	60.78	0.191418
ANKK1	11	15	1.37346	0.63	3	0.425379	3	1.96856	0.539	7.192	0.305575	8	1.38	0.554	3.462	0.48649
ANKRD53	1	3	2.67427	0.28	25.67	0.393961	0	0	0	Inf	0.996781	3	5.24	0.544	50.394	0.151723
ARHGEF10L	3	3	0.962172	0.19	4.78	0.962401	0	0	0	Inf	0.994438	1	0.59	0.061	5.678	0.648001
ARL14EP	0	0	-	-	-	-	0	-	-	-	-	0	-	-	-	-
ASIP	0	0	-	-	-	-	0	-	-	-	-	0	-	-	-	-
ATP2A1	13	16	1.15181	0.55	2.4	0.705654	1	0.552529	0.071	4.289	0.570472	12	1.9	0.854	4.219	0.115502
ATP2C1	1	1	0.890844	0.06	14.25	0.934871	0	0	0	Inf	0.996781	0	0	0	Inf	0.994676
ATR	16	21	1.20729	0.63	2.32	0.571358	4	1.56432	0.513	4.774	0.431866	10	1.25	0.559	2.812	0.582443
ATRIP	5	10	1.90118	0.65	5.57	0.241436	1	0.998172	0.116	8.561	0.998668	5	1.78	0.514	6.152	0.36294
AUNIP	11	10	0.856185	0.36	2.02	0.722862	0	0	0	Inf	0.989204	4	0.79	0.246	2.56	0.699412
BAZ1B	1	0	0	0	inf	0.929173	0	0	0	Inf	0.996999	0	0	0	Inf	0.995014
BLM	14	21	1.40201	0.71	2.76	0.328635	2	0.981515	0.22	4.382	0.980499	10	1.38	0.606	3.118	0.445892
BLOC1S2	5	2	0.394102	0.08	2.04	0.266228	0	0	0	Inf	0.992804	0	0	0	Inf	0.988103
BPTF	5	5	1.0189	0.29	3.53	0.97643	1	2.08086	0.228	18.952	0.515611	2	1.27	0.226	7.181	0.784668
C2CD4A	0	0	-	-	-	-	0	-	-	-	-	0	-	-	-	-
C4orf48	1	1	0.890844	0.06	14.25	0.934871	0	0	0	Inf	0.996781	1	1.74	0.109	27.896	0.694299
C6orf211/ARMT1	6	4	0.63315	0.18	2.25	0.479536	1	1.21191	0.143	10.306	0.860305	2	0.66	0.132	3.32	0.616616
C6orf57/SDHAF4	2	0	0	0	inf	0.933616	0	0	0	Inf	0.995484	0	0	0	Inf	0.992485
CCDC11/CFAP53	2	2	0.967633	0.14	6.88	0.973772	0	0	0	Inf	0.995536	0	0	0	Inf	0.992528
CCDC66	127	108	0.826052	0.64	1.07	0.14874	16	0.947551	0.557	1.613	0.842689	48	0.84	0.595	1.178	0.306556
CCDC7	4	3	0.67399	0.15	3.01	0.605638	0	0	0	Inf	0.993552	3	1.49	0.327	6.793	0.606626
CDK11A	22	22	0.976132	0.54	1.77	0.936353	7	2.04534	0.863	4.85	0.104309	5	0.42	0.159	1.114	0.0812578
CDS1	3	1	0.296732	0.03	2.85	0.292405	0	0	0	Inf	0.994425	0	0	0	Inf	0.990779
CEACAM1	1	3	2.84998	0.3	27.42	0.364587	0	0	0	Inf	0.996781	3	5.32	0.553	51.193	0.147835
CEP104	7	16	2.2198	0.91	5.4	0.0788942	1	0.865799	0.104	7.213	0.894017	8	2.41	0.837	6.968	0.103125
CEP55	10	8	0.783861	0.31	1.99	0.608437	1	0.725788	0.091	5.766	0.761823	4	0.85	0.262	2.753	0.786305
CIDEB	16	14	0.821496	0.4	1.69	0.591846	2	0.739839	0.169	3.245	0.689547	4	0.47	0.155	1.398	0.173026
CLCN2	10	5	0.488877	0.17	1.43	0.191897	2	1.61813	0.346	7.571	0.540988	0	0	0	Inf	0.983116
CLEC10A	11	7	0.581515	0.23	1.5	0.262804	0	0	0	Inf	0.989322	4	0.67	0.213	2.125	0.499442
CLINT1	1	0	0	0	inf	0.930195	0	1	0	Inf	1	0	1	0	Inf	1
CLUH	3	1	0.317837	0.03	3.06	0.320882	0	0	0	Inf	0.994281	1	1.17	0.101	13.646	0.898731
COL5A2	0	2	0	0	inf	0.934473	0	-	-	-	-	1	0	0	Inf	0.994307
CTBP1	1	4	3.56686	0.4	31.9	0.255254	0	0	0	Inf	0.996781	3	5.24	0.544	50.394	0.151723
DARS2	5	8	1.46611	0.48	4.49	0.502454	1	1.55655	0.174	13.901	0.692042	5	2.38	0.667	8.509	0.181397
DGAT2	14	7	0.494368	0.2	1.23	0.128705	0	0	0	Inf	0.987998	5	1.01	0.348	2.931	0.985659
DHFRL1/DHFR2	0	0	-	-	-	-	0	-	-	-	-	0	-	-	-	-
DKKL1	1	0	0	0	inf	0.930375	0	0	0	Inf	0.996954	0	0	0	Inf	0.994697
DLX6	0	0	-	-	-	-	0	-	-	-	-	0	-	-	-	-
DNAH8	45	34	0.723646	0.46	1.13	0.15657	2	0.299583	0.072	1.245	0.0973139	12	0.56	0.293	1.071	0.0795142
DNAJC11	0	0	-	-	-	-	0	-	-	-	-	0	-	-	-	-
DUOX2	97	59	0.578576	0.42	0.8	0.00100158	2	0.150944	0.037	0.616	0.00839534	26	0.59	0.377	0.915	0.0185875
DYNC2H1	16	25	1.46345	0.78	2.75	0.235688	2	0.722403	0.165	3.166	0.666245	14	1.6	0.778	3.292	0.20178
E4F1	2	1	0.481983	0.04	5.33	0.551688	0	0	0	Inf	0.995484	1	0.89	0.081	9.826	0.924423
EAF2	3	1	0.296732	0.03	2.85	0.292405	0	0	0	Inf	0.994425	0	0	0	Inf	0.990779
EEFSEC	4	4	1.01267	0.25	4.06	0.985816	0	0	0	Inf	0.993717	2	1.06	0.191	5.913	0.94508
EFCAB5	31	27	0.847744	0.51	1.42	0.531896	1	0.289406	0.039	2.141	0.224653	15	1.07	0.567	2.001	0.84355
EGFR	0	1	0	0	inf	0.928664	0	-	-	-	-	0	-	-	-	-
EHHADH	3	1	0.350802	0.04	3.38	0.36455	0	0	0	Inf	0.994027	1	1.8	0.113	28.812	0.67763
ENO3	8	12	1.52848	0.62	3.75	0.353798	1	1.01013	0.124	8.259	0.9925	5	1.29	0.417	4.012	0.655466
EPHA10	10	10	0.952579	0.4	2.29	0.91366	1	0.55659	0.071	4.371	0.577385	5	0.91	0.311	2.672	0.865678
EPS8L2	3	7	2.26671	0.59	8.78	0.236164	1	2.16178	0.22	21.283	0.508807	5	3	0.717	12.58	0.132462
ERCC4	4	4	0.946781	0.24	3.8	0.938469	0	0	0	Inf	0.993613	2	0.89	0.163	4.865	0.893253
ERCC6	11	11	0.970525	0.42	2.24	0.944196	2	1.39785	0.297	6.575	0.671578	5	0.99	0.331	2.959	0.986115
FAM83B	1	0	2.29558e-05	0	inf	0.928754	0	0	0	Inf	0.996781	0	0	0	Inf	0.994676
FANCA	12	7	0.564466	0.22	1.44	0.229998	2	1.13112	0.249	5.13	0.873102	2	0.33	0.074	1.507	0.153943
FANCD2OS	2	2	1.02588	0.14	7.3	0.979649	0	0	0	Inf	0.99548	1	0.93	0.084	10.243	0.951007
FARP2	13	20	1.49058	0.74	3	0.263978	4	1.81982	0.582	5.694	0.303597	7	1.04	0.408	2.639	0.93863
FBXO11	1	0	2.29558e-05	0	inf	0.928754	0	0	0	Inf	0.996781	0	0	0	Inf	0.994676
FGFR3	1	0	2.29558e-05	0	inf	0.928754	0	0	0	Inf	0.996781	0	0	0	Inf	0.994676
FHL3	1	2	2.08392	0.19	23.04	0.549281	1	7.67912	0.45	131.186	0.159201	0	0	0	Inf	0.994676
FIGNL1	1	0	2.29558e-05	0	inf	0.928754	0	0	0	Inf	0.996781	0	0	0	Inf	0.994676
FOXM1	0	1	0	0	inf	0.930292	1	0	0	Inf	0.996133	0	-	-	-	-
FRMPD1	3	3	0.978665	0.2	4.86	0.978963	0	0	0	Inf	0.99449	2	1.21	0.201	7.229	0.837206
GINS4	1	1	0.919694	0.06	14.72	0.952811	0	0	0	Inf	0.996781	1	2.9	0.166	50.823	0.465978
GNE	4	1	0.237989	0.03	2.13	0.199254	0	0	0	Inf	0.993383	1	0.91	0.089	9.185	0.932996
GOLGA8B	0	0	-	-	-	-	0	-	-	-	-	0	-	-	-	-
GRM3	1	0	2.9291e-05	0	inf	0.930375	0	0	0	Inf	0.996954	0	0	0	Inf	0.994697
GRM6	12	16	1.29269	0.61	2.74	0.502451	1	0.731706	0.093	5.751	0.766507	7	1.54	0.589	4.007	0.380413
GSG2/HASPIN	0	0	-	-	-	-	0	-	-	-	-	0	-	-	-	-
GZMB	2	1	0.522848	0.05	5.78	0.596963	0	0	0	Inf	0.995693	1	0.91	0.082	10.042	0.938335
HCAR1	2	2	0.962055	0.14	6.85	0.969187	1	3.41311	0.291	39.996	0.328256	0	0	0	Inf	0.992427
HIST1H4E/H4C5	6	9	1.39142	0.5	3.92	0.531421	1	1.02837	0.122	8.704	0.97952	5	1.59	0.48	5.271	0.448149
HLA-DRB5	22	33	1.42241	0.83	2.44	0.202003	4	1.28994	0.434	3.83	0.646555	18	1.76	0.925	3.363	0.084677
HTN1	1	0	2.9291e-05	0	inf	0.930375	0	0	0	Inf	0.996954	0	0	0	Inf	0.994697
INPP5D	4	8	1.89056	0.57	6.29	0.299006	1	1.24817	0.139	11.189	0.842965	4	1.76	0.439	7.041	0.424986
IQGAP2	8	10	1.22852	0.48	3.12	0.665043	0	0	0	Inf	0.990984	3	0.8	0.208	3.043	0.738598
IRAK4	13	10	0.723611	0.32	1.65	0.442711	1	0.633867	0.081	4.936	0.663283	5	0.91	0.317	2.595	0.854785
ITGA10	13	15	1.10165	0.52	2.32	0.798848	3	1.61416	0.447	5.825	0.464642	6	0.98	0.364	2.628	0.964256
KIF18A	4	1	0.254762	0.03	2.28	0.221561	0	0	0	Inf	0.99365	1	0.47	0.052	4.203	0.498655
KIF4B	5	8	1.5995	0.52	4.9	0.410826	1	3.61077	0.316	41.199	0.301294	4	4.3	0.763	24.202	0.0982404
KRT36	32	31	0.940764	0.57	1.55	0.809316	4	0.901126	0.313	2.596	0.847064	15	1.04	0.553	1.97	0.895092
KRT40	3	6	1.82919	0.46	7.32	0.393187	2	4.97663	0.783	31.628	0.0889823	3	1.78	0.359	8.835	0.480175
LDHD	2	1	0.56345	0.05	6.21	0.639496	0	0	0	Inf	0.9955	0	0	0	Inf	0.99173
LIPC	6	6	1.0238	0.33	3.18	0.967587	1	1.54408	0.182	13.103	0.690499	1	0.31	0.037	2.591	0.280562
LRIG3	4	1	0.268335	0.03	2.4	0.239619	0	0	0	Inf	0.993517	0	0	0	Inf	0.98868
MAGI1	1	4	3.88978	0.43	34.83	0.224573	1	5.84539	0.362	94.516	0.213709	2	3.8	0.343	41.994	0.276592
MAK	2	4	1.82112	0.33	9.94	0.488833	0	0	0	Inf	0.995448	2	1.74	0.245	12.394	0.57824
MAP1S	1	0	2.29558e-05	0	inf	0.928754	0	0	0	Inf	0.996781	0	0	0	Inf	0.994676
MAPT	3	5	1.59343	0.38	6.68	0.524122	2	5.72562	0.91	36.02	0.0629428	2	1.39	0.226	8.591	0.721441
MARCO	4	9	2.06264	0.64	6.7	0.228566	2	2.82895	0.509	15.712	0.234537	3	1.32	0.295	5.904	0.716531
MCM5	2	0	9.53557e-06	0	inf	0.933616	0	0	0	Inf	0.995484	0	0	0	Inf	0.992485
METTL2A	2	1	0.481983	0.04	5.33	0.551688	0	0	0	Inf	0.995448	1	0.89	0.081	9.826	0.924423
MICAL1	21	22	0.9689	0.53	1.77	0.917793	7	2.09698	0.872	5.041	0.0979612	9	0.88	0.397	1.963	0.760222
MMP27	3	3	0.980406	0.2	4.87	0.980688	0	0	0	Inf	0.994634	2	1.79	0.286	11.225	0.532989
MST1L	24	21	0.875817	0.49	1.58	0.658493	3	1.0594	0.309	3.627	0.926781	7	0.71	0.295	1.688	0.43374
MYH7B	45	45	0.970802	0.64	1.47	0.888775	8	1.29464	0.6	2.792	0.510212	20	0.94	0.548	1.612	0.821287
NADSYN1	8	13	1.57464	0.65	3.81	0.313358	0	0	0	Inf	0.990891	8	1.89	0.704	5.077	0.206175
NEK1	11	7	0.624939	0.24	1.62	0.33191	0	0	0	Inf	0.989435	3	0.53	0.147	1.908	0.33087
NIPBL	6	5	0.741979	0.23	2.43	0.622448	2	1.66606	0.335	8.276	0.532526	1	0.29	0.035	2.412	0.252074
NLRP12	10	10	1.04606	0.43	2.52	0.920018	3	3.47754	0.872	13.874	0.077501	1	0.26	0.032	2.137	0.211335
NR3C2	0	1	0	0	inf	0.928664	0	-	-	-	-	1	0	0	Inf	0.994285
NUDT1	1	3	2.81662	0.29	27.06	0.369695	0	0	0	Inf	0.996781	0	0	0	Inf	0.994676
OPRM1	4	3	0.791716	0.18	3.55	0.760228	0	0	0	Inf	0.993908	0	0	0	Inf	0.989394
OR4F17	0	0	-	-	-	-	0	-	-	-	-	0	-	-	-	-
OTOP1	13	15	1.11167	0.53	2.34	0.780485	3	1.77915	0.495	6.388	0.377059	4	0.74	0.236	2.304	0.599284
PAK6	1	1	1.00653	0.06	16.18	0.996336	0	0	0	Inf	0.996781	1	1.8	0.113	28.812	0.67763
PBXIP1	3	6	1.99735	0.5	8	0.328649	0	0	0	Inf	0.994401	2	1.83	0.257	12.993	0.546735
PCBP4	1	0	2.29558e-05	0	inf	0.928754	0	0	0	Inf	0.996781	0	0	0	Inf	0.994676
PCK2	87	111	1.23507	0.93	1.64	0.144108	15	1.28213	0.73	2.253	0.387492	50	1.28	0.888	1.832	0.187341
PDCD11	3	2	0.653694	0.11	3.93	0.642072	0	0	0	Inf	0.994521	1	0.6	0.062	5.77	0.658003
PDS5B	1	0	2.29558e-05	0	inf	0.928754	0	0	0	Inf	0.996781	0	0	0	Inf	0.994676
PHF2	0	1	0	0	inf	0.930292	0	-	-	-	-	1	0	0	Inf	0.994307
PHRF1	3	3	0.915716	0.19	4.54	0.914172	0	0	0	Inf	0.994422	2	1.43	0.232	8.808	0.700347
PIK3CG	2	4	1.85901	0.34	10.17	0.474396	0	0	0	Inf	0.995484	1	0.89	0.081	9.826	0.924423
PINX1	2	4	1.94931	0.36	10.66	0.441349	0	0	0	Inf	0.995448	1	0.87	0.079	9.619	0.910609
PLD2	22	20	0.884365	0.48	1.62	0.691725	5	1.82361	0.673	4.942	0.237578	9	1.03	0.463	2.299	0.939067
POLR3A	9	6	0.644191	0.23	1.81	0.404893	1	1.07869	0.129	9.026	0.944287	1	0.34	0.041	2.803	0.314696
PRKCG	0	0	-	-	-	-	0	-	-	-	-	0	-	-	-	-
PRMT9	5	4	0.773281	0.21	2.89	0.701881	0	0	0	Inf	0.992922	2	0.84	0.16	4.374	0.832122
PRRC2C	3	9	2.94793	0.8	10.9	0.105096	1	2.76098	0.249	30.676	0.408429	4	3.68	0.673	20.125	0.13282
PTCH1	0	2		0	inf	0.934275	0	-	-	-	-	2	0	0	Inf	0.991388
PTK2B	1	3	2.80719	0.29	26.96	0.371188	0	0	0	Inf	0.996999	1	2.9	0.166	50.823	0.465978
PTPRN	1	3	3.079	0.32	29.63	0.330288	0	0	0	Inf	0.996999	3	7.28	0.722	73.339	0.0922353
PYROXD1	6	1	0.174632	0.02	1.45	0.106415	0	0	0	Inf	0.991933	0	0	0	Inf	0.985928
RAD1	12	15	1.20578	0.56	2.58	0.629961	2	1.49333	0.315	7.078	0.613481	8	1.96	0.741	5.195	0.175216
RASA2	4	3	0.765822	0.17	3.43	0.727255	0	0	0	Inf	0.99372	2	1.23	0.218	6.949	0.815093
RASEF	7	8	1.09054	0.4	3.01	0.867241	1	1.04694	0.123	8.891	0.966476	5	2.09	0.614	7.077	0.238553
RGS22	9	6	0.614167	0.22	1.73	0.355722	0	0	0	Inf	0.990185	2	0.44	0.093	2.065	0.296651
RIC1	10	7	0.628981	0.24	1.65	0.34736	1	0.546774	0.07	4.297	0.566018	3	0.56	0.153	2.045	0.379765
RNF181	4	5	1.20552	0.32	4.5	0.780964	0	0	0	Inf	0.993517	3	1.78	0.359	8.838	0.479503
SCN7A	5	12	2.27058	0.8	6.45	0.123714	2	2.58896	0.491	13.644	0.261959	6	2.14	0.653	7.032	0.208539
SEC23B	6	7	1.12537	0.38	3.36	0.832211	2	3.32045	0.587	18.797	0.174837	2	1.17	0.207	6.654	0.857129
SERPINB10	0	0	-	-	-	-	0	-	-	-	-	0	-	-	-	-
SERPINF1	2	1	0.481983	0.04	5.33	0.551688	0	0	0	Inf	0.995484	1	0.89	0.081	9.826	0.924423
SGSM3	1	5	4.96539	0.58	42.57	0.143817	0	0	0	Inf	0.996844	2	3.72	0.337	41.046	0.284063
SH2D6	1	1	0.890844	0.06	14.25	0.934871	1	4.99817	0.312	80.03	0.25547	0	0	0	Inf	0.994676
SIRT3	17	7	0.393328	0.16	0.95	0.0379456	2	1.01325	0.226	4.546	0.986282	3	0.48	0.135	1.684	0.250113
SLC10A6	2	3	1.4408	0.24	8.64	0.689471	0	0	0	Inf	0.995756	2	2.9	0.383	22.009	0.302422
SLC22A13	12	10	0.865215	0.37	2.01	0.736028	1	1.03942	0.129	8.38	0.97104	3	0.74	0.198	2.793	0.660221
SLC22A5	4	8	2.14721	0.65	7.15	0.21288	0	0	0	Inf	0.993523	0	0	0	Inf	0.988784
SLC2A8	16	21	1.25063	0.65	2.4	0.501585	1	0.495161	0.064	3.829	0.500657	12	1.9	0.857	4.229	0.113892
SLC4A7	5	0	8.4324e-06	0	inf	0.894482	0	0	0	Inf	0.992802	0	0	0	Inf	0.988095
SLC4A8	1	0	2.29558e-05	0	inf	0.928754	0	0	0	Inf	0.996781	0	0	0	Inf	0.994676
SLC4A9	12	14	1.09931	0.51	2.38	0.810183	0	0	0	Inf	0.988759	8	1.41	0.563	3.55	0.461058
SLX4	7	8	1.09911	0.4	3.04	0.85539	1	0.954664	0.115	7.934	0.965746	4	1.18	0.34	4.112	0.792167
SMARCAL1	7	11	1.46701	0.57	3.79	0.428682	2	1.61458	0.331	7.867	0.553211	3	0.83	0.213	3.246	0.790605
SPATA21	4	3	0.783012	0.18	3.51	0.749135	1	2.2156	0.24	20.48	0.483241	0		0	Inf	0.989306
SUPT3H	5	7	1.41278	0.45	4.46	0.555951	1	1.26083	0.144	11.018	0.834017	3	1.07	0.256	4.488	0.924833
SUPT6H	0	0	-	-	-	-	0	-	-	-	-	0	-	-	-	-
TAB1	2	2	1.01617	0.14	7.24	0.987223	0	0	0	Inf	0.99516	1	1.8	0.113	28.812	0.67763
TARDBP	0	0	-	-	-	-	0	-	-	-	-	0	-	-	-	-
TCF7	0	2	0	0	inf	0.934473	1	0	0	Inf	0.996133	0	-	-	-	-
TCF7L2	0	0	-	-	-	-	0	-	-	-	-	0	-	-	-	-
TIAM2	4	7	1.6327	0.48	5.59	0.434805	2	2.50092	0.457	13.688	0.29055	4	1.77	0.443	7.096	0.418477
TNC	6	2	0.304378	0.06	1.51	0.145161	0	0	0	Inf	0.991925	1	0.35	0.041	2.983	0.335739
TNK1	18	13	0.754088	0.37	1.54	0.439913	1	0.725471	0.092	5.712	0.760497	2	0.35	0.078	1.602	0.177501
TP53TG5	4	7	1.66262	0.49	5.69	0.41781	1	1.56721	0.171	14.348	0.69086	3	1.76	0.381	8.142	0.468771
TRIM42	5	3	0.594005	0.14	2.49	0.476411	0	0	0	Inf	0.993011	1	0.41	0.047	3.547	0.417277
TRIM63	16	13	0.773824	0.37	1.61	0.493271	2	0.813869	0.184	3.592	0.785725	4	0.51	0.169	1.556	0.238605
TRIO	14	18	1.15741	0.58	2.33	0.682436	2	0.740789	0.168	3.275	0.692344	11	1.38	0.623	3.037	0.430036
TRPM1	5	12	2.38104	0.84	6.77	0.10351	1	1.36507	0.156	11.972	0.778775	4	1.59	0.421	6.004	0.494158
TRPM4	77	63	0.78018	0.56	1.09	0.146868	11	0.980582	0.515	1.866	0.952359	26	0.68	0.435	1.076	0.100222
TSEN2	2	1	0.522848	0.05	5.78	0.596963	0		0	Inf	0.995484	1	0.91	0.082	10.042	0.938335
TTC6	86	99	1.13101	0.85	1.51	0.40789	11	1.02381	0.539	1.943	0.942643	52	1.3	0.913	1.858	0.144276
TXLNA	0	0	-	-	-	-	0	-	-	-	-	0	-	-	-	-
UBE2U	11	9	0.753399	0.31	1.82	0.529283	0	0	0	Inf	0.989321	3	0.57	0.156	2.064	0.390179
USP5	1	1	1.00653	0.06	16.18	0.996336	0	0	0	Inf	0.996954	0	0	0	Inf	0.994697
UVSSA	10	6	0.575609	0.21	1.59	0.285595	4	2.73718	0.828	9.047	0.0987804	1	0.2	0.025	1.565	0.124779
WRNIP1	0	3	0	0	inf	0.919625	0	-	-	-	-	3	0	0	Inf	0.989576
XDH	18	23	1.24591	0.67	2.31	0.486137	2	0.832316	0.189	3.656	0.807947	11	1.22	0.57	2.629	0.604634
ZBTB39	0	0	-	-	-	-	0	-	-	-	-	0	-	-	-	-
ZWINT	2	6	2.88717	0.58	14.32	0.194295	1	3.22764	0.281	37.055	0.346716	2	1.83	0.257	12.993	0.546735

## Sheet: Table 8B
Associations of rare missense variants in 178 genes idendified at the discovery stage and overall breast cancer risk and ER-negative and ER-positive breast cancer risk
		Overall					ER-negative					ER-positive
Gene	Number of carriers	Number of carriers	OR	95 %CI		p.val	Number of carriers	OR	95 %CI		p.val	Number of carriers	OR	95 %CI		p.val
	Controls (n=6019)	Cases (n=6211)					Cases (n=808)					Cases (n=2764)
ABCG2	17	15	0.838048	0.418	1.681	0.619	2	0.656633	0.151	2.858	0.575107	4	0.4343	0.146	1.295	0.135
ADAM29	0	5	0	0	inf	0.896	0	-	-	-	-	2	0	0	Inf	0.992
ADAMTS12	61	74	1.18186	0.84	1.663	0.337	6	0.724097	0.309	1.696	0.457289	36	1.26243	0.826	1.93	0.282
ADRA1A	11	15	1.26597	0.581	2.76	0.553	0	0	0	Inf	0.989372	9	1.52296	0.627	3.696	0.352
ADSSL1/ADSS1	22	34	1.48551	0.867	2.545	0.15	6	1.84005	0.735	4.607	0.19288	18	1.57087	0.837	2.947	0.159
AMFR	5	8	1.54828	0.506	4.742	0.444	1	1.47864	0.167	13.068	0.724989	2	0.790737	0.151	4.138	0.781
ANKK1	0	1	0	0	inf	0.93	1	0	0	Inf	0.996133	0	-	-	-	-
ANKRD53	3	2	0.643918	0.107	3.861	0.63	0	0	0	Inf	0.99449	0	0	0	Inf	0.991
ARHGEF10L	9	16	1.72904	0.763	3.919	0.19	3	2.43134	0.634	9.327	0.195269	7	1.68759	0.607	4.69	0.316
ARL14EP	0	2	0	0	inf	0.933	0	-	-	-	-	1		0	Inf	0.994
ASIP	1	1	0.937301	0.059	15.009	0.964	0	0	0	Inf	0.996781	1	1.8551	0.116	29.73	0.662
ATP2A1	54	54	0.98087	0.671	1.434	0.921	5	0.736353	0.29	1.868	0.519259	30	1.24169	0.782	1.972	0.359
ATP2C1	20	20	0.950099	0.51	1.769	0.872	3	1.0336	0.303	3.524	0.95788	6	0.612247	0.244	1.537	0.296
ATR	34	28	0.803168	0.486	1.327	0.392	1	0.223857	0.03	1.648	0.14174	14	0.892462	0.473	1.683	0.725
ATRIP	11	11	0.948598	0.41	2.192	0.902	1	0.552922	0.071	4.325	0.572338	5	0.850193	0.294	2.461	0.765
AUNIP	1	3	2.87534	0.299	27.648	0.36	0	0	0	Inf	0.996781	1	1.74362	0.109	27.896	0.694
BAZ1B	7	8	1.13053	0.409	3.124	0.813	2	2.2418	0.44	11.424	0.331224	3	0.908224	0.227	3.636	0.892
BLM	1	3	2.84998	0.296	27.421	0.365	0	0	0	Inf	0.996954	2	3.56465	0.323	39.343	0.3
BLOC1S2	1	0	0	0	inf	0.929	0	0	0	Inf	0.996781	0	0	0	Inf	0.995
BPTF	13	19	1.43684	0.708	2.915	0.315	2	1.04987	0.233	4.724	0.949435	9	1.36383	0.578	3.216	0.478
C2CD4A	0	1	0	0	inf	0.929	0	-	-	-	-	0	-	-	-	-
C4orf48	0	1	0	0	inf	0.93	0	-	-	-	-	0	-	-	-	-
C6orf211/ARMT1	3	4	1.37991	0.308	6.184	0.674	0	0	0	Inf	0.994521	2	1.2238	0.204	7.336	0.825
C6orf57/SDHAF4	15	5	0.311046	0.113	0.856	0.024	1	0.511858	0.067	3.937	0.519966	2	0.326232	0.073	1.449	0.141
CCDC11/CFAP53	0	2	0	0	inf	0.934	1	0	0	Inf	0.996133	0	-	-	-	-
CCDC66	8	6	0.732052	0.253	2.114	0.564	0	0	0	Inf	0.990874	3	0.901723	0.229	3.549	0.882
CCDC7	2	1	0.44526	0.04	4.908	0.509	1	2.49817	0.226	27.599	0.455061	0	0	0	Inf	0.992
CDK11A	0	0	-	-	-	-	0	-	-	-	-	0	-	-	-	-
CDS1	1	3	2.94846	0.307	28.342	0.349	0	0	0	Inf	0.996844	1	3.0878	0.18	53.018	0.437
CEACAM1	1	2	1.78227	0.162	19.646	0.637	0	0	0	Inf	0.996781	1	1.74362	0.109	27.896	0.694
CEP104	13	18	1.36557	0.668	2.792	0.393	4	2.47685	0.782	7.842	0.122981	5	0.88096	0.307	2.531	0.814
CEP55	4	2	0.510554	0.093	2.794	0.438	0	0	0	Inf	0.993673	0	0	0	Inf	0.989
CIDEB	1	4	3.68777	0.412	32.983	0.243	0	0	0	Inf	0.996781	4	9.19831	0.99	85.47	0.051
CLCN2	78	62	0.764634	0.546	1.07	0.117	10	0.887038	0.454	1.732	0.725521	30	0.781688	0.509	1.2	0.26
CLEC10A	0	1	0	0	inf	0.929	0	-	-	-	-	0	-	-	-	-
CLINT1	5	3	0.582763	0.139	2.443	0.46	1	1.93432	0.2	18.748	0.569146	2	1.42916	0.232	8.808	0.7
CLUH	45	29	0.619712	0.388	0.99	0.045	3	0.460623	0.142	1.497	0.197266	16	0.773282	0.432	1.384	0.386
COL5A2	40	31	0.76167	0.475	1.22	0.257	4	0.737606	0.261	2.088	0.566546	16	0.824747	0.457	1.489	0.523
CTBP1	6	1	0.167397	0.02	1.391	0.098	0	0	0	Inf	0.992219	0	0	0	Inf	0.987
DARS2	19	12	0.576913	0.28	1.19	0.136	0	0	0	Inf	0.985971	6	0.63023	0.249	1.593	0.329
DGAT2	3	7	2.23224	0.576	8.645	0.245	0	0	0	Inf	0.994169	3	2.65105	0.443	15.88	0.286
DHFRL1/DHFR2	0	0	-	-	-	-	0	-	-	-	-	0	-	-	-	-
DKKL1	1	2	2.14542	0.194	23.698	0.533	0	0	0	Inf	0.996954	1	1.86017	0.116	29.784	0.661
DLX6	5	2	0.397868	0.077	2.054	0.271	0	0	0	Inf	0.992891	2	0.806319	0.154	4.218	0.799
DNAH8	71	91	1.23863	0.906	1.694	0.18	10	1.02569	0.522	2.016	0.941351	42	1.31709	0.888	1.954	0.171
DNAJC11	5	3	0.550238	0.131	2.306	0.414	0	0	0	Inf	0.992804	3	1.05435	0.252	4.417	0.942
DUOX2	105	103	0.944627	0.718	1.243	0.684	17	1.19864	0.707	2.031	0.500757	45	0.963997	0.671	1.385	0.843
DYNC2H1	149	133	0.847506	0.669	1.074	0.171	14	0.638159	0.365	1.114	0.114307	72	0.994939	0.745	1.329	0.973
E4F1	1	4	3.64145	0.407	32.571	0.248	1	5.84539	0.362	94.516	0.213709	3	5.40496	0.561	52.034	0.144
EAF2	1	2	2.14542	0.194	23.698	0.533	1	13.2208	0.82	213.264	0.0687996	0	0	0	Inf	0.995
EEFSEC	15	16	0.986154	0.487	1.998	0.969	3	1.15042	0.33	4.015	0.826064	6	0.770698	0.297	2	0.592
EFCAB5	6	7	1.13731	0.381	3.391	0.817	2	2.61645	0.514	13.328	0.246898	4	1.44005	0.398	5.21	0.578
EGFR	26	19	0.69854	0.386	1.264	0.236	5	1.26194	0.477	3.34	0.639458	9	0.735356	0.339	1.593	0.436
EHHADH	20	19	0.926017	0.493	1.738	0.811	2	0.798037	0.182	3.507	0.765164	8	0.966993	0.411	2.274	0.939
ENO3	23	27	1.15613	0.662	2.02	0.61	2	0.768808	0.178	3.327	0.725008	11	1.11054	0.53	2.329	0.781
EPHA10	18	13	0.680803	0.333	1.392	0.292	4	1.60358	0.533	4.828	0.401046	5	0.567204	0.209	1.542	0.266
EPS8L2	30	31	1.00694	0.608	1.667	0.979	4	1.06799	0.367	3.108	0.903928	15	1.1472	0.601	2.188	0.677
ERCC4	26	18	0.677949	0.371	1.239	0.206	2	0.573587	0.134	2.453	0.453479	9	0.744554	0.344	1.613	0.454
ERCC6	23	21	0.889441	0.491	1.61	0.699	2	0.585358	0.136	2.515	0.471495	10	0.925389	0.434	1.972	0.841
FAM83B	12	9	0.738854	0.311	1.757	0.494	1	0.582528	0.074	4.562	0.606819	5	0.817058	0.284	2.355	0.708
FANCA	174	173	0.954666	0.771	1.182	0.671	25	1.02337	0.664	1.576	0.916488	76	0.928891	0.703	1.228	0.604
FANCD2OS	30	21	0.694101	0.397	1.215	0.201	1	0.269681	0.036	2	0.199811	10	0.695079	0.335	1.442	0.328
FARP2	40	42	1.00412	0.65	1.551	0.985	2	0.321172	0.077	1.338	0.118765	23	1.14671	0.681	1.931	0.607
FBXO11	13	10	0.731366	0.32	1.671	0.458	0	0	0	Inf	0.9882	4	0.717364	0.226	2.275	0.573
FGFR3	44	37	0.830165	0.535	1.288	0.406	5	0.88666	0.346	2.271	0.802042	16	0.80873	0.45	1.454	0.478
FHL3	37	40	1.04461	0.667	1.637	0.849	7	1.34353	0.59	3.059	0.481717	16	0.901966	0.496	1.639	0.735
FIGNL1	30	19	0.622959	0.35	1.109	0.108	1	0.20977	0.028	1.545	0.125322	7	0.424363	0.186	0.968	0.042
FOXM1	19	12	0.638777	0.31	1.318	0.225	2	0.925581	0.211	4.064	0.918406	5	0.601254	0.22	1.642	0.321
FRMPD1	13	6	0.457763	0.174	1.206	0.114	0	0	0	Inf	0.988525	4	0.670076	0.216	2.083	0.489
GINS4	10	9	0.900058	0.365	2.22	0.819	1	0.701594	0.088	5.577	0.737585	4	0.858543	0.265	2.78	0.799
GNE	40	50	1.24067	0.817	1.884	0.312	5	1.01101	0.393	2.603	0.981891	20	1.09594	0.632	1.901	0.745
GOLGA8B	0	0	-	-	-	-	0	-	-	-	-	0	-	-	-	-
GRM3	23	19	0.803235	0.437	1.477	0.481	2	0.614151	0.143	2.636	0.511925	9	0.778475	0.357	1.698	0.529
GRM6	61	67	1.07102	0.755	1.519	0.7	7	0.951519	0.428	2.115	0.902945	36	1.38306	0.899	2.127	0.14
GSG2/HASPIN	0	0	-	-	-	-	0	-	-	-	-	0	-	-	-	-
GZMB	9	6	0.655189	0.233	1.844	0.423	0	0	0	Inf	0.99064	2	0.6923	0.143	3.356	0.648
HCAR1	6	4	0.639748	0.18	2.271	0.489	0	0	0	Inf	0.992149	3	1.20067	0.291	4.948	0.8
HIST1H4E/H4C5	5	4	0.777836	0.208	2.904	0.709	1	1.28871	0.147	11.31	0.81896	3	1.07139	0.256	4.488	0.925
HLA-DRB5	0	0	-	-	-	-	0	-	-	-	-	0	-	-	-	-
HTN1	0	0	-	-	-	-	0	-	-	-	-	0	-	-	-	-
INPP5D	15	16	1.03322	0.51	2.093	0.928	1	0.48455	0.063	3.714	0.485644	7	1.01939	0.41	2.536	0.967
IQGAP2	26	27	1.00086	0.583	1.718	0.998	6	1.54333	0.626	3.806	0.346133	7	0.513263	0.221	1.19	0.12
IRAK4	28	25	0.868395	0.505	1.492	0.609	2	0.582725	0.136	2.491	0.466274	12	1.01083	0.501	2.038	0.976
ITGA10	148	143	0.946225	0.75	1.195	0.642	19	0.979682	0.6	1.599	0.934547	61	0.87519	0.644	1.19	0.395
KIF18A	10	5	0.494955	0.169	1.451	0.2	2	1.40347	0.302	6.53	0.665681	2	0.384559	0.084	1.764	0.219
KIF4B	2	2	0.943353	0.133	6.704	0.954	0	0	0	Inf	0.995472	1	1.6609	0.141	19.627	0.687
KRT36	2	4	1.91058	0.35	10.443	0.455	0	0	0	Inf	0.995579	0	0	0	Inf	0.993
KRT40	16	17	1.00611	0.507	1.995	0.986	2	0.802633	0.182	3.538	0.771446	10	1.20119	0.539	2.678	0.654
LDHD	18	22	1.1664	0.625	2.178	0.629	3	1.18244	0.341	4.101	0.791694	9	1.19006	0.522	2.714	0.679
LIPC	57	72	1.192	0.84	1.691	0.325	11	1.27095	0.659	2.451	0.474317	31	1.0785	0.691	1.683	0.739
LRIG3	17	17	0.933845	0.476	1.832	0.842	1	0.347189	0.046	2.626	0.305525	8	0.89843	0.385	2.094	0.804
MAGI1	15	26	1.67511	0.886	3.167	0.112	3	1.55371	0.438	5.513	0.495264	9	1.41293	0.602	3.314	0.427
MAK	8	2	0.246915	0.052	1.164	0.077	1	1.04065	0.125	8.662	0.970598	1	0.308753	0.037	2.546	0.275
MAP1S	2	2	0.913753	0.129	6.494	0.928	0	0	0	Inf	0.995448	2	1.79872	0.253	12.789	0.557
MAPT	26	19	0.709561	0.392	1.285	0.257	1	0.269977	0.036	2.01	0.201076	10	0.815961	0.387	1.718	0.592
MARCO	17	13	0.721835	0.35	1.489	0.377	4	1.39615	0.465	4.195	0.552169	7	0.787751	0.325	1.911	0.598
MCM5	19	20	1.00586	0.536	1.888	0.985	4	1.43166	0.48	4.27	0.51981	10	1.02626	0.474	2.223	0.948
METTL2A	0	0	-	-	-	-	0	-	-	-	-	0	-	-	-	-
MICAL1	14	21	1.48795	0.755	2.932	0.251	2	1.14263	0.25	5.214	0.863326	9	1.6217	0.666	3.95	0.287
MMP27	4	2	0.449872	0.082	2.456	0.356	0		0	Inf	0.993552	2	1.00422	0.18	5.6	0.996
MST1L	0	0	-	-	-	-	0	-	-	-	-	0	-	-	-	-
MYH7B	73	97	1.27562	0.939	1.733	0.119	6	0.530466	0.229	1.229	0.139098	48	1.33556	0.921	1.936	0.127
NADSYN1	33	33	0.967552	0.596	1.571	0.894	4	0.821156	0.286	2.356	0.714102	12	0.767628	0.39	1.51	0.444
NEK1	24	15	0.604551	0.317	1.154	0.127	3	0.848636	0.253	2.849	0.790567	8	0.665727	0.297	1.492	0.323
NIPBL	52	36	0.654946	0.427	1.004	0.052	4	0.529755	0.19	1.479	0.225217	16	0.627204	0.355	1.108	0.108
NLRP12	20	16	0.764174	0.395	1.477	0.424	4	1.47687	0.497	4.392	0.48315	4	0.43465	0.147	1.285	0.132
NR3C2	0	3	0	0	inf	0.919	1	0	0	Inf	0.996068	0	-	-	-	-
NUDT1	3	4	1.38738	0.31	6.217	0.669	2	5.50602	0.881	34.409	0.0680735	2	1.23817	0.207	7.421	0.815
OPRM1	13	14	1.0524	0.494	2.244	0.895	1	0.476876	0.062	3.679	0.477497	8	1.24769	0.511	3.044	0.627
OR4F17	0	0	-	-	-	-	0	-	-	-	-	0	-	-	-	-
OTOP1	0	1	0	0	inf	0.93	0	-	-	-	-	1	0	0	Inf	0.994
PAK6	8	13	1.58077	0.654	3.82	0.309	2	1.58597	0.33	7.631	0.565042	6	1.53272	0.524	4.48	0.435
PBXIP1	1	1	1.00653	0.063	16.182	0.996	1	7.67912	0.45	131.186	0.159201	0	0	0	Inf	0.995
PCBP4	3	3	1.06637	0.215	5.295	0.937	0	0	0	Inf	0.994745	2	1.77121	0.283	11.103	0.542
PCK2	32	33	1.01461	0.622	1.654	0.954	3	0.763679	0.23	2.532	0.659278	18	1.17565	0.652	2.119	0.59
PDCD11	19	17	0.876304	0.455	1.689	0.693	1	0.42739	0.056	3.251	0.41159	8	0.927966	0.397	2.168	0.863
PDS5B	15	11	0.713478	0.327	1.556	0.396	1	0.475762	0.062	3.657	0.475334	2	0.295247	0.067	1.31	0.108
PHF2	8	6	0.737462	0.255	2.13	0.574	3	3.40653	0.853	13.597	0.0826341	2	0.617865	0.126	3.024	0.552
PHRF1	5	6	1.13766	0.347	3.735	0.832	2	2.91111	0.543	15.618	0.212513	3	1.17577	0.277	4.995	0.826
PIK3CG	11	19	1.68345	0.8	3.543	0.17	2	1.19359	0.261	5.465	0.819653	10	1.73078	0.731	4.098	0.212
PINX1	14	12	0.819363	0.378	1.775	0.613	1	0.579646	0.075	4.479	0.601182	6	1.04055	0.392	2.764	0.936
PLD2	17	18	1.01656	0.523	1.976	0.961	1	0.392964	0.052	2.981	0.366279	9	1.04611	0.463	2.366	0.914
POLR3A	83	87	1.01975	0.753	1.381	0.899	8	0.693076	0.331	1.45	0.330294	36	0.93313	0.623	1.397	0.737
PRKCG	4	3	0.803552	0.179	3.598	0.775	0	0	0	Inf	0.993787	0	0	0	Inf	0.989
PRMT9	10	13	1.23441	0.54	2.82	0.617	1	0.585935	0.074	4.639	0.612589	6	1.20681	0.429	3.396	0.722
PRRC2C	5	5	0.910368	0.263	3.15	0.882	1	1.24817	0.139	11.189	0.842965	3	1.30795	0.292	5.851	0.725
PTCH1	50	52	1.01817	0.689	1.504	0.928	5	0.786259	0.309	2	0.613723	29	1.3288	0.827	2.136	0.24
PTK2B	19	22	1.0972	0.593	2.03	0.768	3	1.22098	0.35	4.253	0.753872	8	1.1148	0.47	2.646	0.805
PTPRN	11	10	0.866684	0.367	2.044	0.744	0	0	0	Inf	0.98934	4	0.687662	0.218	2.171	0.523
PYROXD1	7	13	1.86592	0.743	4.685	0.184	1	1.5254	0.178	13.084	0.700176	6	2.29661	0.722	7.31	0.159
RAD1	2	2	0.971286	0.136	6.912	0.977	0	0	0	Inf	0.99516	0	0	0	Inf	0.992
RASA2	6	9	1.41886	0.504	3.992	0.507	1	1.09908	0.129	9.333	0.931019	4	1.31073	0.366	4.699	0.678
RASEF	12	7	0.570536	0.224	1.452	0.239	0	0	0	Inf	0.988922	3	0.495003	0.139	1.768	0.279
RGS22	8	2	0.232817	0.049	1.097	0.065	0	0	0	Inf	0.990893	1	0.220612	0.028	1.765	0.154
RIC1	27	40	1.47147	0.901	2.402	0.123	5	1.4563	0.546	3.884	0.452653	15	1.31198	0.679	2.533	0.419
RNF181	4	3	0.707847	0.158	3.168	0.651	0	0	0	Inf	0.993591	0	0	0	Inf	0.989
SCN7A	46	33	0.703626	0.449	1.103	0.125	7	1.31969	0.581	2.996	0.507325	15	0.832038	0.453	1.527	0.553
SEC23B	42	46	1.0755	0.706	1.638	0.734	4	0.719413	0.254	2.036	0.535046	26	1.36386	0.821	2.265	0.23
SERPINB10	5	8	1.49138	0.487	4.564	0.484	0	0	0	Inf	0.99286	5	2.17689	0.615	7.705	0.228
SERPINF1	19	17	0.868717	0.451	1.674	0.674	1	0.442136	0.058	3.372	0.431064	8	1.03814	0.439	2.453	0.932
SGSM3	25	8	0.300915	0.136	0.668	0.003	2	0.533499	0.125	2.278	0.39632	3	0.253694	0.076	0.848	0.026
SH2D6	2	3	1.40467	0.234	8.427	0.71	0	0	0	Inf	0.995484	1	0.890278	0.081	9.826	0.924
SIRT3	24	12	0.476981	0.238	0.955	0.037	2	0.670141	0.155	2.895	0.591832	7	0.682925	0.288	1.622	0.387
SLC10A6	2	3	1.4408	0.24	8.641	0.689	0	0	0	Inf	0.995472	2	2.26834	0.306	16.84	0.423
SLC22A13	10	10	1.00052	0.416	2.409	0.999	1	0.855689	0.107	6.812	0.882941	5	1.01464	0.343	3.001	0.979
SLC22A5	29	41	1.37862	0.855	2.223	0.188	4	1.06068	0.366	3.073	0.913558	19	1.44911	0.798	2.63	0.223
SLC2A8	33	32	0.926143	0.568	1.509	0.758	5	0.967953	0.374	2.505	0.946464	12	0.752327	0.385	1.469	0.404
SLC4A7	20	28	1.39473	0.784	2.481	0.258	3	0	0.296	3.421	0.992884	15	1.44281	0.735	2.833	0.287
SLC4A8	14	14	0.925459	0.441	1.944	0.838	2	0.935999	0.209	4.185	0.931024	7	1.08907	0.433	2.742	0.856
SLC4A9	39	43	1.02678	0.664	1.587	0.905	9	1.49768	0.715	3.139	0.284629	18	0.932173	0.527	1.649	0.809
SLX4	5	2	0.368075	0.071	1.898	0.232	0	0	0	Inf	0.992804	1	0.352005	0.041	3.015	0.341
SMARCAL1	61	71	1.13252	0.802	1.599	0.479	9	0	0.489	2.027	0.991462	40	1.27472	0.85	1.913	0.241
SPATA21	2	2	0.913753	0.129	6.494	0.928	1	2.76098	0.249	30.676	0.408429	0	0	0	Inf	0.992
SUPT3H	5	4	0.737995	0.198	2.753	0.651	1	1.04671	0.122	8.99	0.966813	1	0.355287	0.041	3.044	0.345
SUPT6H	32	23	0.706365	0.413	1.209	0.205	0	1.94461e-07	0	Inf	0.981847	13	0.91168	0.471	1.764	0.784
TAB1	5	10	1.97642	0.674	5.792	0.214	0	0	0	Inf	0.992896	6	2.37489	0.716	7.879	0.157
TARDBP	1	2	1.78227	0.162	19.646	0.637	1	4.99817	0.312	80.03	0.25547	1	1.74362	0.109	27.896	0.694
TCF7	16	12	0.709848	0.335	1.503	0.371	1	0.405976	0.053	3.095	0.384405	6	0.719643	0.279	1.857	0.496
TCF7L2	14	23	1.60648	0.825	3.127	0.163	2	1.22206	0.268	5.572	0.795597	11	1.94558	0.846	4.474	0.117
TIAM2	24	31	1.23956	0.726	2.116	0.431	2	0.507166	0.119	2.163	0.358984	14	1.11816	0.575	2.174	0.742
TNC	33	31	0.913918	0.559	1.495	0.72	4	0.956237	0.333	2.748	0.933779	15	0.989165	0.529	1.851	0.973
TNK1	6	7	1.10839	0.372	3.304	0.853	1	1.13352	0.134	9.592	0.908427	3	0.991323	0.245	4.011	0.99
TP53TG5	0	0	-	-	-	-	0	-	-	-	-	0	-	-	-	-
TRIM42	6	3	0.460099	0.115	1.841	0.273	1	1.02837	0.122	8.704	0.97952	2	0.646375	0.129	3.24	0.596
TRIM63	5	8	1.55914	0.509	4.776	0.437	0	0	0	Inf	0.992804	6	2.15571	0.657	7.072	0.205
TRIO	42	43	0.997102	0.65	1.529	0.989	8	1.37621	0.637	2.973	0.416538	24	1.2072	0.724	2.014	0.471
TRPM1	43	41	0.961359	0.625	1.478	0.858	6	1.4675	0.605	3.559	0.396161	18	1.0966	0.613	1.962	0.756
TRPM4	26	26	0.969547	0.562	1.673	0.912	2	0.575651	0.134	2.466	0.456832	8	0.667191	0.297	1.5	0.328
TSEN2	4	7	1.83703	0.536	6.292	0.333	0	0	0	Inf	0.993613	4	1.83206	0.457	7.339	0.393
TTC6	6	6	0.989115	0.318	3.074	0.985	0	0	0	Inf	0.991984	5	1.83455	0.53	6.348	0.338
TXLNA	8	3	0.371293	0.098	1.401	0.144	0	0	0	Inf	0.990603	1	0.295513	0.036	2.456	0.259
UBE2U	2	0	0	0	inf	0.933	0	0	0	Inf	0.995448	0	0	0	Inf	0.992
USP5	9	12	1.30935	0.55	3.114	0.542	0	0	0	Inf	0.990082	8	2.16711	0.779	6.028	0.138
UVSSA	13	4	0.301231	0.098	0.924	0.036	0	0	0	Inf	0.988295	1	0.183315	0.024	1.429	0.105
WRNIP1	20	24	1.13655	0.627	2.061	0.673	2	0.659879	0.153	2.853	0.577908	12	1.23009	0.595	2.542	0.576
XDH	46	45	0.960561	0.635	1.452	0.849	5	0.883718	0.345	2.266	0.796975	25	1.31742	0.791	2.195	0.29
ZBTB39	5	7	1.38622	0.439	4.376	0.578	0	0	0	Inf	0.993129	5	3.00302	0.836	10.784	0.092
ZWINT	1	1	1.03913	0.065	16.671	0.978	0	0	0	Inf	0.996954	0	0	0	Inf	0.995

## Sheet: Table 8C
Associations of loss of function and rare missense variants in 178 genes idendified at the discovery stage with overall breast cancer risk and ER-negative and ER-positive breast cancer risk
		Overall					ER-negative					ER-positive
Gene	Number of carriers	Number of carriers	OR	95 %CI		p-value	Number of carriers	OR	95 %CI		p-value	Number of carriers	OR	95 %CI		p-value
	Controls (n=6019)	Cases (n=6211)					Cases (n=808)					Cases (n=2764)
ABCG2	26	32	1.18394	0.704	1.99	0.52395	5	1.24625	0.472	3.289	0.65659	9	0.692584	0.32	1.49	0.348
ADAM29	0	5	0	0	inf	0.896307	0	-	-	-	-	2	0	0	Inf	0.991948
ADAMTS12	70	82	1.14493	0.83	1.579	0.409327	7	0.746827	0.339	1.646	0.46898	41	1.26449	0.85	1.88	0.24883
ADRA1A	22	23	0.975772	0.543	1.754	0.934653	2	0.5407	0.126	2.315	0.407331	11	0.911988	0.44	1.89	0.803885
ADSSL1/ADSS1	27	39	1.39695	0.853	2.287	0.183691	6	1.48911	0.607	3.655	0.384828	20	1.40964	0.79	2.53	0.248779
AMFR	6	10	1.61979	0.588	4.465	0.351192	1	1.32988	0.155	11.408	0.794876	4	1.41173	0.39	5.11	0.599377
ANKK1	11	16	1.45901	0.676	3.151	0.336175	4	2.57734	0.805	8.256	0.110963	8	1.38453	0.55	3.46	0.48649
ANKRD53	4	5	1.16591	0.313	4.349	0.819212	0	0	0	Inf	0.993604	3	1.34316	0.3	6.01	0.699527
ARHGEF10L	12	19	1.53712	0.745	3.172	0.244841	3	1.75034	0.481	6.368	0.395555	8	1.37487	0.55	3.44	0.495879
ARL14EP	0	2	0	0	inf	0.933464	0	-	-	-	-	1	0	0	Inf	0.994285
ASIP	1	1	0.937301	0.059	15.009	0.963502	0	0	0	Inf	0.996781	1	1.8551	0.12	29.73	0.662425
ATP2A1	67	70	1.01491	0.724	1.422	0.931462	6	0.696891	0.298	1.627	0.403845	42	1.38127	0.93	2.06	0.113451
ATP2C1	21	21	0.94716	0.516	1.737	0.860751	3	0.968419	0.285	3.287	0.958951	6	0.578958	0.23	1.45	0.241634
ATR	49	49	0.955025	0.641	1.422	0.82077	5	0.726567	0.286	1.845	0.501811	24	1.037	0.63	1.71	0.886601
ATRIP	15	21	1.33271	0.686	2.59	0.396964	2	0.764161	0.173	3.369	0.722343	10	1.22896	0.55	2.75	0.615455
AUNIP	12	13	1.02339	0.466	2.247	0.954049	0	0	0	Inf	0.988729	5	0.889124	0.31	2.59	0.82913
BAZ1B	8	8	0.986208	0.369	2.633	0.977882	2	2.05646	0.414	10.204	0.377682	3	0.842192	0.22	3.29	0.804789
BLM	15	24	1.4986	0.785	2.862	0.220296	2	0.939474	0.212	4.168	0.934536	12	1.52986	0.71	3.29	0.276533
BLOC1S2	6	2	0.323961	0.065	1.607	0.167754	0	0	0	Inf	0.992115	0	1.12382e-07	0	Inf	0.986966
BPTF	18	24	1.32249	0.716	2.442	0.371591	3	1.26467	0.365	4.377	0.710868	11	1.34583	0.62	2.9	0.448838
C2CD4A	0	1	0	0	inf	0.928824	0	-	-	-	-	0	-	-	-	-
C4orf48	1	2	1.8207	0.165	20.072	0.624605	0	0	0	Inf	0.996781	1	1.74362	0.11	27.9	0.694299
C6orf211/ARMT1	9	8	0.874301	0.337	2.271	0.782699	1	0.833496	0.104	6.699	0.864001	4	0.858286	0.26	2.81	0.800421
C6orf57/SDHAF4	17	5	0.276075	0.102	0.749	0.0114441	1	0.446541	0.059	3.402	0.436445	2	0.276791	0.06	1.21	0.0884924
CCDC11/CFAP53	2	4	1.88449	0.345	10.293	0.464466	1	3.06955	0.275	34.221	0.361976	0	0	0	Inf	0.992528
CCDC66	135	114	0.820045	0.637	1.055	0.123118	16	0.897847	0.528	1.526	0.690403	51	0.839994	0.6	1.17	0.303256
CCDC7	6	4	0.597251	0.168	2.118	0.4249	1	0.927719	0.11	7.798	0.944931	3	0.956418	0.24	3.87	0.950195
CDK11A	22	22	0.976132	0.54	1.766	0.936353	7	2.04534	0.863	4.85	0.104309	5	0.420572	0.16	1.11	0.0812578
CDS1	4	4	0.934565	0.233	3.743	0.923838	0	0	0	Inf	0.993581	1	0.522875	0.06	4.77	0.565346
CEACAM1	2	5	2.3114	0.448	11.921	0.316803	0	0	0	Inf	0.995448	4	3.52908	0.65	19.29	0.145587
CEP104	20	34	1.66764	0.958	2.902	0.0704799	5	1.82883	0.669	4.996	0.239077	13	1.43308	0.7	2.95	0.327975
CEP55	14	10	0.706898	0.313	1.595	0.403299	1	0.526193	0.068	4.051	0.537516	4	0.584394	0.19	1.79	0.347536
CIDEB	17	18	0.992004	0.51	1.928	0.981107	2	0.689081	0.158	3.006	0.620237	8	0.902713	0.39	2.11	0.812688
CLCN2	88	67	0.732743	0.532	1.009	0.0570241	12	0.961169	0.52	1.776	0.89943	30	0.702857	0.46	1.07	0.101487
CLEC10A	11	8	0.672394	0.27	1.674	0.393771	0	0	0	Inf	0.989322	4	0.672767	0.21	2.13	0.499442
CLINT1	6	3	0.492258	0.123	1.972	0.316769	1	1.93432	0.2	18.748	0.569146	2	1.42916	0.23	8.81	0.700347
CLUH	48	30	0.600457	0.38	0.949	0.029054	3	0.442092	0.136	1.434	0.173916	17	0.78932	0.45	1.39	0.412703
COL5A2	40	33	0.809013	0.509	1.286	0.369749	4	0.737606	0.261	2.088	0.566546	17	0.875538	0.49	1.56	0.65251
CTBP1	7	5	0.683429	0.217	2.157	0.516347	0	0	0	Inf	0.991557	3	0.831507	0.21	3.25	0.790605
DARS2	24	20	0.761815	0.42	1.381	0.370162	1	0.262338	0.035	1.953	0.191392	11	0.95674	0.46	1.98	0.904847
DGAT2	17	14	0.805626	0.396	1.638	0.550406	0	0	0	Inf	0.986631	8	1.29701	0.53	3.15	0.565517
DHFRL1/DHFR2	0	0	-	-	-	-	0	-	-	-	-	0	-	-	-	-
DKKL1	2	2	1.08719	0.153	7.737	0.933464	0	0	0	Inf	0.995693	1	0.929379	0.08	10.27	0.95235
DLX6	5	2	0.397868	0.077	2.054	0.271057	0		0	Inf	0.992891	2	0.806319	0.15	4.22	0.798712
DNAH8	114	124	1.04794	0.81	1.355	0.721204	12	0.74741	0.408	1.37	0.346489	54	1.03701	0.74	1.45	0.831537
DNAJC11	5	3	0.550238	0.131	2.306	0.413843	0	0	0	Inf	0.992804	3	1.05435	0.25	4.42	0.94227
DUOX2	200	162	0.77287	0.626	0.954	0.016486	19	0.697419	0.431	1.129	0.142864	71	0.787253	0.59	1.04	0.0953682
DYNC2H1	164	156	0.90251	0.722	1.127	0.366368	16	0.651631	0.386	1.099	0.108466	85	1.0562	0.81	1.38	0.691682
E4F1	3	5	1.55222	0.37	6.505	0.547565	1	2.16178	0.22	21.283	0.508807	4	2.39011	0.53	10.69	0.25432
EAF2	4	3	0.722167	0.161	3.235	0.670501	1	1.71823	0.185	15.916	0.633648	0	0	0	Inf	0.989242
EEFSEC	19	20	0.991538	0.528	1.861	0.978894	3	0.977596	0.286	3.342	0.971182	8	0.828418	0.36	1.91	0.6579
EFCAB5	37	34	0.894652	0.56	1.428	0.640804	3	0.710027	0.216	2.333	0.572642	19	1.12795	0.64	1.99	0.676498
EGFR	26	20	0.738265	0.411	1.325	0.309136	5	1.26194	0.477	3.34	0.639458	9	0.735356	0.34	1.59	0.435722
EHHADH	23	20	0.853415	0.468	1.557	0.605344	2	0.739714	0.169	3.232	0.688639	9	1.01892	0.45	2.3	0.963998
ENO3	31	39	1.25199	0.78	2.011	0.352497	3	0.835181	0.251	2.778	0.768996	16	1.16232	0.63	2.16	0.634422
EPHA10	28	23	0.777175	0.447	1.351	0.371868	5	1.17133	0.447	3.07	0.747716	10	0.697633	0.34	1.45	0.332348
EPS8L2	33	38	1.12223	0.702	1.793	0.629487	5	1.18924	0.454	3.118	0.724525	20	1.356	0.76	2.42	0.302532
ERCC4	30	22	0.714203	0.411	1.24	0.23212	2	0.492275	0.116	2.087	0.336144	11	0.76684	0.38	1.55	0.459402
ERCC6	34	32	0.915537	0.564	1.487	0.721247	4	0.825065	0.288	2.361	0.720023	15	0.945629	0.51	1.76	0.860358
FAM83B	13	9	0.678578	0.289	1.591	0.372322	1	0.522148	0.067	4.055	0.534354	5	0.747395	0.26	2.12	0.58486
FANCA	186	180	0.928727	0.754	1.144	0.486701	27	1.03102	0.68	1.563	0.88561	78	0.886896	0.68	1.17	0.389699
FANCD2OS	32	23	0.714382	0.417	1.223	0.220433	1	0.246516	0.033	1.822	0.170012	11	0.711223	0.35	1.43	0.338539
FARP2	52	62	1.14403	0.79	1.658	0.476931	6	0.709237	0.302	1.665	0.430238	30	1.11997	0.71	1.77	0.626363
FBXO11	14	10	0.677022	0.3	1.527	0.347132	0	0	0	Inf	0.987759	4	0.651334	0.21	2.04	0.461156
FGFR3	45	37	0.810487	0.524	1.255	0.346077	5	0.85683	0.335	2.191	0.74703	16	0.786355	0.44	1.41	0.420156
FHL3	38	42	1.07119	0.689	1.665	0.759842	8	1.50245	0.69	3.27	0.304898	16	0.874213	0.48	1.59	0.657795
FIGNL1	31	19	0.601454	0.339	1.067	0.0821091	1	0.201266	0.027	1.481	0.115397	7	0.41008	0.18	0.93	0.0335317
FOXM1	19	13	0.689499	0.34	1.399	0.302945	3	1.3635	0.393	4.729	0.625128	5	0.601254	0.22	1.64	0.321083
FRMPD1	16	9	0.556003	0.245	1.26	0.159725	0		0	Inf	0.987268	6	0.784061	0.3	2.03	0.615371
GINS4	11	10	0.901893	0.382	2.128	0.813666	1	0.616297	0.078	4.846	0.645498	5	1.00812	0.34	2.95	0.98824
GNE	44	51	1.14735	0.765	1.721	0.506417	5	0.924474	0.361	2.369	0.870067	21	1.08442	0.64	1.85	0.766914
GOLGA8B	0	0	-	-	-	-	0	-	-	-	-	0	-	-	-	-
GRM3	24	19	0.772344	0.422	1.412	0.401608	2	0.59773	0.14	2.559	0.487978	9	0.743643	0.34	1.61	0.453825
GRM6	73	83	1.10822	0.807	1.521	0.525128	8	0.916248	0.435	1.93	0.818031	43	1.40916	0.95	2.09	0.0877938
GSG2/HASPIN	0	0	-	-	-	-	0	-	-	-	-	0	-	-	-	-
GZMB	11	7	0.631776	0.244	1.633	0.343194	0	0	0	Inf	0.989697	3	0.749215	0.2	2.79	0.666497
HCAR1	8	6	0.720119	0.249	2.079	0.543848	1	0.847122	0.104	6.909	0.876868	3	0.912253	0.24	3.53	0.894209
HIST1H4E/H4C5	11	13	1.11606	0.499	2.496	0.789154	2	1.14441	0.25	5.248	0.862178	8	1.34772	0.54	3.37	0.52336
HLA-DRB5	22	33	1.42241	0.828	2.444	0.202003	4	1.28994	0.434	3.83	0.646555	18	1.76398	0.93	3.36	0.084677
HTN1	1	0	2.9291e-05	0	inf	0.930375	0	0	0	Inf	0.996954	0	1.18683e-07	0	Inf	0.994697
INPP5D	19	24	1.21569	0.665	2.223	0.525992	2	0.694209	0.16	3.015	0.626169	11	1.19679	0.56	2.54	0.640222
IQGAP2	34	37	1.05427	0.66	1.683	0.824692	6	1.17316	0.487	2.828	0.722016	10	0.57497	0.28	1.17	0.127427
IRAK4	41	35	0.821431	0.522	1.292	0.394715	3	0.598256	0.183	1.961	0.396268	17	0.976972	0.55	1.75	0.93765
ITGA10	161	158	0.959018	0.767	1.198	0.712767	22	1.03586	0.655	1.638	0.880166	67	0.883178	0.66	1.19	0.407339
KIF18A	14	6	0.427001	0.164	1.113	0.0816119	2	0.995396	0.223	4.44	0.995173	3	0.408858	0.12	1.43	0.161065
KIF4B	7	10	1.40871	0.535	3.708	0.48765	1	1.84596	0.2	17.055	0.588948	5	3.1293	0.81	12.11	0.0984523
KRT36	34	35	0.998561	0.622	1.604	0.995248	4	0.886217	0.308	2.548	0.822616	15	1.02458	0.54	1.93	0.939999
KRT40	19	23	1.13842	0.619	2.094	0.676701	4	1.39217	0.466	4.162	0.553724	13	1.29906	0.64	2.66	0.473449
LDHD	20	23	1.11013	0.609	2.025	0.733346	3	1.14064	0.331	3.935	0.835006	9	1.11307	0.49	2.52	0.796829
LIPC	63	78	1.17671	0.842	1.644	0.340291	12	1.29171	0.689	2.422	0.424971	32	1.00077	0.65	1.54	0.997212
LRIG3	21	18	0.814511	0.433	1.532	0.524225	1	0.307024	0.041	2.303	0.250773	8	0.758011	0.33	1.73	0.510352
MAGI1	16	30	1.81436	0.988	3.333	0.0549064	4	1.89784	0.618	5.827	0.262922	11	1.59067	0.72	3.51	0.250553
MAK	10	6	0.575174	0.209	1.585	0.28493	1	0.739461	0.092	5.933	0.776339	3	0.674979	0.18	2.52	0.559178
MAP1S	3	2	0.605796	0.101	3.628	0.583147	0	0	0	Inf	0.994425	2	1.19108	0.2	7.14	0.848217
MAPT	29	24	0.801755	0.466	1.38	0.425057	3	0.750778	0.225	2.503	0.640794	12	0.876912	0.44	1.74	0.708012
MARCO	21	22	0.980532	0.538	1.786	0.948772	6	1.68096	0.671	4.21	0.267532	10	0.894744	0.42	1.91	0.773679
MCM5	21	20	0.911823	0.493	1.685	0.768348	4	1.29827	0.44	3.834	0.636619	10	0.921969	0.43	1.97	0.833936
METTL2A	2	1	0.481983	0.044	5.33	0.551688	0	0	0	Inf	0.995448	1	0.890278	0.08	9.83	0.924423
MICAL1	34	43	1.20757	0.768	1.898	0.413544	9	1.82242	0.854	3.888	0.120628	18	1.18688	0.66	2.15	0.572019
MMP27	7	5	0.670497	0.213	2.115	0.4953	0	0	0	Inf	0.991545	4	1.3034	0.37	4.57	0.678622
MST1L	24	21	0.875817	0.486	1.577	0.658493	3	1.0594	0.309	3.627	0.926781	7	0.705969	0.3	1.69	0.43374
MYH7B	118	141	1.1529	0.9	1.477	0.259787	14	0.80029	0.455	1.407	0.43887	67	1.17336	0.86	1.6	0.309239
NADSYN1	41	46	1.08658	0.712	1.659	0.700556	4	0.641187	0.227	1.813	0.402004	20	1.00815	0.58	1.74	0.976851
NEK1	35	22	0.610231	0.357	1.042	0.0704541	3	0.586089	0.179	1.922	0.377958	11	0.621299	0.31	1.23	0.171994
NIPBL	58	41	0.663781	0.444	0.992	0.0457095	6	0.683432	0.292	1.6	0.380475	17	0.586852	0.34	1.02	0.0567762
NLRP12	30	26	0.854821	0.505	1.448	0.55974	7	1.97034	0.844	4.598	0.11671	5	0.384381	0.15	1.01	0.0512265
NR3C2	0	4	0	0	inf	0.906081	1	0	0	Inf	0.996068	1	0	0	Inf	0.994285
NUDT1	4	7	1.75575	0.513	6.011	0.369991	2	3.72613	0.657	21.117	0.137232	2	0.918425	0.17	5.02	0.921783
OPRM1	17	17	0.992793	0.506	1.949	0.983233	1	0.407933	0.054	3.096	0.385882	8	0.935518	0.4	2.19	0.877637
OR4F17	0	0	-	-	-	-	0	-	-	-	-	0	-	-	-	-
OTOP1	13	16	1.18297	0.568	2.464	0.653501	3	1.77915	0.495	6.388	0.377059	5	0.910221	0.32	2.61	0.86081
PAK6	9	14	1.51789	0.656	3.513	0.329696	2	1.37286	0.291	6.471	0.688701	7	1.56545	0.58	4.26	0.379633
PBXIP1	4	7	1.75027	0.511	5.993	0.37272	1	2.674	0.269	26.544	0.400958	2	1.22216	0.2	7.32	0.826171
PCBP4	4	3	0.778708	0.174	3.488	0.743715	0	0	0	Inf	0.993717	2	1.21616	0.22	6.88	0.824831
PCK2	119	144	1.17718	0.921	1.505	0.193333	18	1.15016	0.691	1.915	0.590619	68	1.24971	0.92	1.7	0.158418
PDCD11	22	19	0.845821	0.457	1.566	0.594059	1	0.368372	0.049	2.775	0.33236	9	0.87515	0.4	1.94	0.741854
PDS5B	16	11	0.666451	0.309	1.438	0.301263	1	0.434638	0.057	3.323	0.422031	2	0.27236	0.06	1.2	0.0855597
PHF2	8	7	0.855157	0.309	2.363	0.762859	3	3.40653	0.853	13.597	0.0826341	3	0.913822	0.23	3.6	0.897398
PHRF1	8	9	1.05351	0.406	2.735	0.914705	2	1.74497	0.36	8.452	0.489163	5	1.2672	0.41	3.93	0.681862
PIK3CG	13	23	1.71166	0.866	3.385	0.122315	2	1.01881	0.227	4.576	0.980607	11	1.59666	0.71	3.58	0.256188
PINX1	16	16	0.95952	0.479	1.922	0.907189	1	0.472034	0.062	3.607	0.469362	7	1.01405	0.41	2.51	0.975909
PLD2	39	38	0.942056	0.601	1.476	0.794324	6	1.13897	0.475	2.731	0.770584	18	1.03889	0.59	1.84	0.89611
POLR3A	91	91	0.972373	0.725	1.304	0.851487	9	0.72616	0.361	1.459	0.368914	37	0.894173	0.6	1.33	0.57919
PRKCG	4	3	0.803552	0.179	3.598	0.774917	0	0	0	Inf	0.993787	0	0	0	Inf	0.988826
PRMT9	15	17	1.08152	0.539	2.169	0.825332	1	0.422165	0.055	3.23	0.406185	8	1.08376	0.45	2.6	0.856768
PRRC2C	8	14	1.66145	0.696	3.967	0.252945	2	1.7272	0.347	8.589	0.504267	7	2.08668	0.7	6.22	0.186753
PTCH1	50	54	1.05651	0.718	1.556	0.780621	5	0.786259	0.309	2	0.613723	31	1.43511	0.9	2.29	0.128499
PTK2B	20	25	1.18365	0.656	2.135	0.575241	3	1.1843	0.342	4.106	0.789716	9	1.20227	0.53	2.74	0.661396
PTPRN	12	13	1.04517	0.476	2.295	0.912325	0	0	0	Inf	0.988868	7	1.14834	0.45	2.94	0.773243
PYROXD1	13	14	1.0939	0.513	2.332	0.816271	1	0.994023	0.123	8.039	0.995515	6	1.52741	0.53	4.39	0.431388
RAD1	14	17	1.17245	0.577	2.384	0.660333	2	1.30363	0.28	6.072	0.735541	8	1.73371	0.67	4.48	0.255882
RASA2	10	12	1.16329	0.502	2.697	0.724462	1	0.744048	0.093	5.929	0.780092	6	1.28166	0.46	3.58	0.635931
RASEF	19	15	0.763599	0.387	1.505	0.436138	1	0.366689	0.049	2.772	0.331012	8	0.960128	0.41	2.24	0.924926
RGS22	17	8	0.434932	0.187	1.009	0.0525243	0	0	0	Inf	0.986609	3	0.329126	0.1	1.13	0.0776349
RIC1	37	47	1.23587	0.802	1.905	0.337594	6	1.14451	0.475	2.76	0.763802	18	1.07496	0.6	1.92	0.807182
RNF181	8	8	0.955102	0.358	2.55	0.926943	0	0	0	Inf	0.990851	3	0.831507	0.21	3.25	0.790605
SCN7A	51	45	0.860447	0.575	1.288	0.464835	9	1.48231	0.713	3.082	0.291943	21	1.00477	0.59	1.71	0.98597
SEC23B	48	53	1.08197	0.731	1.602	0.694182	6	0.973972	0.409	2.317	0.952441	28	1.34793	0.83	2.19	0.229373
SERPINB10	5	8	1.49138	0.487	4.564	0.483693	0	0	0	Inf	0.99286	5	2.17689	0.62	7.71	0.227737
SERPINF1	21	18	0.831641	0.442	1.564	0.567111	1	0.392408	0.052	2.969	0.364975	9	1.01981	0.45	2.29	0.962138
SGSM3	26	13	0.474164	0.243	0.924	0.0283512	2	0.512986	0.12	2.185	0.366603	5	0.40407	0.15	1.06	0.0662546
SH2D6	3	4	1.23075	0.275	5.51	0.786026	1	1.99194	0.202	19.618	0.554866	1	0.59017	0.06	5.68	0.648001
SIRT3	25	14	0.534786	0.278	1.03	0.0614248	2	0.628523	0.146	2.705	0.532867	8	0.739525	0.33	1.68	0.469758
SLC10A6	4	6	1.44113	0.406	5.117	0.571895	0	0	0	Inf	0.993724	4	2.56499	0.62	10.7	0.196173
SLC22A13	22	20	0.927285	0.505	1.703	0.807647	2	0.938961	0.215	4.094	0.933196	8	0.890987	0.39	2.06	0.786857
SLC22A5	33	49	1.46982	0.943	2.29	0.0887483	4	0.968054	0.337	2.784	0.951966	19	1.3132	0.73	2.36	0.360449
SLC2A8	49	53	1.03243	0.699	1.526	0.87274	6	0.834341	0.353	1.972	0.679808	24	1.07862	0.65	1.78	0.767487
SLC4A7	25	28	1.10243	0.642	1.894	0.724077	3	0.756262	0.226	2.526	0.649765	15	1.13657	0.6	2.17	0.697056
SLC4A8	15	14	0.862368	0.416	1.789	0.690882	2	0.856818	0.193	3.801	0.838914	7	1.00319	0.4	2.5	0.994535
SLC4A9	51	57	1.04402	0.714	1.527	0.824223	9	1.16336	0.565	2.395	0.681366	26	1.04258	0.64	1.69	0.866007
SLX4	12	10	0.789872	0.341	1.832	0.582531	1	0.518026	0.067	4.029	0.529721	5	0.808367	0.28	2.32	0.691907
SMARCAL1	68	82	1.16839	0.845	1.616	0.346563	11	1.07053	0.56	2.046	0.836558	43	1.22892	0.83	1.81	0.298444
SPATA21	6	5	0.828732	0.252	2.721	0.756809	2	2.44708	0.481	12.438	0.280678	0	0	0	Inf	0.986889
SUPT3H	10	11	1.0679	0.453	2.52	0.880786	2	1.14489	0.248	5.275	0.862191	4	0.712505	0.22	2.28	0.567084
SUPT6H	32	23	0.706365	0.413	1.209	0.205128	0	0	0	Inf	0.981847	13	0.91168	0.47	1.76	0.783619
TAB1	7	12	1.70432	0.67	4.337	0.263188	0	0	0	Inf	0.991418	7	2.275	0.76	6.84	0.143209
TARDBP	1	2	1.78227	0.162	19.646	0.636973	1	4.99817	0.312	80.03	0.25547	1	1.74362	0.11	27.9	0.694299
TCF7	16	14	0.825348	0.402	1.694	0.600915	2	0.806623	0.183	3.56	0.776626	6	0.719643	0.28	1.86	0.496467
TCF7L2	14	23	1.60648	0.825	3.127	0.163065	2	1.22206	0.268	5.572	0.795597	11	1.94558	0.85	4.47	0.117194
TIAM2	28	38	1.29695	0.795	2.117	0.29833	4	0.840041	0.292	2.416	0.746411	18	1.21732	0.67	2.21	0.518714
TNC	39	33	0.816775	0.513	1.301	0.394205	4	0.774378	0.272	2.201	0.631438	16	0.888909	0.49	1.62	0.699128
TNK1	24	20	0.846252	0.466	1.536	0.582993	2	0.883336	0.201	3.876	0.869421	5	0.575558	0.21	1.57	0.280236
TP53TG5	4	7	1.66262	0.486	5.687	0.41781	1	1.56721	0.171	14.348	0.69086	3	1.7611	0.38	8.14	0.468771
TRIM42	11	6	0.519128	0.192	1.406	0.197135	1	0.660094	0.084	5.2	0.693267	3	0.54084	0.15	1.96	0.348822
TRIM63	21	21	0.959187	0.523	1.759	0.892913	2	0.598266	0.139	2.579	0.490708	10	0.942555	0.44	2.02	0.879414
TRIO	56	61	1.03859	0.721	1.496	0.838881	10	1.17956	0.595	2.339	0.636267	35	1.25537	0.82	1.93	0.300127
TRPM1	48	52	1.09161	0.736	1.62	0.663484	7	1.45305	0.639	3.303	0.372474	21	1.11112	0.65	1.91	0.702197
TRPM4	102	87	0.816688	0.612	1.09	0.169177	13	0.895601	0.497	1.614	0.713585	33	0.666283	0.45	1	0.0472729
TSEN2	6	8	1.39857	0.484	4.043	0.535653	0	0	0	Inf	0.992177	5	1.5242	0.46	5.01	0.48718
TTC6	91	105	1.13503	0.855	1.507	0.381067	11	0.966777	0.51	1.831	0.917424	57	1.35521	0.96	1.91	0.0816066
TXLNA	8	3	0.371293	0.098	1.401	0.143704	0	0	0	Inf	0.990603	1	0.295513	0.04	2.46	0.259226
UBE2U	13	9	0.63517	0.271	1.488	0.295948	0	0	0	Inf	0.988387	3	0.467749	0.13	1.66	0.239495
USP5	10	13	1.27943	0.56	2.924	0.559043	0	0	0	Inf	0.989603	8	1.89005	0.7	5.07	0.206458
UVSSA	23	10	0.42105	0.2	0.886	0.0226065	4	1.3197	0.445	3.914	0.61702	2	0.190142	0.04	0.82	0.0255356
WRNIP1	20	27	1.27632	0.715	2.279	0.409587	2	0.659879	0.153	2.853	0.577908	15	1.56785	0.79	3.1	0.195622
XDH	64	68	1.04146	0.738	1.469	0.816848	7	0.867827	0.391	1.924	0.727064	36	1.28937	0.84	1.97	0.242049
ZBTB39	5	7	1.38622	0.439	4.376	0.577664	0	0	0	Inf	0.993129	5	3.00302	0.84	10.78	0.0918291
ZWINT	3	7	2.28067	0.589	8.83	0.232603	1	2.44214	0.244	24.435	0.447351	2	1.22216	0.2	7.32	0.826171
