# Supplementary material for: Uncovering the Contribution of Moderate-Penetrance Susceptibility Genes to Breast Cancer by Whole-Exome Sequencing and Targeted Enrichment Sequencing of Candidate Genes in Women of European Ancestry
Source: Cancers (Basel). 2022 Jul 11;14(14):3363. doi: 10.3390/cancers14143363 (PMC9317824; doi:10.3390/cancers14143363)
Supplement: Supplementary file 1 [file cancers-14-03363-s001.zip › Table S9-final_16052022.xlsx]

## Sheet: Table S9
Associations with breast cancer risk of loss of function and rare missense variants in 178 genes idendified at the discovery stage, by study.
Gene	GC-HBOC (3070 cases, 2735 controls)												SEARCH (1159 cases, 1318 controls)												DFBBCS (990 cases, 940 controls)												OFBCR (580 cases, 572 controls)												CARTAGENE (406 cases, 450 controls)
	Loss of function variants carriers		OR	95 %CI		p-value	Rare missense variants carriers		OR	95 %CI		p-value	Loss of function variants carriers		OR	95 %CI		p-value	Rare missense variants carriers		OR	95 %CI		p-value	Loss of function variants carriers		OR	95 %CI		p-value	Rare missense variants carriers		OR	95 %CI		p-value	Loss of function variants carriers		OR	95 %CI		p-value	Rare missense variants carriers		OR	95 %CI		p-value	Loss of function variants carriers
	Cases	Controls					Cases	Controls					Cases	Controls					Cases	Controls					Cases	Controls					Cases	Controls					Cases	Controls					Cases	Controls					Cases
ABCC2	12	10	1.06934	0.4227	2.768	1	39	24	1.45334	0.8498	2.5336	0.163722	11	2	6.3	1.371	58.5293	0.00924485	14	10	1.59898	0.6577	4.0403	0.30581	1	3	0.315969	0.006	3.9428	0.36215	14	8	1.67066	0.65	4.62	0.287109	0	0	-	-	-	-	7	11	0.623293	0.2033	1.7753	0.35245	2
ABCG2	9	2	4.01686	0.8304	38.2519	0.0700177	5	13	0.341633	0.0952	1.0228	0.0353552	3	3	1.14	0.152	8.511	1	2	2	1.13736	0.0823	15.7096	1	4	2	1.90202	0.2719	21.0726	0.687644	4	0	Inf	0.63	Inf	0.125115	2	1	1.97465	0.1025	116.689	1	2	2	0.98617	0.0713	13.6438	1	0
ADAM29	0	0	-	-	-	-	3	0	Inf	0.3682	Inf	0.252369	0	0	-	-	-	-	0	0	-	-	-	-	0	0	-	-	-	-	2	0	Inf	0.18	Inf	0.500077	0	0	-	-	-	-	0	0	-	-	-	-	0
ADAMTS12	3	5	0.534135	0.0829	2.7482	0.487602	43	28	1.37329	0.8312	2.3023	0.231481	4	2	2.28	0.3258	25.2266	0.427563	16	15	1.21588	0.5602	2.6533	0.593051	0	0	-	-	-	-	3	9	0.314585	0.05	1.27	0.08421	1	0	Inf	0.0253	Inf	1	6	4	1.48381	0.3498	7.1881	0.752892	0
ADRA1A	6	8	0.667562	0.1907	2.197	0.593919	11	6	1.63542	0.5535	5.3931	0.466641	1	2	0.57	0.0096	10.9311	1	0	2	0	0	6.0546	0.501859	0	0	-	-	-	-	3	1	2.85246	0.23	149.88	0.625115	0	1	0	0	38.4626	0.497	1	2	0.492523	0.0083	9.4857	0.622081	1
ADSSL1/ADSS1	1	3	0.296788	0.0057	3.6991	0.348595	23	11	1.86906	0.8734	4.2552	0.0877508	2	3	0.76	0.0632	6.6273	1	7	7	1.13796	0.3395	3.8144	1	1	0	Inf	0.0243	Inf	1	1	3	0.315969	0.01	3.94	0.36215	1	0	Inf	0.0253	Inf	1	3	1	2.96645	0.2374	155.998	0.624384	0
AMFR	1	0	Inf	0.0229	Inf	1	4	3	1.18805	0.2008	8.1194	1	1	0	Inf	0.0292	Inf	0.467905	1	1	1.13725	0.0145	89.2826	1	0	1	0	0	37.0308	0.487047	1	1	0.949449	0.01	74.57	1	0	0	-	-	-	-	0	0	-	-	-	-	0
ANKK1	4	5	0.712375	0.1412	3.3134	0.742962	1	0	Inf	0.0229	Inf	1	7	4	2	0.5058	9.3205	0.365957	0	0	-	-	-	-	4	0	Inf	0.6275	Inf	0.125115	0	0	-	-	-	-	0	2	0	0	5.2496	0.246	0	0	-	-	-	-	0
ANKRD53	3	1	2.67373	0.2146	140.344	0.627366	1	1	0.890862	0.0114	69.9182	1	0	0	-	-	-	-	0	1	0	0	44.3203	1	0	0	-	-	-	-	1	0	Inf	0.02	Inf	1	0	0	-	-	-	-	0	1	0	0	38.4626	0.496528	0
ARHGEF10L	2	2	0.890827	0.0645	12.2939	1	10	3	2.97535	0.7651	16.8416	0.0989042	0	1	0	0	44.3203	1	2	3	0.757792	0.0632	6.6273	1	0	0	-	-	-	-	1	0	Inf	0.02	Inf	1	0	0	-	-	-	-	2	2	0.98617	0.0713	13.6438	1	1
ARL14EP	0	0	-	-	-	-	0	0	-	-	-	-	0	0	-	-	-	-	1	0	Inf	0.0292	Inf	0.467905	0	0	-	-	-	-	1	0	Inf	0.02	Inf	1	0	0	-	-	-	-	0	0	-	-	-	-	0
ASIP	0	0	-	-	-	-	0	1	0	0	34.7447	0.471146	0	0	-	-	-	-	0	0	-	-	-	-	0	0	-	-	-	-	0	0	-	-	-	-	0	0	-	-	-	-	1	0	Inf	0.0253	Inf	1	0
ATP2A1	11	7	1.40131	0.4952	4.2696	0.637657	26	23	1.00714	0.551	1.8524	1	1	1	1.14	0.0145	89.2826	1	9	17	0.599048	0.2343	1.4274	0.239831	2	4	0.473864	0.0428	3.3155	0.44114	10	5	1.90754	0.59	7.14	0.302325	0	1	0	0	38.4626	0.497	4	3	1.31681	0.2217	9.0277	1	2
ATP2C1	1	1	0.890862	0.0114	69.9182	1	12	8	1.33757	0.5019	3.7779	0.655119	0	0	-	-	-	-	2	4	0.567974	0.0513	3.9715	0.690979	0	0	-	-	-	-	4	4	0.949296	0.18	5.11	1	0	0	-	-	-	-	2	4	0.491644	0.0443	3.4459	0.44889	0
ATR	19	11	1.54203	0.6959	3.5936	0.275743	11	14	0.698946	0.2866	1.6604	0.424948	1	2	0.57	0.0096	10.9311	1	6	9	0.756951	0.221	2.3896	0.79635	1	2	0.474396	0.008	9.1272	0.615334	6	8	0.710495	0.2	2.35	0.598061	0	0	-	-	-	-	3	2	1.4813	0.169	17.7904	1	0
ATRIP	5	5	0.89072	0.2048	3.875	1	8	7	1.01819	0.3222	3.303	1	3	0	Inf	0.4702	Inf	0.102299	3	2	1.70723	0.1952	20.4684	0.669879	0	0	-	-	-	-	0	1	0	0	37.03	0.487047	2	0	Inf	0.1853	Inf	0.5	0	1	0	0	38.4626	0.496528	0
AUNIP	7	7	0.890649	0.2662	2.9798	1	1	1	0.890862	0.0114	69.9182	1	3	0	Inf	0.4702	Inf	0.102299	0	0	-	-	-	-	0	2	0	0	5.0547	0.237085	1	0	Inf	0.02	Inf	1	0	1	0	0	38.4626	0.497	0	0	-	-	-	-	0
BAZ1B	0	0	-	-	-	-	0	5	0	0	0.9715	0.0231705	0	0	-	-	-	-	2	1	2.27585	0.1183	134.307	0.602393	0	1	0	0	37.0308	0.487047	3	0	Inf	0.39	Inf	0.250115	0	0	-	-	-	-	2	0	Inf	0.1853	Inf	0.49959	0
BLM	19	6	2.83184	1.0854	8.6766	0.025689	3	0	Inf	0.3682	Inf	0.252369	1	4	0.28	0.0058	2.8731	0.379643	0	1	0	0	44.3203	1	1	2	0.474396	0.008	9.1272	0.615334	0	0	-	-	-	-	0	2	0	0	5.2496	0.246	0	0	-	-	-	-	0
BLOC1S2	0	4		0	1.3489	0.0492171	0	1	0	0	34.7447	0.471146	2	1	2.28	0.1183	134.307	0.602393	0	0	-	-	-	-	0	0	-	-	-	-	0	0	-	-	-	-	0	0	-	-	-	-	0	0	-	-	-	-	0
BPTF	0	0	-	-	-	-	7	7	0.890649	0.2662	2.9798	1	1	1	1.14	0.0145	89.2826	1	4	4	1.1376	0.2114	6.1218	1	2	0	Inf	0.1783	Inf	0.500077	2	1	1.90019	0.1	112.19	1	2	3	0.656527	0.0547	5.7534	0.685	4	1	3.9609	0.3904	195.431	0.373973	0
C2CD4A	0	0	-	-	-	-	0	0	-	-	-	-	0	0	-	-	-	-	0	0	-	-	-	-	0	0	-	-	-	-	0	0	-	-	-	-	0	0	-	-	-	-	0	0	-	-	-	-	0
C4orf48	1	1	0.890862	0.0114	69.9182	1	0	0	-	-	-	-	0	0	-	-	-	-	0	0	-	-	-	-	0	0	-	-	-	-	1	0	Inf	0.02	Inf	1	0	0	-	-	-	-	0	0	-	-	-	-	0
C6orf211/ARMT1	4	2	1.7826	0.2552	19.7131	0.690454	1	1	0.890862	0.0114	69.9182	1	0	2	0	0	6.0546	0.501859	2	2	1.13736	0.0823	15.7096	1	0	1	0	0	37.0308	0.487047	1	0	Inf	0.02	Inf	1	0	1	0	0	38.4626	0.497	0	0	-	-	-	-	0
C6orf57/SDHAF4	0	1	0	0	34.7447	0.471146	3	6	0.444955	0.0719	2.0858	0.321763	0	1	0	0	44.3203	1	0	1	0	0	44.3203	1	0	0	-	-	-	-	0	7	0	0	0.66	0.00642687	0	0	-	-	-	-	2	1	1.97465	0.1025	116.689	1	0
CCDC11/CFAP53	0	0	-	-	-	-	2	0	Inf	0.1673	Inf	0.501579	0	0	-	-	-	-	0	0	-	-	-	-	2	0	Inf	0.1783	Inf	0.500077	0	0	-	-	-	-	0	2	0	0	5.2496	0.246	0	0	-	-	-	-	0
CCDC66	47	55	0.757626	0.5003	1.1433	0.193092	4	3	1.18805	0.2008	8.1194	1	21	32	0.74	0.404	1.3352	0.331028	1	2	0.568347	0.0096	10.9311	1	17	26	0.614357	0.3106	1.1851	0.125408	0	2	0	0	5.05	0.237085	14	7	1.9953	0.7469	5.8862	0.185	0	0	-	-	-	-	9
CCDC7	3	3	0.890791	0.1192	6.6567	1	1	2	0.445317	0.0076	8.559	0.604605	0	0	-	-	-	-	0	0	-	-	-	-	0	1		0	37.0308	0.487047	0	0	-	-	-	-	0	0	-	-	-	-	0	0	-	-	-	-	0
CDK11A	8	14	0.507854	0.1843	1.2995	0.136986	0	0	-	-	-	-	8	4	2.28	0.6096	10.3863	0.245948	0	0	-	-	-	-	3	1	2.85246	0.2286	149.876	0.625115	0	0	-	-	-	-	1	3	0.327849	0.0062	4.0968	0.371	0	0	-	-	-	-	2
CDS1	1	3	0.296788	0.0057	3.6991	0.348595	1	0	Inf	0.0229	Inf	1	0	0	-	-	-	-	0	0	-	-	-	-	0	0	-	-	-	-	1	0	Inf	0.02	Inf	1	0	0	-	-	-	-	0	1	0	0	38.4626	0.496528	0
CEACAM1	2	1	1.78209	0.0927	105.125	1	2	1	1.78209	0.0927	105.125	1	1	0	Inf	0.0292	Inf	0.467905	0	0	-	-	-	-	0	0	-	-	-	-	0	0	-	-	-	-	0	0	-	-	-	-	0	0	-	-	-	-	0
CEP104	8	5	1.42643	0.4109	5.5482	0.588946	9	3	2.67701	0.6672	15.3899	0.153621	4	0	Inf	0.7515	Inf	0.0478004	4	2	2.27806	0.3258	25.2266	0.427563	1	0	Inf	0.0243	Inf	1	1	3	0.315969	0.01	3.94	0.36215	1	1	0.986193	0.0125	77.502	1	1	4	0.24553	0.005	2.4908	0.21472	2
CEP55	3	5	0.534135	0.0829	2.7482	0.487602	1	1	0.890862	0.0114	69.9182	1	2	3	0.76	0.0632	6.6273	1	1	2	0.568347	0.0096	10.9311	1	1	2	0.474396	0.008	9.1272	0.615334	0	0	-	-	-	-	1	0	Inf	0.0253	Inf	1	0	1	0	0	38.4626	0.496528	1
CIDEB	5	11	0.404034	0.1099	1.2633	0.129951	2	1	1.78209	0.0927	105.125	1	1	1	1.14	0.0145	89.2826	1	0	0	-	-	-	-	5	1	4.76316	0.5316	225.444	0.218966	1	0	Inf	0.02	Inf	1	2	3	0.656527	0.0547	5.7534	0.685	1	0	Inf	0.0253	Inf	1	1
CLCN2	3	2	1.33658	0.153	16.0067	1	29	43	0.597078	0.3584	0.9817	0.032737	2	2	1.14	0.0823	15.7096	1	18	15	1.37019	0.6488	2.9353	0.385259	0	4	0	0	1.4365	0.0560864	11	10	1.04493	0.4	2.76	1	0	2	0	0	5.2496	0.246	3	7	0.419941	0.0697	1.8508	0.221556	0
CLEC10A	5	9	0.494172	0.1299	1.6444	0.283862	0	0	-	-	-	-	0	0	-	-	-	-	1	0	Inf	0.0292	Inf	0.467905	0	1	0	0	37.0308	0.487047	0	0	-	-	-	-	1	1	0.986193	0.0125	77.502	1	0	0	-	-	-	-	1
CLINT1	0	0	-	-	-	-	1	2	0.445317	0.0076	8.559	0.604605	0	0	-	-	-	-	0	0	-	-	-	-	0	0	-	-	-	-	1	0	Inf	0.02	Inf	1	0	0	-	-	-	-	1	1	0.986193	0.0125	77.502	1	0
CLUH	1	1	0.890862	0.0114	69.9182	1	13	23	0.501493	0.2328	1.0347	0.0456575	0	0	-	-	-	-	7	7	1.13796	0.3395	3.8144	1	0	1	0	0	37.0308	0.487047	4	9	0.419832	0.09	1.51	0.168642	0	0	-	-	-	-	2	4	0.491644	0.0443	3.4459	0.44889	0
COL5A2	2	0	Inf	0.1673	Inf	0.501579	17	15	1.00972	0.4733	2.1759	1	0	0	-	-	-	-	8	13	0.697822	0.2498	1.8239	0.512666	0	0	-	-	-	-	2	2	0.949398	0.07	13.12	1	0	0	-	-	-	-	4	7	0.560795	0.1197	2.2201	0.382316	0
CTBP1	4	1	3.56604	0.3526	175.577	0.378943	0	2	0	0	4.7432	0.221935	0	0	-	-	-	-	0	2	0	0	6.0546	0.501859	0	0	-	-	-	-	0	1	0	0	37.03	0.487047	0	0	-	-	-	-	0	1	0	0	38.4626	0.496528	0
DARS2	6	2	2.67537	0.4779	27.1361	0.295268	9	13	0.615693	0.2319	1.5597	0.289772	0	0	-	-	-	-	0	0	-	-	-	-	1	3	0.315969	0.006	3.9428	0.36215	1	4	0.236778	0	2.4	0.206743	1	0	Inf	0.0253	Inf	1	1	2	0.492523	0.0083	9.4857	0.622081	0
DGAT2	3	4	0.667887	0.0977	3.952	0.7135	5	2	2.22883	0.3646	23.4242	0.458294	3	2	1.71	0.1952	20.4684	0.669879	1	0	Inf	0.0292	Inf	0.467905	0	6	0	0	0.804	0.0132391	0	0	-	-	-	-	0	0	-	-	-	-	0	0	-	-	-	-	1
DHFRL1/DHFR2	0	0	-	-	-	-	0	0	-	-	-	-	0	0	-	-	-	-	0	0	-	-	-	-	0	0	-	-	-	-	0	0	-	-	-	-	0	0	-	-	-	-	0	0	-	-	-	-	0
DKKL1	0	0	-	-	-	-	0	0	-	-	-	-	0	1	0	0	44.3203	1	1	1	1.13725	0.0145	89.2826	1	0	0	-	-	-	-	1	0	Inf	0.02	Inf	1	0	0	-	-	-	-	0	0	-	-	-	-	0
DLX6	0	0	-	-	-	-	1	2	0.445317	0.0076	8.559	0.604605	0	0	-	-	-	-	1	2	0.568347	0.0096	10.9311	1	0	0	-	-	-	-	0	1	0	0	37.03	0.487047	0	0	-	-	-	-	0	0	-	-	-	-	0
DNAH11	15	7	1.91328	0.733	5.556	0.19908	61	63	0.859836	0.5922	1.2477	0.414484	6	12	0.57	0.1739	1.6372	0.343921	25	21	1.36141	0.7271	2.5728	0.371056	2	6	0.315278	0.0311	1.7688	0.168578	17	10	1.62446	0.7	3.99	0.248788	3	2	1.4813	0.169	17.7904	1	5	14	0.346874	0.0971	1.0277	0.038552	1
DNAH8	18	26	0.61456	0.3166	1.1677	0.129512	42	34	1.10185	0.6822	1.7915	0.72919	5	5	1.14	0.2611	4.9569	1	13	10	1.48352	0.5983	3.7954	0.403942	3	5	0.568557	0.088	2.9315	0.496684	15	15	0.948723	0.43	2.1	1	1	5	0.196094	0.0041	1.7601	0.122	11	7	1.55978	0.5476	4.782	0.477368	7
DNAJC11	0	0	-	-	-	-	3	4	0.667887	0.0977	3.952	0.7135	0	0	-	-	-	-	0	1	0	0	44.3203	1	0	0	-	-	-	-	0	0	-	-	-	-	0	0	-	-	-	-	0	0	-	-	-	-	0
DUOX2	31	48	0.571089	0.3503	0.9188	0.0168089	54	50	0.961464	0.6398	1.4473	0.843654	4	21	0.21	0.0533	0.6368	0.00194113	14	17	0.935736	0.425	2.0271	1	16	17	0.891949	0.419	1.8899	0.860944	15	12	1.18964	0.52	2.8	0.701723	4	3	1.31681	0.2217	9.0277	1	12	13	0.908532	0.3753	2.1805	0.842362	4
DYNC2H1	19	12	1.41303	0.6498	3.1983	0.37269	83	80	0.922204	0.667	1.2757	0.633454	4	2	2.28	0.3258	25.2266	0.427563	16	31	0.581278	0.2953	1.1024	0.103543	0	1	0	0	37.0308	0.487047	17	19	0.846994	0.41	1.73	0.736949	1	1	0.986193	0.0125	77.502	1	9	12	0.73575	0.2715	1.9196	0.516998	1
E4F1	1	1	0.890862	0.0114	69.9182	1	4	0	Inf	0.5883	Inf	0.12737	0	1	0	0	44.3203	1	0	0	-	-	-	-	0	0	-	-	-	-	0	0	-	-	-	-	0	0	-	-	-	-	0	1	0	0	38.4626	0.496528	0
EAF2	1	3	0.296788	0.0057	3.6991	0.348595	0	0	-	-	-	-	0	0	-	-	-	-	2	0	Inf	0.2136	Inf	0.218834	0	0	-	-	-	-	0	1	0	0	37.03	0.487047	0	0	-	-	-	-	0	0	-	-	-	-	0
EEFSEC	0	1	0	0	34.7447	0.471146	10	11	0.809301	0.3076	2.1027	0.666443	1	2	0.57	0.0096	10.9311	1	1	1	1.13725	0.0145	89.2826	1	2	1	1.90019	0.0988	112.189	1	2	2	0.949398	0.07	13.12	1	1	0	Inf	0.0253	Inf	1	3	1	2.96645	0.2374	155.998	0.624384	0
EFCAB5	18	8	2.01012	0.8301	5.351	0.115379	3	2	1.33658	0.153	16.0067	1	3	12	0.28	0.051	1.0506	0.0401327	2	1	2.27585	0.1183	134.307	0.602393	2	9	0.209561	0.022	1.0162	0.03386	0	2	0	0	5.05	0.237085	3	1	2.96645	0.2374	155.998	0.624	2	1	1.97465	0.1025	116.689	1	1
EGFR	0	0	-	-	-	-	8	18	0.394428	0.1481	0.9552	0.0292535	1	0	Inf	0.0292	Inf	0.467905	7	1	7.99713	1.025	360.337	0.0293892	0	0	-	-	-	-	2	2	0.949398	0.07	13.12	1	0	0	-	-	-	-	1	3	0.327849	0.0062	4.0968	0.370903	0
EHHADH	0	1	0	0	34.7447	0.471146	10	8	1.11393	0.3952	3.253	1	1	0	Inf	0.0292	Inf	0.467905	3	4	0.852564	0.1246	5.051	1	0	0	-	-	-	-	4	1	3.80683	0.38	187.63	0.375192	0	0	-	-	-	-	1	3	0.327849	0.0062	4.0968	0.370903	0
EML5	5	15	0.29587	0.084	0.8578	0.0135121	15	10	1.3379	0.5612	3.3364	0.549808	0	2	0	0	6.0546	0.501859	7	3	2.66248	0.6061	15.993	0.204479	1	1	0.949449	0.0121	74.5661	1	6	7	0.812807	0.22	2.84	0.785267	2	0	Inf	0.1853	Inf	0.5	3	4	0.738498	0.1077	4.3863	0.723974	0
ENO3	3	3	0.890791	0.1192	6.6567	1	14	6	2.08335	0.7509	6.6247	0.17717	2	3	0.76	0.0632	6.6273	1	5	7	0.811532	0.2025	2.9795	0.779421	0	2	0	0	5.0547	0.237085	4	6	0.631661	0.13	2.67	0.53845	2	0	Inf	0.1853	Inf	0.5	1	2	0.492523	0.0083	9.4857	0.622081	5
EPHA10	3	7	0.381261	0.0636	1.6721	0.206314	8	10	0.712	0.2438	2.0068	0.489108	1	1	1.14	0.0145	89.2826	1	3	2	1.70723	0.1952	20.4684	0.669879	2	0	Inf	0.1783	Inf	0.500077	2	4	0.473864	0.04	3.32	0.44114	3	2	1.4813	0.169	17.7904	1	0	2	0	0	5.2496	0.246323	1
EPN3	12	7	1.52918	0.5541	4.5913	0.491213	10	6	1.48628	0.4887	4.9826	0.465997	6	2	3.42	0.6105	34.7429	0.157375	3	5	0.681593	0.1056	3.512	0.730617	2	9	0.209561	0.022	1.0162	0.03386	3	5	0.568557	0.09	2.93	0.496684	2	3	0.656527	0.0547	5.7534	0.685	2	0	Inf	0.1853	Inf	0.49959	2
EPS8L2	5	1	4.45898	0.4985	210.821	0.223188	18	13	1.23486	0.5708	2.7468	0.593327	2	1	2.28	0.1183	134.307	0.602393	4	8	0.567226	0.1247	2.1239	0.39844	0	0	-	-	-	-	3	3	0.949347	0.13	7.11	1	0	1	0	0	38.4626	0.497	3	1	2.96645	0.2374	155.998	0.624384	0
ERCC2	6	5	1.0692	0.2715	4.4339	1	40	20	1.7919	1.0202	3.244	0.0369743	3	4	0.85	0.1246	5.051	1	14	10	1.59898	0.6577	4.0403	0.30581	0	0	-	-	-	-	12	8	1.42918	0.53	4.05	0.504121	3	2	1.4813	0.169	17.7904	1	5	5	0.986097	0.2256	4.3097	1	0
ERCC4	4	2	1.7826	0.2552	19.7131	0.690454	8	12	0.592918	0.2099	1.5801	0.26934	0	2	0	0	6.0546	0.501859	5	7	0.811532	0.2025	2.9795	0.779421	0	0	-	-	-	-	2	4	0.473864	0.04	3.32	0.44114	0	0	-	-	-	-	2	1	1.97465	0.1025	116.689	1	0
ERCC6	6	6	0.890684	0.2378	3.3361	1	8	13	0.547115	0.1963	1.4266	0.193844	3	2	1.71	0.1952	20.4684	0.669879	6	4	1.70907	0.4041	8.2552	0.529647	2	0	Inf	0.1783	Inf	0.500077	3	4	0.711375	0.1	4.22	0.719586	0	1	0	0	38.4626	0.497	1	1	0.986193	0.0125	77.502	1	0
FAM83B	0	1	0	0	34.7447	0.471146	3	7	0.381261	0.0636	1.6721	0.206314	0	0	-	-	-	-	2	3	0.757792	0.0632	6.6273	1	0	0	-	-	-	-	1	0	Inf	0.02	Inf	1	0	0	-	-	-	-	1	1	0.986193	0.0125	77.502	1	0
FANCA	4	5	0.712375	0.1412	3.3134	0.742962	92	90	0.907933	0.6682	1.234	0.546498	1	4	0.28	0.0058	2.8731	0.379643	30	34	1.00349	0.589	1.7017	1	2	1	1.90019	0.0988	112.189	1	28	24	1.11081	0.62	2.02	0.779113	0	2	0	0	5.2496	0.246	14	13	1.06357	0.459	2.4817	1	0
FANCD2OS	0	1	0	0	34.7447	0.471146	13	11	1.05309	0.4345	2.6006	1	1	0	Inf	0.0292	Inf	0.467905	4	12	0.377065	0.0884	1.2485	0.129054	0	0	-	-	-	-	1	2	0.474396	0.01	9.13	0.615334	0	1	0	0	38.4626	0.497	0	2	0	0	5.2496	0.246323	1
FARP2	11	10	0.979895	0.3771	2.5781	1	21	23	0.812158	0.4265	1.5388	0.545552	5	2	2.85	0.4655	29.9829	0.263106	5	8	0.709587	0.1821	2.4679	0.590354	0	0	-	-	-	-	9	4	2.14588	0.6	9.57	0.267331	1	0	Inf	0.0253	Inf	1	3	4	0.738498	0.1077	4.3863	0.723974	3
FBXO11	0	1	-	-	-	-	6	7	0.763187	0.2116	2.6558	0.782588	0	0	-	-	-	-	2	1	2.27585	0.1183	134.307	0.602393	0	0	-	-	-	-	2	2	0.949398	0.07	13.12	1	0	0	-	-	-	-	0	1	0	0	38.4626	0.496528	0
FGFR3	0	1	-	-	-	-	15	18	0.741177	0.347	1.5607	0.484867	0	0	-	-	-	-	13	11	1.34768	0.5547	3.3365	0.53976	0	0	-	-	-	-	5	6	0.790285	0.19	3.12	0.768719	0	0	-	-	-	-	3	5	0.58987	0.0912	3.0478	0.503491	0
FHL3	0	1	-	-	-	-	21	14	1.33857	0.6477	2.8521	0.497549	1	0	Inf	0.0292	Inf	0.467905	4	8	0.567226	0.1247	2.1239	0.39844	0	0	-	-	-	-	6	3	1.90385	0.41	11.8	0.508116	0	0	-	-	-	-	6	10	0.587727	0.1744	1.7988	0.325844	1
FIGNL1	0	1	-	-	-	-	5	16	0.27727	0.0793	0.7935	0.00819722	0	0	-	-	-	-	7	7	1.13796	0.3395	3.8144	1	0	0	-	-	-	-	1	0	Inf	0.02	Inf	1	0	0	-	-	-	-	4	7	0.560795	0.1197	2.2201	0.382316	0
FOXM1	1	0	Inf	0.0229	Inf	1	3	4	0.667887	0.0977	3.952	0.7135	0	0	-	-	-	-	3	8	0.425109	0.0725	1.7765	0.236129	0	0	-	-	-	-	4	2	1.90202	0.27	21.07	0.687644	0	0	-	-	-	-	2	3	0.656527	0.0547	5.7534	0.684805	0
FRMPD1	2	1	1.78209	0.0927	105.125	1	1	5	0.177963	0.0038	1.5917	0.10632	0	1	0	0	44.3203	1	3	3	1.13748	0.152	8.511	1	0	0	-	-	-	-	1	4	0.236778	0	2.4	0.206743	0	1	0	0	38.4626	0.497	0	1	0	0	38.4626	0.496528	1
GINS4	0	1	0	0	34.7447	0.471146	2	5	0.355992	0.0339	2.1765	0.26545	0	0	-	-	-	-	5	3	1.89869	0.3685	12.2537	0.485656	1	0	Inf	0.0243	Inf	1	2	2	0.949398	0.07	13.12	1	0	0	-	-	-	-	0	0	-	-	-	-	0
GNE	0	2	0	0	4.7432	0.221935	17	13	1.16588	0.5322	2.6154	0.717285	0	0	-	-	-	-	12	10	1.36826	0.5395	3.5498	0.523349	1	1	0.949449	0.0121	74.5661	1	10	7	1.35984	0.47	4.23	0.629522	0	0	-	-	-	-	6	7	0.843829	0.2327	2.9525	0.788012	0
GOLGA8B	0	0	-	-	-	-	0	0	-	-	-	-	0	0	-	-	-	-	0	0	-	-	-	-	0	0	-	-	-	-	0	0	-	-	-	-	0	0	-	-	-	-	0	0	-	-	-	-	0
GRM3	0	0	-	-	-	-	7	10	0.622812	0.2009	1.8154	0.344118	0	1		0	44.3203	1	2	6	0.378141	0.0372	2.1199	0.29637	0	0	-	-	-	-	7	1	6.68155	0.86	301.27	0.0704795	0	0	-	-	-	-	1	5	0.196094	0.0041	1.7601	0.121627	0
GRM6	7	4	1.5602	0.3961	7.2745	0.555919	33	24	1.22736	0.7017	2.176	0.50577	5	0	Inf	1.0439	Inf	0.0223249	12	14	0.974474	0.4099	2.2803	1	2	7	0.269945	0.0273	1.4227	0.100482	12	8	1.42918	0.53	4.05	0.504121	0	1	0	0	38.4626	0.497	7	7	0.986049	0.2931	3.3176	1	2
GSG2/HASPIN	0	0	-	-	-	-	0	0	-	-	-	-	0	0	-	-	-	-	0	0	-	-	-	-	0	0	-	-	-	-	0	0	-	-	-	-	0	0	-	-	-	-	0	0	-	-	-	-	0
GZMB	1	0	Inf	0.0229	Inf	1	2	1	1.78209	0.0927	105.125	1	0	2	0	0	6.0546	0.501859	1	2	0.568347	0.0096	10.9311	1	0	0	-	-	-	-	2	5	0.378719	0.04	2.32	0.276519	0	0	-	-	-	-	1	0	Inf	0.0253	Inf	1	0
HCAR1	1	1	0.890862	0.0114	69.9182	1	1	3	0.296788	0.0057	3.6991	0.348595	1	0	Inf	0.0292	Inf	0.467905	1	0	Inf	0.0292	Inf	0.467905	0	1	0	0	37.0308	0.487047	1	2	0.474396	0.01	9.13	0.615334	0	0	-	-	-	-	0	1	0	0	38.4626	0.496528	0
HIST1H4E/H4C5	7	4	1.5602	0.3961	7.2745	0.555919	1	4	0.222542	0.0045	2.2504	0.19471	0	1	0	0	44.3203	1	2	1	2.27585	0.1183	134.307	0.602393	1	1	0.949449	0.0121	74.5661	1	1	0	Inf	0.02	Inf	1	0	0	-	-	-	-	0	0	-	-	-	-	1
HLA-DRB5	22	13	1.5112	0.7267	3.2724	0.30823	0	0	-	-	-	-	5	3	1.9	0.3685	12.2537	0.485656	0	0	-	-	-	-	2	4	0.473864	0.0428	3.3155	0.44114	0	0	-	-	-	-	3	0	Inf	0.4079	Inf	0.249	0	0	-	-	-	-	1
HTN1	0	0	-	-	-	-	0	0	-	-	-	-	0	1	0	0	44.3203	1	0	0	-	-	-	-	0	0	-	-	-	-	0	0	-	-	-	-	0	0	-	-	-	-	0	0	-	-	-	-	0
INPP5D	5	4	1.11374	0.2395	5.6197	1	8	6	1.18829	0.3611	4.1606	0.795125	1	0	Inf	0.0292	Inf	0.467905	3	3	1.13748	0.152	8.511	1	0	0	-	-	-	-	2	4	0.473864	0.04	3.32	0.44114	0	0	-	-	-	-	1	2	0.492523	0.0083	9.4857	0.622081	2
IQGAP2	2	3	0.593714	0.0496	5.1868	0.671539	16	13	1.09692	0.4937	2.4838	0.85381	1	2	0.57	0.0096	10.9311	1	4	7	0.648721	0.1389	2.5594	0.557182	3	0	Inf	0.3926	Inf	0.250115	4	1	3.80683	0.38	187.63	0.375192	3	3	0.986146	0.1315	7.3944	1	1	4	0.24553	0.005	2.4908	0.21472	1
IRAK4	8	4	1.78362	0.4772	8.1032	0.396815	13	10	1.15879	0.4686	2.9574	0.835335	1	2	0.57	0.0096	10.9311	1	3	5	0.681593	0.1056	3.512	0.730617	1	6	0.157524	0.0034	1.3021	0.0633603	3	5	0.568557	0.09	2.93	0.496684	0	1	0	0	38.4626	0.497	3	4	0.738498	0.1077	4.3863	0.723974	0
ITGA10	10	7	1.27352	0.4369	3.9478	0.808712	72	60	1.07073	0.7464	1.5407	0.72486	1	3	0.38	0.0072	4.7233	0.627786	34	44	0.875118	0.5383	1.4119	0.644951	1	2	0.474396	0.008	9.1272	0.615334	18	22	0.772833	0.39	1.52	0.429767	1	0	Inf	0.0253	Inf	1	9	13	0.677989	0.2536	1.7302	0.397386	2
KIF18A	0	1	0	0	34.7447	0.471146	3	4	0.667887	0.0977	3.952	0.7135	1	1	1.14	0.0145	89.2826	1	2	4	0.567974	0.0513	3.9715	0.690979	0	0	-	-	-	-	0	1	0	0	37.03	0.487047	0	2	0	0	5.2496	0.246	0	1	0	0	38.4626	0.496528	0
KIF4B	3	1	2.67373	0.2146	140.344	0.627366	0	1	0	0	34.7447	0.471146	1	1	1.14	0.0145	89.2826	1	0	0	-	-	-	-	2	0	Inf	0.1783	Inf	0.500077	1	1	0.949449	0.01	74.57	1	2	0	Inf	0.1853	Inf	0.5	1	0	Inf	0.0253	Inf	1	0
KRT36	18	14	1.14625	0.5375	2.4952	0.72644	2	0	Inf	0.1673	Inf	0.501579	5	6	0.95	0.2281	3.7372	1	0	0	-	-	-	-	5	0	Inf	0.8717	Inf	0.0625954	2	1	1.90019	0.1	112.19	1	0	7	0	0	0.68	0.007	0	0	-	-	-	-	3
KRT40	3	3	0.890791	0.1192	6.6567	1	12	9	1.18854	0.4588	3.1992	0.827631	0	0	-	-	-	-	2	3	0.757792	0.0632	6.6273	1	2	0	Inf	0.1783	Inf	0.500077	1	0	Inf	0.02	Inf	1	1	0	Inf	0.0253	Inf	1	2	3	0.656527	0.0547	5.7534	0.684805	0
LAMC3	11	5	1.96316	0.6278	7.2167	0.22165	9	10	0.801242	0.2876	2.1977	0.652538	2	0	Inf	0.2136	Inf	0.218834	3	4	0.852564	0.1246	5.051	1	3	1	2.85246	0.2286	149.876	0.625115	2	1	1.90019	0.1	112.19	1	0	1	0	0	38.4626	0.497	2	3	0.656527	0.0547	5.7534	0.684805	1
LDHD	0	0	-	-	-	-	10	10	0.890541	0.3321	2.388	0.825812	1	1	1.14	0.0145	89.2826	1	3	2	1.70723	0.1952	20.4684	0.669879	0	0	-	-	-	-	5	5	0.949244	0.22	4.14	1	0	0	-	-	-	-	2	0	Inf	0.1853	Inf	0.49959	0
LIPC	3	1	2.67373	0.2146	140.344	0.627366	50	32	1.39841	0.8768	2.2596	0.148512	2	4	0.57	0.0513	3.9715	0.690979	8	11	0.825907	0.2873	2.2632	0.818637	0	0	-	-	-	-	9	7	1.22268	0.4	3.88	0.803865	1	1	0.986193	0.0125	77.502	1	4	6	0.655334	0.1353	2.7802	0.54443	0
LRIG3	0	1	0	0	34.7447	0.471146	11	12	0.816011	0.3257	2.0238	0.678977	1	2	0.57	0.0096	10.9311	1	2	2	1.13736	0.0823	15.7096	1	0	0	-	-	-	-	0	2	0	0	5.05	0.237085	0	0	-	-	-	-	4	1	3.9609	0.3904	195.431	0.373973	0
MAGI1	2	0	Inf	0.1673	Inf	0.501579	14	5	2.50083	0.8498	8.8835	0.10476	0	0	-	-	-	-	3	3	1.13748	0.152	8.511	1	0	0	-	-	-	-	5	4	1.18771	0.25	6	1	1	1	0.986193	0.0125	77.502	1	1	2	0.492523	0.0083	9.4857	0.622081	1
MAK	2	2	0.890827	0.0645	12.2939	1	1	3	0.296788	0.0057	3.6991	0.348595	0	0	-	-	-	-	0	3	0	0	2.751	0.252789	2	0	Inf	0.1783	Inf	0.500077	1	1	0.949449	0.01	74.57	1	0	0	-	-	-	-	0	0	-	-	-	-	0
MAP1S	0	1	0	0	34.7447	0.471146	1	2	0.445317	0.0076	8.559	0.604605	0	0	-	-	-	-	0	0	-	-	-	-	0	0	-	-	-	-	0	0	-	-	-	-	0	0	-	-	-	-	1	0	Inf	0.0253	Inf	1	0
MAPT	3	2	1.33658	0.153	16.0067	1	10	14	0.63521	0.252	1.5405	0.308949	2	0	Inf	0.2136	Inf	0.218834	5	6	0.947436	0.2281	3.7372	1	0	1	0	0	37.0308	0.487047	2	3	0.632407	0.05	5.53	0.679486	0	0	-	-	-	-	0	1	0	0	38.4626	0.496528	0
MARCO	8	3	2.37885	0.5703	13.9367	0.234686	6	12	0.444412	0.1367	1.2815	0.103891	0	1	0	0	44.3203	1	4	1	4.55804	0.4503	224.539	0.192204	0	0	-	-	-	-	2	2	0.949398	0.07	13.12	1	1	0	Inf	0.0253	Inf	1	1	2	0.492523	0.0083	9.4857	0.622081	0
MCM5	0	1	0	0	34.7447	0.471146	14	9	1.3875	0.5583	3.6401	0.532345	0	1	0	0	44.3203	1	3	5	0.681593	0.1056	3.512	0.730617	0	0	-	-	-	-	1	3	0.315969	0.01	3.94	0.36215	0	0	-	-	-	-	1	2	0.492523	0.0083	9.4857	0.622081	0
MED23	16	11	1.29731	0.5643	3.0975	0.565639	18	11	1.46041	0.6519	3.4284	0.355611	2	2	1.14	0.0823	15.7096	1	5	4	1.4231	0.3055	7.1897	0.741942	0	1	0	0	37.0308	0.487047	2	4	0.473864	0.04	3.32	0.44114	2	0	Inf	0.1853	Inf	0.5	7	4	1.73391	0.438	8.1224	0.546968	0
METTL2A	0	2	0	0	4.7432	0.221935	0	0	-	-	-	-	1	0	Inf	0.0292	Inf	0.467905	0	0	-	-	-	-	0	0	-	-	-	-	0	0	-	-	-	-	0	0	-	-	-	-	0	0	-	-	-	-	0
MICAL1	19	15	1.12922	0.5425	2.3929	0.863538	11	5	1.96316	0.6278	7.2167	0.22165	1	2	0.57	0.0096	10.9311	1	4	3	1.51777	0.2562	10.386	0.712208	1	1	0.949449	0.0121	74.5661	1	2	0	Inf	0.18	Inf	0.500077	0	1	0	0	38.4626	0.497	0	3	0	0	2.3841	0.12209	1
MMP27	1	0	Inf	0.0229	Inf	1	2	3	0.593714	0.0496	5.1868	0.671539	1	0	Inf	0.0292	Inf	0.467905	0	0	-	-	-	-	0	2	0	0	5.0547	0.237085	0	1	0	0	37.03	0.487047	1	1	0.986193	0.0125	77.502	1	0	0	-	-	-	-	0
MST1L	10	9	0.989834	0.3609	2.7576	1	0	0	-	-	-	-	6	6	1.14	0.3033	4.2691	1	0	0	-	-	-	-	1	2	0.474396	0.008	9.1272	0.615334	0	0	-	-	-	-	0	2	0	0	5.2496	0.246	0	0	-	-	-	-	4
MTMR11	53	29	1.63905	1.02	2.682	0.0342149	18	14	1.14625	0.5375	2.4952	0.72644	18	20	1.02	0.5079	2.0497	1	7	4	1.99553	0.5058	9.3205	0.365957	12	16	0.708719	0.3043	1.6064	0.447363	2	0	Inf	0.18	Inf	0.500077	5	4	1.23456	0.2642	6.2546	1	1	1	0.986193	0.0125	77.502	1	7
MYH7B	21	23	0.812158	0.4265	1.5388	0.545552	47	44	0.950855	0.6146	1.4735	0.832943	10	8	1.42	0.5044	4.17	0.485593	19	11	1.97974	0.8909	4.6258	0.0960076	7	4	1.66589	0.4219	7.7869	0.549177	16	13	1.17128	0.53	2.66	0.711713	3	6	0.490763	0.079	2.3111	0.339	8	5	1.58538	0.4541	6.198	0.578979	4
NADSYN1	5	6	0.742022	0.1789	2.9218	0.765123	18	20	0.800656	0.3984	1.5978	0.518034	5	1	5.7	0.6368	269.745	0.104414	5	6	0.947436	0.2281	3.7372	1	3	1	2.85246	0.2286	149.876	0.625115	1	2	0.474396	0.01	9.13	0.615334	0	0	-	-	-	-	3	1	2.96645	0.2374	155.998	0.624384	0
NCKAP1L	2	1	1.78209	0.0927	105.125	1	12	4	2.67865	0.8107	11.4121	0.0841899	0	1	0	0	44.3203	1	3	3	1.13748	0.152	8.511	1	1	1	0.949449	0.0121	74.5661	1	4	0	Inf	0.63	Inf	0.125115	0	0	-	-	-	-	1	3	0.327849	0.0062	4.0968	0.370903	0
NEK1	3	4	0.667887	0.0977	3.952	0.7135	7	11	0.565994	0.1858	1.6014	0.247552	2	3	0.76	0.0632	6.6273	1	4	4	1.1376	0.2114	6.1218	1	0	1	0	0	37.0308	0.487047	1	4	0.236778	0	2.4	0.206743	2	3	0.656527	0.0547	5.7534	0.685	1	5	0.196094	0.0041	1.7601	0.121627	0
NIPBL	5	6	0.742022	0.1789	2.9218	0.765123	22	27	0.723969	0.392	1.3235	0.314541	0	0	-	-	-	-	5	8	0.709587	0.1821	2.4679	0.590354	0	0	-	-	-	-	8	6	1.268	0.38	4.45	0.790756	0	0	-	-	-	-	1	8	0.121931	0.0027	0.9143	0.0202363	0
NLRP12	2	2	0.890827	0.0645	12.2939	1	8	8	0.890613	0.2909	2.7261	1	2	5	0.45	0.0432	2.7799	0.459213	3	2	1.70723	0.1952	20.4684	0.669879	0	0	-	-	-	-	2	6	0.315278	0.03	1.77	0.168578	4	0	Inf	0.6524	Inf	0.124	2	4	0.491644	0.0443	3.4459	0.44889	2
NR3C2	0	0	-	-	-	-	1	0	Inf	0.0229	Inf	1	1	0	Inf	0.0292	Inf	0.467905	0	0	-	-	-	-	0	0	-	-	-	-	0	0	-	-	-	-	0	0	-	-	-	-	1	0	Inf	0.0253	Inf	1	0
NTRK3	1	0	Inf	0.0229	Inf	1	7	3	2.08088	0.4745	12.4833	0.351498	0	0	-	-	-	-	7	7	1.13796	0.3395	3.8144	1	0	0	-	-	-	-	0	2	0	0	5.05	0.237085	0	0	-	-	-	-	1	1	0.986193	0.0125	77.502	1	0
NUDT1	1	1	0.890862	0.0114	69.9182	1	1	1	0.890862	0.0114	69.9182	1	0	0	-	-	-	-	2	2	1.13736	0.0823	15.7096	1	0	0	-	-	-	-	0	0	-	-	-	-	2	0	Inf	0.1853	Inf	0.5	1	0	Inf	0.0253	Inf	1	0
OPRM1	2	0	Inf	0.1673	Inf	0.501579	6	8	0.667562	0.1907	2.197	0.593919	0	4	0	0	1.7213	0.12779	6	3	2.28028	0.4857	14.1228	0.319707	0	0	-	-	-	-	2	1	1.90019	0.1	112.19	1	0	0	-	-	-	-	0	1	0	0	38.4626	0.496528	1
OR4F17	0	0	-	-	-	-	0	0	-	-	-	-	0	0	-	-	-	-	0	0	-	-	-	-	0	0	-	-	-	-	0	0	-	-	-	-	0	0	-	-	-	-	0	0	-	-	-	-	0
OTOP1	6	6	0.890684	0.2378	3.3361	1	1	0	Inf	0.0229	Inf	1	4	2	2.28	0.3258	25.2266	0.427563	0	0	-	-	-	-	4	4	0.949296	0.1763	5.1121	1	0	0	-	-	-	-	1	1	0.986193	0.0125	77.502	1	0	0	-	-	-	-	0
PAK6	0	1	0	0	34.7447	0.471146	2	6	0.296559	0.0292	1.6603	0.159343	1	0	Inf	0.0292	Inf	0.467905	4	1	4.55804	0.4503	224.539	0.192204	0	0	-	-	-	-	5	1	4.76316	0.53	225.44	0.218966	0	0	-	-	-	-	2	0	Inf	0.1853	Inf	0.49959	0
PARP2	1	0	Inf	0.0229	Inf	1	4	6	0.593449	0.123	2.5056	0.531232	3	2	1.71	0.1952	20.4684	0.669879	2	3	0.757792	0.0632	6.6273	1	0	1	0	0	37.0308	0.487047	3	1	2.85246	0.23	149.88	0.625115	0	0	-	-	-	-	0	1	0	0	38.4626	0.496528	0
PBXIP1	4	0	Inf	0.5883	Inf	0.12737	1	0	Inf	0.0229	Inf	1	0	1	0	0	44.3203	1	0	1	0	0	44.3203	1	0	0	-	-	-	-	0	0	-	-	-	-	0	1	0	0	38.4626	0.497	0	0	-	-	-	-	2
PCBP4	0	1	0	0	34.7447	0.471146	0	0	-	-	-	-	0	0	-	-	-	-	1	2	0.568347	0.0096	10.9311	1	0	0	-	-	-	-	1	1	0.949449	0.01	74.57	1	0	0	-	-	-	-	0	0	-	-	-	-	0
PCK2	56	45	1.11063	0.734	1.6888	0.61673	18	13	1.23486	0.5708	2.7468	0.593327	18	14	1.47	0.6869	3.207	0.290804	10	12	0.947207	0.3651	2.4023	1	16	10	1.52738	0.6479	3.7852	0.32793	4	6	0.631661	0.13	2.67	0.53845	12	8	1.48892	0.5548	4.2333	0.5	0	0	-	-	-	-	9
PDCD11	2	1	1.78209	0.0927	105.125	1	6	9	0.593183	0.1735	1.8688	0.438546	0	2	0	0	6.0546	0.501859	3	5	0.681593	0.1056	3.512	0.730617	0	0	-	-	-	-	5	3	1.58507	0.31	10.24	0.726731	0	0	-	-	-	-	1	0	Inf	0.0253	Inf	1	0
PDS5B	0	1	0	0	34.7447	0.471146	4	7	0.508497	0.109	2.0027	0.367693	0	0	-	-	-	-	2	2	1.13736	0.0823	15.7096	1	0	0	-	-	-	-	0	3	0	0	2.3	0.115345	0	0	-	-	-	-	3	2	1.4813	0.169	17.7904	1	0
PHAX	1	0	Inf	0.0229	Inf	1	2	0	Inf	0.1673	Inf	0.501579	0	0	-	-	-	-	1	1	1.13725	0.0145	89.2826	1	1	1	0.949449	0.0121	74.5661	1	1	0	Inf	0.02	Inf	1	0	0	-	-	-	-	1	0	Inf	0.0253	Inf	1	0
PHF2	1	0	Inf	0.0229	Inf	1	5	1	4.45898	0.4985	210.821	0.223188	0	0	-	-	-	-	0	3	0	0	2.751	0.252789	0	0	-	-	-	-	0	2	0	0	5.05	0.237085	0	0	-	-	-	-	0	1	0	0	38.4626	0.496528	0
PHRF1	2	2	0.890827	0.0645	12.2939	1	2	4	0.445136	0.0402	3.1086	0.429922	0	0	-	-	-	-	2	0	Inf	0.2136	Inf	0.218834	0	1	0	0	37.0308	0.487047	2	1	1.90019	0.1	112.19	1	1	0	Inf	0.0253	Inf	1	0	0	-	-	-	-	0
PIK3CG	4	1	3.56604	0.3526	175.577	0.378943	8	6	1.18829	0.3611	4.1606	0.795125	0	1	0	0	44.3203	1	6	2	3.42254	0.6105	34.7429	0.157375	0	0	-	-	-	-	3	1	2.85246	0.23	149.88	0.625115	0	0	-	-	-	-	2	2	0.98617	0.0713	13.6438	1	0
PINX1	1	2	0.445317	0.0076	8.559	0.604605	5	5	0.89072	0.2048	3.875	1	1	0	Inf	0.0292	Inf	0.467905	3	1	3.41625	0.2739	179.393	0.345786	1	0	Inf	0.0243	Inf	1	3	6	0.473331	0.08	2.22	0.331272	0	0	-	-	-	-	1	2	0.492523	0.0083	9.4857	0.622081	1
PLD2	5	9	0.494172	0.1299	1.6444	0.283862	9	9	0.890577	0.3127	2.5363	0.817906	4	4	1.14	0.2114	6.1218	1	2	5	0.454082	0.0432	2.7799	0.459213	9	4	2.14588	0.5965	9.5697	0.267331	4	2	1.90202	0.27	21.07	0.687644	2	3	0.656527	0.0547	5.7534	0.685	2	1	1.97465	0.1025	116.689	1	0
POLR3A	3	3	0.890791	0.1192	6.6567	1	43	43	0.889348	0.5671	1.3948	0.588753	1	1	1.14	0.0145	89.2826	1	15	17	1.00344	0.4643	2.1469	1	2	3	0.632407	0.0527	5.5334	0.679486	10	7	1.35984	0.47	4.23	0.629522	0	0	-	-	-	-	8	6	1.31903	0.3985	4.6428	0.789315	0
PRKCG	0	0	-	-	-	-	0	0	-	-	-	-	0	0	-	-	-	-	1	2	0.568347	0.0096	10.9311	1	0	0	-	-	-	-	1	1	0.949449	0.01	74.57	1	0	0	-	-	-	-	0	0	-	-	-	-	0
PRMT9	1	1	0.890862	0.0114	69.9182	1	6	7	0.763187	0.2116	2.6558	0.782588	0	1	0	0	44.3203	1	3	0	Inf	0.4702	Inf	0.102299	2	1	1.90019	0.0988	112.189	1	3	0	Inf	0.39	Inf	0.250115	1	2	0.492523	0.0083	9.4857	0.622	1	2	0.492523	0.0083	9.4857	0.622081	0
PRRC2C	5	1	4.45898	0.4985	210.821	0.223188	5	4	1.11374	0.2395	5.6197	1	2	0	Inf	0.2136	Inf	0.218834	0	0	-	-	-	-	0	0	-	-	-	-	0	0	-	-	-	-	1	1	0.986193	0.0125	77.502	1	0	0	-	-	-	-	1
PTCH1	1	0	Inf	0.0229	Inf	1	22	20	0.979822	0.5089	1.8971	1	0	0	-	-	-	-	8	11	0.825907	0.2873	2.2632	0.818637	1	0	Inf	0.0243	Inf	1	9	7	1.22268	0.4	3.88	0.803865	0	0	-	-	-	-	6	7	0.843829	0.2327	2.9525	0.788012	0
PTK2B	1	0	Inf	0.0229	Inf	1	12	8	1.33757	0.5019	3.7779	0.655119	0	0	-	-	-	-	2	0	Inf	0.2136	Inf	0.218834	2	1	1.90019	0.0988	112.189	1	5	5	0.949244	0.22	4.14	1	0	0	-	-	-	-	2	3	0.656527	0.0547	5.7534	0.684805	0
PTPRN	1	0	Inf	0.0229	Inf	1	3	8	0.333488	0.0569	1.3912	0.129171	2	0	Inf	0.2136	Inf	0.218834	2	2	1.13736	0.0823	15.7096	1	0	1	-	-	-	-	4	0	Inf	0.63	Inf	0.125115	0	0	-	-	-	-	1	1	0.986193	0.0125	77.502	1	0
PYROXD1	0	1	0	0	34.7447	0.471146	4	2	1.7826	0.2552	19.7131	0.690454	0	1	-	-	-	-	5	2	2.84981	0.4655	29.9829	0.263106	0	1	-	-	-	-	3	2	1.42527	0.16	17.09	1	0	0	-	-	-	-	1	0	Inf	0.0253	Inf	1	1
RAD1	9	5	1.60523	0.4824	6.105	0.434311	0	1	0	0	34.7447	0.471146	1	1	1.14	0.0145	89.2826	1	0	0	-	-	-	-	2	3	0.632407	0.0527	5.5334	0.679486	2	0	Inf	0.18	Inf	0.500077	0	0	-	-	-	-	0	0	-	-	-	-	3
RASA2	0	1	0	0	34.7447	0.471146	4	4	0.890756	0.1658	4.7871	1	2	1	2.28	0.1183	134.307	0.602393	2	0	Inf	0.2136	Inf	0.218834	0	2	0	0	5.0547	0.237085	2	1	1.90019	0.1	112.19	1	1	0	Inf	0.0253	Inf	1	1	1	0.986193	0.0125	77.502	1	0
RASEF	2	5	0.355992	0.0339	2.1765	0.26545	2	6	0.296559	0.0292	1.6603	0.159343	2	0	Inf	0.2136	Inf	0.218834	2	4	0.567974	0.0513	3.9715	0.690979	4	1	3.80683	0.3759	187.628	0.375192	3	1	2.85246	0.23	149.88	0.625115	0	0	-	-	-	-	0	1	0	0	38.4626	0.496528	0
RGS22	4	8	0.444774	0.0979	1.6624	0.247557	1	7	0.127022	0.0028	0.9897	0.0302482	1	0	Inf	0.0292	Inf	0.467905	1	1	1.13725	0.0145	89.2826	1	1	0	Inf	0.0243	Inf	1	0	0	-	-	-	-	0	0	-	-	-	-	0	0	-	-	-	-	0
RIC1	7	8	0.779053	0.2402	2.4621	0.796819	12	11	0.971755	0.3919	2.4349	1	0	0	-	-	-	-	7	7	1.13796	0.3395	3.8144	1	0	1	0	0	37.0308	0.487047	6	3	1.90385	0.41	11.8	0.508116	0	1	0	0	38.4626	0.497	11	2	5.50282	1.1931	51.2983	0.0217777	0
RNF175	3	5	0.534135	0.0829	2.7482	0.487602	5	3	1.48549	0.2887	9.572	0.730005	1	3	0.38	0.0072	4.7233	0.627786	4	2	2.27806	0.3258	25.2266	0.427563	9	2	4.29981	0.8867	41.0127	0.0656509	4	3	1.26692	0.21	8.67	1	8	1	7.97513	1.0635	354.401	0.038	2	3	0.656527	0.0547	5.7534	0.684805	0
RNF181	5	1	4.45898	0.4985	210.821	0.223188	2	2	0.890827	0.0645	12.2939	1	0	2	0	0	6.0546	0.501859	1	0	Inf	0.0292	Inf	0.467905	0	0	-	-	-	-	0	1	0	0	37.03	0.487047	0	0	-	-	-	-	0	1	0	0	38.4626	0.496528	0
SCN7A	8	3	2.37885	0.5703	13.9367	0.234686	19	14	1.21031	0.5741	2.6142	0.605538	0	2	0	0	6.0546	0.501859	7	9	0.883827	0.2788	2.6765	1	1	0	Inf	0.0243	Inf	1	3	7	0.405299	0.07	1.78	0.214722	2	0	Inf	0.1853	Inf	0.5	2	7	0.279534	0.0282	1.4766	0.10578	1
SEC23B	4	3	1.18805	0.2008	8.1194	1	19	20	0.845405	0.4259	1.6727	0.631914	1	0	Inf	0.0292	Inf	0.467905	10	10	1.13832	0.4235	3.0596	0.824526	1	1	0.949449	0.0121	74.5661	1	8	2	3.81825	0.76	36.96	0.109644	0	0	-	-	-	-	5	5	0.986097	0.2256	4.3097	1	1
SERPINB10	0	0	-	-	-	-	6	2	2.67537	0.4779	27.1361	0.295268	0	0	-	-	-	-	1	0	Inf	0.0292	Inf	0.467905	0	0	-	-	-	-	0	2	0	0	5.05	0.237085	0	0	-	-	-	-	1	1	0.986193	0.0125	77.502	1	0
SERPINF1	1	1	0.890862	0.0114	69.9182	1	6	8	0.667562	0.1907	2.197	0.593919	0	1	0	0	44.3203	1	1	3	0.378678	0.0072	4.7233	0.627786	0	0	-	-	-	-	3	4	0.711375	0.1	4.22	0.719586	0	0	-	-	-	-	5	1	4.9593	0.5525	234.987	0.217595	0
SGSM3	2	0	Inf	0.1673	Inf	0.501579	6	14	0.380655	0.1197	1.0562	0.0447726	1	0	Inf	0.0292	Inf	0.467905	2	3	0.757792	0.0632	6.6273	1	1	0	Inf	0.0243	Inf	1	0	5	0	0	1.03	0.0272569	0	1	0	0	38.4626	0.497	0	2	0	0	5.2496	0.246323	1
SH2D6	1	1	0.890862	0.0114	69.9182	1	3	1	2.67373	0.2146	140.344	0.627366	0	0	-	-	-	-	0	1	0	0	44.3203	1	0	0	-	-	-	-	0	0	-	-	-	-	0	0	-	-	-	-	0	0	-	-	-	-	0
SIPA1L1	0	0	-	-	-	-	21	15	1.24889	0.6123	2.6099	0.616099	0	0	-	-	-	-	11	10	1.25319	0.4812	3.3047	0.664175	0	0	-	-	-	-	12	3	3.82976	1.03	21.21	0.0353581	0	0	-	-	-	-	6	0	Inf	1.1666	Inf	0.0308663	0
SIRT3	5	7	0.635805	0.1589	2.3302	0.565735	10	10	0.890541	0.3321	2.388	0.825812	1	2	0.57	0.0096	10.9311	1	1	5	0.226887	0.0048	2.0318	0.223975	1	5	0.189226	0.004	1.6954	0.115429	1	5	0.189226	0	1.7	0.115429	0	0	-	-	-	-	0	1	0	0	38.4626	0.496528	0
SLC10A6	2	0	Inf	0.1673	Inf	0.501579	1	1	0.890862	0.0114	69.9182	1	1	0	Inf	0.0292	Inf	0.467905	1	0	Inf	0.0292	Inf	0.467905	0	2	0	0	5.0547	0.237085	1	1	0.949449	0.01	74.57	1	0	0	-	-	-	-	0	0	-	-	-	-	0
SLC22A10	5	1	4.45898	0.4985	210.821	0.223188	3	0	Inf	0.3682	Inf	0.252369	2	0	Inf	0.2136	Inf	0.218834	0	0	-	-	-	-	1	2	0.474396	0.008	9.1272	0.615334	2	1	1.90019	0.1	112.19	1	1	1	0.986193	0.0125	77.502	1	0	0	-	-	-	-	1
SLC22A13	2	2	0.890827	0.0645	12.2939	1	4	3	1.18805	0.2008	8.1194	1	3	3	1.14	0.152	8.511	1	3	4	0.852564	0.1246	5.051	1	0	3	0	0	2.2962	0.115345	1	2	0.474396	0.01	9.13	0.615334	1	1	0.986193	0.0125	77.502	1	1	1	0.986193	0.0125	77.502	1	4
SLC22A5	0	1	0	0	34.7447	0.471146	19	12	1.41303	0.6498	3.1983	0.37269	3	1	3.42	0.2739	179.393	0.345786	11	6	2.09461	0.7074	6.922	0.150715	1	1	0.949449	0.0121	74.5661	1	10	6	1.58806	0.52	5.34	0.455068	0	0	-	-	-	-	0	3	0	0	2.3841	0.12209	4
SLC2A8	15	8	1.67354	0.6648	4.5646	0.29669	16	18	0.790838	0.3765	1.6466	0.49748	3	3	1.14	0.152	8.511	1	6	6	1.13784	0.3033	4.2691	1	3	2	1.42527	0.1629	17.093	1	6	5	1.14017	0.29	4.74	1	0	0	-	-	-	-	3	4	0.738498	0.1077	4.3863	0.723974	0
SLC4A7	0	5	0	0	0.9715	0.0231705	12	8	1.33757	0.5019	3.7779	0.655119	0	0	-	-	-	-	10	6	1.9026	0.6242	6.3904	0.22031	0	0	-	-	-	-	3	0	Inf	0.39	Inf	0.250115	0	0	-	-	-	-	1	6	0.163135	0.0035	1.3511	0.067746	0
SLC4A8	0	1	0	0	34.7447	0.471146	10	8	1.11393	0.3952	3.253	1	0	0	-	-	-	-	2	0	Inf	0.2136	Inf	0.218834	0	0	-	-	-	-	1	5	0.189226	0	1.7	0.115429	0	0	-	-	-	-	1	1	0.986193	0.0125	77.502	1	0
SLC4A9	9	7	1.14582	0.3791	3.6255	0.808539	34	24	1.26496	0.7263	2.2358	0.42857	1	2	0.57	0.0096	10.9311	1	3	3	1.13748	0.152	8.511	1	1	2	0.474396	0.008	9.1272	0.615334	1	3	0.315969	0.01	3.94	0.36215	3	0	Inf	0.4079	Inf	0.249	4	6	0.655334	0.1353	2.7802	0.54443	0
SLX4	4	4	0.890756	0.1658	4.7871	1	2	4	0.445136	0.0402	3.1086	0.429922	2	1	2.28	0.1183	134.307	0.602393	0	1	0	0	44.3203	1	1	2	0.474396	0.008	9.1272	0.615334	0	0	-	-	-	-	0	0	-	-	-	-	0	0	-	-	-	-	1
SMARCA2	3	0	Inf	0.3682	Inf	0.252369	9	5	1.60523	0.4824	6.105	0.434311	0	1	0	0	44.3203	1	2	1	2.27585	0.1183	134.307	0.602393	0	0	-	-	-	-	3	0	Inf	0.39	Inf	0.250115	0	0	-	-	-	-	0	0	-	-	-	-	0
SMARCAL1	7	5	1.24775	0.3404	4.9917	0.778663	40	29	1.23177	0.7425	2.0664	0.466953	2	0	Inf	0.2136	Inf	0.218834	16	16	1.13905	0.5306	2.4452	0.725245	1	1	0.949449	0.0121	74.5661	1	4	3	1.26692	0.21	8.67	1	1	1	0.986193	0.0125	77.502	1	7	11	0.623293	0.2033	1.7753	0.35245	0
SPATA21	0	1	0	0	34.7447	0.471146	1	2	0.445317	0.0076	8.559	0.604605	2	1	2.28	0.1183	134.307	0.602393	0	0	-	-	-	-	0	1	0	0	37.0308	0.487047	0	0	-	-	-	-	0	1	0	0	38.4626	0.497	1	0	Inf	0.0253	Inf	1	1
SUPT3H	1	4	0.222542	0.0045	2.2504	0.19471	3	4	0.667887	0.0977	3.952	0.7135	3	1	3.42	0.2739	179.393	0.345786	0	0	-	-	-	-	1	0	Inf	0.0243	Inf	1	0	0	-	-	-	-	0	0	-	-	-	-	0	1	0	0	38.4626	0.496528	2
SUPT6H	0	0	-	-	-	-	11	12	0.816011	0.3257	2.0238	0.678977	0	0	-	-	-	-	8	8	1.13808	0.3711	3.4909	0.807361	0	0	-	-	-	-	3	6	0.473331	0.08	2.22	0.331272	0	0	-	-	-	-	0	4	0	0	1.4908	0.0604608	0
TAB1	0	1	0	0	34.7447	0.471146	4	2	1.7826	0.2552	19.7131	0.690454	1	0	Inf	0.0292	Inf	0.467905	2	3	0.757792	0.0632	6.6273	1	1	0	Inf	0.0243	Inf	1	3	0	Inf	0.39	Inf	0.250115	0	0	-	-	-	-	1	0	Inf	0.0253	Inf	1	0
TARDBP	0	0	-	-	-	-	2	1	1.78209	0.0927	105.125	1	0	0	-	-	-	-	0	0	-	-	-	-	0	0	-	-	-	-	0	0	-	-	-	-	0	0	-	-	-	-	0	0	-	-	-	-	0
TCF7	2	0	Inf	0.1673	Inf	0.501579	10	9	0.989834	0.3609	2.7576	1	0	0	-	-	-	-	1	4	0.283814	0.0058	2.8731	0.379643	0	0	-	-	-	-	0	0	-	-	-	-	0	0	-	-	-	-	1	2	0.492523	0.0083	9.4857	0.622081	0
TCF7L2	0	0	-	-	-	-	11	5	1.96316	0.6278	7.2167	0.22165	0	0	-	-	-	-	4	5	0.909497	0.18	4.2364	1	0	0	-	-	-	-	6	2	2.85809	0.51	29.03	0.289365	0	0	-	-	-	-	2	0	Inf	0.1853	Inf	0.49959	0
TIAM2	5	4	1.11374	0.2395	5.6197	1	11	16	0.611144	0.256	1.405	0.247336	2	0	Inf	0.2136	Inf	0.218834	6	4	1.70907	0.4041	8.2552	0.529647	0	0	-	-	-	-	7	3	2.22315	0.51	13.36	0.34413	0	0	-	-	-	-	6	1	5.96111	0.7198	274.667	0.123923	0
TMEM161A	2	0	Inf	0.1673	Inf	0.501579	11	4	2.45467	0.7263	10.5843	0.127146	0	1	0	0	44.3203	1	3	2	1.70723	0.1952	20.4684	0.669879	0	0	-	-	-	-	3	3	0.949347	0.13	7.11	1	0	0	-	-	-	-	7	0	Inf	1.4302	Inf	0.0153569	0
TMEM206/PACC1	23	8	2.57255	1.1087	6.6631	0.0186314	7	5	1.24775	0.3404	4.9917	0.778663	9	12	0.85	0.3157	2.2117	0.827526	1	1	1.13725	0.0145	89.2826	1	8	4	1.90569	0.5085	8.6775	0.388144	0	0	-	-	-	-	7	4	1.73391	0.438	8.1224	0.547	2	1	1.97465	0.1025	116.689	1	9
TNC	2	5	0.355992	0.0339	2.1765	0.26545	18	13	1.23486	0.5708	2.7468	0.593327	0	0	-	-	-	-	6	10	0.680764	0.2027	2.0749	0.61678	0	0	-	-	-	-	3	5	0.568557	0.09	2.93	0.496684	0	0	-	-	-	-	4	2	1.97803	0.2822	21.9474	0.686729	0
TNK1	3	3	0.890791	0.1192	6.6567	1	5	2	2.22883	0.3646	23.4242	0.458294	3	6	0.57	0.0916	2.6648	0.515111	0	1	0	0	44.3203	1	2	1	1.90019	0.0988	112.189	1	0	1	0	0	37.03	0.487047	1	1	0.986193	0.0125	77.502	1	1	2	0.492523	0.0083	9.4857	0.622081	4
TP53TG5	4	2	1.7826	0.2552	19.7131	0.690454	0	0	-	-	-	-	1	0	Inf	0.0292	Inf	0.467905	0	0	-	-	-	-	1	1	0.949449	0.0121	74.5661	1	0	0	-	-	-	-	0	1	0	0	38.4626	0.497	0	0	-	-	-	-	1
TRIM42	2	1	1.78209	0.0927	105.125	1	3	4	0.667887	0.0977	3.952	0.7135	0	3	0	0	2.751	0.252789	0	1	0	0	44.3203	1	1	1	0.949449	0.0121	74.5661	1	0	1	0	0	37.03	0.487047	0	0	-	-	-	-	0	0	-	-	-	-	0
TRIM63	5	10	0.444593	0.1191	1.4297	0.193993	3	4	0.667887	0.0977	3.952	0.7135	2	1	2.28	0.1183	134.307	0.602393	3	1	3.41625	0.2739	179.393	0.345786	1	2	0.474396	0.008	9.1272	0.615334	1	0	Inf	0.02	Inf	1	4	2	1.97803	0.2822	21.9474	0.687	1	0	Inf	0.0253	Inf	1	1
TRIO	17	13	1.16588	0.5322	2.6154	0.717285	20	18	0.9898	0.496	1.9891	1	0	1	0	0	44.3203	1	11	11	1.13844	0.4457	2.9078	0.831727	1	0	Inf	0.0243	Inf	1	7	8	0.829685	0.26	2.63	0.798714	0	0	-	-	-	-	4	4	0.986122	0.1827	5.3217	1	0
TRPM1	5	2	2.22883	0.3646	23.4242	0.458294	21	9	2.08584	0.9139	5.182	0.0673654	4	1	4.56	0.4503	224.539	0.192204	10	17	0.666161	0.2714	1.5477	0.337846	1	1	0.949449	0.0121	74.5661	1	5	6	0.790285	0.19	3.12	0.768719	1	1	0.986193	0.0125	77.502	1	2	1	1.97465	0.1025	116.689	1	1
TRPM4	31	44	0.623924	0.3797	1.0139	0.0478134	13	12	0.964965	0.4052	2.3181	1	9	14	0.73	0.2772	1.8162	0.532315	1	6	0.188934	0.0041	1.5608	0.12988	6	9	0.630913	0.184	1.9936	0.443065	4	3	1.26692	0.21	8.67	1	15	6	2.50266	0.9095	7.9306	0.076	3	2	1.4813	0.169	17.7904	1	2
TSEN2	0	1	0	0	34.7447	0.471146	1	2	0.445317	0.0076	8.559	0.604605	1	1	1.14	0.0145	89.2826	1	5	2	2.84981	0.4655	29.9829	0.263106	0	0	-	-	-	-	1	0	Inf	0.02	Inf	1	0	0	-	-	-	-	0	0	-	-	-	-	0
TTC6	49	31	1.4147	0.8813	2.3024	0.143197	2	3	0.593714	0.0496	5.1868	0.671539	23	25	1.05	0.5645	1.9344	0.884954	2	1	2.27585	0.1183	134.307	0.602393	12	17	0.666329	0.2887	1.4897	0.350025	0	0	-	-	-	-	9	8	1.1111	0.3775	3.335	1	2	1	1.97465	0.1025	116.689	1	6
TXLNA	0	0	-	-	-	-	0	5	0	0	0.9715	0.0231705	0	0	-	-	-	-	1	1	1.13725	0.0145	89.2826	1	0	0	-	-	-	-	1	0	Inf	0.02	Inf	1	0	0	-	-	-	-	0	0	-	-	-	-	0
TYRO3	83	49	1.52307	1.0529	2.2235	0.0216754	2	8	0.222289	0.023	1.115	0.0539093	11	13	0.96	0.3886	2.337	1	0	3	0	0	2.751	0.252789	16	11	1.38711	0.6009	3.3243	0.443046	0	2	0	0	5.05	0.237085	18	13	1.37684	0.6309	3.0883	0.467	2	0	Inf	0.1853	Inf	0.49959	3
UBE2U	5	8	0.556138	0.143	1.9307	0.405997	0	2	0	0	4.7432	0.221935	0	0	-	-	-	-	0	0	-	-	-	-	2	2	0.949398	0.0687	13.1187	1	0	0	-	-	-	-	1	1	0.986193	0.0125	77.502	1	0	0	-	-	-	-	1
USP5	1	0	Inf	0.0229	Inf	1	6	5	1.0692	0.2715	4.4339	1	0	1	0	0	44.3203	1	4	0	Inf	0.7515	Inf	0.0478004	0	0	-	-	-	-	0	1	0	0	37.03	0.487047	0	0	-	-	-	-	0	1	0	0	38.4626	0.496528	0
UVSSA	2	7	0.254083	0.0257	1.3361	0.0935288	2	5	0.355992	0.0339	2.1765	0.26545	2	1	2.28	0.1183	134.307	0.602393	0	3	0	0	2.751	0.252789	1	0	Inf	0.0243	Inf	1	1	2	0.474396	0.01	9.13	0.615334	1	1	0.986193	0.0125	77.502	1	0	1	0	0	38.4626	0.496528	0
WRNIP1	2	0	Inf	0.1673	Inf	0.501579	13	10	1.15879	0.4686	2.9574	0.835335	0	0	-	-	-	-	2	3	0.757792	0.0632	6.6273	1	1	0	Inf	0.0243	Inf	1	4	4	0.949296	0.18	5.11	1	0	0	-	-	-	-	4	3	1.31681	0.2217	9.0277	1	0
XDH	12	9	1.18854	0.4588	3.1992	0.827631	22	19	1.03177	0.5317	2.0204	1	5	6	0.95	0.2281	3.7372	1	10	12	0.947207	0.3651	2.4023	1	3	2	1.42527	0.1629	17.093	1	8	5	1.52309	0.44	5.94	0.581445	2	0	Inf	0.1853	Inf	0.5	2	3	0.656527	0.0547	5.7534	0.684805	1
ZBTB39	0	0	-	-	-	-	2	0	Inf	0.1673	Inf	0.501579	0	0	-	-	-	-	2	1	2.27585	0.1183	134.307	0.602393	0	0	-	-	-	-	2	3	0.632407	0.05	5.53	0.679486	0	0	-	-	-	-	1	1	0.986193	0.0125	77.502	1	0
ZFAND1	57	28	1.82878	1.1403	2.9953	0.00851586	7	8	0.779053	0.2402	2.4621	0.796819	1	0	Inf	0.0292	Inf	0.467905	3	2	1.70723	0.1952	20.4684	0.669879	0	0	-	-	-	-	5	1	4.76316	0.53	225.44	0.218966	0	0	-	-	-	-	1	0	Inf	0.0253	Inf	1	1
ZWINT	4	1	3.56604	0.3526	175.577	0.378943	0	0	-	-	-	-	1	1	1.14	0.0145	89.2826	1	0	1	0	0	44.3203	1	0	0	-	-	-	-	1	0	Inf	0.02	Inf	1	1	0	Inf	0.0253	Inf	1	0	0	-	-	-	-	0
[truncated: 11 more columns]
