# Supplementary material for: Uncovering the Contribution of Moderate-Penetrance Susceptibility Genes to Breast Cancer by Whole-Exome Sequencing and Targeted Enrichment Sequencing of Candidate Genes in Women of European Ancestry
Source: Cancers (Basel). 2022 Jul 11;14(14):3363. doi: 10.3390/cancers14143363 (PMC9317824; doi:10.3390/cancers14143363)
Supplement: Supplementary file 1 [file cancers-14-03363-s001.zip › Table S10-final_16052022.xlsx]

## Sheet: Table 10A
Associations with ER-negative breast cancer risk of loss of function and rare missense variants in 178 genes idendified at the discovery stage (808 cases, 6019 controls)
Gene	Loss of function variants carriers		OR	95 %CI		p-value	Rare missense variants carriers		OR	95 %CI		p-value	Combined Loss of function and Rare missenses variants carriers		OR	95 %CI		p-value
	Cases	Controls					Cases	Controls					Cases	Controls
ABCG2	3	9	2.92203	0.755	11.314	0.120562	2	17	0.656633	0.151	2.858	0.575107	5	26	1.24625	0.472	3.289	0.65659
ADAM29	0	0	-	-	-	-	0	0	-	-	-	-	0	0	-	-	-	-
ADAMTS12	1	9	0.924431	0.112	7.646	0.94189	6	61	0.724097	0.309	1.696	0.457289	7	70	0.746827	0.339	1.646	0.46898
ADRA1A	2	11	1.0282	0.226	4.678	0.971301	0	11	0	0	Inf	0.989372	2	22	0.5407	0.126	2.315	0.407331
ADSSL1/ADSS1	0	6	1.69748e-07	0	Inf	0.992177	6	22	1.84005	0.735	4.607	0.19288	6	27	1.48911	0.607	3.655	0.384828
AMFR	0	1	3.44857e-07	0	Inf	0.996999	1	5	1.47864	0.167	13.068	0.724989	1	6	1.32988	0.155	11.408	0.794876
ANKK1	3	11	1.96856	0.539	7.192	0.305575	1	0	0	0	Inf	0.996133	4	11	2.57734	0.805	8.256	0.110963
ANKRD53	0	1	1.17266e-07	0	Inf	0.996781	0	3	0	0	Inf	0.99449	0	4	0	0	Inf	0.993604
ARHGEF10L	0	3	1.48832e-07	0	Inf	0.994438	3	9	2.43134	0.634	9.327	0.195269	3	12	1.75034	0.481	6.368	0.395555
ARL14EP	0	0	-	-	-	-	0	0	-	-	-	-	0	0	-	-	-	-
ASIP	0	0	-	-	-	-	0	1	0	0	Inf	0.996781	0	1	0	0	Inf	0.996781
ATP2A1	1	13	0.552529	0.071	4.289	0.570472	5	54	0.736353	0.29	1.868	0.519259	6	67	0.696891	0.298	1.627	0.403845
ATP2C1	0	1	1.17266e-07	0	Inf	0.996781	3	20	1.0336	0.303	3.524	0.95788	3	21	0.968419	0.285	3.287	0.958951
ATR	4	16	1.56432	0.513	4.774	0.431866	1	34	0.223857	0.03	1.648	0.14174	5	49	0.726567	0.286	1.845	0.501811
ATRIP	1	5	0.998172	0.116	8.561	0.998668	1	11	0.552922	0.071	4.325	0.572338	2	15	0.764161	0.173	3.369	0.722343
AUNIP	0	11	1.63224e-07	0	Inf	0.989204	0	1	0	0	Inf	0.996781	0	12	0	0	Inf	0.988729
BAZ1B	0	1	3.44857e-07	0	Inf	0.996999	2	7	2.2418	0.44	11.424	0.331224	2	8	2.05646	0.414	10.204	0.377682
BLM	2	14	0.981515	0.22	4.382	0.980499	0	1	0	0	Inf	0.996954	2	15	0.939474	0.212	4.168	0.934536
BLOC1S2	0	5	1.34706e-07	0	Inf	0.992804	0	1	0	0	Inf	0.996781	0	6	0	0	Inf	0.992115
BPTF	1	5	2.08086	0.228	18.952	0.515611	2	13	1.04987	0.233	4.724	0.949435	3	18	1.26467	0.365	4.377	0.710868
C2CD4A	0	0	-	-	-	-	0	0	-	-	-	-	0	0	-	-	-	-
C4orf48	0	1	1.17266e-07	0	Inf	0.996781	0	0	-	-	-	-	0	1	0	0	Inf	0.996781
C6orf211/ARMT1	1	6	1.21191	0.143	10.306	0.860305	0	3	0	0	Inf	0.994521	1	9	0.833496	0.104	6.699	0.864001
C6orf57/SDHAF4	0	2	1.69923e-07	0	Inf	0.995484	1	15	0.511858	0.067	3.937	0.519966	1	17	0.446541	0.059	3.402	0.436445
CCDC11/CFAP53	0	2	1.59496e-07	0	Inf	0.995536	1	0	0	0	Inf	0.996133	1	2	3.06955	0.275	34.221	0.361976
CCDC66	16	127	0.947551	0.557	1.613	0.842689	0	8	0	0	Inf	0.990874	16	135	0.897847	0.528	1.526	0.690403
CCDC7	0	4	1.44586e-07	0	Inf	0.993552	1	2	2.49817	0.226	27.599	0.455061	1	6	0.927719	0.11	7.798	0.944931
CDK11A	7	22	2.04534	0.863	4.85	0.104309	0	0	-	-	-	-	7	22	2.04534	0.863	4.85	0.104309
CDS1	0	3	1.1718e-07	0	Inf	0.994425	0	1	0	0	Inf	0.996844	0	4	0	0	Inf	0.993581
CEACAM1	0	1	1.17266e-07	0	Inf	0.996781	0	1	0	0	Inf	0.996781	0	2	0	0	Inf	0.995448
CEP104	1	7	0.865799	0.104	7.213	0.894017	4	13	2.47685	0.782	7.842	0.122981	5	20	1.82883	0.669	4.996	0.239077
CEP55	1	10	0.725788	0.091	5.766	0.761823	0	4	0	0	Inf	0.993673	1	14	0.526193	0.068	4.051	0.537516
CIDEB	2	16	0.739839	0.169	3.245	0.689547	0	1	0	0	Inf	0.996781	2	17	0.689081	0.158	3.006	0.620237
CLCN2	2	10	1.61813	0.346	7.571	0.540988	10	78	0.887038	0.454	1.732	0.725521	12	88	0.961169	0.52	1.776	0.89943
CLEC10A	0	11	1.29376e-07	0	Inf	0.989322	0	0	-	-	-	-	0	11	0	0	Inf	0.989322
CLINT1	0	1	1	0	Inf	1	1	5	1.93432	0.2	18.748	0.569146	1	6	1.93432	0.2	18.748	0.569146
CLUH	0	3	3.13772e-07	0	Inf	0.994281	3	45	0.460623	0.142	1.497	0.197266	3	48	0.442092	0.136	1.434	0.173916
COL5A2	0	0	-	-	-	-	4	40	0.737606	0.261	2.088	0.566546	4	40	0.737606	0.261	2.088	0.566546
CTBP1	0	1	1.17266e-07	0	Inf	0.996781	0	6	0	0	Inf	0.992219	0	7	0	0	Inf	0.991557
DARS2	1	5	1.55655	0.174	13.901	0.692042	0	19	0	0	Inf	0.985971	1	24	0.262338	0.035	1.953	0.191392
DGAT2	0	14	2.61873e-07	0	Inf	0.987998	0	3	0	0	Inf	0.994169	0	17	0	0	Inf	0.986631
DHFRL1/DHFR2	0	0	-	-	-	-	0	0	-	-	-	-	0	0	-	-	-	-
DKKL1	0	1	2.76389e-07	0	Inf	0.996954	0	1	0	0	Inf	0.996954	0	2	0	0	Inf	0.995693
DLX6	0	0	-	-	-	-	0	5	0	0	Inf	0.992891	0	5	0	0	Inf	0.992891
DNAH8	2	45	0.299583	0.072	1.245	0.0973139	10	71	1.02569	0.522	2.016	0.941351	12	114	0.74741	0.408	1.37	0.346489
DNAJC11	0	0	-	-	-	-	0	5	0	0	Inf	0.992804	0	5	0	0	Inf	0.992804
DUOX2	2	97	0.150944	0.037	0.616	0.00839534	17	105	1.19864	0.707	2.031	0.500757	19	200	0.697419	0.431	1.129	0.142864
DYNC2H1	2	16	0.722403	0.165	3.166	0.666245	14	149	0.638159	0.365	1.114	0.114307	16	164	0.651631	0.386	1.099	0.108466
E4F1	0	2	1.69923e-07	0	Inf	0.995484	1	1	5.84539	0.362	94.516	0.213709	1	3	2.16178	0.22	21.283	0.508807
EAF2	0	3	1.1718e-07	0	Inf	0.994425	1	1	13.2208	0.82	213.264	0.0687996	1	4	1.71823	0.185	15.916	0.633648
EEFSEC	0	4	2.21405e-07	0	Inf	0.993717	3	15	1.15042	0.33	4.015	0.826064	3	19	0.977596	0.286	3.342	0.971182
EFCAB5	1	31	0.289406	0.039	2.141	0.224653	2	6	2.61645	0.514	13.328	0.246898	3	37	0.710027	0.216	2.333	0.572642
EGFR	0	0	-	-	-	-	5	26	1.26194	0.477	3.34	0.639458	5	26	1.26194	0.477	3.34	0.639458
EHHADH	0	3	4.86832e-07	0	Inf	0.994027	2	20	0.798037	0.182	3.507	0.765164	2	23	0.739714	0.169	3.232	0.688639
ENO3	1	8	1.01013	0.124	8.259	0.9925	2	23	0.768808	0.178	3.327	0.725008	3	31	0.835181	0.251	2.778	0.768996
EPHA10	1	10	0.55659	0.071	4.371	0.577385	4	18	1.60358	0.533	4.828	0.401046	5	28	1.17133	0.447	3.07	0.747716
EPS8L2	1	3	2.16178	0.22	21.283	0.508807	4	30	1.06799	0.367	3.108	0.903928	5	33	1.18924	0.454	3.118	0.724525
ERCC4	0	4	1.69835e-07	0	Inf	0.993613	2	26	0.573587	0.134	2.453	0.453479	2	30	0.492275	0.116	2.087	0.336144
ERCC6	2	11	1.39785	0.297	6.575	0.671578	2	23	0.585358	0.136	2.515	0.471495	4	34	0.825065	0.288	2.361	0.720023
FAM83B	0	1	1.17266e-07	0	Inf	0.996781	1	12	0.582528	0.074	4.562	0.606819	1	13	0.522148	0.067	4.055	0.534354
FANCA	2	12	1.13112	0.249	5.13	0.873102	25	174	1.02337	0.664	1.576	0.916488	27	186	1.03102	0.68	1.563	0.88561
FANCD2OS	0	2	1.35893e-07	0	Inf	0.99548	1	30	0.269681	0.036	2	0.199811	1	32	0.246516	0.033	1.822	0.170012
FARP2	4	13	1.81982	0.582	5.694	0.303597	2	40	0.321172	0.077	1.338	0.118765	6	52	0.709237	0.302	1.665	0.430238
FBXO11	0	1	1.17266e-07	0	Inf	0.996781	0	13	0	0	Inf	0.9882	0	14	0	0	Inf	0.987759
FGFR3	0	1	1.17266e-07	0	Inf	0.996781	5	44	0.88666	0.346	2.271	0.802042	5	45	0.85683	0.335	2.191	0.74703
FHL3	1	1	7.67912	0.45	131.186	0.159201	7	37	1.34353	0.59	3.059	0.481717	8	38	1.50245	0.69	3.27	0.304898
FIGNL1	0	1	1.17266e-07	0	Inf	0.996781	1	30	0.20977	0.028	1.545	0.125322	1	31	0.201266	0.027	1.481	0.115397
FOXM1	1	0	0	0	Inf	0.996133	2	19	0.925581	0.211	4.064	0.918406	3	19	1.3635	0.393	4.729	0.625128
FRMPD1	0	3	1.66465e-07	0	Inf	0.99449	0	13	0	0	Inf	0.988525	0	16	0	0	Inf	0.987268
GINS4	0	1	1.17266e-07	0	Inf	0.996781	1	10	0.701594	0.088	5.577	0.737585	1	11	0.616297	0.078	4.846	0.645498
GNE	0	4	2.30924e-07	0	Inf	0.993383	5	40	1.01101	0.393	2.603	0.981891	5	44	0.924474	0.361	2.369	0.870067
GOLGA8B	0	0	-	-	-	-	0	0	-	-	-	-	0	0	-	-	-	-
GRM3	0	1	2.76389e-07	0	Inf	0.996954	2	23	0.614151	0.143	2.636	0.511925	2	24	0.59773	0.14	2.559	0.487978
GRM6	1	12	0.731706	0.093	5.751	0.766507	7	61	0.951519	0.428	2.115	0.902945	8	73	0.916248	0.435	1.93	0.818031
GSG2/HASPIN	0	0	-	-	-	-	0	0	-	-	-	-	0	0	-	-	-	-
GZMB	0	2	2.76179e-07	0	Inf	0.995693	0	9	0	0	Inf	0.99064	0	11	0	0	Inf	0.989697
HCAR1	1	2	3.41311	0.291	39.996	0.328256	0	6	0	0	Inf	0.992149	1	8	0.847122	0.104	6.909	0.876868
HIST1H4E/H4C5	1	6	1.02837	0.122	8.704	0.97952	1	5	1.28871	0.147	11.31	0.81896	2	11	1.14441	0.25	5.248	0.862178
HLA-DRB5	4	22	1.28994	0.434	3.83	0.646555	0	0	-	-	-	-	4	22	1.28994	0.434	3.83	0.646555
HTN1	0	1	2.76389e-07	0	Inf	0.996954	0	0	-	-	-	-	0	1	0	0	Inf	0.996954
INPP5D	1	4	1.24817	0.139	11.189	0.842965	1	15	0.48455	0.063	3.714	0.485644	2	19	0.694209	0.16	3.015	0.626169
IQGAP2	0	8	1.57602e-07	0	Inf	0.990984	6	26	1.54333	0.626	3.806	0.346133	6	34	1.17316	0.487	2.828	0.722016
IRAK4	1	13	0.633867	0.081	4.936	0.663283	2	28	0.582725	0.136	2.491	0.466274	3	41	0.598256	0.183	1.961	0.396268
ITGA10	3	13	1.61416	0.447	5.825	0.464642	19	148	0.979682	0.6	1.599	0.934547	22	161	1.03586	0.655	1.638	0.880166
KIF18A	0	4	1.64618e-07	0	Inf	0.99365	2	10	1.40347	0.302	6.53	0.665681	2	14	0.995396	0.223	4.44	0.995173
KIF4B	1	5	3.61077	0.316	41.199	0.301294	0	2	0	0	Inf	0.995472	1	7	1.84596	0.2	17.055	0.588948
KRT36	4	32	0.901126	0.313	2.596	0.847064	0	2	0	0	Inf	0.995579	4	34	0.886217	0.308	2.548	0.822616
KRT40	2	3	4.97663	0.783	31.628	0.0889823	2	16	0.802633	0.182	3.538	0.771446	4	19	1.39217	0.466	4.162	0.553724
LDHD	0	2	6.82752e-07	0	Inf	0.9955	3	18	1.18244	0.341	4.101	0.791694	3	20	1.14064	0.331	3.935	0.835006
LIPC	1	6	1.54408	0.182	13.103	0.690499	11	57	1.27095	0.659	2.451	0.474317	12	63	1.29171	0.689	2.422	0.424971
LRIG3	0	4	2.89001e-07	0	Inf	0.993517	1	17	0.347189	0.046	2.626	0.305525	1	21	0.307024	0.041	2.303	0.250773
MAGI1	1	1	5.84539	0.362	94.516	0.213709	3	15	1.55371	0.438	5.513	0.495264	4	16	1.89784	0.618	5.827	0.262922
MAK	0	2	1.17223e-07	0	Inf	0.995448	1	8	1.04065	0.125	8.662	0.970598	1	10	0.739461	0.092	5.933	0.776339
MAP1S	0	1	1.17266e-07	0	Inf	0.996781	0	2	0	0	Inf	0.995448	0	3	0	0	Inf	0.994425
MAPT	2	3	5.72562	0.91	36.02	0.0629428	1	26	0.269977	0.036	2.01	0.201076	3	29	0.750778	0.225	2.503	0.640794
MARCO	2	4	2.82895	0.509	15.712	0.234537	4	17	1.39615	0.465	4.195	0.552169	6	21	1.68096	0.671	4.21	0.267532
MCM5	0	2	1.69923e-07	0	Inf	0.995484	4	19	1.43166	0.48	4.27	0.51981	4	21	1.29827	0.44	3.834	0.636619
METTL2A	0	2	1.17223e-07	0	Inf	0.995448	0	0	-	-	-	-	0	2	0	0	Inf	0.995448
MICAL1	7	21	2.09698	0.872	5.041	0.0979612	2	14	1.14263	0.25	5.214	0.863326	9	34	1.82242	0.854	3.888	0.120628
MMP27	0	3	2.54473e-07	0	Inf	0.994634	0	4	0	0	Inf	0.993552	0	7	0	0	Inf	0.991545
MST1L	3	24	1.0594	0.309	3.627	0.926781	0	0	-	-	-	-	3	24	1.0594	0.309	3.627	0.926781
MYH7B	8	45	1.29464	0.6	2.792	0.510212	6	73	0.530466	0.229	1.229	0.139098	14	118	0.80029	0.455	1.407	0.43887
NADSYN1	0	8	1.42015e-07	0	Inf	0.990891	4	33	0.821156	0.286	2.356	0.714102	4	41	0.641187	0.227	1.813	0.402004
NEK1	0	11	1.69064e-07	0	Inf	0.989435	3	24	0.848636	0.253	2.849	0.790567	3	35	0.586089	0.179	1.922	0.377958
NIPBL	2	6	1.66606	0.335	8.276	0.532526	4	52	0.529755	0.19	1.479	0.225217	6	58	0.683432	0.292	1.6	0.380475
NLRP12	3	10	3.47754	0.872	13.874	0.077501	4	20	1.47687	0.497	4.392	0.48315	7	30	1.97034	0.844	4.598	0.11671
NR3C2	0	0	-	-	-	-	1	0	0	0	Inf	0.996068	1	0	0	0	Inf	0.996068
NUDT1	0	1	1.17266e-07	0	Inf	0.996781	2	3	5.50602	0.881	34.409	0.0680735	2	4	3.72613	0.657	21.117	0.137232
OPRM1	0	4	2.7576e-07	0	Inf	0.993908	1	13	0.476876	0.062	3.679	0.477497	1	17	0.407933	0.054	3.096	0.385882
OR4F17	0	0	-	-	-	-	0	0	-	-	-	-	0	0	-	-	-	-
OTOP1	3	13	1.77915	0.495	6.388	0.377059	0	0	-	-	-	-	3	13	1.77915	0.495	6.388	0.377059
PAK6	0	1	1.17266e-07	0	Inf	0.996781	2	8	1.58597	0.33	7.631	0.565042	2	9	1.37286	0.291	6.471	0.688701
PBXIP1	0	3	3.53544e-07	0	Inf	0.994401	1	1	7.67912	0.45	131.186	0.159201	1	4	2.674	0.269	26.544	0.400958
PCBP4	0	1	1.17266e-07	0	Inf	0.996781	0	3	0	0	Inf	0.994745	0	4	0	0	Inf	0.993717
PCK2	15	87	1.28213	0.73	2.253	0.387492	3	32	0.763679	0.23	2.532	0.659278	18	119	1.15016	0.691	1.915	0.590619
PDCD11	0	3	1.96183e-07	0	Inf	0.994521	1	19	0.42739	0.056	3.251	0.41159	1	22	0.368372	0.049	2.775	0.33236
PDS5B	0	1	1.17266e-07	0	Inf	0.996781	1	15	0.475762	0.062	3.657	0.475334	1	16	0.434638	0.057	3.323	0.422031
PHF2	0	0	-	-	-	-	3	8	3.40653	0.853	13.597	0.0826341	3	8	3.40653	0.853	13.597	0.0826341
PHRF1	0	3	1.55969e-07	0	Inf	0.994422	2	5	2.91111	0.543	15.618	0.212513	2	8	1.74497	0.36	8.452	0.489163
PIK3CG	0	2	1.69923e-07	0	Inf	0.995484	2	11	1.19359	0.261	5.465	0.819653	2	13	1.01881	0.227	4.576	0.980607
PINX1	0	2	1.17223e-07	0	Inf	0.995448	1	14	0.579646	0.075	4.479	0.601182	1	16	0.472034	0.062	3.607	0.469362
PLD2	5	22	1.82361	0.673	4.942	0.237578	1	17	0.392964	0.052	2.981	0.366279	6	39	1.13897	0.475	2.731	0.770584
POLR3A	1	9	1.07869	0.129	9.026	0.944287	8	83	0.693076	0.331	1.45	0.330294	9	91	0.72616	0.361	1.459	0.368914
PRKCG	0	0	-	-	-	-	0	4	0	0	Inf	0.993787	0	4	0	0	Inf	0.993787
PRMT9	0	5	1.85915e-07	0	Inf	0.992922	1	10	0.585935	0.074	4.639	0.612589	1	15	0.422165	0.055	3.23	0.406185
PRRC2C	1	3	2.76098	0.249	30.676	0.408429	1	5	1.24817	0.139	11.189	0.842965	2	8	1.7272	0.347	8.589	0.504267
PTCH1	0	0	-	-	-	-	5	50	0.786259	0.309	2	0.613723	5	50	0.786259	0.309	2	0.613723
PTK2B	0	1	3.44857e-07	0	Inf	0.996999	3	19	1.22098	0.35	4.253	0.753872	3	20	1.1843	0.342	4.106	0.789716
PTPRN	0	1	3.44857e-07	0	Inf	0.996999	0	11	0	0	Inf	0.98934	0	12	0	0	Inf	0.988868
PYROXD1	0	6	5.06024e-07	0	Inf	0.991933	1	7	1.5254	0.178	13.084	0.700176	1	13	0.994023	0.123	8.039	0.995515
RAD1	2	12	1.49333	0.315	7.078	0.613481	0	2	0	0	Inf	0.99516	2	14	1.30363	0.28	6.072	0.735541
RASA2	0	4	2.31406e-07	0	Inf	0.99372	1	6	1.09908	0.129	9.333	0.931019	1	10	0.744048	0.093	5.929	0.780092
RASEF	1	7	1.04694	0.123	8.891	0.966476	0	12	0	0	Inf	0.988922	1	19	0.366689	0.049	2.772	0.331012
RGS22	0	9	1.38896e-07	0	Inf	0.990185	0	8	0	0	Inf	0.990893	0	17	0	0	Inf	0.986609
RIC1	1	10	0.546774	0.07	4.297	0.566018	5	27	1.4563	0.546	3.884	0.452653	6	37	1.14451	0.475	2.76	0.763802
RNF181	0	4	2.89001e-07	0	Inf	0.993517	0	4	0	0	Inf	0.993591	0	8	0	0	Inf	0.990851
SCN7A	2	5	2.58896	0.491	13.644	0.261959	7	46	1.31969	0.581	2.996	0.507325	9	51	1.48231	0.713	3.082	0.291943
SEC23B	2	6	3.32045	0.587	18.797	0.174837	4	42	0.719413	0.254	2.036	0.535046	6	48	0.973972	0.409	2.317	0.952441
SERPINB10	0	0	-	-	-	-	0	5	0	0	Inf	0.99286	0	5	0	0	Inf	0.99286
SERPINF1	0	2	1.69923e-07	0	Inf	0.995484	1	19	0.442136	0.058	3.372	0.431064	1	21	0.392408	0.052	2.969	0.364975
SGSM3	0	1	1.59776e-07	0	Inf	0.996844	2	25	0.533499	0.125	2.278	0.39632	2	26	0.512986	0.12	2.185	0.366603
SH2D6	1	1	4.99817	0.312	80.03	0.25547	0	2	0	0	Inf	0.995484	1	3	1.99194	0.202	19.618	0.554866
SIRT3	2	17	1.01325	0.226	4.546	0.986282	2	24	0.670141	0.155	2.895	0.591832	2	25	0.628523	0.146	2.705	0.532867
SLC10A6	0	2	3.4449e-07	0	Inf	0.995756	0	2	0	0	Inf	0.995472	0	4	0	0	Inf	0.993724
SLC22A13	1	12	1.03942	0.129	8.38	0.97104	1	10	0.855689	0.107	6.812	0.882941	2	22	0.938961	0.215	4.094	0.933196
SLC22A5	0	4	3.04519e-07	0	Inf	0.993523	4	29	1.06068	0.366	3.073	0.913558	4	33	0.968054	0.337	2.784	0.951966
SLC2A8	1	16	0.495161	0.064	3.829	0.500657	5	33	0.967953	0.374	2.505	0.946464	6	49	0.834341	0.353	1.972	0.679808
SLC4A7	0	5	1.17094e-07	0	Inf	0.992802	3	20	0	0.296	3.421	0.992884	3	25	0.756262	0.226	2.526	0.649765
SLC4A8	0	1	1.17266e-07	0	Inf	0.996781	2	14	0.935999	0.209	4.185	0.931024	2	15	0.856818	0.193	3.801	0.838914
SLC4A9	0	12	1.76287e-07	0	Inf	0.988759	9	39	1.49768	0.715	3.139	0.284629	9	51	1.16336	0.565	2.395	0.681366
SLX4	1	7	0.954664	0.115	7.934	0.965746	0	5	0	0	Inf	0.992804	1	12	0.518026	0.067	4.029	0.529721
SMARCAL1	2	7	1.61458	0.331	7.867	0.553211	9	61	0	0.489	2.027	0.991462	11	68	1.07053	0.56	2.046	0.836558
SPATA21	1	4	2.2156	0.24	20.48	0.483241	1	2	2.76098	0.249	30.676	0.408429	2	6	2.44708	0.481	12.438	0.280678
SUPT3H	1	5	1.26083	0.144	11.018	0.834017	1	5	1.04671	0.122	8.99	0.966813	2	10	1.14489	0.248	5.275	0.862191
SUPT6H	0	0	-	-	-	-	0	32	1.94461e-07	0	Inf	0.981847	0	32	0	0	Inf	0.981847
TAB1	0	2	2.99266e-07	0	Inf	0.99516	0	5	0	0	Inf	0.992896	0	7		0	Inf	0.991418
TARDBP	0	0	-	-	-	-	1	1	4.99817	0.312	80.03	0.25547	1	1	4.99817	0.312	80.03	0.25547
TCF7	1	0	0	0	Inf	0.996133	1	16	0.405976	0.053	3.095	0.384405	2	16	0.806623	0.183	3.56	0.776626
TCF7L2	0	0	-	-	-	-	2	14	1.22206	0.268	5.572	0.795597	2	14	1.22206	0.268	5.572	0.795597
TIAM2	2	4	2.50092	0.457	13.688	0.29055	2	24	0.507166	0.119	2.163	0.358984	4	28	0.840041	0.292	2.416	0.746411
TNC	0	6	1.5238e-07	0	Inf	0.991925	4	33	0.956237	0.333	2.748	0.933779	4	39	0.774378	0.272	2.201	0.631438
TNK1	1	18	0.725471	0.092	5.712	0.760497	1	6	1.13352	0.134	9.592	0.908427	2	24	0.883336	0.201	3.876	0.869421
TP53TG5	1	4	1.56721	0.171	14.348	0.69086	0	0	-	-	-	-	1	4	1.56721	0.171	14.348	0.69086
TRIM42	0	5	2.30604e-07	0	Inf	0.993011	1	6	1.02837	0.122	8.704	0.97952	1	11	0.660094	0.084	5.2	0.693267
TRIM63	2	16	0.813869	0.184	3.592	0.785725	0	5	0	0	Inf	0.992804	2	21	0.598266	0.139	2.579	0.490708
TRIO	2	14	0.740789	0.168	3.275	0.692344	8	42	1.37621	0.637	2.973	0.416538	10	56	1.17956	0.595	2.339	0.636267
TRPM1	1	5	1.36507	0.156	11.972	0.778775	6	43	1.4675	0.605	3.559	0.396161	7	48	1.45305	0.639	3.303	0.372474
TRPM4	11	77	0.980582	0.515	1.866	0.952359	2	26	0.575651	0.134	2.466	0.456832	13	102	0.895601	0.497	1.614	0.713585
TSEN2	0	2	1.69923e-07	0	Inf	0.995484	0	4	0	0	Inf	0.993613	0	6	0	0	Inf	0.992177
TTC6	11	86	1.02381	0.539	1.943	0.942643	0	6	0	0	Inf	0.991984	11	91	0.966777	0.51	1.831	0.917424
TXLNA	0	0	-	-	-	-	0	8	0	0	Inf	0.990603	0	8	0	0	Inf	0.990603
UBE2U	0	11	1.39894e-07	0	Inf	0.989321	0	2	0	0	Inf	0.995448	0	13	0	0	Inf	0.988387
USP5	0	1	2.76389e-07	0	Inf	0.996954	0	9	0	0	Inf	0.990082	0	10	0	0	Inf	0.989603
UVSSA	4	10	2.73718	0.828	9.047	0.0987804	0	13	0	0	Inf	0.988295	4	23	1.3197	0.445	3.914	0.61702
WRNIP1	0	0	-	-	-	-	2	20	0.659879	0.153	2.853	0.577908	2	20	0.659879	0.153	2.853	0.577908
XDH	2	18	0.832316	0.189	3.656	0.807947	5	46	0.883718	0.345	2.266	0.796975	7	64	0.867827	0.391	1.924	0.727064
ZBTB39	0	0	-	-	-	-	0	5	0	0	Inf	0.993129	0	5	0	0	Inf	0.993129
ZWINT	1	2	3.22764	0.281	37.055	0.346716	0	1	0	0	Inf	0.996954	1	3	2.44214	0.244	24.435	0.447351

## Sheet: Table 10B
Associations with ER-positive breast cancer risk of loss of function and rare missense variants in 178 genes idendified at the discovery stage (2764 cases, 6019 controls)
Gene	Loss of function variants carriers		OR	95 %CI		p-value	Rare missense variants carriers		OR	95 %CI		p-value	Combined Loss of function and Rare missenses variants carriers		OR	95 %CI		p-value
	Cases	Controls					Cases	Controls					Cases	Controls
ABCG2	5	9	1.3	0.419	4.031	0.649528	4	17	0.4343	0.146	1.295	0.135	9	26	0.692584	0.32	1.49	0.348
ADAM29	0	0	-	-	-	-	2	0	0	0	Inf	0.992	2	0	0	0	Inf	0.991948
ADAMTS12	5	9	1.27	0.403	4.015	0.680911	36	61	1.26243	0.826	1.93	0.282	41	70	1.26449	0.85	1.88	0.24883
ADRA1A	2	11	0.32	0.072	1.463	0.142901	9	11	1.52296	0.627	3.696	0.352	11	22	0.911988	0.44	1.89	0.803885
ADSSL1/ADSS1	2	6	0.61	0.123	3.02	0.543529	18	22	1.57087	0.837	2.947	0.159	20	27	1.40964	0.79	2.53	0.248779
AMFR	2	1	5.17	0.44	60.78	0.191418	2	5	0.790737	0.151	4.138	0.781	4	6	1.41173	0.39	5.11	0.599377
ANKK1	8	11	1.38	0.554	3.462	0.48649	0	0	-	-	-	-	8	11	1.38453	0.55	3.46	0.48649
ANKRD53	3	1	5.24	0.544	50.394	0.151723	0	3	0	0	Inf	0.991	3	4	1.34316	0.3	6.01	0.699527
ARHGEF10L	1	3	0.59	0.061	5.678	0.648001	7	9	1.68759	0.607	4.69	0.316	8	12	1.37487	0.55	3.44	0.495879
ARL14EP	0	0	-	-	-	-	1	0	0	0	Inf	0.994	1	0	0	0	Inf	0.994285
ASIP	0	0	-	-	-	-	1	1	1.8551	0.116	29.73	0.662	1	1	1.8551	0.12	29.73	0.662425
ATP2A1	12	13	1.9	0.854	4.219	0.115502	30	54	1.24169	0.782	1.972	0.359	42	67	1.38127	0.93	2.06	0.113451
ATP2C1	0	1	0	0	Inf	0.994676	6	20	0.612247	0.244	1.537	0.296	6	21	0.578958	0.23	1.45	0.241634
ATR	10	16	1.25	0.559	2.812	0.582443	14	34	0.892462	0.473	1.683	0.725	24	49	1.037	0.63	1.71	0.886601
ATRIP	5	5	1.78	0.514	6.152	0.36294	5	11	0.850193	0.294	2.461	0.765	10	15	1.22896	0.55	2.75	0.615455
AUNIP	4	11	0.79	0.246	2.56	0.699412	1	1	1.74362	0.109	27.896	0.694	5	12	0.889124	0.31	2.59	0.82913
BAZ1B	0	1	0	0	Inf	0.995014	3	7	0.908224	0.227	3.636	0.892	3	8	0.842192	0.22	3.29	0.804789
BLM	10	14	1.38	0.606	3.118	0.445892	2	1	3.56465	0.323	39.343	0.3	12	15	1.52986	0.71	3.29	0.276533
BLOC1S2	0	5	0	0	Inf	0.988103	0	1	0	0	Inf	0.995	0	6	1.12382e-07	0	Inf	0.986966
BPTF	2	5	1.27	0.226	7.181	0.784668	9	13	1.36383	0.578	3.216	0.478	11	18	1.34583	0.62	2.9	0.448838
C2CD4A	0	0	-	-	-	-	0	0	-	-	-	-	0	0	-	-	-	-
C4orf48	1	1	1.74	0.109	27.896	0.694299	0	0	-	-	-	-	1	1	1.74362	0.11	27.9	0.694299
C6orf211/ARMT1	2	6	0.66	0.132	3.32	0.616616	2	3	1.2238	0.204	7.336	0.825	4	9	0.858286	0.26	2.81	0.800421
C6orf57/SDHAF4	0	2	0	0	Inf	0.992485	2	15	0.326232	0.073	1.449	0.141	2	17	0.276791	0.06	1.21	0.0884924
CCDC11/CFAP53	0	2	0	0	Inf	0.992528	0	0	-	-	-	-	0	2	0	0	Inf	0.992528
CCDC66	48	127	0.84	0.595	1.178	0.306556	3	8	0.901723	0.229	3.549	0.882	51	135	0.839994	0.6	1.17	0.303256
CCDC7	3	4	1.49	0.327	6.793	0.606626	0	2	0	0	Inf	0.992	3	6	0.956418	0.24	3.87	0.950195
CDK11A	5	22	0.42	0.159	1.114	0.0812578	0	0	-	-	-	-	5	22	0.420572	0.16	1.11	0.0812578
CDS1	0	3	0	0	Inf	0.990779	1	1	3.0878	0.18	53.018	0.437	1	4	0.522875	0.06	4.77	0.565346
CEACAM1	3	1	5.32	0.553	51.193	0.147835	1	1	1.74362	0.109	27.896	0.694	4	2	3.52908	0.65	19.29	0.145587
CEP104	8	7	2.41	0.837	6.968	0.103125	5	13	0.88096	0.307	2.531	0.814	13	20	1.43308	0.7	2.95	0.327975
CEP55	4	10	0.85	0.262	2.753	0.786305	0	4	0	0	Inf	0.989	4	14	0.584394	0.19	1.79	0.347536
CIDEB	4	16	0.47	0.155	1.398	0.173026	4	1	9.19831	0.99	85.47	0.051	8	17	0.902713	0.39	2.11	0.812688
CLCN2	0	10	0	0	Inf	0.983116	30	78	0.781688	0.509	1.2	0.26	30	88	0.702857	0.46	1.07	0.101487
CLEC10A	4	11	0.67	0.213	2.125	0.499442	0	0	-	-	-	-	4	11	0.672767	0.21	2.13	0.499442
CLINT1	0	1	1	0	Inf	1	2	5	1.42916	0.232	8.808	0.7	2	6	1.42916	0.23	8.81	0.700347
CLUH	1	3	1.17	0.101	13.646	0.898731	16	45	0.773282	0.432	1.384	0.386	17	48	0.78932	0.45	1.39	0.412703
COL5A2	1	0	0	0	Inf	0.994307	16	40	0.824747	0.457	1.489	0.523	17	40	0.875538	0.49	1.56	0.65251
CTBP1	3	1	5.24	0.544	50.394	0.151723	0	6		0	Inf	0.987	3	7	0.831507	0.21	3.25	0.790605
DARS2	5	5	2.38	0.667	8.509	0.181397	6	19	0.63023	0.249	1.593	0.329	11	24	0.95674	0.46	1.98	0.904847
DGAT2	5	14	1.01	0.348	2.931	0.985659	3	3	2.65105	0.443	15.88	0.286	8	17	1.29701	0.53	3.15	0.565517
DHFRL1/DHFR2	0	0	-	-	-	-	0	0	-	-	-	-	0	0	-	-	-	-
DKKL1	0	1	0	0	Inf	0.994697	1	1	1.86017	0.116	29.784	0.661	1	2	0.929379	0.08	10.27	0.95235
DLX6	0	0	-	-	-	-	2	5	0.806319	0.154	4.218	0.799	2	5	0.806319	0.15	4.22	0.798712
DNAH8	12	45	0.56	0.293	1.071	0.0795142	42	71	1.31709	0.888	1.954	0.171	54	114	1.03701	0.74	1.45	0.831537
DNAJC11	0	0	-	-	-	-	3	5	1.05435	0.252	4.417	0.942	3	5	1.05435	0.25	4.42	0.94227
DUOX2	26	97	0.59	0.377	0.915	0.0185875	45	105	0.963997	0.671	1.385	0.843	71	200	0.787253	0.59	1.04	0.0953682
DYNC2H1	14	16	1.6	0.778	3.292	0.20178	72	149	0.994939	0.745	1.329	0.973	85	164	1.0562	0.81	1.38	0.691682
E4F1	1	2	0.89	0.081	9.826	0.924423	3	1	5.40496	0.561	52.034	0.144	4	3	2.39011	0.53	10.69	0.25432
EAF2	0	3	0	0	Inf	0.990779	0	1	0	0	Inf	0.995	0	4	0	0	Inf	0.989242
EEFSEC	2	4	1.06	0.191	5.913	0.94508	6	15	0.770698	0.297	2	0.592	8	19	0.828418	0.36	1.91	0.6579
EFCAB5	15	31	1.07	0.567	2.001	0.84355	4	6	1.44005	0.398	5.21	0.578	19	37	1.12795	0.64	1.99	0.676498
EGFR	0	0	-	-	-	-	9	26	0.735356	0.339	1.593	0.436	9	26	0.735356	0.34	1.59	0.435722
EHHADH	1	3	1.8	0.113	28.812	0.67763	8	20	0.966993	0.411	2.274	0.939	9	23	1.01892	0.45	2.3	0.963998
ENO3	5	8	1.29	0.417	4.012	0.655466	11	23	1.11054	0.53	2.329	0.781	16	31	1.16232	0.63	2.16	0.634422
EPHA10	5	10	0.91	0.311	2.672	0.865678	5	18	0.567204	0.209	1.542	0.266	10	28	0.697633	0.34	1.45	0.332348
EPS8L2	5	3	3	0.717	12.58	0.132462	15	30	1.1472	0.601	2.188	0.677	20	33	1.356	0.76	2.42	0.302532
ERCC4	2	4	0.89	0.163	4.865	0.893253	9	26	0.744554	0.344	1.613	0.454	11	30	0.76684	0.38	1.55	0.459402
ERCC6	5	11	0.99	0.331	2.959	0.986115	10	23	0.925389	0.434	1.972	0.841	15	34	0.945629	0.51	1.76	0.860358
FAM83B	0	1	0	0	Inf	0.994676	5	12	0.817058	0.284	2.355	0.708	5	13	0.747395	0.26	2.12	0.58486
FANCA	2	12	0.33	0.074	1.507	0.153943	76	174	0.928891	0.703	1.228	0.604	78	186	0.886896	0.68	1.17	0.389699
FANCD2OS	1	2	0.93	0.084	10.243	0.951007	10	30	0.695079	0.335	1.442	0.328	11	32	0.711223	0.35	1.43	0.338539
FARP2	7	13	1.04	0.408	2.639	0.93863	23	40	1.14671	0.681	1.931	0.607	30	52	1.11997	0.71	1.77	0.626363
FBXO11	0	1	0	0	Inf	0.994676	4	13	0.717364	0.226	2.275	0.573	4	14	0.651334	0.21	2.04	0.461156
FGFR3	0	1	0	0	Inf	0.994676	16	44	0.80873	0.45	1.454	0.478	16	45	0.786355	0.44	1.41	0.420156
FHL3	0	1	0	0	Inf	0.994676	16	37	0.901966	0.496	1.639	0.735	16	38	0.874213	0.48	1.59	0.657795
FIGNL1	0	1	0	0	Inf	0.994676	7	30	0.424363	0.186	0.968	0.042	7	31	0.41008	0.18	0.93	0.0335317
FOXM1	0	0	-	-	-	-	5	19	0.601254	0.22	1.642	0.321	5	19	0.601254	0.22	1.64	0.321083
FRMPD1	2	3	1.21	0.201	7.229	0.837206	4	13	0.670076	0.216	2.083	0.489	6	16	0.784061	0.3	2.03	0.615371
GINS4	1	1	2.9	0.166	50.823	0.465978	4	10	0.858543	0.265	2.78	0.799	5	11	1.00812	0.34	2.95	0.98824
GNE	1	4	0.91	0.089	9.185	0.932996	20	40	1.09594	0.632	1.901	0.745	21	44	1.08442	0.64	1.85	0.766914
GOLGA8B	0	0	-	-	-	-	0	0	-	-	-	-	0	0	-	-	-	-
GRM3	0	1		0	Inf	0.994697	9	23	0.778475	0.357	1.698	0.529	9	24	0.743643	0.34	1.61	0.453825
GRM6	7	12	1.54	0.589	4.007	0.380413	36	61	1.38306	0.899	2.127	0.14	43	73	1.40916	0.95	2.09	0.0877938
GSG2/HASPIN	0	0	-	-	-	-	0	0	-	-	-	-	0	0	-	-	-	-
GZMB	1	2	0.91	0.082	10.042	0.938335	2	9	0.6923	0.143	3.356	0.648	3	11	0.749215	0.2	2.79	0.666497
HCAR1	0	2	0	0	Inf	0.992427	3	6	1.20067	0.291	4.948	0.8	3	8	0.912253	0.24	3.53	0.894209
HIST1H4E/H4C5	5	6	1.59	0.48	5.271	0.448149	3	5	1.07139	0.256	4.488	0.925	8	11	1.34772	0.54	3.37	0.52336
HLA-DRB5	18	22	1.76	0.925	3.363	0.084677	0	0	-	-	-	-	18	22	1.76398	0.93	3.36	0.084677
HTN1	0	1	0	0	Inf	0.994697	0	0	-	-	-	-	0	1	1.18683e-07	0	Inf	0.994697
INPP5D	4	4	1.76	0.439	7.041	0.424986	7	15	1.01939	0.41	2.536	0.967	11	19	1.19679	0.56	2.54	0.640222
IQGAP2	3	8	0.8	0.208	3.043	0.738598	7	26	0.513263	0.221	1.19	0.12	10	34	0.57497	0.28	1.17	0.127427
IRAK4	5	13	0.91	0.317	2.595	0.854785	12	28	1.01083	0.501	2.038	0.976	17	41	0.976972	0.55	1.75	0.93765
ITGA10	6	13	0.98	0.364	2.628	0.964256	61	148	0.87519	0.644	1.19	0.395	67	161	0.883178	0.66	1.19	0.407339
KIF18A	1	4	0.47	0.052	4.203	0.498655	2	10	0.384559	0.084	1.764	0.219	3	14	0.408858	0.12	1.43	0.161065
KIF4B	4	5	4.3	0.763	24.202	0.0982404	1	2	1.6609	0.141	19.627	0.687	5	7	3.1293	0.81	12.11	0.0984523
KRT36	15	32	1.04	0.553	1.97	0.895092	0	2	0	0	Inf	0.993	15	34	1.02458	0.54	1.93	0.939999
KRT40	3	3	1.78	0.359	8.835	0.480175	10	16	1.20119	0.539	2.678	0.654	13	19	1.29906	0.64	2.66	0.473449
LDHD	0	2	0	0	Inf	0.99173	9	18	1.19006	0.522	2.714	0.679	9	20	1.11307	0.49	2.52	0.796829
LIPC	1	6	0.31	0.037	2.591	0.280562	31	57	1.0785	0.691	1.683	0.739	32	63	1.00077	0.65	1.54	0.997212
LRIG3	0	4	0	0	Inf	0.98868	8	17	0.89843	0.385	2.094	0.804	8	21	0.758011	0.33	1.73	0.510352
MAGI1	2	1	3.8	0.343	41.994	0.276592	9	15	1.41293	0.602	3.314	0.427	11	16	1.59067	0.72	3.51	0.250553
MAK	2	2	1.74	0.245	12.394	0.57824	1	8	0.308753	0.037	2.546	0.275	3	10	0.674979	0.18	2.52	0.559178
MAP1S	0	1	0	0	Inf	0.994676	2	2	1.79872	0.253	12.789	0.557	2	3	1.19108	0.2	7.14	0.848217
MAPT	2	3	1.39	0.226	8.591	0.721441	10	26	0.815961	0.387	1.718	0.592	12	29	0.876912	0.44	1.74	0.708012
MARCO	3	4	1.32	0.295	5.904	0.716531	7	17	0.787751	0.325	1.911	0.598	10	21	0.894744	0.42	1.91	0.773679
MCM5	0	2	0	0	Inf	0.992485	10	19	1.02626	0.474	2.223	0.948	10	21	0.921969	0.43	1.97	0.833936
METTL2A	1	2	0.89	0.081	9.826	0.924423	0	0	-	-	-	-	1	2	0.890278	0.08	9.83	0.924423
MICAL1	9	21	0.88	0.397	1.963	0.760222	9	14	1.6217	0.666	3.95	0.287	18	34	1.18688	0.66	2.15	0.572019
MMP27	2	3	1.79	0.286	11.225	0.532989	2	4	1.00422	0.18	5.6	0.996	4	7	1.3034	0.37	4.57	0.678622
MST1L	7	24	0.71	0.295	1.688	0.43374	0	0	-	-	-	-	7	24	0.705969	0.3	1.69	0.43374
MYH7B	20	45	0.94	0.548	1.612	0.821287	48	73	1.33556	0.921	1.936	0.127	67	118	1.17336	0.86	1.6	0.309239
NADSYN1	8	8	1.89	0.704	5.077	0.206175	12	33	0.767628	0.39	1.51	0.444	20	41	1.00815	0.58	1.74	0.976851
NEK1	3	11	0.53	0.147	1.908	0.33087	8	24	0.665727	0.297	1.492	0.323	11	35	0.621299	0.31	1.23	0.171994
NIPBL	1	6	0.29	0.035	2.412	0.252074	16	52	0.627204	0.355	1.108	0.108	17	58	0.586852	0.34	1.02	0.0567762
NLRP12	1	10	0.26	0.032	2.137	0.211335	4	20	0.43465	0.147	1.285	0.132	5	30	0.384381	0.15	1.01	0.0512265
NR3C2	1	0	0	0	Inf	0.994285	0	0	-	-	-	-	1	0	0	0	Inf	0.994285
NUDT1	0	1	0	0	Inf	0.994676	2	3	1.23817	0.207	7.421	0.815	2	4	0.918425	0.17	5.02	0.921783
OPRM1	0	4	0	0	Inf	0.989394	8	13	1.24769	0.511	3.044	0.627	8	17	0.935518	0.4	2.19	0.877637
OR4F17	0	0	-	-	-	-	0	0	-	-	-	-	0	0	-	-	-	-
OTOP1	4	13	0.74	0.236	2.304	0.599284	1	0	0	0	Inf	0.994	5	13	0.910221	0.32	2.61	0.86081
PAK6	1	1	1.8	0.113	28.812	0.67763	6	8	1.53272	0.524	4.48	0.435	7	9	1.56545	0.58	4.26	0.379633
PBXIP1	2	3	1.83	0.257	12.993	0.546735	0	1	0	0	Inf	0.995	2	4	1.22216	0.2	7.32	0.826171
PCBP4	0	1	0	0	Inf	0.994676	2	3	1.77121	0.283	11.103	0.542	2	4	1.21616	0.22	6.88	0.824831
PCK2	50	87	1.28	0.888	1.832	0.187341	18	32	1.17565	0.652	2.119	0.59	68	119	1.24971	0.92	1.7	0.158418
PDCD11	1	3	0.6	0.062	5.77	0.658003	8	19	0.927966	0.397	2.168	0.863	9	22	0.87515	0.4	1.94	0.741854
PDS5B	0	1	0	0	Inf	0.994676	2	15	0.295247	0.067	1.31	0.108	2	16	0.27236	0.06	1.2	0.0855597
PHF2	1	0	0	0	Inf	0.994307	2	8	0.617865	0.126	3.024	0.552	3	8	0.913822	0.23	3.6	0.897398
PHRF1	2	3	1.43	0.232	8.808	0.700347	3	5	1.17577	0.277	4.995	0.826	5	8	1.2672	0.41	3.93	0.681862
PIK3CG	1	2	0.89	0.081	9.826	0.924423	10	11	1.73078	0.731	4.098	0.212	11	13	1.59666	0.71	3.58	0.256188
PINX1	1	2	0.87	0.079	9.619	0.910609	6	14	1.04055	0.392	2.764	0.936	7	16	1.01405	0.41	2.51	0.975909
PLD2	9	22	1.03	0.463	2.299	0.939067	9	17	1.04611	0.463	2.366	0.914	18	39	1.03889	0.59	1.84	0.89611
POLR3A	1	9	0.34	0.041	2.803	0.314696	36	83	0.93313	0.623	1.397	0.737	37	91	0.894173	0.6	1.33	0.57919
PRKCG	0	0	-	-	-	-	0	4		0	Inf	0.989	0	4		0	Inf	0.988826
PRMT9	2	5	0.84	0.16	4.374	0.832122	6	10	1.20681	0.429	3.396	0.722	8	15	1.08376	0.45	2.6	0.856768
PRRC2C	4	3	3.68	0.673	20.125	0.13282	3	5	1.30795	0.292	5.851	0.725	7	8	2.08668	0.7	6.22	0.186753
PTCH1	2	0	0	0	Inf	0.991388	29	50	1.3288	0.827	2.136	0.24	31	50	1.43511	0.9	2.29	0.128499
PTK2B	1	1	2.9	0.166	50.823	0.465978	8	19	1.1148	0.47	2.646	0.805	9	20	1.20227	0.53	2.74	0.661396
PTPRN	3	1	7.28	0.722	73.339	0.0922353	4	11	0.687662	0.218	2.171	0.523	7	12	1.14834	0.45	2.94	0.773243
PYROXD1	0	6	0	0	Inf	0.985928	6	7	2.29661	0.722	7.31	0.159	6	13	1.52741	0.53	4.39	0.431388
RAD1	8	12	1.96	0.741	5.195	0.175216	0	2		0	Inf	0.992	8	14	1.73371	0.67	4.48	0.255882
RASA2	2	4	1.23	0.218	6.949	0.815093	4	6	1.31073	0.366	4.699	0.678	6	10	1.28166	0.46	3.58	0.635931
RASEF	5	7	2.09	0.614	7.077	0.238553	3	12	0.495003	0.139	1.768	0.279	8	19	0.960128	0.41	2.24	0.924926
RGS22	2	9	0.44	0.093	2.065	0.296651	1	8	0.220612	0.028	1.765	0.154	3	17	0.329126	0.1	1.13	0.0776349
RIC1	3	10	0.56	0.153	2.045	0.379765	15	27	1.31198	0.679	2.533	0.419	18	37	1.07496	0.6	1.92	0.807182
RNF181	3	4	1.78	0.359	8.838	0.479503	0	4		0	Inf	0.989	3	8	0.831507	0.21	3.25	0.790605
SCN7A	6	5	2.14	0.653	7.032	0.208539	15	46	0.832038	0.453	1.527	0.553	21	51	1.00477	0.59	1.71	0.98597
SEC23B	2	6	1.17	0.207	6.654	0.857129	26	42	1.36386	0.821	2.265	0.23	28	48	1.34793	0.83	2.19	0.229373
SERPINB10	0	0	-	-	-	-	5	5	2.17689	0.615	7.705	0.228	5	5	2.17689	0.62	7.71	0.227737
SERPINF1	1	2	0.89	0.081	9.826	0.924423	8	19	1.03814	0.439	2.453	0.932	9	21	1.01981	0.45	2.29	0.962138
SGSM3	2	1	3.72	0.337	41.046	0.284063	3	25	0.253694	0.076	0.848	0.026	5	26	0.40407	0.15	1.06	0.0662546
SH2D6	0	1	0	0	Inf	0.994676	1	2	0.890278	0.081	9.826	0.924	1	3	0.59017	0.06	5.68	0.648001
SIRT3	3	17	0.48	0.135	1.684	0.250113	7	24	0.682925	0.288	1.622	0.387	8	25	0.739525	0.33	1.68	0.469758
SLC10A6	2	2	2.9	0.383	22.009	0.302422	2	2	2.26834	0.306	16.84	0.423	4	4	2.56499	0.62	10.7	0.196173
SLC22A13	3	12	0.74	0.198	2.793	0.660221	5	10	1.01464	0.343	3.001	0.979	8	22	0.890987	0.39	2.06	0.786857
SLC22A5	0	4	0	0	Inf	0.988784	19	29	1.44911	0.798	2.63	0.223	19	33	1.3132	0.73	2.36	0.360449
SLC2A8	12	16	1.9	0.857	4.229	0.113892	12	33	0.752327	0.385	1.469	0.404	24	49	1.07862	0.65	1.78	0.767487
SLC4A7	0	5	0	0	Inf	0.988095	15	20	1.44281	0.735	2.833	0.287	15	25	1.13657	0.6	2.17	0.697056
SLC4A8	0	1	0	0	Inf	0.994676	7	14	1.08907	0.433	2.742	0.856	7	15	1.00319	0.4	2.5	0.994535
SLC4A9	8	12	1.41	0.563	3.55	0.461058	18	39	0.932173	0.527	1.649	0.809	26	51	1.04258	0.64	1.69	0.866007
SLX4	4	7	1.18	0.34	4.112	0.792167	1	5	0.352005	0.041	3.015	0.341	5	12	0.808367	0.28	2.32	0.691907
SMARCAL1	3	7	0.83	0.213	3.246	0.790605	40	61	1.27472	0.85	1.913	0.241	43	68	1.22892	0.83	1.81	0.298444
SPATA21	0	4	0	0	Inf	0.989306	0	2	0	0	Inf	0.992	0	6	0	0	Inf	0.986889
SUPT3H	3	5	1.07	0.256	4.488	0.924833	1	5	0.355287	0.041	3.044	0.345	4	10	0.712505	0.22	2.28	0.567084
SUPT6H	0	0	-	-	-	-	13	32	0.91168	0.471	1.764	0.784	13	32	0.91168	0.47	1.76	0.783619
TAB1	1	2	1.8	0.113	28.812	0.67763	6	5	2.37489	0.716	7.879	0.157	7	7	2.275	0.76	6.84	0.143209
TARDBP	0	0	-	-	-	-	1	1	1.74362	0.109	27.896	0.694	1	1	1.74362	0.11	27.9	0.694299
TCF7	0	0	-	-	-	-	6	16	0.719643	0.279	1.857	0.496	6	16	0.719643	0.28	1.86	0.496467
TCF7L2	0	0	-	-	-	-	11	14	1.94558	0.846	4.474	0.117	11	14	1.94558	0.85	4.47	0.117194
TIAM2	4	4	1.77	0.443	7.096	0.418477	14	24	1.11816	0.575	2.174	0.742	18	28	1.21732	0.67	2.21	0.518714
TNC	1	6	0.35	0.041	2.983	0.335739	15	33	0.989165	0.529	1.851	0.973	16	39	0.888909	0.49	1.62	0.699128
TNK1	2	18	0.35	0.078	1.602	0.177501	3	6	0.991323	0.245	4.011	0.99	5	24	0.575558	0.21	1.57	0.280236
TP53TG5	3	4	1.76	0.381	8.142	0.468771	0	0	-	-	-	-	3	4	1.7611	0.38	8.14	0.468771
TRIM42	1	5	0.41	0.047	3.547	0.417277	2	6	0.646375	0.129	3.24	0.596	3	11	0.54084	0.15	1.96	0.348822
TRIM63	4	16	0.51	0.169	1.556	0.238605	6	5	2.15571	0.657	7.072	0.205	10	21	0.942555	0.44	2.02	0.879414
TRIO	11	14	1.38	0.623	3.037	0.430036	24	42	1.2072	0.724	2.014	0.471	35	56	1.25537	0.82	1.93	0.300127
TRPM1	4	5	1.59	0.421	6.004	0.494158	18	43	1.0966	0.613	1.962	0.756	21	48	1.11112	0.65	1.91	0.702197
TRPM4	26	77	0.68	0.435	1.076	0.100222	8	26	0.667191	0.297	1.5	0.328	33	102	0.666283	0.45	1	0.0472729
TSEN2	1	2	0.91	0.082	10.042	0.938335	4	4	1.83206	0.457	7.339	0.393	5	6	1.5242	0.46	5.01	0.48718
TTC6	52	86	1.3	0.913	1.858	0.144276	5	6	1.83455	0.53	6.348	0.338	57	91	1.35521	0.96	1.91	0.0816066
TXLNA	0	0	-	-	-	-	1	8	0.295513	0.036	2.456	0.259	1	8	0.295513	0.04	2.46	0.259226
UBE2U	3	11	0.57	0.156	2.064	0.390179	0	2	0	0	Inf	0.992	3	13	0.467749	0.13	1.66	0.239495
USP5	0	1	0	0	Inf	0.994697	8	9	2.16711	0.779	6.028	0.138	8	10	1.89005	0.7	5.07	0.206458
UVSSA	1	10	0.2	0.025	1.565	0.124779	1	13	0.183315	0.024	1.429	0.105	2	23	0.190142	0.04	0.82	0.0255356
WRNIP1	3	0	0	0	Inf	0.989576	12	20	1.23009	0.595	2.542	0.576	15	20	1.56785	0.79	3.1	0.195622
XDH	11	18	1.22	0.57	2.629	0.604634	25	46	1.31742	0.791	2.195	0.29	36	64	1.28937	0.84	1.97	0.242049
ZBTB39	0	0	-	-	-	-	5	5	3.00302	0.836	10.784	0.092	5	5	3.00302	0.84	10.78	0.0918291
ZWINT	2	2	1.83	0.257	12.993	0.546735	0	1	0	0	Inf	0.995	2	3	1.22216	0.2	7.32	0.826171
