# Supplementary material for: Uncovering the Contribution of Moderate-Penetrance Susceptibility Genes to Breast Cancer by Whole-Exome Sequencing and Targeted Enrichment Sequencing of Candidate Genes in Women of European Ancestry
Source: Cancers (Basel). 2022 Jul 11;14(14):3363. doi: 10.3390/cancers14143363 (PMC9317824; doi:10.3390/cancers14143363)
Supplement: Supplementary file 1 [file cancers-14-03363-s001.zip › Table S11-final_16052022.xlsx]

## Sheet: Table S11A
Associations of individual loss of function variants observed in at least 3 carriers among breast cancer cases and controls that included at least 2 breast cancer cases and overall breast cancer risk
Gene symbol	Func_Detail				Overall (single variant base approach)						Overall (gene burden analysis)
	Nucleotide change		Protein change	Func_Type	Number of carriers		OR	95 %CI		p-value	OR	95 %CI		p-value
					Cases	Controls
ABCC2	c.3196C>T		p.R1066*	StopGain	13	8	1.62694	0.673	3.933	0.27986	1.60088	0.857	2.99	0.139939
ABCG2	c.706C>T		p.R236*	StopGain	7	2	3.39529	0.705	16.348	0.127424	1.95114	0.875	4.349	0.102144
ADRA1A	c.1038_1039delCT	c.1035_1036delTC		Frameshift	4	7	0.524454	0.153	1.794	0.303641	0.683704	0.274	1.703	0.414172
ANKK1	c.709C>T		p.R237*	StopGain	15	7	2.15255	0.876	5.288	0.0945724	1.37346	0.629	2.997	0.425379
ATM	c.1236-2_1243delAGGCTACAGA			SpliceSite	4	2	1.78278	0.327	9.734	0.504393	3.54803	2.162	5.823	5.43777e-07
	c.1564_1565delGA	c.1561_1562delAG		Frameshift	9	1	8.76802	1.11	69.277	0.0395244
	c.2922-7_2930delACCACAGCAATGTGTG			SpliceSite	4	1	3.56686	0.399	31.897	0.255254
	c.2926_2930delGTGTG			Frameshift	3	1	2.67427	0.279	25.67	0.393961
	c.3802delG	c.3801delG]	p.V1268_V3056del	StopGain	3	1	2.76162	0.288	26.515	0.378739
	c.5932G>T		p.E1978*	StopGain	3	1	2.67427	0.279	25.67	0.393961
	c.7630-2A>C			SpliceSite	5	1	4.46003	0.521	38.198	0.172406
ATP2A1	c.2025C>A		p.C675*	StopGain	3	1	2.67427	0.279	25.67	0.393961	1.15181	0.553	2.398	0.705654
	c.2464_2465insC	c.2456_2457insC		Frameshift	4	2	1.84087	0.337	10.053	0.481098
ATR	c.2320_2321insA	c.2310_2311insA		Frameshift	3	0		0	inf	0.918963	1.20729	0.629	2.318	0.571358
	c.2079-6_2081delCCCCAGAGA			SpliceSite	7	1	6.24806	0.771	50.605	0.0860147
ATRIP	c.290_291insA	c.284_285insA		Frameshift	3	0		0	inf	0.918652	1.90118	0.649	5.57	0.241436
	c.1152_1155delTGGA		p.T384_G791delinsT	StopGain	4	3	1.18808	0.266	5.313	0.821575
AUNIP	c.117_118delCC			Frameshift	10	10	0.944836	0.393	2.274	0.899236	0.856185	0.363	2.02	0.722862
	c.115delC			Frameshift	10	10	0.944836	0.393	2.274	0.899236
BARD1	c.1954_1955insTGAACAGGAAGAAAAGTATG	c.1921_1922insGAAGAAAAGTATGTGAACAG		Frameshift	3	3	0.915716	0.185	4.541	0.914172	2.54104	0.809	7.982	0.110294
BLM	c.556_557delTC			Frameshift	5	0		0	inf	0.896559	1.40201	0.712	2.762	0.328635
	c.1642C>T		p.Q548*	StopGain	4	2	1.85901	0.34	10.165	0.474396
BPTF	c.8052_8053insG			Frameshift	4	5	0.820834	0.22	3.065	0.76895	1.0189	0.294	3.528	0.97643
	c.8055_8058delTTCA			Frameshift	4	5	0.820834	0.22	3.065	0.76895
BRIP1	c.2273_2274insT	c.2272_2273insT		Frameshift	4	0		0	inf	0.907287	1.64496	0.689	3.926	0.262165
CCDC66	c.698G>A		p.W233*	StopGain	13	18	0.711062	0.348	1.454	0.350013	0.826052	0.637	1.071	0.14874
	c.745_746delGA	c.744_745delAG		Frameshift	5	0		0	inf	0.896559
	c.1279C>T		p.R427*	StopGain	50	78	0.626325	0.438	0.895	0.0102822
	c.1970_1973delCAAA	c.1963_1966delAAAC		Frameshift	5	3	1.68532	0.402	7.067	0.475434
	c.2217_2218insG	c.2215_2216insG		Frameshift	10	6	1.63543	0.593	4.51	0.341857
	c.2401_2402delGA	c.2400_2401delAG		Frameshift	4	4	0.999858	0.249	4.008	0.99984
	c.2547delA	c.2543delA		Frameshift	4	0		0	inf	0.90715
	c.2563_2564insGATT	c.2557_2558insTTGA	p.S855_F914del	StopGain	3	6	0.463934	0.116	1.857	0.277734
CDK11A	c.1735_1736insT	c.1734_1735insT		Frameshift	16	20	0.761976	0.394	1.473	0.418982	0.976132	0.54	1.766	0.936353
CEP104	c.1003C>T		p.Q335*	StopGain	4	2	1.78278	0.327	9.734	0.504393	2.2198	0.912	5.403	0.0788942
CEP55	c.256C>T		p.R86*	StopGain	5	5	1.01685	0.294	3.521	0.97896	0.783861	0.309	1.99	0.608437
CHEK2	c.1263delT	c.1262delT		Frameshift	4	0		0	inf	0.905658	3.46542	2.332	5.149	7.61569e-10
	c.1100delC			Frameshift	86	28	3.08009	2.005	4.732	2.83475e-07
	c.444+1G>A			SpliceSite	9	1	8.12086	1.028	64.128	0.0469772
CIDEB	c.484_485delAT	c.483_484delTA		Frameshift	3	2	1.42257	0.237	8.533	0.699772	0.821496	0.4	1.686	0.591846
	c.336+1G>A			SpliceSite	7	6	1.09415	0.367	3.26	0.87169
CTBP1	c.642_648delGCTGGGG			Frameshift	3	1	2.67427	0.279	25.67	0.393961	3.56686	0.399	31.897	0.255254
	c.640_641insT			Frameshift	3	1	2.67427	0.279	25.67	0.393961
DARS2	c.492+2T>C			SpliceSite	7	1	6.32883	0.781	51.259	0.0838355	1.46611	0.479	4.485	0.502454
DGAT2	c.855C>A		p.Y285*	StopGain	7	14	0.494368	0.199	1.227	0.128705	0.494368	0.199	1.227	0.128705
DNAH11	c.4333C>T		p.R1445*	StopGain	4	4	1.11746	0.279	4.478	0.875391	0.9551	0.562	1.624	0.865284
	c.5778+1G>A			SpliceSite	3	1	3.06887	0.319	29.532	0.331716
	c.6727C>T		p.R2243*	StopGain	4	2	1.95807	0.358	10.712	0.438354
DNAH8	c.8635_8636delGA	c.8633_8634delGA		Frameshift	4	4	1.07919	0.268	4.341	0.914538	0.723646	0.463	1.132	0.15657
	c.9194+1G>A			SpliceSite	3	3	0.915716	0.185	4.541	0.914172
DUOX2	c.2895_2898delGTTC	c.2893_2896delTCGT		Frameshift	28	47	0.567145	0.355	0.907	0.0179926	0.578576	0.418	0.802	0.00100158
	c.602_603insG	c.596_597insG		Frameshift	21	36	0.556983	0.325	0.956	0.0337257
DYNC2H1	c.622-2_624delAGGAG			SpliceSite	3	0		0	inf	0.919789	1.46345	0.78	2.746	0.235688
EFCAB5	c.920C>A		p.S307*	StopGain	12	15	0.781641	0.365	1.673	0.525789	0.847744	0.505	1.423	0.531896
	c.1832_1833delAG	c.1828_1829delAG		Frameshift	5	3	1.62646	0.388	6.818	0.505926
ENO3	c.88C>T		p.R30*	StopGain	3	0		0	inf	0.918883	1.52848	0.623	3.747	0.353798
	c.707_708insTCCAGGCGGCTGGTTA	c.690_691insATCCAGGCGGCTGGTT		Frameshift	3	0		0	inf	0.918219
EPHA10	c.2446G>T		p.E816*	StopGain	3	1	2.74427	0.286	26.352	0.381731	0.952579	0.396	2.293	0.91366
EPN3	c.692_693insC	c.686_687insC		Frameshift	4	7	0.529236	0.155	1.81	0.310512	1.1036	0.613	1.986	0.742233
	c.1189_1202delAAACTCCCCAGCAC	c.1186_1199delCACAAACTCCCCAG		Frameshift	10	5	1.92853	0.658	5.65	0.231086
	c.1568_1575delGGAACCCC	c.1565_1572delCCCGGAAC		Frameshift	3	4	0.707847	0.158	3.168	0.651355
EPS8L2	c.1430_1431insC	c.1428_1429insC		Frameshift	5	2	2.43037	0.471	12.541	0.288842	2.26671	0.585	8.778	0.236164
ERCC2	c.1703_1704delTT	c.1702_1703delTT		Frameshift	5	1	4.53754	0.53	38.866	0.167535	0.985957	0.442	2.199	0.972441
ERCC3	c.1757delA			Frameshift	3	2	1.62727	0.271	9.768	0.594392	0.968527	0.483	1.941	0.928145
	c.325C>T		p.R109*	StopGain	7	7	0.949532	0.332	2.712	0.922963
FANCC	c.67delG	c.65delG		Frameshift	4	8	0.49909	0.15	1.66	0.257049	0.860332	0.409	1.811	0.692099
FANCM	c.682-3_682delAAGG			SpliceSite	5	7	0.635749	0.202	2.005	0.439635	1.03033	0.665	1.596	0.893601
	c.1972C>T		p.R658*	StopGain	5	1	4.78474	0.558	41.014	0.15327
	c.5101C>T		p.Q1701*	StopGain	13	11	1.10574	0.495	2.472	0.806579
	c.5791C>T		p.R1931*	StopGain	10	8	1.27087	0.501	3.227	0.614091
FARP2	c.1588-2A>G			SpliceSite	4	0		0	inf	0.90743	1.49058	0.74	3.003	0.263978
	c.2021_2022delTC	c.2018_2019delCT		Frameshift	7	2	3.24941	0.675	15.646	0.141679
GRM6	c.1861C>T		p.R621*	StopGain	7	1	6.88044	0.849	55.778	0.0708633	1.29269	0.61	2.737	0.502451
HLA-DRB5	c.17_18insG		p.P8fs	Frameshift	31	21	1.40274	0.805	2.445	0.232673	1.42241	0.828	2.444	0.202003
INPP5D	c.349+2T>G			SpliceSite	5	4	1.1697	0.313	4.366	0.815564	1.89056	0.568	6.289	0.299006
IQGAP2	c.1282C>T		p.Q428*	StopGain	4	1	3.84577	0.43	34.422	0.228383	1.22852	0.484	3.119	0.665043
IRAK4	c.877C>T		p.Q293*	StopGain	9	9	0.936828	0.371	2.364	0.89008	0.723611	0.317	1.653	0.442711
KIF4B	c.2137C>T		p.R713*	StopGain	3	0		0	inf	0.918717	1.5995	0.522	4.899	0.410826
KRT36	c.880C>T		p.Q294*	StopGain	11	11	0.956892	0.414	2.211	0.917868	0.940764	0.573	1.545	0.809316
	c.454delC			Frameshift	17	19	0.881318	0.457	1.699	0.705959
LAMC3	c.976+1G>C			SpliceSite	7	4	1.56927	0.459	5.364	0.472434	1.99823	0.861	4.635	0.10684
LIPC	c.739_740insCG	c.737_738insCG		Frameshift	5	6	0.86332	0.263	2.836	0.808657	1.0238	0.329	3.183	0.967587
MED23	c.1614-6_1615delCCTCAGCC			SpliceSite	14	10	1.24836	0.554	2.815	0.592845	1.32218	0.667	2.622	0.424097
MICAL1	c.571+1G>T			SpliceSite	10	14	0.652771	0.289	1.472	0.303901	0.9689	0.532	1.765	0.917793
MSH6	c.3557-3_3567delAAGGTGAAAGTACA			SpliceSite	4	15	0.236574	0.078	0.713	0.0104529	0.363179	0.213	0.62	0.000207264
	c.4002-3_4006delAAGGGAAG			SpliceSite	9	28	0.284257	0.134	0.603	0.0010455
MST1L	c.1830delT		p.C610_G689del	StopGain	5	5	0.987178	0.285	3.419	0.983755	0.875817	0.486	1.577	0.658493
	c.1424_1425insAG	c.1420_1421insAG		Frameshift	7	13	0.549997	0.219	1.381	0.2032
	c.124delC	c.123delC	p.H42fs	Frameshift	3	2	1.49045	0.248	8.947	0.662522
MTMR11	c.1648-1G>T			SpliceSite	4	1	3.56686	0.399	31.897	0.255254	1.23559	0.911	1.677	0.174424
	c.14_15insG	c.7_8insG		Frameshift	90	70	1.25875	0.919	1.725	0.151988
MYH7B	c.1612_1613delAT			Frameshift	21	15	1.36032	0.7	2.643	0.363961	0.970802	0.641	1.471	0.888775
	c.3859_3860delCT	c.3857_3858delCT		Frameshift	3	4	0.758808	0.169	3.399	0.718283
	c.4415_4418delCAGA	c.4410_4413delACAG		Frameshift	3	2	1.40467	0.234	8.427	0.710106
NADSYN1	c.1459C>T		p.R487*	StopGain	3	0		0	inf	0.918865	1.57464	0.651	3.806	0.313358
	c.1833delG	c.1830delG		Frameshift	5	1	5.2195	0.609	44.762	0.131789
NBN	c.2028_2041delTGATGATTATGGTC			Frameshift	3	3	0.890773	0.18	4.417	0.887406	0.648941	0.36	1.169	0.150015
	c.657_661delACAAA	c.654_658delAAAAC		Frameshift	8	10	0.71455	0.282	1.813	0.479212
	c.156_157delTT	c.154_155delTT		Frameshift	4	0		0	inf	0.905702
NF1	c.61-3_61delCAGC			SpliceSite	7	11	0.565934	0.219	1.462	0.23967	0.946272	0.496	1.807	0.86709
	c.3198-3_3200delCAGAGA			SpliceSite	10	0		0	inf	0.903476
NIPBL	c.4422-4_4422delAAAGG			SpliceSite	3	4	0.667835	0.149	2.986	0.597303	0.741979	0.226	2.434	0.622448
NLRP12	c.883_884delGG			Frameshift	3	1	3.24161	0.337	31.193	0.308639	1.04606	0.434	2.519	0.920018
NTHL1	c.268C>T		p.Q90*	StopGain	21	34	0.599919	0.348	1.035	0.0664868	0.810436	0.498	1.318	0.397062
OTOP1	c.382delG			Frameshift	13	10	1.24848	0.546	2.852	0.598563	1.11167	0.528	2.34	0.780485
PALB2	c.3256C>T		p.R1086*	StopGain	3	0		0	inf	0.919789	3.95143	1.98	7.884	9.67528e-05
	c.1240C>T		p.R414*	StopGain	4	1	3.56686	0.399	31.897	0.255254
	c.509_510delGA	c.508_509delAG		Frameshift	12	0		0	inf	0.894163
PCK2	c.68C>G		p.S23*	StopGain	42	37	1.09465	0.702	1.706	0.689701	1.23507	0.93	1.64	0.144108
	c.577C>T		p.R193*	StopGain	3	1	2.67427	0.279	25.67	0.393961
	c.1234+1G>T			SpliceSite	35	23	1.45733	0.86	2.471	0.162037
	c.1468+2T>C			SpliceSite	21	15	1.36969	0.705	2.662	0.353393
PINX1	c.129+1G>A			SpliceSite	3	0		0	inf	0.918438	1.94931	0.356	10.662	0.441349
PLD2	c.1072G>T		p.E358*	StopGain	13	13	0.979178	0.453	2.116	0.957323	0.884365	0.482	1.623	0.691725
PMS2	c.708_709delGC			Frameshift	13	26	0.443082	0.227	0.864	0.0168405	0.529061	0.285	0.984	0.0442624
PRRC2C	c.1195-2A>G			SpliceSite	6	3	2.02504	0.506	8.111	0.318975	2.94793	0.797	10.898	0.105096
RAD1	c.325C>T		p.R109*	StopGain	3	2	1.4408	0.24	8.641	0.689471	1.20578	0.563	2.582	0.629961
	c.168_172delAAAGT			Frameshift	10	5	1.86464	0.637	5.461	0.255756
RAD50	c.3G>A		p.M1I	Translation	3	1	3.18526	0.331	30.623	0.315713	0.966726	0.383	2.44	0.942878
RASEF	c.1049_1050delAT			Frameshift	3	1	2.85409	0.297	27.429	0.363676	1.09054	0.395	3.013	0.867241
RIC1	c.173_174insAG			Frameshift	4	2	1.83278	0.336	10.007	0.484232	0.628981	0.239	1.654	0.34736
	c.176_186delCTGCAAAATCA			Frameshift	4	2	1.83278	0.336	10.007	0.484232
RINT1	c.1333+1G>A			SpliceSite	3	6	0.456767	0.114	1.828	0.268158	0.76296	0.232	2.504	0.655432
RNF175	c.768delT	c.766delT		Frameshift	16	9	1.70726	0.753	3.87	0.20017	1.85091	0.891	3.845	0.098892
	c.765-1G>C			SpliceSite	16	9	1.70726	0.753	3.87	0.20017
RNF181	c.394_398delCGAGA	c.391_395delAGACG	p.R132_T153del	StopGain	4	2	1.85076	0.339	10.117	0.477518	1.20552	0.323	4.501	0.780964
SIRT3	c.12delC	c.11delC		Frameshift	5	16	0.29798	0.109	0.814	0.0181994	0.393328	0.163	0.949	0.0379456
SLC22A13	c.99_100insC	c.96_97insC		Frameshift	5	4	1.34438	0.36	5.023	0.659895	0.865215	0.373	2.008	0.736028
SLC22A5	c.844C>T		p.R282*	StopGain	4	2	2.17633	0.398	11.911	0.369909	2.14721	0.645	7.146	0.21288
SLC2A8	c.465delG	c.461delG		Frameshift	4	3	1.22618	0.274	5.489	0.789745	1.25063	0.651	2.401	0.501585
	c.802C>T		p.Q268*	StopGain	10	9	1.06509	0.432	2.626	0.891065
	c.926delC			Frameshift	5	4	1.21403	0.325	4.532	0.772906
SMARCAL1	c.2542G>T		p.E848*	StopGain	3	5	0.538403	0.129	2.254	0.396743	1.46701	0.568	3.79	0.428682
TMEM206/PACC1	c.631delC	c.630delC		Frameshift	52	29	1.80858	1.146	2.855	0.010941	1.70271	1.105	2.624	0.0158281
TNK1	c.317_318insG	c.311_312insG		Frameshift	6	8	0.804389	0.277	2.332	0.688521	0.754088	0.368	1.543	0.439913
	c.1555C>T		p.R519*	StopGain	3	2	1.60093	0.267	9.601	0.606624
TRIM63	c.739C>T		p.Q247*	StopGain	10	8	1.19648	0.471	3.037	0.70586	0.773824	0.372	1.611	0.493271
TRIO	c.4424-2_4425delAGGG			SpliceSite	5	2	2.22919	0.433	11.484	0.337843	1.15741	0.575	2.331	0.682436
	c.6658-3_6662delAAGGTGAG			SpliceSite	12	10	1.06933	0.461	2.479	0.875835
TRPM4	c.1575G>A		p.W525*	StopGain	20	45	0.422565	0.249	0.717	0.00138989	0.78018	0.558	1.091	0.146868
	c.2254C>T		p.Q752*	StopGain	11	1	10.6368	1.372	82.461	0.0236556
	c.2740A>T		p.K914*	StopGain	19	17	1.07499	0.558	2.072	0.828981
TTC6	c.2996delA	c.2992delA		Frameshift	3	3	0.906018	0.183	4.493	0.903846	1.13101	0.845	1.514	0.40789
	c.3605+1G>A			SpliceSite	4	8	0.451002	0.136	1.498	0.193658
	c.5023-7_5036delATTTTAGGCCCAAGGAAAATT		c.5023-15_5028delGGAAAATTATTTTAGGCCCAA	SpliceSite	78	63	1.22714	0.878	1.715	0.230325
TYRO3	c.308_308+1insCCTGAAGTCA			Frameshift	116	71	1.55016	1.151	2.088	0.00393407	1.39516	1.063	1.831	0.0164571
UBE2U	c.287delC	c.285delC		Frameshift	7	3	2.15121	0.556	8.319	0.26696	0.753399	0.312	1.82	0.529283
XDH	c.1686+1G>C			SpliceSite	8	9	0.872938	0.336	2.268	0.780273	1.24591	0.671	2.313	0.486137
ZFAND1	c.259_260insT	c.254_255insT		Frameshift	3	0		0	inf	0.919789	1.73012	1.117	2.68	0.0140625
	c.139-3_139delCAGG			SpliceSite	53	27	1.76192	1.105	2.808	0.0172387

## Sheet: Table S11B
Associations of individual rare missense variants observed in at least 3 carriers among breast cancer cases and controls that included at least 2 breast cancer case and overall breast cancer risk
Gene symbol	Func_Detail		Overall (single variant base approach)						Overall (gene burden analysis)
	Nucleotide change	Protein change	Number of carriers		OR	95 %CI		p-value	OR	95 %CI		p-value
			Cases	Controls
ABCC2	c.1493G>A	p.R498H	3	0		0	inf	0.918963	1.28883	0.912	1.821	0.150266
	c.2302C>T	p.R768W	4	1	3.80214	0.425	34.049	0.232458
	c.3008G>T	p.W1003L	2	7	0.275495	0.057	1.327	0.108056
	c.3236G>A	p.R1079Q	6	6	0.998819	0.321	3.104	0.998371
	c.3298C>T	p.R1100C	10	6	1.60171	0.581	4.415	0.362565
	c.3500T>C	p.V1167A	6	3	1.86198	0.465	7.451	0.379608
	c.3629G>A	p.R1210H	3	1	2.85409	0.297	27.429	0.363676
	c.4190C>T	p.P1397L	2	2	0.977527	0.137	6.958	0.981891
	c.4210G>A	p.E1404K	2	1	1.86019	0.169	20.515	0.61231
ABCG2	c.1714A>C	p.S572R	5	2	2.24942	0.437	11.587	0.332404	0.838048	0.418	1.681	0.618792
ADAMTS12	c.2893C>T	p.R965W	2	1	1.9374	0.175	21.429	0.589663	1.18186	0.84	1.663	0.33739
	c.1496T>A	p.L499Q	44	40	1.05474	0.686	1.622	0.808213
	c.1153C>T	p.P385S	3	0		0	inf	0.918479
	c.975G>C	p.Q325H	2	1	2.10232	0.19	23.256	0.544566
ADRA1A	c.877C>T	p.P293S	5	3	1.51665	0.362	6.35	0.56863	1.26597	0.581	2.76	0.553156
ADSSL1/ADSS1	c.542G>A	p.R181H	3	1	2.67427	0.279	25.67	0.393961	1.48551	0.867	2.545	0.149587
	c.910C>T	p.R304C	2	1	1.78227	0.162	19.646	0.636973
	c.911G>A	p.R304H	5	2	2.4171	0.468	12.473	0.291819
ATM	c.902G>A	p.G301D	2	2	0.986869	0.139	7.023	0.989467	1.66786	1.322	2.104	1.56248e-05
	c.1009C>T	p.R337C	4	1	3.80214	0.425	34.049	0.232458
	c.1595G>A	p.C532Y	4	5	0.766808	0.205	2.861	0.692702
	c.2932T>C	p.S978P	11	5	2.11285	0.733	6.089	0.165985
	c.4324T>C	p.Y1442H	8	11	0.684098	0.275	1.704	0.414818
	c.4388T>G	p.F1463C	6	6	0.967076	0.311	3.005	0.953847
	c.5303G>A	p.R1768K	2	1	1.78227	0.162	19.646	0.636973
	c.5306C>A	p.T1769K	4	2	1.78278	0.327	9.734	0.504393
	c.5821G>C	p.V1941L	3	2	1.47578	0.246	8.863	0.670472
	c.6820G>A	p.A2274T	3	2	1.40467	0.234	8.427	0.710106
	c.6919C>T	p.L2307F	24	4	5.94343	2.059	17.159	0.000985295
	c.7271T>G	p.V2424G	3	1	3.08695	0.321	29.691	0.329084
	c.7475T>G	p.L2492R	9	6	1.40332	0.499	3.949	0.520895
	c.7865C>G	p.A2622G	2	2	0.919667	0.129	6.535	0.933292
	c.7875T>G	p.D2625E	5	1	4.65804	0.544	39.911	0.160356
	c.7876G>C	p.A2626P	5	1	4.65804	0.544	39.911	0.160356
	c.8155C>T	p.R2719C	3	5	0.590123	0.141	2.475	0.470848
	c.8494C>T	p.R2832C	3	0		0	inf	0.918361
	c.8734A>G	p.R2912G	6	4	1.47115	0.414	5.224	0.550429
ATP2A1	c.328C>T	p.R110W	6	1	5.35378	0.645	44.463	0.120313	0.98087	0.671	1.434	0.920531
	c.971G>A	p.R324H	3	0		0	inf	0.918789
	c.1423A>T	p.I475F	2	2	0.934414	0.131	6.643	0.945954
ATP2C1	c.2185C>G	p.L729V	2	2	0.993239	0.14	7.07	0.994595	0.950099	0.51	1.769	0.871755
ATR	c.6226C>G	p.L2076V	4	5	0.743297	0.199	2.772	0.658669	0.803168	0.486	1.327	0.392226
	c.6023G>T	p.R2008L	7	5	1.43853	0.455	4.544	0.53547
ATRIP	c.2230G>T	p.V744F	4	1	3.7552	0.419	33.637	0.236878	0.948598	0.41	2.192	0.901745
BARD1	c.1568T>C	p.V523A	2	1	2.00338	0.181	22.141	0.570834	1.30948	0.742	2.31	0.351866
	c.1339C>G	p.L447V	3	2	1.50928	0.252	9.056	0.652512
BRIP1	c.2087C>T	p.P696L	3	2	1.39732	0.233	8.381	0.714339	1.73177	0.829	3.619	0.14422
C6orf57/SDHAF4	c.311G>A	p.R104H	5	14	0.334203	0.12	0.928	0.0354643	0.311046	0.113	0.856	0.0237698
CDH1	c.88C>A	p.P30T	21	25	0.822382	0.46	1.472	0.510176	0.971479	0.652	1.447	0.886736
	c.2494G>A	p.V832M	3	0		0	inf	0.919789
CEP104	c.805G>A	p.A269T	5	3	1.64572	0.392	6.902	0.495834	1.36557	0.668	2.792	0.393198
	c.215T>C	p.I72T	2	1	2.02017	0.183	22.318	0.566157
CHEK2	c.1270T>C	p.Y424H	5	0		0	inf	0.895746	1.95453	1.354	2.821	0.000342839
	c.1039G>A	p.D347N	3	1	2.67427	0.279	25.67	0.393961
	c.1036C>T	p.R346C	4	0		0	inf	0.906055
	c.751A>T	p.I251F	2	1	1.84443	0.167	20.344	0.617213
	c.539G>A	p.R180H	2	3	0.626102	0.105	3.751	0.608219
	c.538C>T	p.R180C	16	11	1.36786	0.634	2.952	0.424855
	c.507T>G	p.F169L	3	2	1.42553	0.238	8.549	0.698068
	c.479T>C	p.I160T	2	1	1.88389	0.171	20.776	0.605073
	c.433C>T	p.R145W	5	2	2.3114	0.448	11.921	0.316803
	c.349A>G	p.R117G	6	4	1.39513	0.393	4.951	0.60637
	c.7C>T	p.R3W	4	0		0	inf	0.906428
CLCN2	c.1795G>A	p.D599N	12	12	0.966583	0.433	2.156	0.933805	0.764634	0.546	1.07	0.117352
	c.1633G>A	p.A545T	4	2	1.87862	0.344	10.27	0.466901
	c.1529C>T	p.A510V	2	4	0.521871	0.095	2.853	0.45307
	c.1214C>T	p.T405M	2	1	1.9374	0.175	21.429	0.589663
	c.719T>C	p.L240P	3	5	0.579052	0.138	2.427	0.454965
	c.704G>A	p.R235Q	8	23	0.334576	0.15	0.749	0.00770837
	c.634G>A	p.A212T	3	1	3.0751	0.32	29.575	0.330723
	c.206G>T	p.C69F	3	0		0	inf	0.919789
CLUH	c.2365C>G	p.L789V	2	5	0.371527	0.072	1.916	0.236729	0.619712	0.388	0.99	0.0453345
	c.758C>T	p.A253V	2	2	0.890808	0.125	6.328	0.907981
COL5A2	c.2881C>T	p.P961S	2	1	1.78227	0.162	19.646	0.636973	0.76167	0.475	1.22	0.257454
	c.2291C>G	p.P764R	2	1	2.17191	0.197	23.977	0.526728
	c.463C>T	p.R155C	2	2	0.962055	0.135	6.849	0.969187
DARS2	c.536G>A	p.R179H	2	2	0.890808	0.125	6.328	0.907981	0.576913	0.28	1.19	0.136465
	c.1441G>A	p.V481M	2	1	1.8207	0.165	20.072	0.624605
DGAT2	c.1049C>G	p.P350R	2	1	1.78227	0.162	19.646	0.636973	2.23224	0.576	8.645	0.245059
DNAH11	c.2060A>G	p.Y687C	3	1	2.67427	0.279	25.67	0.393961	0.954478	0.735	1.239	0.726206
	c.4224G>T	p.R1408S	7	3	2.33787	0.604	9.054	0.218939
	c.8572G>A	p.G2858S	4	6	0.59339	0.167	2.105	0.419138
	c.9790C>G	p.P3264A	2	2	1.10891	0.155	7.909	0.917855
	c.13184G>T	p.R4395L	4	3	1.19895	0.268	5.361	0.812311
DNAH8	c.5528A>G	p.D1843G	4	1	3.68777	0.412	32.983	0.243035	1.23863	0.906	1.694	0.179938
	c.5603T>G	p.V1868G	5	6	0.819011	0.249	2.69	0.742089
	c.10631C>T	p.A3544V	2	1	1.90081	0.172	20.976	0.600084
	c.10795G>T	p.V3599L	5	0		0	inf	0.895406
	c.13691T>C	p.M4564T	2	2	0.905137	0.127	6.43	0.920635
DUOX2	c.4637A>G	p.E1546G	20	17	1.09562	0.573	2.095	0.782437	0.944627	0.718	1.243	0.684274
	c.4235A>G	p.K1412R	2	2	1.04969	0.147	7.488	0.961416
	c.4097C>T	p.P1366L	3	1	3.20012	0.333	30.786	0.313917
	c.3910C>T	p.R1304W	2	1	1.8207	0.165	20.072	0.624605
	c.3518C>T	p.S1173F	2	3	0.679463	0.113	4.081	0.672651
	c.3397G>C	p.A1133P	3	0		0	inf	0.918395
	c.3391G>A	p.A1131T	5	8	0.621537	0.203	1.905	0.405238
	c.3175C>T	p.R1059C	2	3	0.635657	0.106	3.813	0.620097
	c.2894C>T	p.S965L	3	0		0	inf	0.918865
	c.2597T>G	p.M866R	3	1	2.67427	0.279	25.67	0.393961
	c.2138A>G	p.E713G	3	0		0	inf	0.918963
	c.1415C>A	p.A472D	12	11	1.04396	0.46	2.37	0.918101
	c.1189C>A	p.Q397K	3	0		0	inf	0.91905
DYNC2H1	c.1288C>T	p.R430C	11	3	3.56435	0.993	12.793	0.0512542	0.847506	0.669	1.074	0.171106
	c.2908A>T	p.N970Y	3	1	2.89471	0.301	27.842	0.357422
	c.3169C>T	p.R1057C	2	1	1.84443	0.167	20.344	0.617213
	c.5315G>A	p.C1772Y	3	0		0	inf	0.919789
	c.8585G>A	p.C2862Y	5	1	4.46003	0.521	38.198	0.172406
	c.9044A>G	p.D3015G	5	8	0.576182	0.188	1.763	0.333877
	c.9655G>A	p.E3219K	6	2	2.7104	0.547	13.421	0.221839
	c.10571G>A	p.R3524H	3	0		0	inf	0.918865
	c.11507C>T	p.T3836I	2	1	1.86019	0.169	20.515	0.61231
	c.11510A>G	p.Y3837C	2	1	1.78227	0.162	19.646	0.636973
	c.11624C>G	p.A3875G	2	1	1.78227	0.162	19.646	0.636973
EEFSEC	c.266C>G	p.T89R	9	6	1.37688	0.489	3.873	0.544465	0.986154	0.487	1.998	0.96912
EFCAB5	c.4383G>C	p.W1461C	3	0		0	inf	0.918652	1.13731	0.381	3.391	0.817426
EHHADH	c.2081C>T	p.P694L	2	3	0.635657	0.106	3.813	0.620097	0.926017	0.493	1.738	0.810937
EML5	c.5174C>T	p.T1725I	3	0		0	inf	0.919789	1.22955	0.734	2.059	0.432312
	c.4951C>T	p.R1651C	2	1	1.92041	0.174	21.232	0.594565
	c.4297C>T	p.H1433Y	2	3	0.632254	0.105	3.792	0.615925
ENO3	c.77C>A	p.T26K	5	8	0.618288	0.202	1.893	0.39973	1.15613	0.662	2.02	0.610389
	c.467G>A	p.G156D	2	3	0.630878	0.105	3.784	0.614258
EPN3	c.23G>A	p.R8H	2	1	2.27657	0.206	25.113	0.501817	1.26294	0.68	2.345	0.459686
	c.74G>A	p.R25H	8	6	1.35247	0.468	3.908	0.577008
	c.458G>A	p.R153H	2	1	1.84443	0.167	20.344	0.617213
EPS8L2	c.1584G>C	p.W528C	28	26	1.05279	0.616	1.799	0.850776	1.00694	0.608	1.667	0.97853
ERCC2	c.2171T>C	p.M724T	4	0		0	inf	0.906222	1.44594	1.005	2.081	0.047154
	c.2164C>T	p.R722W	4	1	3.82966	0.428	34.287	0.229889
	c.2150C>G	p.A717G	7	5	1.33433	0.423	4.213	0.622964
	c.1891C>T	p.R631C	2	1	1.8207	0.165	20.072	0.624605
	c.1847G>C	p.R616P	7	7	1.04217	0.365	2.978	0.93854
	c.1802G>A	p.R601Q	7	9	0.765686	0.285	2.06	0.596981
	c.1381C>G	p.L461V	7	6	1.10547	0.371	3.296	0.857252
	c.260T>C	p.L87P	2	1	1.90081	0.172	20.976	0.600084
	c.92C>T	p.T31M	2	3	0.621456	0.104	3.722	0.602469
ERCC3	c.2087T>G	p.M696R	2	4	0.462991	0.085	2.531	0.374285	1.14772	0.667	1.975	0.618795
	c.1558C>T	p.R520W	3	0		0	inf	0.919068
	c.314A>G	p.E105G	6	5	1.1522	0.351	3.782	0.81528
ERCC4	c.37G>A	p.A13T	2	2	0.913753	0.129	6.494	0.928172	0.677949	0.371	1.239	0.206328
	c.1619C>T	p.S540L	3	3	1.12775	0.227	5.596	0.883047
FANCA	c.4064A>T	p.H1355L	2	1	1.986	0.18	21.944	0.575635	0.954666	0.771	1.182	0.670582
	c.3764A>C	p.E1255A	3	2	1.47578	0.246	8.863	0.670472
	c.3551G>C	p.R1184P	6	3	1.92543	0.481	7.71	0.354669
	c.3430C>T	p.R1144W	10	17	0.56901	0.26	1.245	0.157932
	c.3412C>G	p.L1138V	3	1	2.67427	0.279	25.67	0.393961
	c.3391A>G	p.T1131A	2	1	1.97822	0.179	21.865	0.577872
	c.1874G>C	p.C625S	44	47	0.883882	0.585	1.336	0.55828
	c.1340C>T	p.S447L	5	4	1.16591	0.313	4.349	0.819212
	c.1279A>G	p.M427V	3	1	2.83322	0.295	27.206	0.366874
	c.812A>C	p.Q271P	3	0		0	inf	0.918361
FANCC	c.748C>A	p.L250I	3	3	0.906018	0.183	4.493	0.903846	1.24765	0.525	2.966	0.616537
	c.739C>T	p.L247F	2	2	0.890808	0.125	6.328	0.907981
FANCD2OS	c.278C>G	p.P93R	4	3	1.31074	0.292	5.875	0.723673	0.694101	0.397	1.215	0.20111
	c.11A>G	p.Y4C	12	20	0.603435	0.294	1.237	0.167717
FANCM	c.1597C>T	p.R533C	2	6	0.336723	0.068	1.67	0.182801	0.550236	0.292	1.036	0.0643546
FARP2	c.661G>A	p.E221K	2	1	1.88389	0.171	20.776	0.605073	1.00412	0.65	1.551	0.985225
	c.794T>C	p.F265S	3	6	0.493569	0.123	1.978	0.31875
	c.1025G>A	p.R342K	3	4	0.716922	0.16	3.211	0.663548
	c.2273G>A	p.R758H	5	1	4.53754	0.53	38.866	0.167535
FGFR3	c.1753C>T	p.P585S	4	2	1.80176	0.33	9.837	0.496597	0.830165	0.535	1.288	0.406303
FHL3	c.772C>G	p.L258V	27	26	0.996266	0.58	1.711	0.98918	1.04461	0.667	1.637	0.848954
	c.49C>T	p.R17C	3	1	2.67427	0.279	25.67	0.393961
FIGNL1	c.1417A>C	p.K473Q	7	10	0.741206	0.281	1.952	0.544399	0.622959	0.35	1.109	0.107787
FOXM1	c.2260C>T	p.R754C	3	1	3.22205	0.335	31.007	0.311154	0.638777	0.31	1.318	0.22537
GINS4	c.511G>C	p.V171L	5	1	4.95829	0.578	42.524	0.144228	0.900058	0.365	2.22	0.81921
GNE	c.2086G>T	p.V696L	19	20	0.958344	0.51	1.799	0.894674	1.24067	0.817	1.884	0.311871
	c.1892C>T	p.A631V	2	1	1.9374	0.175	21.429	0.589663
	c.1234G>A	p.V412I	3	1	2.89471	0.301	27.842	0.357422
GRM6	c.2020C>T	p.R674C	3	3	0.943613	0.19	4.685	0.94341	1.07102	0.755	1.519	0.700116
	c.1958G>A	p.R653H	4	0		0	inf	0.90743
	c.1957C>T	p.R653C	2	3	0.613607	0.102	3.675	0.592793
	c.1840C>T	p.P614S	3	1	2.94072	0.306	28.279	0.350295
	c.1838C>T	p.T613M	5	6	0.828566	0.252	2.721	0.756585
	c.1405C>T	p.R469W	2	2	1.03249	0.145	7.354	0.974536
	c.1214T>C	p.I405T	3	1	2.99423	0.311	28.835	0.342606
	c.780C>G	p.F260L	4	0		0	inf	0.905658
GZMB	c.67G>A	p.G23R	2	3	0.667478	0.111	4.004	0.658326	0.655189	0.233	1.844	0.423272
IQGAP2	c.295C>T	p.R99C	2	1	1.97822	0.179	21.865	0.577872	1.00086	0.583	1.718	0.997526
	c.3227T>C	p.I1076T	3	3	1.02377	0.206	5.088	0.977088
IRAK4	c.35G>A	p.R12H	3	1	2.78812	0.29	26.77	0.374283	0.868395	0.505	1.492	0.609336
	c.190A>G	p.K64E	3	0		0	inf	0.91878
	c.529A>G	p.T177A	7	14	0.505183	0.204	1.254	0.140978
ITGA10	c.671C>T	p.T224M	99	115	0.839945	0.64	1.102	0.208006	0.946225	0.75	1.195	0.641976
	c.895C>T	p.R299C	4	0		0	inf	0.906055
	c.1561C>T	p.R521C	4	1	3.94897	0.441	35.4	0.219689
	c.1712C>T	p.A571V	2	2	1.00653	0.141	7.176	0.994817
KIF18A	c.331G>T	p.A111S	2	1	1.97822	0.179	21.865	0.577872	0.494955	0.169	1.451	0.199888
KRT40	c.829G>A	p.E277K	7	7	0.967323	0.339	2.764	0.950542	1.00611	0.507	1.995	0.986091
	c.737T>C	p.L246P	3	1	2.81662	0.293	27.061	0.369695
LAMC3	c.1252G>A	p.G418R	2	1	1.92041	0.174	21.232	0.594565	0.933559	0.505	1.726	0.826409
LDHD	c.1336G>A	p.G446R	2	2	1.04906	0.147	7.465	0.96185	1.1664	0.625	2.178	0.629123
	c.1319C>T	p.T440M	6	6	0.921669	0.297	2.862	0.887779
	c.1204G>A	p.G402S	2	1	1.84443	0.167	20.344	0.617213
LIPC	c.317C>T	p.A106V	3	0		0	inf	0.918963	1.192	0.84	1.691	0.325162
	c.866C>T	p.S289F	13	10	1.2402	0.543	2.834	0.609594
	c.1214C>T	p.T405M	34	23	1.3663	0.803	2.323	0.249281
	c.1231G>C	p.G411R	5	4	1.1528	0.309	4.3	0.832336
LRIG3	c.2117G>T	p.R706L	2	2	0.905137	0.127	6.43	0.920635	0.933845	0.476	1.832	0.842238
	c.1657C>T	p.R553W	2	1	2.17191	0.197	23.977	0.526728
	c.1204A>G	p.T402A	2	2	0.890808	0.125	6.328	0.907981
MAGI1	c.1715C>T	p.S572L	2	1	1.86019	0.169	20.515	0.61231	1.67511	0.886	3.167	0.11248
MARCO	c.956G>T	p.G319V	7	6	1.14853	0.385	3.424	0.803768	0.721835	0.35	1.489	0.377411
	c.1018G>T	p.G340W	2	7	0.254052	0.053	1.222	0.0873787
MCM5	c.38A>G	p.D13G	2	1	1.9374	0.175	21.429	0.589663	1.00586	0.536	1.888	0.985496
	c.1199T>C	p.I400T	2	1	1.986	0.18	21.944	0.575635
	c.2038A>G	p.K680E	5	2	2.22919	0.433	11.484	0.337843
MED23	c.3983G>A	p.R1328H	4	0		0	inf	0.906567	1.31191	0.781	2.203	0.30458
	c.3126G>T	p.W1042C	3	0		0	inf	0.919625
	c.235C>T	p.L79F	3	3	0.890773	0.18	4.417	0.887406
MEN1	c.803A>G	p.Y268C	2	1	2.0717	0.188	22.882	0.552286	5.92753	1.326	26.504	0.019863
MICAL1	c.1223G>A	p.R408Q	2	1	1.78227	0.162	19.646	0.636973	1.48795	0.755	2.932	0.250903
	c.286G>A	p.G96R	2	1	1.92041	0.174	21.232	0.594565
MLH1	c.1633A>G	p.T545A	2	2	1.01617	0.143	7.237	0.987223	0.881347	0.532	1.46	0.623643
	c.2174G>A	p.R725H	2	1	1.88389	0.171	20.776	0.605073
MSH2	c.2178G>C	p.M726I	2	1	1.78227	0.162	19.646	0.636973	0.96395	0.525	1.768	0.905586
MSH6	c.1474A>G	p.M492V	6	1	5.60572	0.675	46.583	0.110582	0.759498	0.529	1.09	0.135783
	c.1729C>T	p.R577C	3	0		0	inf	0.919789
	c.3283C>T	p.R1095C	3	1	2.94072	0.306	28.279	0.350295
	c.3758T>A	p.V1253E	2	3	0.593655	0.099	3.555	0.567977
	c.3961A>G	p.R1321G	3	6	0.494481	0.123	1.98	0.319804
MTMR11	c.1295C>T	p.P432L	3	1	3.10775	0.323	29.899	0.326264	1.40345	0.782	2.518	0.255852
	c.308T>C	p.I103T	6	6	0.946756	0.305	2.943	0.92466
	c.85A>T	p.M29L	2	1	1.78227	0.162	19.646	0.636973
MUTYH	c.1435G>A	p.E479K	2	1	1.96099	0.177	21.668	0.582711	0.989119	0.782	1.251	0.927161
	c.1420C>T	p.R474C	3	0		0	inf	0.918395
	c.1187G>A	p.G396D	62	75	0.817134	0.582	1.147	0.242813
	c.925C>T	p.R309C	9	9	0.972919	0.385	2.456	0.95366
	c.667A>G	p.I223V	9	3	2.86943	0.776	10.606	0.114034
	c.536A>G	p.Y179C	34	26	1.27015	0.761	2.121	0.360468
	c.325C>T	p.R109W	3	0		0	inf	0.918717
	c.313G>A	p.D105N	2	2	0.919667	0.129	6.535	0.933292
MYH7B	c.650T>A	p.I217N	2	3	0.593655	0.099	3.555	0.567977	1.27562	0.939	1.733	0.119141
	c.682A>T	p.N228Y	2	2	0.949393	0.133	6.754	0.958625
	c.1082G>C	p.G361A	2	1	1.86019	0.169	20.515	0.61231
	c.1460G>A	p.R487Q	3	0		0	inf	0.919259
	c.2630C>T	p.S877L	3	2	1.37126	0.229	8.212	0.729546
	c.3286G>C	p.D1096H	2	2	0.905137	0.127	6.43	0.920635
	c.3770A>G	p.D1257G	2	1	2.27657	0.206	25.113	0.501817
	c.3940G>A	p.E1314K	2	1	1.90081	0.172	20.976	0.600084
	c.4273G>A	p.E1425K	2	1	2.17191	0.197	23.977	0.526728
NADSYN1	c.230C>T	p.P77L	2	3	0.653694	0.109	3.925	0.642072	0.967552	0.596	1.571	0.893904
	c.551C>T	p.P184L	2	2	1.08356	0.152	7.709	0.936112
	c.716G>A	p.R239H	2	4	0.461109	0.084	2.52	0.371707
NBN	c.664T>C	p.F222L	2	2	0.934414	0.131	6.643	0.945954	1.21117	0.662	2.215	0.534042
	c.595C>T	p.P199S	3	2	1.35381	0.226	8.107	0.740094
	c.456G>A	p.M152I	3	3	0.97664	0.197	4.853	0.976946
NEK1	c.2140C>T	p.R714C	3	4	0.697595	0.156	3.122	0.637684	0.604551	0.317	1.154	0.127226
NF1	c.5450C>G	p.S1817C	7	4	1.64777	0.482	5.638	0.426208	0.950952	0.586	1.544	0.838768
NIPBL	c.2603G>A	p.R868Q	4	6	0.606288	0.171	2.152	0.438736	0.654946	0.427	1.004	0.0520202
	c.6988C>G	p.P2330A	2	1	2.10232	0.19	23.256	0.544566
NLRP12	c.2753T>C	p.L918P	3	3	0.900313	0.182	4.464	0.897712	0.764174	0.395	1.477	0.423787
	c.1294A>G	p.T432A	2	1	2.17191	0.197	23.977	0.526728
	c.1022C>T	p.T341I	2	6	0.310339	0.063	1.537	0.151753
NTHL1	c.856G>A	p.G286S	2	1	1.78227	0.162	19.646	0.636973	1.27416	0.852	1.905	0.237655
	c.527T>C	p.I176T	30	19	1.52266	0.856	2.71	0.152752
	c.298C>T	p.R100C	14	15	0.89868	0.433	1.865	0.774303
NTRK3	c.200G>A	p.G67E	3	2	1.40467	0.234	8.427	0.710106	1.17644	0.558	2.479	0.669127
OPRM1	c.520C>G	p.P174A	3	2	1.37126	0.229	8.212	0.729546	1.0524	0.494	2.244	0.894806
	c.1043G>T	p.C348F	2	1	2.27657	0.206	25.113	0.501817
PALB2	c.3235G>T	p.A1079S	2	1	1.78227	0.162	19.646	0.636973	0.754165	0.522	1.091	0.133787
	c.2816T>G	p.L939W	17	32	0.513722	0.285	0.927	0.0268684
	c.1748T>G	p.L583W	2	1	1.84443	0.167	20.344	0.617213
	c.1250C>A	p.S417Y	2	5	0.368075	0.071	1.898	0.232381
PARP2	c.595G>A	p.G199R	3	0		0	inf	0.919625	0.726803	0.306	1.728	0.470218
PCK2	c.644G>A	p.G215D	3	0		0	inf	0.919789	1.01461	0.622	1.654	0.953592
	c.1607G>A	p.R536Q	6	3	1.95333	0.488	7.823	0.344266
	c.1681C>T	p.R561W	2	1	2.27657	0.206	25.113	0.501817
PIK3CA	c.1130C>G	p.P377R	2	1	1.88389	0.171	20.776	0.605073	0.799693	0.374	1.712	0.56482
PIK3CG	c.2801G>T	p.G934V	3	0		0	inf	0.918395	1.68345	0.8	3.543	0.170177
PLD2	c.2447G>A	p.R816Q	2	1	2.10232	0.19	23.256	0.544566	1.01656	0.523	1.976	0.961374
PMS2	c.1048C>T	p.L350F	2	1	1.90081	0.172	20.976	0.600084	1.42427	0.894	2.27	0.136948
	c.632G>A	p.R211Q	3	2	1.33665	0.223	8.004	0.750673
	c.86G>C	p.G29A	10	9	1.02259	0.415	2.521	0.961301
	c.53T>C	p.I18T	9	2	4.74316	1.022	22.011	0.046823
POLR3A	c.4036T>A	p.C1346S	3	1	2.83077	0.294	27.228	0.367627	1.01975	0.753	1.381	0.899448
	c.3436G>A	p.A1146T	14	14	0.963708	0.459	2.025	0.922284
	c.2993G>A	p.R998H	3	7	0.424505	0.11	1.644	0.214756
	c.2062C>T	p.P688S	2	1	2.2388	0.203	24.71	0.510652
	c.1991T>A	p.F664Y	2	1	1.78227	0.162	19.646	0.636973
	c.1729G>A	p.E577K	2	5	0.378937	0.073	1.954	0.246264
	c.496G>A	p.V166I	4	1	4.46766	0.498	40.093	0.181229
	c.452G>A	p.R151Q	3	2	1.66749	0.277	10.029	0.576442
PRMT9	c.2107G>C	p.V703L	2	3	0.67265	0.112	4.034	0.664405	1.23441	0.54	2.82	0.617291
PTCH1	c.4129G>A	p.V1377M	2	1	1.9374	0.175	21.429	0.589663	1.01817	0.689	1.504	0.927964
	c.3487G>A	p.G1163S	12	9	1.37129	0.576	3.265	0.475644
	c.2671G>A	p.G891S	4	1	4.2046	0.469	37.658	0.199163
	c.1993C>T	p.R665C	2	1	1.90081	0.172	20.976	0.600084
	c.884C>T	p.P295L	4	0		0	inf	0.906748
PTEN	c.1061C>A	p.P354Q	3	1	2.89471	0.301	27.842	0.357422	1.87862	0.344	10.27	0.466901
PTK2B	c.131G>C	p.C44S	2	1	1.90081	0.172	20.976	0.600084	1.0972	0.593	2.03	0.767716
	c.1808C>T	p.T603M	2	2	0.890808	0.125	6.328	0.907981
PYROXD1	c.1284G>C	p.Q428H	4	4	1.00464	0.251	4.027	0.994787	1.86592	0.743	4.685	0.184179
RAD51D	c.620C>T	p.S207L	2	2	1.04969	0.147	7.488	0.961416	0.931235	0.47	1.847	0.838382
	c.137C>G	p.S46C	3	1	2.92119	0.304	28.086	0.353233
RECQL	c.1241G>A	p.C414Y	5	1	4.83524	0.564	41.476	0.150669	1.68686	0.911	3.123	0.0960798
	c.760A>G	p.T254A	8	2	3.66255	0.778	17.249	0.100598
	c.518T>A	p.V173D	5	3	1.65859	0.396	6.954	0.489041
RIC1	c.1904G>A	p.R635H	12	2	6.07242	1.357	27.17	0.0183026	1.47147	0.901	2.402	0.122534
	c.1927G>A	p.V643M	2	2	0.977527	0.137	6.958	0.981891
	c.3764A>T	p.K1255I	3	2	1.66749	0.277	10.029	0.576442
RINT1	c.1985T>C	p.L662S	3	1	3.04387	0.317	29.258	0.335018	1.94678	0.664	5.704	0.22453
RNF175	c.756T>G	p.C252W	10	7	1.46658	0.557	3.861	0.438108	1.43124	0.663	3.089	0.361075
	c.317T>G	p.L106R	4	0		0	inf	0.90715
SCN7A	c.4054C>T	p.R1352W	3	4	0.818334	0.183	3.664	0.79323	0.703626	0.449	1.103	0.125091
	c.3610G>A	p.G1204R	3	2	1.43351	0.239	8.599	0.693594
	c.2042T>C	p.V681A	3	4	0.692533	0.155	3.098	0.630758
	c.1111A>G	p.M371V	2	3	0.621456	0.104	3.722	0.602469
	c.538T>A	p.W180R	2	3	0.647045	0.108	3.885	0.634065
SEC23B	c.325G>A	p.E109K	5	3	1.63403	0.39	6.849	0.501821	1.0755	0.706	1.638	0.734387
	c.389T>C	p.I130T	3	2	1.38176	0.231	8.276	0.723286
	c.757C>T	p.P253S	2	1	2.06722	0.187	22.879	0.553804
	c.2101C>T	p.R701C	2	1	1.78227	0.162	19.646	0.636973
SERPINB10	c.551T>G	p.V184G	2	1	1.97822	0.179	21.865	0.577872	1.49138	0.487	4.564	0.483693
SERPINF1	c.242C>G	p.S81C	8	3	2.57357	0.682	9.709	0.162901	0.868717	0.451	1.674	0.674194
	c.1088A>C	p.E363A	3	0		0	inf	0.919471
SIPA1L1	c.118C>T	p.R40W	3	2	1.4408	0.24	8.641	0.689471	1.68462	1.064	2.667	0.0260931
	c.2215G>A	p.V739I	3	3	0.915716	0.185	4.541	0.914172
	c.2486C>A	p.S829Y	3	1	2.9976	0.312	28.829	0.341827
	c.3439C>T	p.R1147W	7	2	3.14462	0.654	15.13	0.152897
SIRT3	c.62G>A	p.G21D	6	2	2.6759	0.54	13.249	0.22782	0.476981	0.238	0.955	0.0366536
	c.10G>T	p.A4S	5	16	0.29798	0.109	0.814	0.0181994
SLC22A13	c.1345C>T	p.R449W	2	1	1.97822	0.179	21.865	0.577872	1.00052	0.416	2.409	0.999076
SLC22A5	c.136C>T	p.P46S	20	13	1.49871	0.744	3.019	0.257374	1.37862	0.855	2.223	0.187593
	c.680G>A	p.R227H	2	1	1.90081	0.172	20.976	0.600084
	c.761G>A	p.R254Q	3	2	1.47578	0.246	8.863	0.670472
SLC2A8	c.317C>A	p.P106H	7	6	1.09098	0.366	3.252	0.875811	0.926143	0.568	1.509	0.758036
	c.425C>T	p.P142L	2	1	2.10232	0.19	23.256	0.544566
	c.439G>A	p.E147K	2	2	0.913753	0.129	6.494	0.928172
	c.778G>A	p.G260S	7	6	1.17529	0.394	3.505	0.77205
SLC4A7	c.2503A>G	p.T835A	2	2	0.946807	0.133	6.743	0.95648	1.39473	0.784	2.481	0.257545
SLC4A8	c.2849G>A	p.R950H	3	0		0	inf	0.919789	0.925459	0.441	1.944	0.837924
SLC4A9	c.778C>T	p.R260W	17	17	0.898409	0.458	1.763	0.75542	1.02678	0.664	1.587	0.905353
	c.1148C>T	p.A383V	3	1	2.67427	0.279	25.67	0.393961
	c.2111T>G	p.I704S	3	0		0	inf	0.918963
	c.2326G>A	p.G776R	2	2	0.934414	0.131	6.643	0.945954
SMARCAL1	c.1271A>T	p.D424V	39	37	1.01822	0.648	1.6	0.937597	1.13252	0.802	1.599	0.479183
	c.2114C>T	p.T705I	5	5	0.985945	0.285	3.414	0.982182
	c.2261G>A	p.R754H	2	1	2.25671	0.205	24.887	0.506338
	c.2401T>G	p.F801V	5	4	1.1528	0.309	4.3	0.832336
SUPT6H	c.2835G>T	p.L945F	3	1	2.89471	0.301	27.842	0.357422	0.706365	0.413	1.209	0.205128
TAB1	c.541G>A	p.A181T	4	0		0	inf	0.906937	1.97642	0.674	5.792	0.214233
TCF7	c.745G>C	p.D249H	2	2	0.971247	0.136	6.915	0.97676	0.709848	0.335	1.503	0.370726
TCF7L2	c.1586C>T	p.P529L	3	1	2.94072	0.306	28.279	0.350295	1.60648	0.825	3.127	0.163065
TIAM2	c.1793A>G	p.Y598C	6	0		0	inf	0.924651	1.23956	0.726	2.116	0.431168
	c.3814G>A	p.E1272K	3	2	1.33665	0.223	8.004	0.750673
TMEM161A	c.1342C>T	p.R448C	3	3	0.968043	0.195	4.807	0.968316	2.55971	1.189	5.512	0.0163156
	c.1021G>A	p.A341T	7	0		0	inf	0.918646
	c.968G>A	p.C323Y	2	2	0.986869	0.139	7.023	0.989467
TMEM206/PACC1	c.710G>A	p.R237H	4	3	1.20554	0.27	5.391	0.806772	1.4832	0.574	3.832	0.415707
	c.586T>C	p.F196L	2	3	0.622793	0.104	3.736	0.604424
TNC	c.730G>A	p.G244R	2	3	0.67265	0.112	4.034	0.664405	0.913918	0.559	1.495	0.720016
TP53	c.847C>T	p.R283C	2	1	1.78227	0.162	19.646	0.636973	2.22461	1.26	3.929	0.0058638
	c.818G>A	p.R273H	5	1	4.83524	0.564	41.476	0.150669
TRIM42	c.446G>A	p.C149Y	2	3	0.593655	0.099	3.555	0.567977	0.460099	0.115	1.841	0.272574
TRIM63	c.221G>A	p.R74H	2	1	1.84443	0.167	20.344	0.617213	1.55914	0.509	4.776	0.436801
TRPM1	c.296T>C	p.L99P	2	1	1.9374	0.175	21.429	0.589663	0.961359	0.625	1.478	0.857548
	c.215A>G	p.Y72C	2	3	0.686435	0.114	4.123	0.680843
TRPM4	c.1082T>G	p.L361R	3	3	0.890773	0.18	4.417	0.887406	0.969547	0.562	1.673	0.911532
	c.1294G>A	p.A432T	6	2	2.77468	0.56	13.747	0.211327
	c.2674C>T	p.R892C	4	7	0.612395	0.179	2.096	0.434636
	c.2767G>A	p.V923M	2	3	0.737624	0.123	4.436	0.739547
	c.3043T>G	p.Y1015D	4	1	3.61252	0.404	32.304	0.250524
USP5	c.755C>T	p.T252I	4	1	4.02734	0.449	36.087	0.213068	1.30935	0.55	3.114	0.542071
WRNIP1	c.1022T>G	p.F341C	2	1	1.8207	0.165	20.072	0.624605	1.13655	0.627	2.061	0.673343
	c.1118G>A	p.R373Q	2	1	1.78227	0.162	19.646	0.636973
	c.1549G>A	p.A517T	2	1	2.10232	0.19	23.256	0.544566
	c.1786G>A	p.A596T	2	1	1.8207	0.165	20.072	0.624605
	c.1840G>A	p.V614M	4	1	3.96527	0.442	35.547	0.21831
XDH	c.2737C>T	p.R913W	3	4	0.738208	0.165	3.308	0.691653	0.960561	0.635	1.452	0.84861
	c.1037C>T	p.A346V	3	0		0	inf	0.918361
	c.364A>T	p.M122L	2	3	0.630878	0.105	3.784	0.614258
XRCC2	c.271C>T	p.R91W	2	1	1.97822	0.179	21.865	0.577872	0.45807	0.141	1.49	0.194424
ZBTB39	c.209A>G	p.Y70C	3	0		0	inf	0.918865	1.38622	0.439	4.376	0.577664
ZFAND1	c.503T>G	p.V168G	12	6	1.93646	0.726	5.167	0.186908	1.27375	0.602	2.697	0.527272
